# Supplementary material for: Unveiling key descriptors via machine learning: toward rational molecular design of chromophores with excited-state intramolecular proton transfer
Source: Chem Sci. 2026 Feb 9;17(14):7146–56. doi: 10.1039/d5sc07051a (PMC12910287; doi:10.1039/d5sc07051a)
Supplement: SC-017-D5SC07051A-s001 [file SC-017-D5SC07051A-s001.xlsx]

## Sheet: Constructed ESIPT dataset
Unveiling Key Descriptors via Machine Learning: Toward Rational Molecular Design of Chromophores with Excited-State Intramolecular Proton Transfer Shengsheng Wei,1 Zipeng Yang,1 Chao Yang,1 Hongmei Zhao,1 Yang Li,1 Yuanyuan Guo,1 Andong Xia,1* Zhuoran Kuang,1* 1. State Key Laboratory of Information Photonic and Optical Communications, and School of Science, Beijing University of Posts and Telecom…
smiles	Calculated ΔE*	Class
[H]c1ccc2nc(-c3ccc(-c4ccc(N(c5ccccc5)c5ccccc5)cc4)cc3O)oc2c1	12.4854	HBO deriv.
N#Cc1ccc(-c2ccc(-c3nc4ccc(-c5ccc(N(c6ccccc6)c6ccccc6)cc5)cc4o3)c(O)c2)cc1	8.16871	HBO deriv.
O=[N+]([O-])c1ccc(-c2ccc(-c3nc4ccc(-c5ccc(N(c6ccccc6)c6ccccc6)cc5)cc4o3)c(O)c2)cc1	6.82009	HBO deriv.
Oc1cc(-c2ccc(C(F)(F)F)cc2)ccc1-c1nc2ccc(-c3ccc(N(c4ccccc4)c4ccccc4)cc3)cc2o1	9.47914	HBO deriv.
N#CC(C#N)=Cc1ccc(-c2ccc(-c3nc4ccc(-c5ccc(N(c6ccccc6)c6ccccc6)cc5)cc4o3)c(O)c2)cc1	7.06923	HBO deriv.
O=C(c1ccccc1)c1ccc(-c2nc3ccc(-c4ccc(N(c5ccccc5)c5ccccc5)cc4)cc3o2)c(O)c1	7.60586	HBO deriv.
[H]c1ccc(-c2nc3ccc(-c4ccc(N(c5ccccc5)c5ccccc5)cc4)cc3o2)c(O)c1	9.67191	HBO deriv.
CCN(CC)c1ccc(-c2ccc(-c3nc4ccc(-c5ccc(C#N)cc5)cc4o3)c(O)c2)cc1	13.5216	HBO deriv.
CCN(CC)c1ccc(-c2ccc(-c3nc4ccc(-c5ccc([N+](=O)[O-])cc5)cc4o3)c(O)c2)cc1	15.0474	HBO deriv.
CCN(CC)c1ccc(-c2ccc(-c3nc4ccc(-c5ccc(C(F)(F)F)cc5)cc4o3)c(O)c2)cc1	13.057	HBO deriv.
CCN(CC)c1ccc(-c2ccc(-c3nc4ccc(-c5ccc(C=C(C#N)C#N)cc5)cc4o3)c(O)c2)cc1	14.8878	HBO deriv.
CCN(CC)c1ccc(-c2ccc(-c3nc4ccc(C(=O)c5ccccc5)cc4o3)c(O)c2)cc1	14.0464	HBO deriv.
[H]c1ccc2nc(-c3ccc(-c4ccc(N(CC)CC)cc4)cc3O)oc2c1	10.8029	HBO deriv.
CCN(CC)c1ccc(-c2ccc3nc(-c4ccc(-c5ccc(C#N)cc5)cc4O)oc3c2)cc1	5.59714	HBO deriv.
CCN(CC)c1ccc(-c2ccc3nc(-c4ccc(-c5ccc([N+](=O)[O-])cc5)cc4O)oc3c2)cc1	6.34514	HBO deriv.
CCN(CC)c1ccc(-c2ccc3nc(-c4ccc(-c5ccc(C(F)(F)F)cc5)cc4O)oc3c2)cc1	6.00847	HBO deriv.
CCN(CC)c1ccc(-c2ccc3nc(-c4ccc(-c5ccc(C=C(C#N)C#N)cc5)cc4O)oc3c2)cc1	6.52307	HBO deriv.
CCN(CC)c1ccc(-c2ccc3nc(-c4ccc(C(=O)c5ccccc5)cc4O)oc3c2)cc1	4.37285	HBO deriv.
[H]c1ccc(-c2nc3ccc(-c4ccc(N(CC)CC)cc4)cc3o2)c(O)c1	5.16623	HBO deriv.
COc1ccc(-c2ccc(-c3nc4ccc(-c5ccc(C#N)cc5)cc4o3)c(O)c2)cc1	8.99665	HBO deriv.
COc1ccc(-c2ccc(-c3nc4ccc(-c5ccc([N+](=O)[O-])cc5)cc4o3)c(O)c2)cc1	8.27441	HBO deriv.
COc1ccc(-c2ccc(-c3nc4ccc(-c5ccc(C(F)(F)F)cc5)cc4o3)c(O)c2)cc1	7.9967	HBO deriv.
COc1ccc(-c2ccc(-c3nc4ccc(-c5ccc(C=C(C#N)C#N)cc5)cc4o3)c(O)c2)cc1	8.41029	HBO deriv.
COc1ccc(-c2ccc(-c3nc4ccc(C(=O)c5ccccc5)cc4o3)c(O)c2)cc1	7.06605	HBO deriv.
[H]c1ccc2nc(-c3ccc(-c4ccc(OC)cc4)cc3O)oc2c1	2.38268	HBO deriv.
COc1ccc(-c2ccc3nc(-c4ccc(-c5ccc(C#N)cc5)cc4O)oc3c2)cc1	-0.678924	HBO deriv.
COc1ccc(-c2ccc3nc(-c4ccc(-c5ccc([N+](=O)[O-])cc5)cc4O)oc3c2)cc1	-1.15547	HBO deriv.
COc1ccc(-c2ccc3nc(-c4ccc(-c5ccc(C(F)(F)F)cc5)cc4O)oc3c2)cc1	0.436698	HBO deriv.
COc1ccc(-c2ccc3nc(-c4ccc(-c5ccc(C=C(C#N)C#N)cc5)cc4O)oc3c2)cc1	-0.772283	HBO deriv.
COc1ccc(-c2ccc3nc(-c4ccc(C(=O)c5ccccc5)cc4O)oc3c2)cc1	-3.56729	HBO deriv.
[H]c1ccc(-c2nc3ccc(-c4ccc(OC)cc4)cc3o2)c(O)c1	0.535478	HBO deriv.
CN(C)c1ccc(-c2ccc(-c3nc4ccc(-c5ccc(C#N)cc5)cc4o3)c(O)c2)cc1	13.4468	HBO deriv.
CN(C)c1ccc(-c2ccc(-c3nc4ccc(-c5ccc([N+](=O)[O-])cc5)cc4o3)c(O)c2)cc1	14.8779	HBO deriv.
CN(C)c1ccc(-c2ccc(-c3nc4ccc(-c5ccc(C(F)(F)F)cc5)cc4o3)c(O)c2)cc1	12.9842	HBO deriv.
CN(C)c1ccc(-c2ccc(-c3nc4ccc(-c5ccc(C=C(C#N)C#N)cc5)cc4o3)c(O)c2)cc1	14.7305	HBO deriv.
CN(C)c1ccc(-c2ccc(-c3nc4ccc(C(=O)c5ccccc5)cc4o3)c(O)c2)cc1	13.9495	HBO deriv.
[H]c1ccc2nc(-c3ccc(-c4ccc(N(C)C)cc4)cc3O)oc2c1	10.0199	HBO deriv.
CN(C)c1ccc(-c2ccc3nc(-c4ccc(-c5ccc(C#N)cc5)cc4O)oc3c2)cc1	5.42474	HBO deriv.
CN(C)c1ccc(-c2ccc3nc(-c4ccc(-c5ccc([N+](=O)[O-])cc5)cc4O)oc3c2)cc1	6.20603	HBO deriv.
CN(C)c1ccc(-c2ccc3nc(-c4ccc(-c5ccc(C(F)(F)F)cc5)cc4O)oc3c2)cc1	5.86145	HBO deriv.
CN(C)c1ccc(-c2ccc3nc(-c4ccc(-c5ccc(C=C(C#N)C#N)cc5)cc4O)oc3c2)cc1	6.45154	HBO deriv.
CN(C)c1ccc(-c2ccc3nc(-c4ccc(C(=O)c5ccccc5)cc4O)oc3c2)cc1	4.13259	HBO deriv.
[H]c1ccc(-c2nc3ccc(-c4ccc(N(C)C)cc4)cc3o2)c(O)c1	5.28912	HBO deriv.
Cc1cc(-c2ccc(-c3nc4ccc(-c5ccc(C#N)cc5)cc4o3)c(O)c2)cc(C)c1C	7.42384	HBO deriv.
Cc1cc(-c2ccc(-c3nc4ccc(-c5ccc([N+](=O)[O-])cc5)cc4o3)c(O)c2)cc(C)c1C	6.2626	HBO deriv.
Cc1cc(-c2ccc(-c3nc4ccc(-c5ccc(C(F)(F)F)cc5)cc4o3)c(O)c2)cc(C)c1C	6.48568	HBO deriv.
Cc1cc(-c2ccc(-c3nc4ccc(-c5ccc(C=C(C#N)C#N)cc5)cc4o3)c(O)c2)cc(C)c1C	6.44561	HBO deriv.
Cc1cc(-c2ccc(-c3nc4ccc(C(=O)c5ccccc5)cc4o3)c(O)c2)cc(C)c1C	5.31379	HBO deriv.
[H]c1ccc2nc(-c3ccc(-c4cc(C)c(C)c(C)c4)cc3O)oc2c1	0.906098	HBO deriv.
Cc1cc(-c2ccc3nc(-c4ccc(-c5ccc(C#N)cc5)cc4O)oc3c2)cc(C)c1C	-1.8547	HBO deriv.
Cc1cc(-c2ccc3nc(-c4ccc(-c5ccc([N+](=O)[O-])cc5)cc4O)oc3c2)cc(C)c1C	-3.48375	HBO deriv.
Cc1cc(-c2ccc3nc(-c4ccc(-c5ccc(C(F)(F)F)cc5)cc4O)oc3c2)cc(C)c1C	-0.525999	HBO deriv.
Cc1cc(-c2ccc3nc(-c4ccc(-c5ccc(C=C(C#N)C#N)cc5)cc4O)oc3c2)cc(C)c1C	-3.02216	HBO deriv.
Cc1cc(-c2ccc3nc(-c4ccc(C(=O)c5ccccc5)cc4O)oc3c2)cc(C)c1C	-1.52648	HBO deriv.
[H]c1ccc(-c2nc3ccc(-c4cc(C)c(C)c(C)c4)cc3o2)c(O)c1	-0.128574	HBO deriv.
[H]c1ccc(-c2nc3ccc(-c4ccc(C#N)cc4)cc3o2)c(O)c1	0.762032	HBO deriv.
[H]c1ccc(-c2nc3ccc(-c4ccc([N+](=O)[O-])cc4)cc3o2)c(O)c1	0.0311982	HBO deriv.
[H]c1ccc(-c2nc3ccc(-c4ccc(C(F)(F)F)cc4)cc3o2)c(O)c1	-0.304548	HBO deriv.
[H]c1ccc(-c2nc3ccc(-c4ccc(C=C(C#N)C#N)cc4)cc3o2)c(O)c1	0.362865	HBO deriv.
[H]c1ccc(-c2nc3ccc(C(=O)c4ccccc4)cc3o2)c(O)c1	6.90718	HBO deriv.
[H]c1ccc(-c2nc3ccc([H])cc3o2)c(O)c1	-5.54369	HBO deriv.
[H]c1ccc2nc(-c3ccc(-c4ccc(C#N)cc4)cc3O)oc2c1	-6.80082	HBO deriv.
[H]c1ccc2nc(-c3ccc(-c4ccc([N+](=O)[O-])cc4)cc3O)oc2c1	-8.31823	HBO deriv.
[H]c1ccc2nc(-c3ccc(-c4ccc(C(F)(F)F)cc4)cc3O)oc2c1	-5.85142	HBO deriv.
[H]c1ccc2nc(-c3ccc(-c4ccc(C=C(C#N)C#N)cc4)cc3O)oc2c1	-7.87986	HBO deriv.
[H]c1ccc2nc(-c3ccc(C(=O)c4ccccc4)cc3O)oc2c1	-3.11572	HBO deriv.
CCN(CC)c1ccc(-c2ccc(-c3nc4ccc(-c5ccc(N(CC)CC)cc5)cc4o3)c(O)c2)cc1	9.94365	HBO deriv.
CCN(CC)c1ccc(-c2ccc(-c3nc4ccc(-c5ccc(N(C)C)cc5)cc4o3)c(O)c2)cc1	9.09057	HBO deriv.
CCN(CC)c1ccc(-c2ccc(-c3nc4ccc(-c5ccc(N(c6ccccc6)c6ccccc6)cc5)cc4o3)c(O)c2)cc1	11.1315	HBO deriv.
CCN(CC)c1ccc(-c2ccc(-c3nc4ccc(-c5cc(C)c(C)c(C)c5)cc4o3)c(O)c2)cc1	7.30033	HBO deriv.
CCN(CC)c1ccc(-c2ccc(-c3nc4ccc(-c5ccc(OC)cc5)cc4o3)c(O)c2)cc1	7.33159	HBO deriv.
CCN(CC)c1ccc(-c2ccc3nc(-c4ccc(-c5ccc(N(C)C)cc5)cc4O)oc3c2)cc1	13.8035	HBO deriv.
CN(C)c1ccc(-c2ccc(-c3nc4ccc(-c5ccc(N(C)C)cc5)cc4o3)c(O)c2)cc1	11.2851	HBO deriv.
CN(C)c1ccc(-c2ccc(-c3nc4ccc(-c5ccc(N(c6ccccc6)c6ccccc6)cc5)cc4o3)c(O)c2)cc1	11.8485	HBO deriv.
Cc1cc(-c2ccc3nc(-c4ccc(-c5ccc(N(C)C)cc5)cc4O)oc3c2)cc(C)c1C	7.66841	HBO deriv.
COc1ccc(-c2ccc3nc(-c4ccc(-c5ccc(N(C)C)cc5)cc4O)oc3c2)cc1	7.68284	HBO deriv.
CCN(CC)c1ccc(-c2ccc3nc(-c4ccc(-c5ccc(N(c6ccccc6)c6ccccc6)cc5)cc4O)oc3c2)cc1	8.97482	HBO deriv.
CN(C)c1ccc(-c2ccc3nc(-c4ccc(-c5ccc(N(c6ccccc6)c6ccccc6)cc5)cc4O)oc3c2)cc1	10.4221	HBO deriv.
Oc1cc(-c2ccc(N(c3ccccc3)c3ccccc3)cc2)ccc1-c1nc2ccc(-c3ccc(N(c4ccccc4)c4ccccc4)cc3)cc2o1	10.6134	HBO deriv.
Cc1cc(-c2ccc3nc(-c4ccc(-c5ccc(N(c6ccccc6)c6ccccc6)cc5)cc4O)oc3c2)cc(C)c1C	9.88965	HBO deriv.
COc1ccc(-c2ccc3nc(-c4ccc(-c5ccc(N(c6ccccc6)c6ccccc6)cc5)cc4O)oc3c2)cc1	9.93425	HBO deriv.
CCN(CC)c1ccc(-c2ccc3nc(-c4ccc(-c5cc(C)c(C)c(C)c5)cc4O)oc3c2)cc1	14.2378	HBO deriv.
Cc1cc(-c2ccc(-c3nc4ccc(-c5ccc(N(C)C)cc5)cc4o3)c(O)c2)cc(C)c1C	11.7202	HBO deriv.
Cc1cc(-c2ccc(-c3nc4ccc(-c5ccc(N(c6ccccc6)c6ccccc6)cc5)cc4o3)c(O)c2)cc(C)c1C	12.8578	HBO deriv.
Cc1cc(-c2ccc(-c3nc4ccc(-c5cc(C)c(C)c(C)c5)cc4o3)c(O)c2)cc(C)c1C	4.62393	HBO deriv.
COc1ccc(-c2ccc3nc(-c4ccc(-c5cc(C)c(C)c(C)c5)cc4O)oc3c2)cc1	5.64004	HBO deriv.
CCN(CC)c1ccc(-c2ccc3nc(-c4ccc(-c5ccc(OC)cc5)cc4O)oc3c2)cc1	12.1027	HBO deriv.
COc1ccc(-c2ccc(-c3nc4ccc(-c5ccc(N(C)C)cc5)cc4o3)c(O)c2)cc1	11.8048	HBO deriv.
COc1ccc(-c2ccc(-c3nc4ccc(-c5ccc(N(c6ccccc6)c6ccccc6)cc5)cc4o3)c(O)c2)cc1	12.8514	HBO deriv.
COc1ccc(-c2ccc(-c3nc4ccc(-c5cc(C)c(C)c(C)c5)cc4o3)c(O)c2)cc1	4.8911	HBO deriv.
COc1ccc(-c2ccc(-c3nc4ccc(-c5ccc(OC)cc5)cc4o3)c(O)c2)cc1	5.85062	HBO deriv.
N#CC(C#N)=Cc1ccc(-c2ccc(-c3nc4ccc(-c5ccc(C=C(C#N)C#N)cc5)cc4o3)c(O)c2)cc1	-0.898351	HBO deriv.
N#CC(C#N)=Cc1ccc(-c2ccc(-c3nc4ccc(-c5ccc([N+](=O)[O-])cc5)cc4o3)c(O)c2)cc1	0.992731	HBO deriv.
N#CC(C#N)=Cc1ccc(-c2ccc(-c3nc4ccc(C(=O)c5ccccc5)cc4o3)c(O)c2)cc1	0.718564	HBO deriv.
N#CC(C#N)=Cc1ccc(-c2ccc(-c3nc4ccc(-c5ccc(C#N)cc5)cc4o3)c(O)c2)cc1	3.03969	HBO deriv.
N#CC(C#N)=Cc1ccc(-c2ccc(-c3nc4ccc(-c5ccc(C(F)(F)F)cc5)cc4o3)c(O)c2)cc1	2.78528	HBO deriv.
N#CC(C#N)=Cc1ccc(-c2ccc3nc(-c4ccc(-c5ccc([N+](=O)[O-])cc5)cc4O)oc3c2)cc1	-4.47156	HBO deriv.
O=[N+]([O-])c1ccc(-c2ccc(-c3nc4ccc(-c5ccc([N+](=O)[O-])cc5)cc4o3)c(O)c2)cc1	-3.79418	HBO deriv.
O=C(c1ccccc1)c1ccc2nc(-c3ccc(-c4ccc([N+](=O)[O-])cc4)cc3O)oc2c1	0.599211	HBO deriv.
N#Cc1ccc(-c2ccc3nc(-c4ccc(-c5ccc([N+](=O)[O-])cc5)cc4O)oc3c2)cc1	2.76302	HBO deriv.
O=[N+]([O-])c1ccc(-c2ccc(-c3nc4ccc(-c5ccc(C(F)(F)F)cc5)cc4o3)c(O)c2)cc1	2.51343	HBO deriv.
N#CC(C#N)=Cc1ccc(-c2ccc3nc(-c4ccc(C(=O)c5ccccc5)cc4O)oc3c2)cc1	-6.75271	HBO deriv.
O=C(c1ccccc1)c1ccc(-c2nc3ccc(-c4ccc([N+](=O)[O-])cc4)cc3o2)c(O)c1	-7.25483	HBO deriv.
O=C(c1ccccc1)c1ccc(-c2nc3ccc(C(=O)c4ccccc4)cc3o2)c(O)c1	3.43502	HBO deriv.
N#Cc1ccc(-c2ccc3nc(-c4ccc(C(=O)c5ccccc5)cc4O)oc3c2)cc1	5.4448	HBO deriv.
O=C(c1ccccc1)c1ccc(-c2nc3ccc(-c4ccc(C(F)(F)F)cc4)cc3o2)c(O)c1	7.07126	HBO deriv.
N#CC(C#N)=Cc1ccc(-c2ccc3nc(-c4ccc(-c5ccc(C#N)cc5)cc4O)oc3c2)cc1	-5.0456	HBO deriv.
N#Cc1ccc(-c2ccc(-c3nc4ccc(-c5ccc([N+](=O)[O-])cc5)cc4o3)c(O)c2)cc1	-5.81447	HBO deriv.
N#Cc1ccc(-c2ccc(-c3nc4ccc(C(=O)c5ccccc5)cc4o3)c(O)c2)cc1	-2.45849	HBO deriv.
N#Cc1ccc(-c2ccc(-c3nc4ccc(-c5ccc(C#N)cc5)cc4o3)c(O)c2)cc1	1.37839	HBO deriv.
N#Cc1ccc(-c2ccc(-c3nc4ccc(-c5ccc(C(F)(F)F)cc5)cc4o3)c(O)c2)cc1	3.0354	HBO deriv.
N#CC(C#N)=Cc1ccc(-c2ccc3nc(-c4ccc(-c5ccc(C(F)(F)F)cc5)cc4O)oc3c2)cc1	-5.49103	HBO deriv.
O=[N+]([O-])c1ccc(-c2ccc3nc(-c4ccc(-c5ccc(C(F)(F)F)cc5)cc4O)oc3c2)cc1	-6.21958	HBO deriv.
O=C(c1ccccc1)c1ccc2nc(-c3ccc(-c4ccc(C(F)(F)F)cc4)cc3O)oc2c1	-0.0613048	HBO deriv.
N#Cc1ccc(-c2ccc3nc(-c4ccc(-c5ccc(C(F)(F)F)cc5)cc4O)oc3c2)cc1	-0.698938	HBO deriv.
Oc1cc(-c2ccc(C(F)(F)F)cc2)ccc1-c1nc2ccc(-c3ccc(C(F)(F)F)cc3)cc2o1	1.14774	HBO deriv.
N#Cc1ccc(-c2cnc3c(ccc4cc(-c5ccc(N(c6ccccc6)c6ccccc6)cc5)cc(O)c43)c2)cc1	2.75573	HBQ deriv.
O=[N+]([O-])c1ccc(-c2cnc3c(ccc4cc(-c5ccc(N(c6ccccc6)c6ccccc6)cc5)cc(O)c43)c2)cc1	6.25043	HBQ deriv.
Oc1cc(-c2ccc(N(c3ccccc3)c3ccccc3)cc2)cc2ccc3cc(-c4ccc(C(F)(F)F)cc4)cnc3c12	0.720062	HBQ deriv.
N#CC(C#N)=Cc1ccc(-c2cnc3c(ccc4cc(-c5ccc(N(c6ccccc6)c6ccccc6)cc5)cc(O)c43)c2)cc1	6.50035	HBQ deriv.
O=C(c1ccccc1)c1cnc2c(ccc3cc(-c4ccc(N(c5ccccc5)c5ccccc5)cc4)cc(O)c32)c1	3.18831	HBQ deriv.
[H]c1cnc2c(ccc3cc(-c4ccc(N(c5ccccc5)c5ccccc5)cc4)cc(O)c32)c1	-2.50711	HBQ deriv.
N#Cc1ccc(-c2cc(O)c3c(ccc4cc(-c5ccc(N(c6ccccc6)c6ccccc6)cc5)cnc43)c2)cc1	0.1702	HBQ deriv.
O=[N+]([O-])c1ccc(-c2cc(O)c3c(ccc4cc(-c5ccc(N(c6ccccc6)c6ccccc6)cc5)cnc43)c2)cc1	5.1345	HBQ deriv.
Oc1cc(-c2ccc(C(F)(F)F)cc2)cc2ccc3cc(-c4ccc(N(c5ccccc5)c5ccccc5)cc4)cnc3c12	-1.13181	HBQ deriv.
N#CC(C#N)=Cc1ccc(-c2cc(O)c3c(ccc4cc(-c5ccc(N(c6ccccc6)c6ccccc6)cc5)cnc43)c2)cc1	5.24326	HBQ deriv.
O=C(c1ccccc1)c1cc(O)c2c(ccc3cc(-c4ccc(N(c5ccccc5)c5ccccc5)cc4)cnc32)c1	0.468178	HBQ deriv.
[H]c1cc(O)c2c(ccc3cc(-c4ccc(N(c5ccccc5)c5ccccc5)cc4)cnc32)c1	-4.06518	HBQ deriv.
CCN(CC)c1ccc(-c2cc(O)c3c(ccc4cc(-c5ccc(C#N)cc5)cnc43)c2)cc1	2.21651	HBQ deriv.
CCN(CC)c1ccc(-c2cc(O)c3c(ccc4cc(-c5ccc([N+](=O)[O-])cc5)cnc43)c2)cc1	3.8534	HBQ deriv.
CCN(CC)c1ccc(-c2cc(O)c3c(ccc4cc(-c5ccc(C(F)(F)F)cc5)cnc43)c2)cc1	0.0210883	HBQ deriv.
CCN(CC)c1ccc(-c2cc(O)c3c(ccc4cc(-c5ccc(C=C(C#N)C#N)cc5)cnc43)c2)cc1	4.50412	HBQ deriv.
CCN(CC)c1ccc(-c2cc(O)c3c(ccc4cc(C(=O)c5ccccc5)cnc43)c2)cc1	2.74261	HBQ deriv.
[H]c1cnc2c(ccc3cc(-c4ccc(N(CC)CC)cc4)cc(O)c32)c1	-2.39443	HBQ deriv.
CCN(CC)c1ccc(-c2cnc3c(ccc4cc(-c5ccc(C#N)cc5)cc(O)c43)c2)cc1	-3.90752	HBQ deriv.
CCN(CC)c1ccc(-c2cnc3c(ccc4cc(-c5ccc([N+](=O)[O-])cc5)cc(O)c43)c2)cc1	2.65485	HBQ deriv.
CCN(CC)c1ccc(-c2cnc3c(ccc4cc(-c5ccc(C(F)(F)F)cc5)cc(O)c43)c2)cc1	-5.06985	HBQ deriv.
CCN(CC)c1ccc(-c2cnc3c(ccc4cc(-c5ccc(C=C(C#N)C#N)cc5)cc(O)c43)c2)cc1	2.84106	HBQ deriv.
CCN(CC)c1ccc(-c2cnc3c(ccc4cc(C(=O)c5ccccc5)cc(O)c43)c2)cc1	-3.56339	HBQ deriv.
[H]c1cc(O)c2c(ccc3cc(-c4ccc(N(CC)CC)cc4)cnc32)c1	-7.14881	HBQ deriv.
COc1ccc(-c2cc(O)c3c(ccc4cc(-c5ccc(C#N)cc5)cnc43)c2)cc1	-4.25828	HBQ deriv.
COc1ccc(-c2cc(O)c3c(ccc4cc(-c5ccc([N+](=O)[O-])cc5)cnc43)c2)cc1	-4.0387	HBQ deriv.
COc1ccc(-c2cc(O)c3c(ccc4cc(-c5ccc(C(F)(F)F)cc5)cnc43)c2)cc1	-6.24569	HBQ deriv.
COc1ccc(-c2cc(O)c3c(ccc4cc(-c5ccc(C=C(C#N)C#N)cc5)cnc43)c2)cc1	-3.56749	HBQ deriv.
COc1ccc(-c2cc(O)c3c(ccc4cc(C(=O)c5ccccc5)cnc43)c2)cc1	-5.6043	HBQ deriv.
[H]c1cnc2c(ccc3cc(-c4ccc(OC)cc4)cc(O)c32)c1	-13.855	HBQ deriv.
COc1ccc(-c2cnc3c(ccc4cc(-c5ccc(C#N)cc5)cc(O)c43)c2)cc1	-8.19981	HBQ deriv.
COc1ccc(-c2cnc3c(ccc4cc(-c5ccc([N+](=O)[O-])cc5)cc(O)c43)c2)cc1	-1.06713	HBQ deriv.
COc1ccc(-c2cnc3c(ccc4cc(-c5ccc(C(F)(F)F)cc5)cc(O)c43)c2)cc1	-9.2213	HBQ deriv.
COc1ccc(-c2cnc3c(ccc4cc(-c5ccc(C=C(C#N)C#N)cc5)cc(O)c43)c2)cc1	-1.1224	HBQ deriv.
COc1ccc(-c2cnc3c(ccc4cc(C(=O)c5ccccc5)cc(O)c43)c2)cc1	-4.97723	HBQ deriv.
[H]c1cc(O)c2c(ccc3cc(-c4ccc(OC)cc4)cnc32)c1	-14.7662	HBQ deriv.
CN(C)c1ccc(-c2cc(O)c3c(ccc4cc(-c5ccc(C#N)cc5)cnc43)c2)cc1	2.16141	HBQ deriv.
CN(C)c1ccc(-c2cc(O)c3c(ccc4cc(-c5ccc([N+](=O)[O-])cc5)cnc43)c2)cc1	3.02948	HBQ deriv.
CN(C)c1ccc(-c2cc(O)c3c(ccc4cc(-c5ccc(C(F)(F)F)cc5)cnc43)c2)cc1	-0.0214389	HBQ deriv.
CN(C)c1ccc(-c2cc(O)c3c(ccc4cc(-c5ccc(C=C(C#N)C#N)cc5)cnc43)c2)cc1	3.53921	HBQ deriv.
CN(C)c1ccc(-c2cc(O)c3c(ccc4cc(C(=O)c5ccccc5)cnc43)c2)cc1	-0.395501	HBQ deriv.
[H]c1cnc2c(ccc3cc(-c4ccc(N(C)C)cc4)cc(O)c32)c1	-3.09152	HBQ deriv.
CN(C)c1ccc(-c2cnc3c(ccc4cc(-c5ccc(C#N)cc5)cc(O)c43)c2)cc1	-4.64031	HBQ deriv.
CN(C)c1ccc(-c2cnc3c(ccc4cc(-c5ccc([N+](=O)[O-])cc5)cc(O)c43)c2)cc1	1.95174	HBQ deriv.
CN(C)c1ccc(-c2cnc3c(ccc4cc(-c5ccc(C(F)(F)F)cc5)cc(O)c43)c2)cc1	-5.76857	HBQ deriv.
CN(C)c1ccc(-c2cnc3c(ccc4cc(-c5ccc(C=C(C#N)C#N)cc5)cc(O)c43)c2)cc1	2.14221	HBQ deriv.
CN(C)c1ccc(-c2cnc3c(ccc4cc(C(=O)c5ccccc5)cc(O)c43)c2)cc1	-3.76349	HBQ deriv.
[H]c1cc(O)c2c(ccc3cc(-c4ccc(N(C)C)cc4)cnc32)c1	-7.8146	HBQ deriv.
Cc1cc(-c2cc(O)c3c(ccc4cc(-c5ccc(C#N)cc5)cnc43)c2)cc(C)c1C	-4.44986	HBQ deriv.
Cc1cc(-c2cc(O)c3c(ccc4cc(-c5ccc([N+](=O)[O-])cc5)cnc43)c2)cc(C)c1C	-4.49647	HBQ deriv.
Cc1cc(-c2cc(O)c3c(ccc4cc(-c5ccc(C(F)(F)F)cc5)cnc43)c2)cc(C)c1C	-6.40942	HBQ deriv.
Cc1cc(-c2cc(O)c3c(ccc4cc(-c5ccc(C=C(C#N)C#N)cc5)cnc43)c2)cc(C)c1C	-3.9029	HBQ deriv.
Cc1cc(-c2cc(O)c3c(ccc4cc(C(=O)c5ccccc5)cnc43)c2)cc(C)c1C	-6.49413	HBQ deriv.
[H]c1cnc2c(ccc3cc(-c4cc(C)c(C)c(C)c4)cc(O)c32)c1	-14.2536	HBQ deriv.
Cc1cc(-c2cnc3c(ccc4cc(-c5ccc(C#N)cc5)cc(O)c43)c2)cc(C)c1C	-8.30338	HBQ deriv.
Cc1cc(-c2cnc3c(ccc4cc(-c5ccc([N+](=O)[O-])cc5)cc(O)c43)c2)cc(C)c1C	-1.3625	HBQ deriv.
Cc1cc(-c2cnc3c(ccc4cc(-c5ccc(C(F)(F)F)cc5)cc(O)c43)c2)cc(C)c1C	-9.4721	HBQ deriv.
Cc1cc(-c2cnc3c(ccc4cc(-c5ccc(C=C(C#N)C#N)cc5)cc(O)c43)c2)cc(C)c1C	-1.53396	HBQ deriv.
Cc1cc(-c2cnc3c(ccc4cc(C(=O)c5ccccc5)cc(O)c43)c2)cc(C)c1C	-5.82213	HBQ deriv.
[H]c1cc(O)c2c(ccc3cc(-c4cc(C)c(C)c(C)c4)cnc32)c1	-15.0691	HBQ deriv.
[H]c1cc(O)c2c(ccc3cc(-c4ccc(C#N)cc4)cnc32)c1	-5.66681	HBQ deriv.
[H]c1cc(O)c2c(ccc3cc(-c4ccc([N+](=O)[O-])cc4)cnc32)c1	-5.47376	HBQ deriv.
[H]c1cc(O)c2c(ccc3cc(-c4ccc(C(F)(F)F)cc4)cnc32)c1	-7.66007	HBQ deriv.
[H]c1cc(O)c2c(ccc3cc(-c4ccc(C=C(C#N)C#N)cc4)cnc32)c1	-4.84074	HBQ deriv.
[H]c1cc(O)c2c(ccc3cc(C(=O)c4ccccc4)cnc32)c1	-7.48561	HBQ deriv.
[H]c1cnc2c(ccc3cc([H])cc(O)c32)c1	-16.1968	HBQ deriv.
[H]c1cnc2c(ccc3cc(-c4ccc(C#N)cc4)cc(O)c32)c1	-9.91067	HBQ deriv.
[H]c1cnc2c(ccc3cc(-c4ccc([N+](=O)[O-])cc4)cc(O)c32)c1	-1.31599	HBQ deriv.
[H]c1cnc2c(ccc3cc(-c4ccc(C(F)(F)F)cc4)cc(O)c32)c1	-14.9438	HBQ deriv.
[H]c1cnc2c(ccc3cc(-c4ccc(C=C(C#N)C#N)cc4)cc(O)c32)c1	-1.48351	HBQ deriv.
[H]c1cnc2c(ccc3cc(C(=O)c4ccccc4)cc(O)c32)c1	-6.73175	HBQ deriv.
CCN(CC)c1ccc(-c2cnc3c(ccc4cc(-c5ccc(N(CC)CC)cc5)cc(O)c43)c2)cc1	-3.31437	HBQ deriv.
CCN(CC)c1ccc(-c2cc(O)c3c(ccc4cc(-c5ccc(N(C)C)cc5)cnc43)c2)cc1	-3.28548	HBQ deriv.
CCN(CC)c1ccc(-c2cc(O)c3c(ccc4cc(-c5ccc(N(c6ccccc6)c6ccccc6)cc5)cnc43)c2)cc1	-1.74626	HBQ deriv.
CCN(CC)c1ccc(-c2cc(O)c3c(ccc4cc(-c5cc(C)c(C)c(C)c5)cnc43)c2)cc1	-1.08237	HBQ deriv.
CCN(CC)c1ccc(-c2cc(O)c3c(ccc4cc(-c5ccc(OC)cc5)cnc43)c2)cc1	-0.808711	HBQ deriv.
CCN(CC)c1ccc(-c2cnc3c(ccc4cc(-c5ccc(N(C)C)cc5)cc(O)c43)c2)cc1	-3.87384	HBQ deriv.
CN(C)c1ccc(-c2cnc3c(ccc4cc(-c5ccc(N(C)C)cc5)cc(O)c43)c2)cc1	-3.90203	HBQ deriv.
CN(C)c1ccc(-c2cc(O)c3c(ccc4cc(-c5ccc(N(c6ccccc6)c6ccccc6)cc5)cnc43)c2)cc1	-2.4967	HBQ deriv.
Cc1cc(-c2cnc3c(ccc4cc(-c5ccc(N(C)C)cc5)cc(O)c43)c2)cc(C)c1C	-3.65892	HBQ deriv.
COc1ccc(-c2cnc3c(ccc4cc(-c5ccc(N(C)C)cc5)cc(O)c43)c2)cc1	-3.2826	HBQ deriv.
CCN(CC)c1ccc(-c2cnc3c(ccc4cc(-c5ccc(N(c6ccccc6)c6ccccc6)cc5)cc(O)c43)c2)cc1	-3.53095	HBQ deriv.
CN(C)c1ccc(-c2cnc3c(ccc4cc(-c5ccc(N(c6ccccc6)c6ccccc6)cc5)cc(O)c43)c2)cc1	-3.57053	HBQ deriv.
Oc1cc(-c2ccc(N(c3ccccc3)c3ccccc3)cc2)cc2ccc3cc(-c4ccc(N(c5ccccc5)c5ccccc5)cc4)cnc3c12	-1.33384	HBQ deriv.
Cc1cc(-c2cnc3c(ccc4cc(-c5ccc(N(c6ccccc6)c6ccccc6)cc5)cc(O)c43)c2)cc(C)c1C	-2.81763	HBQ deriv.
COc1ccc(-c2cnc3c(ccc4cc(-c5ccc(N(c6ccccc6)c6ccccc6)cc5)cc(O)c43)c2)cc1	-2.46427	HBQ deriv.
CCN(CC)c1ccc(-c2cnc3c(ccc4cc(-c5cc(C)c(C)c(C)c5)cc(O)c43)c2)cc1	-6.69185	HBQ deriv.
Cc1cc(-c2cc(O)c3c(ccc4cc(-c5ccc(N(C)C)cc5)cnc43)c2)cc(C)c1C	-6.86135	HBQ deriv.
Cc1cc(-c2cc(O)c3c(ccc4cc(-c5ccc(N(c6ccccc6)c6ccccc6)cc5)cnc43)c2)cc(C)c1C	-4.34123	HBQ deriv.
COc1ccc(-c2cnc3c(ccc4cc(-c5cc(C)c(C)c(C)c5)cc(O)c43)c2)cc1	-8.37585	HBQ deriv.
CCN(CC)c1ccc(-c2cnc3c(ccc4cc(-c5ccc(OC)cc5)cc(O)c43)c2)cc1	-6.43884	HBQ deriv.
COc1ccc(-c2cc(O)c3c(ccc4cc(-c5ccc(N(C)C)cc5)cnc43)c2)cc1	-6.6113	HBQ deriv.
COc1ccc(-c2cc(O)c3c(ccc4cc(-c5ccc(N(c6ccccc6)c6ccccc6)cc5)cnc43)c2)cc1	-3.93746	HBQ deriv.
COc1ccc(-c2cc(O)c3c(ccc4cc(-c5cc(C)c(C)c(C)c5)cnc43)c2)cc1	-8.42646	HBQ deriv.
COc1ccc(-c2cnc3c(ccc4cc(-c5ccc(OC)cc5)cc(O)c43)c2)cc1	-8.08422	HBQ deriv.
N#CC(C#N)=Cc1ccc(-c2cnc3c(ccc4cc(-c5ccc(C=C(C#N)C#N)cc5)cc(O)c43)c2)cc1	-4.56509	HBQ deriv.
N#CC(C#N)=Cc1ccc(-c2cc(O)c3c(ccc4cc(-c5ccc([N+](=O)[O-])cc5)cnc43)c2)cc1	-4.65777	HBQ deriv.
N#CC(C#N)=Cc1ccc(-c2cc(O)c3c(ccc4cc(C(=O)c5ccccc5)cnc43)c2)cc1	-1.39467	HBQ deriv.
N#CC(C#N)=Cc1ccc(-c2cc(O)c3c(ccc4cc(-c5ccc(C#N)cc5)cnc43)c2)cc1	-0.589243	HBQ deriv.
N#CC(C#N)=Cc1ccc(-c2cc(O)c3c(ccc4cc(-c5ccc(C(F)(F)F)cc5)cnc43)c2)cc1	-0.813068	HBQ deriv.
N#CC(C#N)=Cc1ccc(-c2cnc3c(ccc4cc(-c5ccc([N+](=O)[O-])cc5)cc(O)c43)c2)cc1	-4.83905	HBQ deriv.
O=[N+]([O-])c1ccc(-c2cnc3c(ccc4cc(-c5ccc([N+](=O)[O-])cc5)cc(O)c43)c2)cc1	-5.31864	HBQ deriv.
O=C(c1ccccc1)c1cnc2c(ccc3cc(-c4ccc([N+](=O)[O-])cc4)cc(O)c32)c1	-2.26058	HBQ deriv.
N#Cc1ccc(-c2cnc3c(ccc4cc(-c5ccc([N+](=O)[O-])cc5)cc(O)c43)c2)cc1	-0.479464	HBQ deriv.
O=[N+]([O-])c1ccc(-c2cc(O)c3c(ccc4cc(-c5ccc(C(F)(F)F)cc5)cnc43)c2)cc1	1.05802	HBQ deriv.
N#CC(C#N)=Cc1ccc(-c2cnc3c(ccc4cc(C(=O)c5ccccc5)cc(O)c43)c2)cc1	-4.25807	HBQ deriv.
O=C(c1ccccc1)c1cc(O)c2c(ccc3cc(-c4ccc([N+](=O)[O-])cc4)cnc32)c1	-5.01135	HBQ deriv.
O=C(c1ccccc1)c1cnc2c(ccc3cc(C(=O)c4ccccc4)cc(O)c32)c1	-3.76836	HBQ deriv.
N#Cc1ccc(-c2cnc3c(ccc4cc(C(=O)c5ccccc5)cc(O)c43)c2)cc1	-3.43885	HBQ deriv.
O=C(c1ccccc1)c1cc(O)c2c(ccc3cc(-c4ccc(C(F)(F)F)cc4)cnc32)c1	-5.09093	HBQ deriv.
N#CC(C#N)=Cc1ccc(-c2cnc3c(ccc4cc(-c5ccc(C#N)cc5)cc(O)c43)c2)cc1	-4.73204	HBQ deriv.
N#Cc1ccc(-c2cc(O)c3c(ccc4cc(-c5ccc([N+](=O)[O-])cc5)cnc43)c2)cc1	-5.25129	HBQ deriv.
N#Cc1ccc(-c2cc(O)c3c(ccc4cc(C(=O)c5ccccc5)cnc43)c2)cc1	-7.31812	HBQ deriv.
N#Cc1ccc(-c2cnc3c(ccc4cc(-c5ccc(C#N)cc5)cc(O)c43)c2)cc1	-5.39028	HBQ deriv.
N#Cc1ccc(-c2cc(O)c3c(ccc4cc(-c5ccc(C(F)(F)F)cc5)cnc43)c2)cc1	-7.06202	HBQ deriv.
N#CC(C#N)=Cc1ccc(-c2cnc3c(ccc4cc(-c5ccc(C(F)(F)F)cc5)cc(O)c43)c2)cc1	-4.59118	HBQ deriv.
O=[N+]([O-])c1ccc(-c2cnc3c(ccc4cc(-c5ccc(C(F)(F)F)cc5)cc(O)c43)c2)cc1	-5.23823	HBQ deriv.
O=C(c1ccccc1)c1cnc2c(ccc3cc(-c4ccc(C(F)(F)F)cc4)cc(O)c32)c1	-7.4473	HBQ deriv.
N#Cc1ccc(-c2cnc3c(ccc4cc(-c5ccc(C(F)(F)F)cc5)cc(O)c43)c2)cc1	-5.63264	HBQ deriv.
Oc1cc(-c2ccc(C(F)(F)F)cc2)cc2ccc3cc(-c4ccc(C(F)(F)F)cc4)cnc3c12	-7.45378	HBQ deriv.
N#Cc1ccc(-c2ccc3oc(-c4ccc(-c5ccc(N(c6ccccc6)c6ccccc6)cc5)cc4)c(O)c(=O)c3c2)cc1	1.61355	3HF deriv.
O=c1c(O)c(-c2ccc(-c3ccc(N(c4ccccc4)c4ccccc4)cc3)cc2)oc2ccc(-c3ccc([N+](=O)[O-])cc3)cc12	7.45442	3HF deriv.
O=c1c(O)c(-c2ccc(-c3ccc(N(c4ccccc4)c4ccccc4)cc3)cc2)oc2ccc(-c3ccc(C(F)(F)F)cc3)cc12	1.49229	3HF deriv.
N#CC(C#N)=Cc1ccc(-c2ccc3oc(-c4ccc(-c5ccc(N(c6ccccc6)c6ccccc6)cc5)cc4)c(O)c(=O)c3c2)cc1	7.76401	3HF deriv.
O=C(c1ccccc1)c1ccc2oc(-c3ccc(-c4ccc(N(c5ccccc5)c5ccccc5)cc4)cc3)c(O)c(=O)c2c1	1.70081	3HF deriv.
[H]c1ccc2oc(-c3ccc(-c4ccc(N(c5ccccc5)c5ccccc5)cc4)cc3)c(O)c(=O)c2c1	1.18652	3HF deriv.
N#Cc1ccc(-c2ccc(-c3oc4ccc(-c5ccc(N(c6ccccc6)c6ccccc6)cc5)cc4c(=O)c3O)cc2)cc1	4.74425	3HF deriv.
O=c1c(O)c(-c2ccc(-c3ccc([N+](=O)[O-])cc3)cc2)oc2ccc(-c3ccc(N(c4ccccc4)c4ccccc4)cc3)cc12	8.90047	3HF deriv.
O=c1c(O)c(-c2ccc(-c3ccc(C(F)(F)F)cc3)cc2)oc2ccc(-c3ccc(N(c4ccccc4)c4ccccc4)cc3)cc12	4.18584	3HF deriv.
N#CC(C#N)=Cc1ccc(-c2ccc(-c3oc4ccc(-c5ccc(N(c6ccccc6)c6ccccc6)cc5)cc4c(=O)c3O)cc2)cc1	10.5992	3HF deriv.
O=C(c1ccccc1)c1ccc(-c2oc3ccc(-c4ccc(N(c5ccccc5)c5ccccc5)cc4)cc3c(=O)c2O)cc1	5.18027	3HF deriv.
[H]c1ccc(-c2oc3ccc(-c4ccc(N(c5ccccc5)c5ccccc5)cc4)cc3c(=O)c2O)cc1	3.29076	3HF deriv.
CCN(CC)c1ccc(-c2ccc(-c3oc4ccc(-c5ccc(C#N)cc5)cc4c(=O)c3O)cc2)cc1	1.8105	3HF deriv.
CCN(CC)c1ccc(-c2ccc(-c3oc4ccc(-c5ccc([N+](=O)[O-])cc5)cc4c(=O)c3O)cc2)cc1	6.47256	3HF deriv.
CCN(CC)c1ccc(-c2ccc(-c3oc4ccc(-c5ccc(C(F)(F)F)cc5)cc4c(=O)c3O)cc2)cc1	1.55569	3HF deriv.
CCN(CC)c1ccc(-c2ccc(-c3oc4ccc(-c5ccc(C=C(C#N)C#N)cc5)cc4c(=O)c3O)cc2)cc1	6.49841	3HF deriv.
CCN(CC)c1ccc(-c2ccc(-c3oc4ccc(C(=O)c5ccccc5)cc4c(=O)c3O)cc2)cc1	0.965053	3HF deriv.
[H]c1ccc2oc(-c3ccc(-c4ccc(N(CC)CC)cc4)cc3)c(O)c(=O)c2c1	0.624094	3HF deriv.
CCN(CC)c1ccc(-c2ccc3oc(-c4ccc(-c5ccc(C#N)cc5)cc4)c(O)c(=O)c3c2)cc1	5.98033	3HF deriv.
CCN(CC)c1ccc(-c2ccc3oc(-c4ccc(-c5ccc([N+](=O)[O-])cc5)cc4)c(O)c(=O)c3c2)cc1	10.9948	3HF deriv.
CCN(CC)c1ccc(-c2ccc3oc(-c4ccc(-c5ccc(C(F)(F)F)cc5)cc4)c(O)c(=O)c3c2)cc1	5.32336	3HF deriv.
CCN(CC)c1ccc(-c2ccc3oc(-c4ccc(-c5ccc(C=C(C#N)C#N)cc5)cc4)c(O)c(=O)c3c2)cc1	12.665	3HF deriv.
CCN(CC)c1ccc(-c2ccc3oc(-c4ccc(C(=O)c5ccccc5)cc4)c(O)c(=O)c3c2)cc1	6.55521	3HF deriv.
[H]c1ccc(-c2oc3ccc(-c4ccc(N(CC)CC)cc4)cc3c(=O)c2O)cc1	4.17676	3HF deriv.
COc1ccc(-c2ccc(-c3oc4ccc(-c5ccc(C#N)cc5)cc4c(=O)c3O)cc2)cc1	-3.32437	3HF deriv.
COc1ccc(-c2ccc(-c3oc4ccc(-c5ccc([N+](=O)[O-])cc5)cc4c(=O)c3O)cc2)cc1	0.96879	3HF deriv.
COc1ccc(-c2ccc(-c3oc4ccc(-c5ccc(C(F)(F)F)cc5)cc4c(=O)c3O)cc2)cc1	-3.57212	3HF deriv.
COc1ccc(-c2ccc(-c3oc4ccc(-c5ccc(C=C(C#N)C#N)cc5)cc4c(=O)c3O)cc2)cc1	1.20853	3HF deriv.
COc1ccc(-c2ccc(-c3oc4ccc(C(=O)c5ccccc5)cc4c(=O)c3O)cc2)cc1	-3.95552	3HF deriv.
[H]c1ccc2oc(-c3ccc(-c4ccc(OC)cc4)cc3)c(O)c(=O)c2c1	-4.5032	3HF deriv.
COc1ccc(-c2ccc3oc(-c4ccc(-c5ccc(C#N)cc5)cc4)c(O)c(=O)c3c2)cc1	0.406037	3HF deriv.
COc1ccc(-c2ccc3oc(-c4ccc(-c5ccc([N+](=O)[O-])cc5)cc4)c(O)c(=O)c3c2)cc1	3.90248	3HF deriv.
COc1ccc(-c2ccc3oc(-c4ccc(-c5ccc(C(F)(F)F)cc5)cc4)c(O)c(=O)c3c2)cc1	-0.463797	3HF deriv.
COc1ccc(-c2ccc3oc(-c4ccc(-c5ccc(C=C(C#N)C#N)cc5)cc4)c(O)c(=O)c3c2)cc1	4.58786	3HF deriv.
COc1ccc(-c2ccc3oc(-c4ccc(C(=O)c5ccccc5)cc4)c(O)c(=O)c3c2)cc1	1.98017	3HF deriv.
[H]c1ccc(-c2oc3ccc(-c4ccc(OC)cc4)cc3c(=O)c2O)cc1	-1.72719	3HF deriv.
CN(C)c1ccc(-c2ccc(-c3oc4ccc(-c5ccc(C#N)cc5)cc4c(=O)c3O)cc2)cc1	1.56225	3HF deriv.
CN(C)c1ccc(-c2ccc(-c3oc4ccc(-c5ccc([N+](=O)[O-])cc5)cc4c(=O)c3O)cc2)cc1	6.02937	3HF deriv.
CN(C)c1ccc(-c2ccc(-c3oc4ccc(-c5ccc(C(F)(F)F)cc5)cc4c(=O)c3O)cc2)cc1	1.26319	3HF deriv.
CN(C)c1ccc(-c2ccc(-c3oc4ccc(-c5ccc(C=C(C#N)C#N)cc5)cc4c(=O)c3O)cc2)cc1	6.05146	3HF deriv.
CN(C)c1ccc(-c2ccc(-c3oc4ccc(C(=O)c5ccccc5)cc4c(=O)c3O)cc2)cc1	0.696371	3HF deriv.
[H]c1ccc2oc(-c3ccc(-c4ccc(N(C)C)cc4)cc3)c(O)c(=O)c2c1	0.348212	3HF deriv.
CN(C)c1ccc(-c2ccc3oc(-c4ccc(-c5ccc(C#N)cc5)cc4)c(O)c(=O)c3c2)cc1	6.03593	3HF deriv.
CN(C)c1ccc(-c2ccc3oc(-c4ccc(-c5ccc([N+](=O)[O-])cc5)cc4)c(O)c(=O)c3c2)cc1	10.9519	3HF deriv.
CN(C)c1ccc(-c2ccc3oc(-c4ccc(-c5ccc(C(F)(F)F)cc5)cc4)c(O)c(=O)c3c2)cc1	5.36686	3HF deriv.
CN(C)c1ccc(-c2ccc3oc(-c4ccc(-c5ccc(C=C(C#N)C#N)cc5)cc4)c(O)c(=O)c3c2)cc1	12.645	3HF deriv.
CN(C)c1ccc(-c2ccc3oc(-c4ccc(C(=O)c5ccccc5)cc4)c(O)c(=O)c3c2)cc1	6.59936	3HF deriv.
[H]c1ccc(-c2oc3ccc(-c4ccc(N(C)C)cc4)cc3c(=O)c2O)cc1	4.21077	3HF deriv.
Cc1cc(-c2ccc(-c3oc4ccc(-c5ccc(C#N)cc5)cc4c(=O)c3O)cc2)cc(C)c1C	-4.44622	3HF deriv.
Cc1cc(-c2ccc(-c3oc4ccc(-c5ccc([N+](=O)[O-])cc5)cc4c(=O)c3O)cc2)cc(C)c1C	-0.213331	3HF deriv.
Cc1cc(-c2ccc(-c3oc4ccc(-c5ccc(C(F)(F)F)cc5)cc4c(=O)c3O)cc2)cc(C)c1C	-4.73506	3HF deriv.
Cc1cc(-c2ccc(-c3oc4ccc(-c5ccc(C=C(C#N)C#N)cc5)cc4c(=O)c3O)cc2)cc(C)c1C	-0.158261	3HF deriv.
Cc1cc(-c2ccc(-c3oc4ccc(C(=O)c5ccccc5)cc4c(=O)c3O)cc2)cc(C)c1C	-4.86129	3HF deriv.
[H]c1ccc2oc(-c3ccc(-c4cc(C)c(C)c(C)c4)cc3)c(O)c(=O)c2c1	-5.50294	3HF deriv.
Cc1cc(-c2ccc3oc(-c4ccc(-c5ccc(C#N)cc5)cc4)c(O)c(=O)c3c2)cc(C)c1C	-2.72185	3HF deriv.
Cc1cc(-c2ccc3oc(-c4ccc(-c5ccc([N+](=O)[O-])cc5)cc4)c(O)c(=O)c3c2)cc(C)c1C	0.61035	3HF deriv.
Cc1cc(-c2ccc3oc(-c4ccc(-c5ccc(C(F)(F)F)cc5)cc4)c(O)c(=O)c3c2)cc(C)c1C	-3.57226	3HF deriv.
Cc1cc(-c2ccc3oc(-c4ccc(-c5ccc(C=C(C#N)C#N)cc5)cc4)c(O)c(=O)c3c2)cc(C)c1C	0.0022653	3HF deriv.
Cc1cc(-c2ccc3oc(-c4ccc(C(=O)c5ccccc5)cc4)c(O)c(=O)c3c2)cc(C)c1C	-0.00176443	3HF deriv.
[H]c1ccc(-c2oc3ccc(-c4cc(C)c(C)c(C)c4)cc3c(=O)c2O)cc1	-4.77967	3HF deriv.
[H]c1ccc(-c2oc3ccc(-c4ccc(C#N)cc4)cc3c(=O)c2O)cc1	-8.81231	3HF deriv.
[H]c1ccc(-c2oc3ccc(-c4ccc([N+](=O)[O-])cc4)cc3c(=O)c2O)cc1	-2.79837	3HF deriv.
[H]c1ccc(-c2oc3ccc(-c4ccc(C(F)(F)F)cc4)cc3c(=O)c2O)cc1	-9.078	3HF deriv.
[H]c1ccc(-c2oc3ccc(-c4ccc(C=C(C#N)C#N)cc4)cc3c(=O)c2O)cc1	-2.71485	3HF deriv.
[H]c1ccc(-c2oc3ccc(C(=O)c4ccccc4)cc3c(=O)c2O)cc1	-6.97491	3HF deriv.
[H]c1ccc(-c2oc3ccc([H])cc3c(=O)c2O)cc1	-9.58314	3HF deriv.
[H]c1ccc2oc(-c3ccc(-c4ccc(C#N)cc4)cc3)c(O)c(=O)c2c1	-7.1137	3HF deriv.
[H]c1ccc2oc(-c3ccc(-c4ccc([N+](=O)[O-])cc4)cc3)c(O)c(=O)c2c1	-2.07396	3HF deriv.
[H]c1ccc2oc(-c3ccc(-c4ccc(C(F)(F)F)cc4)cc3)c(O)c(=O)c2c1	-7.83791	3HF deriv.
[H]c1ccc2oc(-c3ccc(-c4ccc(C=C(C#N)C#N)cc4)cc3)c(O)c(=O)c2c1	-1.13534	3HF deriv.
[H]c1ccc2oc(-c3ccc(C(=O)c4ccccc4)cc3)c(O)c(=O)c2c1	-8.1757	3HF deriv.
CCN(CC)c1ccc(-c2ccc(-c3oc4ccc(-c5ccc(N(CC)CC)cc5)cc4c(=O)c3O)cc2)cc1	2.81826	3HF deriv.
CCN(CC)c1ccc(-c2ccc(-c3oc4ccc(-c5ccc(N(C)C)cc5)cc4c(=O)c3O)cc2)cc1	1.78631	3HF deriv.
CCN(CC)c1ccc(-c2ccc(-c3oc4ccc(-c5ccc(N(c6ccccc6)c6ccccc6)cc5)cc4c(=O)c3O)cc2)cc1	1.80015	3HF deriv.
CCN(CC)c1ccc(-c2ccc(-c3oc4ccc(-c5cc(C)c(C)c(C)c5)cc4c(=O)c3O)cc2)cc1	0.0143516	3HF deriv.
CCN(CC)c1ccc(-c2ccc(-c3oc4ccc(-c5ccc(OC)cc5)cc4c(=O)c3O)cc2)cc1	0.258791	3HF deriv.
CCN(CC)c1ccc(-c2ccc3oc(-c4ccc(-c5ccc(N(C)C)cc5)cc4)c(O)c(=O)c3c2)cc1	2.10779	3HF deriv.
CN(C)c1ccc(-c2ccc(-c3oc4ccc(-c5ccc(N(C)C)cc5)cc4c(=O)c3O)cc2)cc1	2.54502	3HF deriv.
CN(C)c1ccc(-c2ccc(-c3oc4ccc(-c5ccc(N(c6ccccc6)c6ccccc6)cc5)cc4c(=O)c3O)cc2)cc1	3.15326	3HF deriv.
Cc1cc(-c2ccc3oc(-c4ccc(-c5ccc(N(C)C)cc5)cc4)c(O)c(=O)c3c2)cc(C)c1C	-0.266735	3HF deriv.
COc1ccc(-c2ccc3oc(-c4ccc(-c5ccc(N(C)C)cc5)cc4)c(O)c(=O)c3c2)cc1	-0.0356922	3HF deriv.
CCN(CC)c1ccc(-c2ccc3oc(-c4ccc(-c5ccc(N(c6ccccc6)c6ccccc6)cc5)cc4)c(O)c(=O)c3c2)cc1	3.34772	3HF deriv.
CN(C)c1ccc(-c2ccc3oc(-c4ccc(-c5ccc(N(c6ccccc6)c6ccccc6)cc5)cc4)c(O)c(=O)c3c2)cc1	2.32052	3HF deriv.
O=c1c(O)c(-c2ccc(-c3ccc(N(c4ccccc4)c4ccccc4)cc3)cc2)oc2ccc(-c3ccc(N(c4ccccc4)c4ccccc4)cc3)cc12	2.57273	3HF deriv.
Cc1cc(-c2ccc3oc(-c4ccc(-c5ccc(N(c6ccccc6)c6ccccc6)cc5)cc4)c(O)c(=O)c3c2)cc(C)c1C	1.2927	3HF deriv.
COc1ccc(-c2ccc3oc(-c4ccc(-c5ccc(N(c6ccccc6)c6ccccc6)cc5)cc4)c(O)c(=O)c3c2)cc1	1.30312	3HF deriv.
CCN(CC)c1ccc(-c2ccc3oc(-c4ccc(-c5cc(C)c(C)c(C)c5)cc4)c(O)c(=O)c3c2)cc1	4.476	3HF deriv.
Cc1cc(-c2ccc(-c3oc4ccc(-c5ccc(N(C)C)cc5)cc4c(=O)c3O)cc2)cc(C)c1C	4.44018	3HF deriv.
Cc1cc(-c2ccc(-c3oc4ccc(-c5ccc(N(c6ccccc6)c6ccccc6)cc5)cc4c(=O)c3O)cc2)cc(C)c1C	3.52882	3HF deriv.
Cc1cc(-c2ccc(-c3oc4ccc(-c5cc(C)c(C)c(C)c5)cc4c(=O)c3O)cc2)cc(C)c1C	-5.98967	3HF deriv.
COc1ccc(-c2ccc3oc(-c4ccc(-c5cc(C)c(C)c(C)c5)cc4)c(O)c(=O)c3c2)cc1	-5.84967	3HF deriv.
CCN(CC)c1ccc(-c2ccc3oc(-c4ccc(-c5ccc(OC)cc5)cc4)c(O)c(=O)c3c2)cc1	4.36385	3HF deriv.
COc1ccc(-c2ccc(-c3oc4ccc(-c5ccc(N(C)C)cc5)cc4c(=O)c3O)cc2)cc1	4.38871	3HF deriv.
COc1ccc(-c2ccc(-c3oc4ccc(-c5ccc(N(c6ccccc6)c6ccccc6)cc5)cc4c(=O)c3O)cc2)cc1	3.39522	3HF deriv.
COc1ccc(-c2ccc(-c3oc4ccc(-c5cc(C)c(C)c(C)c5)cc4c(=O)c3O)cc2)cc1	-6.98966	3HF deriv.
COc1ccc(-c2ccc(-c3oc4ccc(-c5ccc(OC)cc5)cc4c(=O)c3O)cc2)cc1	-4.11637	3HF deriv.
N#CC(C#N)=Cc1ccc(-c2ccc(-c3oc4ccc(-c5ccc(C=C(C#N)C#N)cc5)cc4c(=O)c3O)cc2)cc1	-4.47987	3HF deriv.
N#CC(C#N)=Cc1ccc(-c2ccc(-c3oc4ccc(-c5ccc([N+](=O)[O-])cc5)cc4c(=O)c3O)cc2)cc1	-1.88979	3HF deriv.
N#CC(C#N)=Cc1ccc(-c2ccc(-c3oc4ccc(C(=O)c5ccccc5)cc4c(=O)c3O)cc2)cc1	-1.82126	3HF deriv.
N#CC(C#N)=Cc1ccc(-c2ccc(-c3oc4ccc(-c5ccc(C#N)cc5)cc4c(=O)c3O)cc2)cc1	-1.6904	3HF deriv.
N#CC(C#N)=Cc1ccc(-c2ccc(-c3oc4ccc(-c5ccc(C(F)(F)F)cc5)cc4c(=O)c3O)cc2)cc1	-1.52909	3HF deriv.
N#CC(C#N)=Cc1ccc(-c2ccc3oc(-c4ccc(-c5ccc([N+](=O)[O-])cc5)cc4)c(O)c(=O)c3c2)cc1	-3.12781	3HF deriv.
O=c1c(O)c(-c2ccc(-c3ccc([N+](=O)[O-])cc3)cc2)oc2ccc(-c3ccc([N+](=O)[O-])cc3)cc12	-5.14201	3HF deriv.
O=C(c1ccccc1)c1ccc2oc(-c3ccc(-c4ccc([N+](=O)[O-])cc4)cc3)c(O)c(=O)c2c1	-3.13489	3HF deriv.
N#Cc1ccc(-c2ccc3oc(-c4ccc(-c5ccc([N+](=O)[O-])cc5)cc4)c(O)c(=O)c3c2)cc1	-2.87944	3HF deriv.
O=c1c(O)c(-c2ccc(-c3ccc([N+](=O)[O-])cc3)cc2)oc2ccc(-c3ccc(C(F)(F)F)cc3)cc12	-2.98839	3HF deriv.
N#CC(C#N)=Cc1ccc(-c2ccc3oc(-c4ccc(C(=O)c5ccccc5)cc4)c(O)c(=O)c3c2)cc1	-3.0035	3HF deriv.
O=C(c1ccccc1)c1ccc(-c2oc3ccc(-c4ccc([N+](=O)[O-])cc4)cc3c(=O)c2O)cc1	-11.1757	3HF deriv.
O=C(c1ccccc1)c1ccc(-c2oc3ccc(C(=O)c4ccccc4)cc3c(=O)c2O)cc1	-7.17977	3HF deriv.
N#Cc1ccc(-c2ccc3oc(-c4ccc(C(=O)c5ccccc5)cc4)c(O)c(=O)c3c2)cc1	-0.733566	3HF deriv.
O=C(c1ccccc1)c1ccc(-c2oc3ccc(-c4ccc(C(F)(F)F)cc4)cc3c(=O)c2O)cc1	-0.941132	3HF deriv.
N#CC(C#N)=Cc1ccc(-c2ccc3oc(-c4ccc(-c5ccc(C#N)cc5)cc4)c(O)c(=O)c3c2)cc1	-2.74232	3HF deriv.
N#Cc1ccc(-c2ccc(-c3oc4ccc(-c5ccc([N+](=O)[O-])cc5)cc4c(=O)c3O)cc2)cc1	-2.88439	3HF deriv.
N#Cc1ccc(-c2ccc(-c3oc4ccc(C(=O)c5ccccc5)cc4c(=O)c3O)cc2)cc1	-7.93588	3HF deriv.
N#Cc1ccc(-c2ccc(-c3oc4ccc(-c5ccc(C#N)cc5)cc4c(=O)c3O)cc2)cc1	-6.99585	3HF deriv.
N#Cc1ccc(-c2ccc(-c3oc4ccc(-c5ccc(C(F)(F)F)cc5)cc4c(=O)c3O)cc2)cc1	-6.10672	3HF deriv.
N#CC(C#N)=Cc1ccc(-c2ccc3oc(-c4ccc(-c5ccc(C(F)(F)F)cc5)cc4)c(O)c(=O)c3c2)cc1	-2.55559	3HF deriv.
O=c1c(O)c(-c2ccc(-c3ccc(C(F)(F)F)cc3)cc2)oc2ccc(-c3ccc([N+](=O)[O-])cc3)cc12	-2.69219	3HF deriv.
O=C(c1ccccc1)c1ccc2oc(-c3ccc(-c4ccc(C(F)(F)F)cc4)cc3)c(O)c(=O)c2c1	-7.68986	3HF deriv.
N#Cc1ccc(-c2ccc3oc(-c4ccc(-c5ccc(C(F)(F)F)cc5)cc4)c(O)c(=O)c3c2)cc1	-7.46509	3HF deriv.
O=c1c(O)c(-c2ccc(-c3ccc(C(F)(F)F)cc3)cc2)oc2ccc(-c3ccc(C(F)(F)F)cc3)cc12	-7.58588	3HF deriv.
N#CC(C#N)=Cc1ccc(-c2ccc3c(c2)C(=O)c2cc(-c4ccc(C=C(C#N)C#N)cc4)cc(O)c2C3=O)cc1	1.69729	HAQ deriv.
N#CC(C#N)=Cc1ccc(-c2cc(O)c3c(c2)C(=O)c2cc(-c4ccc([N+](=O)[O-])cc4)ccc2C3=O)cc1	1.68513	HAQ deriv.
N#CC(C#N)=Cc1ccc(-c2cc(O)c3c(c2)C(=O)c2cc(C(=O)c4ccccc4)ccc2C3=O)cc1	1.58744	HAQ deriv.
N#CC(C#N)=Cc1ccc(-c2cc(O)c3c(c2)C(=O)c2cc(-c4ccc(C#N)cc4)ccc2C3=O)cc1	1.45091	HAQ deriv.
N#CC(C#N)=Cc1ccc(-c2cc(O)c3c(c2)C(=O)c2cc(-c4ccc(C(F)(F)F)cc4)ccc2C3=O)cc1	1.36183	HAQ deriv.
CCN(CC)c1ccc(-c2ccc3c(c2)C(=O)c2cc(-c4ccc(C=C(C#N)C#N)cc4)cc(O)c2C3=O)cc1	5.3335	HAQ deriv.
CN(C)c1ccc(-c2ccc3c(c2)C(=O)c2cc(-c4ccc(C=C(C#N)C#N)cc4)cc(O)c2C3=O)cc1	5.34741	HAQ deriv.
N#CC(C#N)=Cc1ccc(-c2cc(O)c3c(c2)C(=O)c2cc(-c4ccc(N(c5ccccc5)c5ccccc5)cc4)ccc2C3=O)cc1	5.50634	HAQ deriv.
Cc1cc(-c2ccc3c(c2)C(=O)c2cc(-c4ccc(C=C(C#N)C#N)cc4)cc(O)c2C3=O)cc(C)c1C	4.62156	HAQ deriv.
COc1ccc(-c2ccc3c(c2)C(=O)c2cc(-c4ccc(C=C(C#N)C#N)cc4)cc(O)c2C3=O)cc1	5.73426	HAQ deriv.
[H]c1ccc2c(c1)C(=O)c1cc(-c3ccc(C=C(C#N)C#N)cc3)cc(O)c1C2=O	1.24925	HAQ deriv.
N#CC(C#N)=Cc1ccc(-c2ccc3c(c2)C(=O)c2cc(-c4ccc([N+](=O)[O-])cc4)cc(O)c2C3=O)cc1	0.991719	HAQ deriv.
O=C1c2cc(-c3ccc([N+](=O)[O-])cc3)ccc2C(=O)c2c(O)cc(-c3ccc([N+](=O)[O-])cc3)cc21	0.938618	HAQ deriv.
O=C(c1ccccc1)c1ccc2c(c1)C(=O)c1cc(-c3ccc([N+](=O)[O-])cc3)cc(O)c1C2=O	-0.285527	HAQ deriv.
N#Cc1ccc(-c2ccc3c(c2)C(=O)c2cc(-c4ccc([N+](=O)[O-])cc4)cc(O)c2C3=O)cc1	0.758446	HAQ deriv.
O=C1c2cc(-c3ccc(C(F)(F)F)cc3)ccc2C(=O)c2c(O)cc(-c3ccc([N+](=O)[O-])cc3)cc21	0.571287	HAQ deriv.
CCN(CC)c1ccc(-c2ccc3c(c2)C(=O)c2cc(-c4ccc([N+](=O)[O-])cc4)cc(O)c2C3=O)cc1	5.03354	HAQ deriv.
CN(C)c1ccc(-c2ccc3c(c2)C(=O)c2cc(-c4ccc([N+](=O)[O-])cc4)cc(O)c2C3=O)cc1	5.05638	HAQ deriv.
Cc1cc(-c2ccc3c(c2)C(=O)c2cc(-c4ccc([N+](=O)[O-])cc4)cc(O)c2C3=O)cc(C)c1C	4.40468	HAQ deriv.
COc1ccc(-c2ccc3c(c2)C(=O)c2cc(-c4ccc([N+](=O)[O-])cc4)cc(O)c2C3=O)cc1	5.43785	HAQ deriv.
[H]c1ccc2c(c1)C(=O)c1cc(-c3ccc([N+](=O)[O-])cc3)cc(O)c1C2=O	0.0981109	HAQ deriv.
N#CC(C#N)=Cc1ccc(-c2ccc3c(c2)C(=O)c2cc(C(=O)c4ccccc4)cc(O)c2C3=O)cc1	1.13119	HAQ deriv.
O=C(c1ccccc1)c1cc(O)c2c(c1)C(=O)c1cc(-c3ccc([N+](=O)[O-])cc3)ccc1C2=O	4.98322	HAQ deriv.
O=C(c1ccccc1)c1ccc2c(c1)C(=O)c1cc(C(=O)c3ccccc3)cc(O)c1C2=O	1.66254	HAQ deriv.
N#Cc1ccc(-c2ccc3c(c2)C(=O)c2cc(C(=O)c4ccccc4)cc(O)c2C3=O)cc1	0.860499	HAQ deriv.
O=C(c1ccccc1)c1cc(O)c2c(c1)C(=O)c1cc(-c3ccc(C(F)(F)F)cc3)ccc1C2=O	4.64118	HAQ deriv.
Cc1cc(-c2ccc3c(c2)C(=O)c2cc(C(=O)c4ccccc4)cc(O)c2C3=O)cc(C)c1C	4.03243	HAQ deriv.
COc1ccc(-c2ccc3c(c2)C(=O)c2cc(C(=O)c4ccccc4)cc(O)c2C3=O)cc1	6.01408	HAQ deriv.
[H]c1ccc2c(c1)C(=O)c1cc(C(=O)c3ccccc3)cc(O)c1C2=O	1.19963	HAQ deriv.
N#CC(C#N)=Cc1ccc(-c2ccc3c(c2)C(=O)c2cc(-c4ccc(C#N)cc4)cc(O)c2C3=O)cc1	1.33906	HAQ deriv.
N#Cc1ccc(-c2cc(O)c3c(c2)C(=O)c2cc(-c4ccc([N+](=O)[O-])cc4)ccc2C3=O)cc1	1.29138	HAQ deriv.
N#Cc1ccc(-c2cc(O)c3c(c2)C(=O)c2cc(C(=O)c4ccccc4)ccc2C3=O)cc1	-0.345749	HAQ deriv.
N#Cc1ccc(-c2ccc3c(c2)C(=O)c2cc(-c4ccc(C#N)cc4)cc(O)c2C3=O)cc1	1.13725	HAQ deriv.
N#Cc1ccc(-c2cc(O)c3c(c2)C(=O)c2cc(-c4ccc(C(F)(F)F)cc4)ccc2C3=O)cc1	0.912288	HAQ deriv.
CCN(CC)c1ccc(-c2ccc3c(c2)C(=O)c2cc(-c4ccc(C#N)cc4)cc(O)c2C3=O)cc1	4.91621	HAQ deriv.
CN(C)c1ccc(-c2ccc3c(c2)C(=O)c2cc(-c4ccc(C#N)cc4)cc(O)c2C3=O)cc1	4.93468	HAQ deriv.
N#Cc1ccc(-c2cc(O)c3c(c2)C(=O)c2cc(-c4ccc(N(c5ccccc5)c5ccccc5)cc4)ccc2C3=O)cc1	4.93452	HAQ deriv.
Cc1cc(-c2ccc3c(c2)C(=O)c2cc(-c4ccc(C#N)cc4)cc(O)c2C3=O)cc(C)c1C	4.09224	HAQ deriv.
COc1ccc(-c2ccc3c(c2)C(=O)c2cc(-c4ccc(C#N)cc4)cc(O)c2C3=O)cc1	5.16059	HAQ deriv.
[H]c1ccc2c(c1)C(=O)c1cc(-c3ccc(C#N)cc3)cc(O)c1C2=O	0.114932	HAQ deriv.
N#CC(C#N)=Cc1ccc(-c2ccc3c(c2)C(=O)c2cc(-c4ccc(C(F)(F)F)cc4)cc(O)c2C3=O)cc1	1.3634	HAQ deriv.
O=C1c2cc(-c3ccc([N+](=O)[O-])cc3)ccc2C(=O)c2c(O)cc(-c3ccc(C(F)(F)F)cc3)cc21	1.30737	HAQ deriv.
O=C(c1ccccc1)c1ccc2c(c1)C(=O)c1cc(-c3ccc(C(F)(F)F)cc3)cc(O)c1C2=O	1.43439	HAQ deriv.
N#Cc1ccc(-c2ccc3c(c2)C(=O)c2cc(-c4ccc(C(F)(F)F)cc4)cc(O)c2C3=O)cc1	1.13986	HAQ deriv.
O=C1c2cc(-c3ccc(C(F)(F)F)cc3)ccc2C(=O)c2c(O)cc(-c3ccc(C(F)(F)F)cc3)cc21	0.945995	HAQ deriv.
CCN(CC)c1ccc(-c2ccc3c(c2)C(=O)c2cc(-c4ccc(C(F)(F)F)cc4)cc(O)c2C3=O)cc1	4.89858	HAQ deriv.
CN(C)c1ccc(-c2ccc3c(c2)C(=O)c2cc(-c4ccc(C(F)(F)F)cc4)cc(O)c2C3=O)cc1	4.92539	HAQ deriv.
O=C1c2cc(-c3ccc(N(c4ccccc4)c4ccccc4)cc3)ccc2C(=O)c2c(O)cc(-c3ccc(C(F)(F)F)cc3)cc21	5.12873	HAQ deriv.
Cc1cc(-c2ccc3c(c2)C(=O)c2cc(-c4ccc(C(F)(F)F)cc4)cc(O)c2C3=O)cc(C)c1C	3.88844	HAQ deriv.
COc1ccc(-c2ccc3c(c2)C(=O)c2cc(-c4ccc(C(F)(F)F)cc4)cc(O)c2C3=O)cc1	5.03528	HAQ deriv.
[H]c1ccc2c(c1)C(=O)c1cc(-c3ccc(C(F)(F)F)cc3)cc(O)c1C2=O	0.138075	HAQ deriv.
CCN(CC)c1ccc(-c2cc(O)c3c(c2)C(=O)c2cc(-c4ccc(C=C(C#N)C#N)cc4)ccc2C3=O)cc1	3.92383	HAQ deriv.
CCN(CC)c1ccc(-c2cc(O)c3c(c2)C(=O)c2cc(-c4ccc([N+](=O)[O-])cc4)ccc2C3=O)cc1	3.58945	HAQ deriv.
CCN(CC)c1ccc(-c2cc(O)c3c(c2)C(=O)c2cc(C(=O)c4ccccc4)ccc2C3=O)cc1	3.35256	HAQ deriv.
CCN(CC)c1ccc(-c2cc(O)c3c(c2)C(=O)c2cc(-c4ccc(C#N)cc4)ccc2C3=O)cc1	3.40044	HAQ deriv.
CCN(CC)c1ccc(-c2cc(O)c3c(c2)C(=O)c2cc(-c4ccc(C(F)(F)F)cc4)ccc2C3=O)cc1	3.36007	HAQ deriv.
CCN(CC)c1ccc(-c2ccc3c(c2)C(=O)c2cc(-c4ccc(N(CC)CC)cc4)cc(O)c2C3=O)cc1	2.31586	HAQ deriv.
CCN(CC)c1ccc(-c2cc(O)c3c(c2)C(=O)c2cc(-c4ccc(N(C)C)cc4)ccc2C3=O)cc1	2.78977	HAQ deriv.
CCN(CC)c1ccc(-c2cc(O)c3c(c2)C(=O)c2cc(-c4ccc(N(c5ccccc5)c5ccccc5)cc4)ccc2C3=O)cc1	3.02418	HAQ deriv.
CCN(CC)c1ccc(-c2cc(O)c3c(c2)C(=O)c2cc(-c4cc(C)c(C)c(C)c4)ccc2C3=O)cc1	2.9079	HAQ deriv.
CCN(CC)c1ccc(-c2cc(O)c3c(c2)C(=O)c2cc(-c4ccc(OC)cc4)ccc2C3=O)cc1	2.94067	HAQ deriv.
[H]c1ccc2c(c1)C(=O)c1cc(-c3ccc(N(CC)CC)cc3)cc(O)c1C2=O	3.16463	HAQ deriv.
CN(C)c1ccc(-c2cc(O)c3c(c2)C(=O)c2cc(-c4ccc(C=C(C#N)C#N)cc4)ccc2C3=O)cc1	3.90826	HAQ deriv.
CN(C)c1ccc(-c2cc(O)c3c(c2)C(=O)c2cc(-c4ccc([N+](=O)[O-])cc4)ccc2C3=O)cc1	3.51731	HAQ deriv.
CN(C)c1ccc(-c2cc(O)c3c(c2)C(=O)c2cc(C(=O)c4ccccc4)ccc2C3=O)cc1	3.32163	HAQ deriv.
CN(C)c1ccc(-c2cc(O)c3c(c2)C(=O)c2cc(-c4ccc(C#N)cc4)ccc2C3=O)cc1	3.36943	HAQ deriv.
CN(C)c1ccc(-c2cc(O)c3c(c2)C(=O)c2cc(-c4ccc(C(F)(F)F)cc4)ccc2C3=O)cc1	3.32874	HAQ deriv.
CCN(CC)c1ccc(-c2ccc3c(c2)C(=O)c2cc(-c4ccc(N(C)C)cc4)cc(O)c2C3=O)cc1	2.75909	HAQ deriv.
CN(C)c1ccc(-c2ccc3c(c2)C(=O)c2cc(-c4ccc(N(C)C)cc4)cc(O)c2C3=O)cc1	2.79122	HAQ deriv.
CN(C)c1ccc(-c2cc(O)c3c(c2)C(=O)c2cc(-c4ccc(N(c5ccccc5)c5ccccc5)cc4)ccc2C3=O)cc1	5.07093	HAQ deriv.
Cc1cc(-c2ccc3c(c2)C(=O)c2cc(-c4ccc(N(C)C)cc4)cc(O)c2C3=O)cc(C)c1C	2.91343	HAQ deriv.
COc1ccc(-c2ccc3c(c2)C(=O)c2cc(-c4ccc(N(C)C)cc4)cc(O)c2C3=O)cc1	2.99665	HAQ deriv.
[H]c1ccc2c(c1)C(=O)c1cc(-c3ccc(N(C)C)cc3)cc(O)c1C2=O	3.13335	HAQ deriv.
N#CC(C#N)=Cc1ccc(-c2ccc3c(c2)C(=O)c2cc(-c4ccc(N(c5ccccc5)c5ccccc5)cc4)cc(O)c2C3=O)cc1	3.89903	HAQ deriv.
O=C1c2cc(-c3ccc([N+](=O)[O-])cc3)ccc2C(=O)c2c(O)cc(-c3ccc(N(c4ccccc4)c4ccccc4)cc3)cc21	3.79571	HAQ deriv.
O=C(c1ccccc1)c1ccc2c(c1)C(=O)c1cc(-c3ccc(N(c4ccccc4)c4ccccc4)cc3)cc(O)c1C2=O	3.29611	HAQ deriv.
N#Cc1ccc(-c2ccc3c(c2)C(=O)c2cc(-c4ccc(N(c5ccccc5)c5ccccc5)cc4)cc(O)c2C3=O)cc1	3.48223	HAQ deriv.
CCN(CC)c1ccc(-c2ccc3c(c2)C(=O)c2cc(-c4ccc(N(c5ccccc5)c5ccccc5)cc4)cc(O)c2C3=O)cc1	3.42775	HAQ deriv.
CN(C)c1ccc(-c2ccc3c(c2)C(=O)c2cc(-c4ccc(N(c5ccccc5)c5ccccc5)cc4)cc(O)c2C3=O)cc1	3.44356	HAQ deriv.
O=C1c2cc(-c3ccc(N(c4ccccc4)c4ccccc4)cc3)ccc2C(=O)c2c(O)cc(-c3ccc(N(c4ccccc4)c4ccccc4)cc3)cc21	3.65088	HAQ deriv.
Cc1cc(-c2ccc3c(c2)C(=O)c2cc(-c4ccc(N(c5ccccc5)c5ccccc5)cc4)cc(O)c2C3=O)cc(C)c1C	3.52541	HAQ deriv.
COc1ccc(-c2ccc3c(c2)C(=O)c2cc(-c4ccc(N(c5ccccc5)c5ccccc5)cc4)cc(O)c2C3=O)cc1	3.53953	HAQ deriv.
[H]c1ccc2c(c1)C(=O)c1cc(-c3ccc(N(c4ccccc4)c4ccccc4)cc3)cc(O)c1C2=O	3.33002	HAQ deriv.
Cc1cc(-c2cc(O)c3c(c2)C(=O)c2cc(-c4ccc(C=C(C#N)C#N)cc4)ccc2C3=O)cc(C)c1C	5.27694	HAQ deriv.
Cc1cc(-c2cc(O)c3c(c2)C(=O)c2cc(-c4ccc([N+](=O)[O-])cc4)ccc2C3=O)cc(C)c1C	4.92	HAQ deriv.
Cc1cc(-c2cc(O)c3c(c2)C(=O)c2cc(C(=O)c4ccccc4)ccc2C3=O)cc(C)c1C	4.38458	HAQ deriv.
Cc1cc(-c2cc(O)c3c(c2)C(=O)c2cc(-c4ccc(C#N)cc4)ccc2C3=O)cc(C)c1C	4.87428	HAQ deriv.
Cc1cc(-c2cc(O)c3c(c2)C(=O)c2cc(-c4ccc(C(F)(F)F)cc4)ccc2C3=O)cc(C)c1C	4.82865	HAQ deriv.
CCN(CC)c1ccc(-c2ccc3c(c2)C(=O)c2cc(-c4cc(C)c(C)c(C)c4)cc(O)c2C3=O)cc1	4.97524	HAQ deriv.
Cc1cc(-c2cc(O)c3c(c2)C(=O)c2cc(-c4ccc(N(C)C)cc4)ccc2C3=O)cc(C)c1C	4.70632	HAQ deriv.
Cc1cc(-c2cc(O)c3c(c2)C(=O)c2cc(-c4ccc(N(c5ccccc5)c5ccccc5)cc4)ccc2C3=O)cc(C)c1C	5.07185	HAQ deriv.
Cc1cc(-c2ccc3c(c2)C(=O)c2cc(-c4cc(C)c(C)c(C)c4)cc(O)c2C3=O)cc(C)c1C	3.67846	HAQ deriv.
COc1ccc(-c2ccc3c(c2)C(=O)c2cc(-c4cc(C)c(C)c(C)c4)cc(O)c2C3=O)cc1	4.20852	HAQ deriv.
[H]c1ccc2c(c1)C(=O)c1cc(-c3cc(C)c(C)c(C)c3)cc(O)c1C2=O	4.35734	HAQ deriv.
COc1ccc(-c2cc(O)c3c(c2)C(=O)c2cc(-c4ccc(C=C(C#N)C#N)cc4)ccc2C3=O)cc1	5.02993	HAQ deriv.
COc1ccc(-c2cc(O)c3c(c2)C(=O)c2cc(-c4ccc([N+](=O)[O-])cc4)ccc2C3=O)cc1	4.53876	HAQ deriv.
COc1ccc(-c2cc(O)c3c(c2)C(=O)c2cc(C(=O)c4ccccc4)ccc2C3=O)cc1	4.18851	HAQ deriv.
COc1ccc(-c2cc(O)c3c(c2)C(=O)c2cc(-c4ccc(C#N)cc4)ccc2C3=O)cc1	4.4428	HAQ deriv.
COc1ccc(-c2cc(O)c3c(c2)C(=O)c2cc(-c4ccc(C(F)(F)F)cc4)ccc2C3=O)cc1	4.37372	HAQ deriv.
CCN(CC)c1ccc(-c2ccc3c(c2)C(=O)c2cc(-c4ccc(OC)cc4)cc(O)c2C3=O)cc1	4.93226	HAQ deriv.
COc1ccc(-c2cc(O)c3c(c2)C(=O)c2cc(-c4ccc(N(C)C)cc4)ccc2C3=O)cc1	4.64457	HAQ deriv.
COc1ccc(-c2cc(O)c3c(c2)C(=O)c2cc(-c4ccc(N(c5ccccc5)c5ccccc5)cc4)ccc2C3=O)cc1	5.09925	HAQ deriv.
COc1ccc(-c2cc(O)c3c(c2)C(=O)c2cc(-c4cc(C)c(C)c(C)c4)ccc2C3=O)cc1	4.58909	HAQ deriv.
COc1ccc(-c2ccc3c(c2)C(=O)c2cc(-c4ccc(OC)cc4)cc(O)c2C3=O)cc1	4.48627	HAQ deriv.
[H]c1ccc2c(c1)C(=O)c1cc(-c3ccc(OC)cc3)cc(O)c1C2=O	4.07766	HAQ deriv.
[H]c1cc(O)c2c(c1)C(=O)c1cc(-c3ccc(C=C(C#N)C#N)cc3)ccc1C2=O	1.51446	HAQ deriv.
[H]c1cc(O)c2c(c1)C(=O)c1cc(-c3ccc([N+](=O)[O-])cc3)ccc1C2=O	1.46773	HAQ deriv.
[H]c1cc(O)c2c(c1)C(=O)c1cc(C(=O)c3ccccc3)ccc1C2=O	0.162155	HAQ deriv.
[H]c1cc(O)c2c(c1)C(=O)c1cc(-c3ccc(C#N)cc3)ccc1C2=O	1.17729	HAQ deriv.
[H]c1cc(O)c2c(c1)C(=O)c1cc(-c3ccc(C(F)(F)F)cc3)ccc1C2=O	1.01371	HAQ deriv.
[H]c1cc(O)c2c(c1)C(=O)c1cc(-c3ccc(N(C)C)cc3)ccc1C2=O	4.89196	HAQ deriv.
[H]c1cc(O)c2c(c1)C(=O)c1cc(-c3ccc(N(c4ccccc4)c4ccccc4)cc3)ccc1C2=O	5.0294	HAQ deriv.
[H]c1cc(O)c2c(c1)C(=O)c1cc(-c3cc(C)c(C)c(C)c3)ccc1C2=O	3.34654	HAQ deriv.
[H]c1cc(O)c2c(c1)C(=O)c1cc(-c3ccc(OC)cc3)ccc1C2=O	4.8358	HAQ deriv.
[H]c1ccc2c(c1)C(=O)c1cc([H])cc(O)c1C2=O	2.41752	HAQ deriv.
N#CC(C#N)=Cc1ccc(-c2ccc(-c3nc4ccc(-c5ccc(C=C(C#N)C#N)cc5)cc4[nH]3)c(O)c2)cc1	-5.20016	HBI deriv.
N#CC(C#N)=Cc1ccc(-c2ccc(-c3nc4ccc(-c5ccc([N+](=O)[O-])cc5)cc4[nH]3)c(O)c2)cc1	-0.984415	HBI deriv.
N#CC(C#N)=Cc1ccc(-c2ccc(-c3nc4ccc(C(=O)c5ccccc5)cc4[nH]3)c(O)c2)cc1	-2.81118	HBI deriv.
N#CC(C#N)=Cc1ccc(-c2ccc(-c3nc4ccc(-c5ccc(C#N)cc5)cc4[nH]3)c(O)c2)cc1	-0.749354	HBI deriv.
N#CC(C#N)=Cc1ccc(-c2ccc(-c3nc4ccc(-c5ccc(C(F)(F)F)cc5)cc4[nH]3)c(O)c2)cc1	-0.775656	HBI deriv.
[H]c1ccc2nc(-c3ccc(-c4ccc(C=C(C#N)C#N)cc4)cc3O)[nH]c2c1	-2.90748	HBI deriv.
COc1ccc(-c2ccc3nc(-c4ccc(-c5ccc(C=C(C#N)C#N)cc5)cc4O)[nH]c3c2)cc1	4.29742	HBI deriv.
Cc1cc(-c2ccc3nc(-c4ccc(-c5ccc(C=C(C#N)C#N)cc5)cc4O)[nH]c3c2)cc(C)c1C	2.43915	HBI deriv.
N#CC(C#N)=Cc1ccc(-c2ccc(-c3nc4ccc(-c5ccc(N(c6ccccc6)c6ccccc6)cc5)cc4[nH]3)c(O)c2)cc1	13.0005	HBI deriv.
CN(C)c1ccc(-c2ccc3nc(-c4ccc(-c5ccc(C=C(C#N)C#N)cc5)cc4O)[nH]c3c2)cc1	11.5683	HBI deriv.
CCN(CC)c1ccc(-c2ccc3nc(-c4ccc(-c5ccc(C=C(C#N)C#N)cc5)cc4O)[nH]c3c2)cc1	12.1153	HBI deriv.
N#CC(C#N)=Cc1ccc(-c2ccc3nc(-c4ccc(-c5ccc([N+](=O)[O-])cc5)cc4O)[nH]c3c2)cc1	-8.54014	HBI deriv.
O=[N+]([O-])c1ccc(-c2ccc(-c3nc4ccc(-c5ccc([N+](=O)[O-])cc5)cc4[nH]3)c(O)c2)cc1	-7.39858	HBI deriv.
O=C(c1ccccc1)c1ccc2nc(-c3ccc(-c4ccc([N+](=O)[O-])cc4)cc3O)[nH]c2c1	-2.66252	HBI deriv.
N#Cc1ccc(-c2ccc3nc(-c4ccc(-c5ccc([N+](=O)[O-])cc5)cc4O)[nH]c3c2)cc1	-0.902568	HBI deriv.
O=[N+]([O-])c1ccc(-c2ccc(-c3nc4ccc(-c5ccc(C(F)(F)F)cc5)cc4[nH]3)c(O)c2)cc1	-1.01829	HBI deriv.
[H]c1ccc2nc(-c3ccc(-c4ccc([N+](=O)[O-])cc4)cc3O)[nH]c2c1	-3.01741	HBI deriv.
COc1ccc(-c2ccc3nc(-c4ccc(-c5ccc([N+](=O)[O-])cc5)cc4O)[nH]c3c2)cc1	4.21538	HBI deriv.
Cc1cc(-c2ccc3nc(-c4ccc(-c5ccc([N+](=O)[O-])cc5)cc4O)[nH]c3c2)cc(C)c1C	2.36022	HBI deriv.
O=[N+]([O-])c1ccc(-c2ccc(-c3nc4ccc(-c5ccc(N(c6ccccc6)c6ccccc6)cc5)cc4[nH]3)c(O)c2)cc1	12.6728	HBI deriv.
CN(C)c1ccc(-c2ccc3nc(-c4ccc(-c5ccc([N+](=O)[O-])cc5)cc4O)[nH]c3c2)cc1	11.5647	HBI deriv.
CCN(CC)c1ccc(-c2ccc3nc(-c4ccc(-c5ccc([N+](=O)[O-])cc5)cc4O)[nH]c3c2)cc1	12.1175	HBI deriv.
N#CC(C#N)=Cc1ccc(-c2ccc3nc(-c4ccc(C(=O)c5ccccc5)cc4O)[nH]c3c2)cc1	-10.3673	HBI deriv.
O=C(c1ccccc1)c1ccc(-c2nc3ccc(-c4ccc([N+](=O)[O-])cc4)cc3[nH]2)c(O)c1	-10.6214	HBI deriv.
O=C(c1ccccc1)c1ccc(-c2nc3ccc(C(=O)c4ccccc4)cc3[nH]2)c(O)c1	-6.35029	HBI deriv.
N#Cc1ccc(-c2ccc3nc(-c4ccc(C(=O)c5ccccc5)cc4O)[nH]c3c2)cc1	-3.62798	HBI deriv.
O=C(c1ccccc1)c1ccc(-c2nc3ccc(-c4ccc(C(F)(F)F)cc4)cc3[nH]2)c(O)c1	-1.13045	HBI deriv.
[H]c1ccc2nc(-c3ccc(C(=O)c4ccccc4)cc3O)[nH]c2c1	-1.19251	HBI deriv.
COc1ccc(-c2ccc3nc(-c4ccc(C(=O)c5ccccc5)cc4O)[nH]c3c2)cc1	3.01163	HBI deriv.
Cc1cc(-c2ccc3nc(-c4ccc(C(=O)c5ccccc5)cc4O)[nH]c3c2)cc(C)c1C	1.09416	HBI deriv.
O=C(c1ccccc1)c1ccc(-c2nc3ccc(-c4ccc(N(c5ccccc5)c5ccccc5)cc4)cc3[nH]2)c(O)c1	12.2748	HBI deriv.
CN(C)c1ccc(-c2ccc3nc(-c4ccc(C(=O)c5ccccc5)cc4O)[nH]c3c2)cc1	10.5547	HBI deriv.
CCN(CC)c1ccc(-c2ccc3nc(-c4ccc(C(=O)c5ccccc5)cc4O)[nH]c3c2)cc1	11.0037	HBI deriv.
N#CC(C#N)=Cc1ccc(-c2ccc3nc(-c4ccc(-c5ccc(C#N)cc5)cc4O)[nH]c3c2)cc1	-8.83412	HBI deriv.
N#Cc1ccc(-c2ccc(-c3nc4ccc(-c5ccc([N+](=O)[O-])cc5)cc4[nH]3)c(O)c2)cc1	-9.30937	HBI deriv.
N#Cc1ccc(-c2ccc(-c3nc4ccc(C(=O)c5ccccc5)cc4[nH]3)c(O)c2)cc1	-3.30204	HBI deriv.
N#Cc1ccc(-c2ccc(-c3nc4ccc(-c5ccc(C#N)cc5)cc4[nH]3)c(O)c2)cc1	-2.32463	HBI deriv.
N#Cc1ccc(-c2ccc(-c3nc4ccc(-c5ccc(C(F)(F)F)cc5)cc4[nH]3)c(O)c2)cc1	-0.106649	HBI deriv.
[H]c1ccc2nc(-c3ccc(-c4ccc(C#N)cc4)cc3O)[nH]c2c1	-1.91082	HBI deriv.
COc1ccc(-c2ccc3nc(-c4ccc(-c5ccc(C#N)cc5)cc4O)[nH]c3c2)cc1	5.21649	HBI deriv.
Cc1cc(-c2ccc3nc(-c4ccc(-c5ccc(C#N)cc5)cc4O)[nH]c3c2)cc(C)c1C	3.76644	HBI deriv.
N#Cc1ccc(-c2ccc(-c3nc4ccc(-c5ccc(N(c6ccccc6)c6ccccc6)cc5)cc4[nH]3)c(O)c2)cc1	12.0116	HBI deriv.
CN(C)c1ccc(-c2ccc3nc(-c4ccc(-c5ccc(C#N)cc5)cc4O)[nH]c3c2)cc1	11.4193	HBI deriv.
CCN(CC)c1ccc(-c2ccc3nc(-c4ccc(-c5ccc(C#N)cc5)cc4O)[nH]c3c2)cc1	11.6792	HBI deriv.
N#CC(C#N)=Cc1ccc(-c2ccc3nc(-c4ccc(-c5ccc(C(F)(F)F)cc5)cc4O)[nH]c3c2)cc1	-9.0528	HBI deriv.
O=[N+]([O-])c1ccc(-c2ccc3nc(-c4ccc(-c5ccc(C(F)(F)F)cc5)cc4O)[nH]c3c2)cc1	-9.50364	HBI deriv.
O=C(c1ccccc1)c1ccc2nc(-c3ccc(-c4ccc(C(F)(F)F)cc4)cc3O)[nH]c2c1	-3.55367	HBI deriv.
N#Cc1ccc(-c2ccc3nc(-c4ccc(-c5ccc(C(F)(F)F)cc5)cc4O)[nH]c3c2)cc1	-4.57983	HBI deriv.
Oc1cc(-c2ccc(C(F)(F)F)cc2)ccc1-c1nc2ccc(-c3ccc(C(F)(F)F)cc3)cc2[nH]1	-2.41557	HBI deriv.
[H]c1ccc2nc(-c3ccc(-c4ccc(C(F)(F)F)cc4)cc3O)[nH]c2c1	-2.70843	HBI deriv.
COc1ccc(-c2ccc3nc(-c4ccc(-c5ccc(C(F)(F)F)cc5)cc4O)[nH]c3c2)cc1	4.38695	HBI deriv.
Cc1cc(-c2ccc3nc(-c4ccc(-c5ccc(C(F)(F)F)cc5)cc4O)[nH]c3c2)cc(C)c1C	3.02077	HBI deriv.
Oc1cc(-c2ccc(C(F)(F)F)cc2)ccc1-c1nc2ccc(-c3ccc(N(c4ccccc4)c4ccccc4)cc3)cc2[nH]1	11.2857	HBI deriv.
CN(C)c1ccc(-c2ccc3nc(-c4ccc(-c5ccc(C(F)(F)F)cc5)cc4O)[nH]c3c2)cc1	10.8114	HBI deriv.
CCN(CC)c1ccc(-c2ccc3nc(-c4ccc(-c5ccc(C(F)(F)F)cc5)cc4O)[nH]c3c2)cc1	11.0752	HBI deriv.
[H]c1ccc(-c2nc3ccc(-c4ccc(C=C(C#N)C#N)cc4)cc3[nH]2)c(O)c1	-11.2278	HBI deriv.
[H]c1ccc(-c2nc3ccc(C(=O)c4ccccc4)cc3[nH]2)c(O)c1	-15.2572	HBI deriv.
[H]c1ccc(-c2nc3ccc(-c4ccc(C#N)cc4)cc3[nH]2)c(O)c1	-10.754	HBI deriv.
[H]c1ccc(-c2nc3ccc(-c4ccc(C(F)(F)F)cc4)cc3[nH]2)c(O)c1	-9.86651	HBI deriv.
[H]c1ccc(-c2nc3ccc([H])cc3[nH]2)c(O)c1	-9.16582	HBI deriv.
[H]c1ccc(-c2nc3ccc(-c4ccc(OC)cc4)cc3[nH]2)c(O)c1	-2.02988	HBI deriv.
[H]c1ccc(-c2nc3ccc(-c4cc(C)c(C)c(C)c4)cc3[nH]2)c(O)c1	-3.27873	HBI deriv.
[H]c1ccc(-c2nc3ccc(-c4ccc(N(c5ccccc5)c5ccccc5)cc4)cc3[nH]2)c(O)c1	6.24538	HBI deriv.
[H]c1ccc(-c2nc3ccc(-c4ccc(N(C)C)cc4)cc3[nH]2)c(O)c1	4.8985	HBI deriv.
[H]c1ccc(-c2nc3ccc(-c4ccc(N(CC)CC)cc4)cc3[nH]2)c(O)c1	5.76316	HBI deriv.
COc1ccc(-c2ccc(-c3nc4ccc(-c5ccc(C=C(C#N)C#N)cc5)cc4[nH]3)c(O)c2)cc1	-5.6201	HBI deriv.
COc1ccc(-c2ccc(-c3nc4ccc(-c5ccc([N+](=O)[O-])cc5)cc4[nH]3)c(O)c2)cc1	-5.79927	HBI deriv.
COc1ccc(-c2ccc(-c3nc4ccc(C(=O)c5ccccc5)cc4[nH]3)c(O)c2)cc1	-8.33283	HBI deriv.
COc1ccc(-c2ccc(-c3nc4ccc(-c5ccc(C#N)cc5)cc4[nH]3)c(O)c2)cc1	-5.35717	HBI deriv.
COc1ccc(-c2ccc(-c3nc4ccc(-c5ccc(C(F)(F)F)cc5)cc4[nH]3)c(O)c2)cc1	-4.06633	HBI deriv.
[H]c1ccc2nc(-c3ccc(-c4ccc(OC)cc4)cc3O)[nH]c2c1	-2.60094	HBI deriv.
COc1ccc(-c2ccc(-c3nc4ccc(-c5ccc(OC)cc5)cc4[nH]3)c(O)c2)cc1	1.98264	HBI deriv.
COc1ccc(-c2ccc(-c3nc4ccc(-c5cc(C)c(C)c(C)c5)cc4[nH]3)c(O)c2)cc1	1.17716	HBI deriv.
COc1ccc(-c2ccc(-c3nc4ccc(-c5ccc(N(c6ccccc6)c6ccccc6)cc5)cc4[nH]3)c(O)c2)cc1	7.53847	HBI deriv.
COc1ccc(-c2ccc(-c3nc4ccc(-c5ccc(N(C)C)cc5)cc4[nH]3)c(O)c2)cc1	7.38042	HBI deriv.
CCN(CC)c1ccc(-c2ccc3nc(-c4ccc(-c5ccc(OC)cc5)cc4O)[nH]c3c2)cc1	8.09915	HBI deriv.
Cc1cc(-c2ccc(-c3nc4ccc(-c5ccc(C=C(C#N)C#N)cc5)cc4[nH]3)c(O)c2)cc(C)c1C	-7.183	HBI deriv.
Cc1cc(-c2ccc(-c3nc4ccc(-c5ccc([N+](=O)[O-])cc5)cc4[nH]3)c(O)c2)cc(C)c1C	-7.1624	HBI deriv.
Cc1cc(-c2ccc(-c3nc4ccc(C(=O)c5ccccc5)cc4[nH]3)c(O)c2)cc(C)c1C	-4.16618	HBI deriv.
Cc1cc(-c2ccc(-c3nc4ccc(-c5ccc(C#N)cc5)cc4[nH]3)c(O)c2)cc(C)c1C	-6.25064	HBI deriv.
Cc1cc(-c2ccc(-c3nc4ccc(-c5ccc(C(F)(F)F)cc5)cc4[nH]3)c(O)c2)cc(C)c1C	-4.82613	HBI deriv.
[H]c1ccc2nc(-c3ccc(-c4cc(C)c(C)c(C)c4)cc3O)[nH]c2c1	-0.8994	HBI deriv.
COc1ccc(-c2ccc3nc(-c4ccc(-c5cc(C)c(C)c(C)c5)cc4O)[nH]c3c2)cc1	1.81013	HBI deriv.
Cc1cc(-c2ccc(-c3nc4ccc(-c5cc(C)c(C)c(C)c5)cc4[nH]3)c(O)c2)cc(C)c1C	0.942468	HBI deriv.
Cc1cc(-c2ccc(-c3nc4ccc(-c5ccc(N(c6ccccc6)c6ccccc6)cc5)cc4[nH]3)c(O)c2)cc(C)c1C	7.29793	HBI deriv.
Cc1cc(-c2ccc(-c3nc4ccc(-c5ccc(N(C)C)cc5)cc4[nH]3)c(O)c2)cc(C)c1C	7.53405	HBI deriv.
CCN(CC)c1ccc(-c2ccc3nc(-c4ccc(-c5cc(C)c(C)c(C)c5)cc4O)[nH]c3c2)cc1	9.81336	HBI deriv.
N#CC(C#N)=Cc1ccc(-c2ccc3nc(-c4ccc(-c5ccc(N(c6ccccc6)c6ccccc6)cc5)cc4O)[nH]c3c2)cc1	3.09569	HBI deriv.
O=[N+]([O-])c1ccc(-c2ccc3nc(-c4ccc(-c5ccc(N(c6ccccc6)c6ccccc6)cc5)cc4O)[nH]c3c2)cc1	2.84972	HBI deriv.
O=C(c1ccccc1)c1ccc2nc(-c3ccc(-c4ccc(N(c5ccccc5)c5ccccc5)cc4)cc3O)[nH]c2c1	3.54956	HBI deriv.
N#Cc1ccc(-c2ccc3nc(-c4ccc(-c5ccc(N(c6ccccc6)c6ccccc6)cc5)cc4O)[nH]c3c2)cc1	4.24507	HBI deriv.
Oc1cc(-c2ccc(N(c3ccccc3)c3ccccc3)cc2)ccc1-c1nc2ccc(-c3ccc(C(F)(F)F)cc3)cc2[nH]1	6.42825	HBI deriv.
[H]c1ccc2nc(-c3ccc(-c4ccc(N(c5ccccc5)c5ccccc5)cc4)cc3O)[nH]c2c1	7.48227	HBI deriv.
COc1ccc(-c2ccc3nc(-c4ccc(-c5ccc(N(c6ccccc6)c6ccccc6)cc5)cc4O)[nH]c3c2)cc1	7.63708	HBI deriv.
Cc1cc(-c2ccc3nc(-c4ccc(-c5ccc(N(c6ccccc6)c6ccccc6)cc5)cc4O)[nH]c3c2)cc(C)c1C	7.51093	HBI deriv.
Oc1cc(-c2ccc(N(c3ccccc3)c3ccccc3)cc2)ccc1-c1nc2ccc(-c3ccc(N(c4ccccc4)c4ccccc4)cc3)cc2[nH]1	8.57745	HBI deriv.
CN(C)c1ccc(-c2ccc3nc(-c4ccc(-c5ccc(N(c6ccccc6)c6ccccc6)cc5)cc4O)[nH]c3c2)cc1	8.79525	HBI deriv.
CCN(CC)c1ccc(-c2ccc3nc(-c4ccc(-c5ccc(N(c6ccccc6)c6ccccc6)cc5)cc4O)[nH]c3c2)cc1	9.28518	HBI deriv.
CN(C)c1ccc(-c2ccc(-c3nc4ccc(-c5ccc(C=C(C#N)C#N)cc5)cc4[nH]3)c(O)c2)cc1	2.61635	HBI deriv.
CN(C)c1ccc(-c2ccc(-c3nc4ccc(-c5ccc([N+](=O)[O-])cc5)cc4[nH]3)c(O)c2)cc1	2.41744	HBI deriv.
CN(C)c1ccc(-c2ccc(-c3nc4ccc(C(=O)c5ccccc5)cc4[nH]3)c(O)c2)cc1	-1.10398	HBI deriv.
CN(C)c1ccc(-c2ccc(-c3nc4ccc(-c5ccc(C#N)cc5)cc4[nH]3)c(O)c2)cc1	0.651555	HBI deriv.
CN(C)c1ccc(-c2ccc(-c3nc4ccc(-c5ccc(C(F)(F)F)cc5)cc4[nH]3)c(O)c2)cc1	0.931002	HBI deriv.
[H]c1ccc2nc(-c3ccc(-c4ccc(N(C)C)cc4)cc3O)[nH]c2c1	2.1578	HBI deriv.
COc1ccc(-c2ccc3nc(-c4ccc(-c5ccc(N(C)C)cc5)cc4O)[nH]c3c2)cc1	3.94837	HBI deriv.
Cc1cc(-c2ccc3nc(-c4ccc(-c5ccc(N(C)C)cc5)cc4O)[nH]c3c2)cc(C)c1C	3.59817	HBI deriv.
CN(C)c1ccc(-c2ccc(-c3nc4ccc(-c5ccc(N(c6ccccc6)c6ccccc6)cc5)cc4[nH]3)c(O)c2)cc1	6.89125	HBI deriv.
CN(C)c1ccc(-c2ccc(-c3nc4ccc(-c5ccc(N(C)C)cc5)cc4[nH]3)c(O)c2)cc1	7.17314	HBI deriv.
CCN(CC)c1ccc(-c2ccc3nc(-c4ccc(-c5ccc(N(C)C)cc5)cc4O)[nH]c3c2)cc1	7.83095	HBI deriv.
CCN(CC)c1ccc(-c2ccc(-c3nc4ccc(-c5ccc(C=C(C#N)C#N)cc5)cc4[nH]3)c(O)c2)cc1	2.75314	HBI deriv.
CCN(CC)c1ccc(-c2ccc(-c3nc4ccc(-c5ccc([N+](=O)[O-])cc5)cc4[nH]3)c(O)c2)cc1	2.54392	HBI deriv.
CCN(CC)c1ccc(-c2ccc(-c3nc4ccc(C(=O)c5ccccc5)cc4[nH]3)c(O)c2)cc1	-0.303592	HBI deriv.
CCN(CC)c1ccc(-c2ccc(-c3nc4ccc(-c5ccc(C#N)cc5)cc4[nH]3)c(O)c2)cc1	1.38965	HBI deriv.
CCN(CC)c1ccc(-c2ccc(-c3nc4ccc(-c5ccc(C(F)(F)F)cc5)cc4[nH]3)c(O)c2)cc1	1.63177	HBI deriv.
[H]c1ccc2nc(-c3ccc(-c4ccc(N(CC)CC)cc4)cc3O)[nH]c2c1	2.89497	HBI deriv.
CCN(CC)c1ccc(-c2ccc(-c3nc4ccc(-c5ccc(OC)cc5)cc4[nH]3)c(O)c2)cc1	4.42259	HBI deriv.
CCN(CC)c1ccc(-c2ccc(-c3nc4ccc(-c5cc(C)c(C)c(C)c5)cc4[nH]3)c(O)c2)cc1	4.16598	HBI deriv.
CCN(CC)c1ccc(-c2ccc(-c3nc4ccc(-c5ccc(N(c6ccccc6)c6ccccc6)cc5)cc4[nH]3)c(O)c2)cc1	6.9554	HBI deriv.
CCN(CC)c1ccc(-c2ccc(-c3nc4ccc(-c5ccc(N(C)C)cc5)cc4[nH]3)c(O)c2)cc1	7.25402	HBI deriv.
CCN(CC)c1ccc(-c2ccc(-c3nc4ccc(-c5ccc(N(CC)CC)cc5)cc4[nH]3)c(O)c2)cc1	7.96563	HBI deriv.
N#CC(C#N)=Cc1ccc(-c2ccc(-c3nc4ccc(-c5ccc(C=C(C#N)C#N)cc5)cc4s3)c(O)c2)cc1	-0.755941	HBT deriv.
N#CC(C#N)=Cc1ccc(-c2ccc(-c3nc4ccc(-c5ccc([N+](=O)[O-])cc5)cc4s3)c(O)c2)cc1	1.2618	HBT deriv.
N#CC(C#N)=Cc1ccc(-c2ccc(-c3nc4ccc(C(=O)c5ccccc5)cc4s3)c(O)c2)cc1	-0.530667	HBT deriv.
N#CC(C#N)=Cc1ccc(-c2ccc(-c3nc4ccc(-c5ccc(C#N)cc5)cc4s3)c(O)c2)cc1	1.31972	HBT deriv.
N#CC(C#N)=Cc1ccc(-c2ccc(-c3nc4ccc(-c5ccc(C(F)(F)F)cc5)cc4s3)c(O)c2)cc1	1.05269	HBT deriv.
[H]c1ccc2nc(-c3ccc(-c4ccc(C=C(C#N)C#N)cc4)cc3O)sc2c1	-0.837061	HBT deriv.
COc1ccc(-c2ccc3nc(-c4ccc(-c5ccc(C=C(C#N)C#N)cc5)cc4O)sc3c2)cc1	5.71506	HBT deriv.
Cc1cc(-c2ccc3nc(-c4ccc(-c5ccc(C=C(C#N)C#N)cc5)cc4O)sc3c2)cc(C)c1C	3.89556	HBT deriv.
CN(C)c1ccc(-c2ccc3nc(-c4ccc(-c5ccc(C=C(C#N)C#N)cc5)cc4O)sc3c2)cc1	11.713	HBT deriv.
CCN(CC)c1ccc(-c2ccc3nc(-c4ccc(-c5ccc(C=C(C#N)C#N)cc5)cc4O)sc3c2)cc1	11.9302	HBT deriv.
N#CC(C#N)=Cc1ccc(-c2ccc3nc(-c4ccc(-c5ccc([N+](=O)[O-])cc5)cc4O)sc3c2)cc1	-3.84191	HBT deriv.
O=[N+]([O-])c1ccc(-c2ccc(-c3nc4ccc(-c5ccc([N+](=O)[O-])cc5)cc4s3)c(O)c2)cc1	-3.20233	HBT deriv.
O=C(c1ccccc1)c1ccc2nc(-c3ccc(-c4ccc([N+](=O)[O-])cc4)cc3O)sc2c1	-0.485818	HBT deriv.
N#Cc1ccc(-c2ccc3nc(-c4ccc(-c5ccc([N+](=O)[O-])cc5)cc4O)sc3c2)cc1	1.13593	HBT deriv.
O=[N+]([O-])c1ccc(-c2ccc(-c3nc4ccc(-c5ccc(C(F)(F)F)cc5)cc4s3)c(O)c2)cc1	0.852812	HBT deriv.
[H]c1ccc2nc(-c3ccc(-c4ccc([N+](=O)[O-])cc4)cc3O)sc2c1	-1.1324	HBT deriv.
COc1ccc(-c2ccc3nc(-c4ccc(-c5ccc([N+](=O)[O-])cc5)cc4O)sc3c2)cc1	5.63268	HBT deriv.
Cc1cc(-c2ccc3nc(-c4ccc(-c5ccc([N+](=O)[O-])cc5)cc4O)sc3c2)cc(C)c1C	3.79455	HBT deriv.
CN(C)c1ccc(-c2ccc3nc(-c4ccc(-c5ccc([N+](=O)[O-])cc5)cc4O)sc3c2)cc1	11.7703	HBT deriv.
CCN(CC)c1ccc(-c2ccc3nc(-c4ccc(-c5ccc([N+](=O)[O-])cc5)cc4O)sc3c2)cc1	12.0215	HBT deriv.
N#CC(C#N)=Cc1ccc(-c2ccc3nc(-c4ccc(C(=O)c5ccccc5)cc4O)sc3c2)cc1	-5.76122	HBT deriv.
O=C(c1ccccc1)c1ccc(-c2nc3ccc(-c4ccc([N+](=O)[O-])cc4)cc3s2)c(O)c1	-6.10791	HBT deriv.
O=C(c1ccccc1)c1ccc(-c2nc3ccc(C(=O)c4ccccc4)cc3s2)c(O)c1	-2.68861	HBT deriv.
N#Cc1ccc(-c2ccc3nc(-c4ccc(C(=O)c5ccccc5)cc4O)sc3c2)cc1	-0.560656	HBT deriv.
O=C(c1ccccc1)c1ccc(-c2nc3ccc(-c4ccc(C(F)(F)F)cc4)cc3s2)c(O)c1	-0.379873	HBT deriv.
[H]c1ccc2nc(-c3ccc(C(=O)c4ccccc4)cc3O)sc2c1	-0.609239	HBT deriv.
COc1ccc(-c2ccc3nc(-c4ccc(C(=O)c5ccccc5)cc4O)sc3c2)cc1	4.28334	HBT deriv.
Cc1cc(-c2ccc3nc(-c4ccc(C(=O)c5ccccc5)cc4O)sc3c2)cc(C)c1C	2.79179	HBT deriv.
CN(C)c1ccc(-c2ccc3nc(-c4ccc(C(=O)c5ccccc5)cc4O)sc3c2)cc1	10.6576	HBT deriv.
CCN(CC)c1ccc(-c2ccc3nc(-c4ccc(C(=O)c5ccccc5)cc4O)sc3c2)cc1	10.8175	HBT deriv.
N#CC(C#N)=Cc1ccc(-c2ccc3nc(-c4ccc(-c5ccc(C#N)cc5)cc4O)sc3c2)cc1	-4.2155	HBT deriv.
N#Cc1ccc(-c2ccc(-c3nc4ccc(-c5ccc([N+](=O)[O-])cc5)cc4s3)c(O)c2)cc1	-4.92482	HBT deriv.
N#Cc1ccc(-c2ccc(-c3nc4ccc(C(=O)c5ccccc5)cc4s3)c(O)c2)cc1	-2.48005	HBT deriv.
N#Cc1ccc(-c2ccc(-c3nc4ccc(-c5ccc(C#N)cc5)cc4s3)c(O)c2)cc1	0.852893	HBT deriv.
N#Cc1ccc(-c2ccc(-c3nc4ccc(-c5ccc(C(F)(F)F)cc5)cc4s3)c(O)c2)cc1	1.10576	HBT deriv.
[H]c1ccc2nc(-c3ccc(-c4ccc(C#N)cc4)cc3O)sc2c1	-1.04383	HBT deriv.
COc1ccc(-c2ccc3nc(-c4ccc(-c5ccc(C#N)cc5)cc4O)sc3c2)cc1	5.97192	HBT deriv.
Cc1cc(-c2ccc3nc(-c4ccc(-c5ccc(C#N)cc5)cc4O)sc3c2)cc(C)c1C	4.59163	HBT deriv.
CN(C)c1ccc(-c2ccc3nc(-c4ccc(-c5ccc(C#N)cc5)cc4O)sc3c2)cc1	10.1371	HBT deriv.
CCN(CC)c1ccc(-c2ccc3nc(-c4ccc(-c5ccc(C#N)cc5)cc4O)sc3c2)cc1	10.2542	HBT deriv.
N#CC(C#N)=Cc1ccc(-c2ccc3nc(-c4ccc(-c5ccc(C(F)(F)F)cc5)cc4O)sc3c2)cc1	-4.63095	HBT deriv.
O=[N+]([O-])c1ccc(-c2ccc3nc(-c4ccc(-c5ccc(C(F)(F)F)cc5)cc4O)sc3c2)cc1	-5.29488	HBT deriv.
O=C(c1ccccc1)c1ccc2nc(-c3ccc(-c4ccc(C(F)(F)F)cc4)cc3O)sc2c1	-3.16367	HBT deriv.
N#Cc1ccc(-c2ccc3nc(-c4ccc(-c5ccc(C(F)(F)F)cc5)cc4O)sc3c2)cc1	-0.41088	HBT deriv.
Oc1cc(-c2ccc(C(F)(F)F)cc2)ccc1-c1nc2ccc(-c3ccc(C(F)(F)F)cc3)cc2s1	-0.0506354	HBT deriv.
[H]c1ccc2nc(-c3ccc(-c4ccc(C(F)(F)F)cc4)cc3O)sc2c1	-14.0421	HBT deriv.
COc1ccc(-c2ccc3nc(-c4ccc(-c5ccc(C(F)(F)F)cc5)cc4O)sc3c2)cc1	4.7965	HBT deriv.
Cc1cc(-c2ccc3nc(-c4ccc(-c5ccc(C(F)(F)F)cc5)cc4O)sc3c2)cc(C)c1C	3.50047	HBT deriv.
CN(C)c1ccc(-c2ccc3nc(-c4ccc(-c5ccc(C(F)(F)F)cc5)cc4O)sc3c2)cc1	9.62724	HBT deriv.
CCN(CC)c1ccc(-c2ccc3nc(-c4ccc(-c5ccc(C(F)(F)F)cc5)cc4O)sc3c2)cc1	9.75077	HBT deriv.
[H]c1ccc(-c2nc3ccc(-c4ccc(C=C(C#N)C#N)cc4)cc3s2)c(O)c1	-6.57711	HBT deriv.
[H]c1ccc(-c2nc3ccc(-c4ccc([N+](=O)[O-])cc4)cc3s2)c(O)c1	-6.96396	HBT deriv.
[H]c1ccc(-c2nc3ccc(C(=O)c4ccccc4)cc3s2)c(O)c1	-6.27309	HBT deriv.
[H]c1ccc(-c2nc3ccc(-c4ccc(C#N)cc4)cc3s2)c(O)c1	-4.78184	HBT deriv.
[H]c1ccc(-c2nc3ccc(-c4ccc(C(F)(F)F)cc4)cc3s2)c(O)c1	-4.2667	HBT deriv.
[H]c1ccc(-c2nc3ccc([H])cc3s2)c(O)c1	-5.46853	HBT deriv.
[H]c1ccc(-c2nc3ccc(-c4cc(C)c(C)c(C)c4)cc3s2)c(O)c1	-14.2777	HBT deriv.
[H]c1ccc(-c2nc3ccc(-c4ccc(N(c5ccccc5)c5ccccc5)cc4)cc3s2)c(O)c1	9.52242	HBT deriv.
[H]c1ccc(-c2nc3ccc(-c4ccc(N(C)C)cc4)cc3s2)c(O)c1	-5.5314	HBT deriv.
[H]c1ccc(-c2nc3ccc(-c4ccc(N(CC)CC)cc4)cc3s2)c(O)c1	7.98496	HBT deriv.
COc1ccc(-c2ccc(-c3nc4ccc(-c5ccc(C=C(C#N)C#N)cc5)cc4s3)c(O)c2)cc1	-0.326733	HBT deriv.
COc1ccc(-c2ccc(-c3nc4ccc(-c5ccc([N+](=O)[O-])cc5)cc4s3)c(O)c2)cc1	-0.723741	HBT deriv.
COc1ccc(-c2ccc(-c3nc4ccc(C(=O)c5ccccc5)cc4s3)c(O)c2)cc1	-1.67638	HBT deriv.
COc1ccc(-c2ccc(-c3nc4ccc(-c5ccc(C#N)cc5)cc4s3)c(O)c2)cc1	0.675475	HBT deriv.
COc1ccc(-c2ccc(-c3nc4ccc(-c5ccc(C(F)(F)F)cc5)cc4s3)c(O)c2)cc1	0.992628	HBT deriv.
COc1ccc(-c2ccc(-c3nc4ccc(-c5ccc(OC)cc5)cc4s3)c(O)c2)cc1	-7.97758	HBT deriv.
COc1ccc(-c2ccc(-c3nc4ccc(-c5cc(C)c(C)c(C)c5)cc4s3)c(O)c2)cc1	-8.6651	HBT deriv.
COc1ccc(-c2ccc(-c3nc4ccc(-c5ccc(N(c6ccccc6)c6ccccc6)cc5)cc4s3)c(O)c2)cc1	9.74879	HBT deriv.
COc1ccc(-c2ccc(-c3nc4ccc(-c5ccc(N(C)C)cc5)cc4s3)c(O)c2)cc1	8.76227	HBT deriv.
CCN(CC)c1ccc(-c2ccc3nc(-c4ccc(-c5ccc(OC)cc5)cc4O)sc3c2)cc1	8.86678	HBT deriv.
Cc1cc(-c2ccc(-c3nc4ccc(-c5ccc(C=C(C#N)C#N)cc5)cc4s3)c(O)c2)cc(C)c1C	-2.38394	HBT deriv.
Cc1cc(-c2ccc(-c3nc4ccc(-c5ccc([N+](=O)[O-])cc5)cc4s3)c(O)c2)cc(C)c1C	-2.82852	HBT deriv.
Cc1cc(-c2ccc(-c3nc4ccc(C(=O)c5ccccc5)cc4s3)c(O)c2)cc(C)c1C	-3.06569	HBT deriv.
Cc1cc(-c2ccc(-c3nc4ccc(-c5ccc(C#N)cc5)cc4s3)c(O)c2)cc(C)c1C	-0.421609	HBT deriv.
Cc1cc(-c2ccc(-c3nc4ccc(-c5ccc(C(F)(F)F)cc5)cc4s3)c(O)c2)cc(C)c1C	0.162504	HBT deriv.
COc1ccc(-c2ccc3nc(-c4ccc(-c5cc(C)c(C)c(C)c5)cc4O)sc3c2)cc1	-8.30673	HBT deriv.
Cc1cc(-c2ccc(-c3nc4ccc(-c5cc(C)c(C)c(C)c5)cc4s3)c(O)c2)cc(C)c1C	-9.04361	HBT deriv.
Cc1cc(-c2ccc(-c3nc4ccc(-c5ccc(N(c6ccccc6)c6ccccc6)cc5)cc4s3)c(O)c2)cc(C)c1C	9.8118	HBT deriv.
Cc1cc(-c2ccc(-c3nc4ccc(-c5ccc(N(C)C)cc5)cc4s3)c(O)c2)cc(C)c1C	8.7659	HBT deriv.
CCN(CC)c1ccc(-c2ccc3nc(-c4ccc(-c5cc(C)c(C)c(C)c5)cc4O)sc3c2)cc1	8.95912	HBT deriv.
N#CC(C#N)=Cc1ccc(-c2ccc3nc(-c4ccc(-c5ccc(N(c6ccccc6)c6ccccc6)cc5)cc4O)sc3c2)cc1	6.24505	HBT deriv.
O=[N+]([O-])c1ccc(-c2ccc3nc(-c4ccc(-c5ccc(N(c6ccccc6)c6ccccc6)cc5)cc4O)sc3c2)cc1	6.05484	HBT deriv.
O=C(c1ccccc1)c1ccc2nc(-c3ccc(-c4ccc(N(c5ccccc5)c5ccccc5)cc4)cc3O)sc2c1	6.43324	HBT deriv.
N#Cc1ccc(-c2ccc3nc(-c4ccc(-c5ccc(N(c6ccccc6)c6ccccc6)cc5)cc4O)sc3c2)cc1	6.77326	HBT deriv.
Oc1cc(-c2ccc(N(c3ccccc3)c3ccccc3)cc2)ccc1-c1nc2ccc(-c3ccc(C(F)(F)F)cc3)cc2s1	6.9599	HBT deriv.
[H]c1ccc2nc(-c3ccc(-c4ccc(N(c5ccccc5)c5ccccc5)cc4)cc3O)sc2c1	6.84587	HBT deriv.
COc1ccc(-c2ccc3nc(-c4ccc(-c5ccc(N(c6ccccc6)c6ccccc6)cc5)cc4O)sc3c2)cc1	6.98766	HBT deriv.
Cc1cc(-c2ccc3nc(-c4ccc(-c5ccc(N(c6ccccc6)c6ccccc6)cc5)cc4O)sc3c2)cc(C)c1C	6.96275	HBT deriv.
Oc1cc(-c2ccc(N(c3ccccc3)c3ccccc3)cc2)ccc1-c1nc2ccc(-c3ccc(N(c4ccccc4)c4ccccc4)cc3)cc2s1	7.89771	HBT deriv.
CN(C)c1ccc(-c2ccc3nc(-c4ccc(-c5ccc(N(c6ccccc6)c6ccccc6)cc5)cc4O)sc3c2)cc1	7.62411	HBT deriv.
CCN(CC)c1ccc(-c2ccc3nc(-c4ccc(-c5ccc(N(c6ccccc6)c6ccccc6)cc5)cc4O)sc3c2)cc1	8.24297	HBT deriv.
CN(C)c1ccc(-c2ccc(-c3nc4ccc(-c5ccc(C=C(C#N)C#N)cc5)cc4s3)c(O)c2)cc1	5.9786	HBT deriv.
CN(C)c1ccc(-c2ccc(-c3nc4ccc(-c5ccc([N+](=O)[O-])cc5)cc4s3)c(O)c2)cc1	5.81337	HBT deriv.
CN(C)c1ccc(-c2ccc(-c3nc4ccc(C(=O)c5ccccc5)cc4s3)c(O)c2)cc1	4.36654	HBT deriv.
CN(C)c1ccc(-c2ccc(-c3nc4ccc(-c5ccc(C#N)cc5)cc4s3)c(O)c2)cc1	5.40988	HBT deriv.
CN(C)c1ccc(-c2ccc(-c3nc4ccc(-c5ccc(C(F)(F)F)cc5)cc4s3)c(O)c2)cc1	5.28916	HBT deriv.
[H]c1ccc2nc(-c3ccc(-c4ccc(N(C)C)cc4)cc3O)sc2c1	3.40602	HBT deriv.
COc1ccc(-c2ccc3nc(-c4ccc(-c5ccc(N(C)C)cc5)cc4O)sc3c2)cc1	5.45743	HBT deriv.
Cc1cc(-c2ccc3nc(-c4ccc(-c5ccc(N(C)C)cc5)cc4O)sc3c2)cc(C)c1C	5.35099	HBT deriv.
CN(C)c1ccc(-c2ccc(-c3nc4ccc(-c5ccc(N(C)C)cc5)cc4s3)c(O)c2)cc1	8.89961	HBT deriv.
CCN(CC)c1ccc(-c2ccc3nc(-c4ccc(-c5ccc(N(C)C)cc5)cc4O)sc3c2)cc1	9.02911	HBT deriv.
CCN(CC)c1ccc(-c2ccc(-c3nc4ccc(-c5ccc(C=C(C#N)C#N)cc5)cc4s3)c(O)c2)cc1	6.05445	HBT deriv.
CCN(CC)c1ccc(-c2ccc(-c3nc4ccc(-c5ccc([N+](=O)[O-])cc5)cc4s3)c(O)c2)cc1	5.87299	HBT deriv.
CCN(CC)c1ccc(-c2ccc(-c3nc4ccc(C(=O)c5ccccc5)cc4s3)c(O)c2)cc1	4.66077	HBT deriv.
CCN(CC)c1ccc(-c2ccc(-c3nc4ccc(-c5ccc(C#N)cc5)cc4s3)c(O)c2)cc1	5.49704	HBT deriv.
CCN(CC)c1ccc(-c2ccc(-c3nc4ccc(-c5ccc(C(F)(F)F)cc5)cc4s3)c(O)c2)cc1	4.96201	HBT deriv.
[H]c1ccc2nc(-c3ccc(-c4ccc(N(CC)CC)cc4)cc3O)sc2c1	3.26193	HBT deriv.
CCN(CC)c1ccc(-c2ccc(-c3nc4ccc(-c5ccc(OC)cc5)cc4s3)c(O)c2)cc1	5.22011	HBT deriv.
CCN(CC)c1ccc(-c2ccc(-c3nc4ccc(-c5cc(C)c(C)c(C)c5)cc4s3)c(O)c2)cc1	5.40229	HBT deriv.
CCN(CC)c1ccc(-c2ccc(-c3nc4ccc(-c5ccc(N(c6ccccc6)c6ccccc6)cc5)cc4s3)c(O)c2)cc1	6.30369	HBT deriv.
CCN(CC)c1ccc(-c2ccc(-c3nc4ccc(-c5ccc(N(C)C)cc5)cc4s3)c(O)c2)cc1	6.00089	HBT deriv.
CCN(CC)c1ccc(-c2ccc(-c3nc4ccc(-c5ccc(N(CC)CC)cc5)cc4s3)c(O)c2)cc1	9.00784	HBT deriv.
