# Supplementary material for: Unveiling key descriptors via machine learning: toward rational molecular design of chromophores with excited-state intramolecular proton transfer
Source: Chem Sci. 2026 Feb 9;17(14):7146–56. doi: 10.1039/d5sc07051a (PMC12910287; doi:10.1039/d5sc07051a)
Supplement: SC-017-D5SC07051A-s002 [file SC-017-D5SC07051A-s002.xlsx]

## Sheet: Sheet1
Unveiling Key Descriptors via Machine Learning: Toward Rational Molecular Design of Chromophores with Excited-State Intramolecular Proton Transfer Shengsheng Wei,1 Zipeng Yang,1 Chao Yang,1 Hongmei Zhao,1 Yang Li,1 Yuanyuan Guo,1 Andong Xia,1* Zhuoran Kuang,1* 1. State Key Laboratory of Information Photonic and Optical Communications, and School of Science, Beijing University of Posts and Telecom…
smiles	DOI
C1(C2=CC(C3=CC=CC=C3)=NN2)=CC=CC=N1	10.1021/ja035382y
CC1=NNC(C2=CC=CC=N2)=C1
CC(C1=NNC(C2=CC=CC=N2)=C1)(C)C
C1(C2=CC(C3=NC=CC=C3)=NN2)=CC=CC=N1
C1(C2=CC(C3=NC=CC=C3)=NN2)=CC=CC=N1	10.1021/ja2062693
OC1=C2C(C(C=C(C=CC=C3)C3=C4)=C4C2=O)=CC=C1
OC1=C2C(C(C=CC=C3)=C3C2=O)=CC=C1
O=C1C2=C(O)C3=C(C=C(C=CC=C4)C4=C3)C2=CC=C1
[H]N1C(C2=NC=CC=C2)=CC(C(F)(F)F)=N1	10.1039/C2CP23938H
[H]N1C(C2=NC=CC=C2CCC3)=C3C(C(F)(F)F)=N1
[H]N1C(C2=NC=CC=C2CC3)=C3C(C(F)(F)F)=N1
[H]N1C(C2=NC=CC=C2C=C3)=C3C(C(F)(F)F)=N1
OC1=C(C2=CC=CC=C2)OC3=C(C1=O)C=CC=C3	10.1039/C2CS35195A
OC1=C(C2=CC3=C(C=CC=C3)O2)OC4=C(C1=O)C=CC=C4
OC1=C(C2=CC3=C(C(CCC4)=C(N4CCC5)C5=C3)O2)OC6=C(C1=O)C=CC=C6
OC1=C(C2=CC=C(N(CC)CC)C=C2)OC3=C(C1=O)C=CC=C3
OC1=C(C2=CC3=C(C=C(N(CC)CC)C=C3)O2)OC4=C(C1=O)C=CC=C4
OC1=C(C2=CC=C(N(CC)CC)C=C2)OC3=C(C1=O)C=CC(OC)=C3
OC1=CC=CC=C1C2=NC3=CC=C(/C=C(C#N)/C#N)C=C3S2
OC1=C(C2=CC3=C(C=C(N(CC)CC)C=C3)O2)OC4=C(C1=O)C=CC(OC)=C4
OC1=C(C2=CC(CCC3)=C(N3CCC4)C4=C2)OC5=C(C1=O)C=CC=C5
OC1=CC=CC=C1C2=NC3=CC=C(/C=C(C#N)/C#N)C=C3O2
OC1=CC=CC=C1C2=NC3=CC=C(/C=C(C(O)=O)/C#N)C=C3O2
OC1=CC=CC=C1C2=NC3=CC=C(/C=C(C(OC(CCCC)CC)=O)/C#N)C=C3O2
O=CC1=CC=C(S1)C2=C(O)C(C3=CC=CC=C3O2)=O	10.1039/C5SC01945A
OC1=C(C2=CC=C(/C=C(C#N)\C#N)S2)OC3=CC=CC=C3C1=O
NC1=CC=CC=C1C2=NC(C=CC=C3)=C3S2	10.1021/acs.jpclett.5b00423
NC1=CC=C(C#N)C=C1C2=NC(C=CC=C3)=C3S2
CC1=CC=C(S(NC2=CC=CC=C2C3=NC(C=CC=C4)=C4S3)(=O)=O)C=C1
O=C(NC1=CC=CC=C1C2=NC(C=CC=C3)=C3S2)C
CC1=CC=C(S(NC2=CC=C(C#N)C=C2C3=NC(C=CC=C4)=C4S3)(=O)=O)C=C1
CNC1=CC=CC=C1C2=NC(C=CC=C3)=C3S2
NC1=CC=C(NS(C2=CC=C(C)C=C2)(=O)=O)C(C3=NC(C=CC=C4)=C4S3)=C1
CNC1=CC=C(C#N)C=C1C2=NC(C=CC=C3)=C3S2
NC1=CC=CC=C1/C=C2N=C(C)N(C)C\2=O	10.1002/chem.201602425
CN(C/1=O)C(C)=NC1=C/C2=CC=CC=C2NS(C3=CC=C(C)C=C3)(=O)=O
CN(C/1=O)C(C)=NC1=C/C2=CC=CC=C2NC(C)=O
CN(C/1=O)C(C)=NC1=C/C2=CC=CC=C2NC(C(F)(F)F)=O
CN(C/1=O)C(C)=NC1=C/C2=CC=CC=C2NC(C3=CC=CC=C3)=O
OC1=CC=CC2=C1C(N=CC=C3)=C3C=C2	10.1038/s41570-018-0020-z
O=C1C2=C(C=CC=C2NC(CCCCCC)=O)C(C3=CC=CC=C31)=O
OC1=CC=CC=C1C2=NC3=CC=CC=C3N2
O=C1C2=C(C=CC=C2NC(CCl)=O)C(C3=CC=CC=C31)=O
OC1=CC=CC=C1C2=NC3=CC=CC=C3O2
O=C1C2=C(C=CC=C2NC(C(F)(F)F)=O)C(C3=CC=CC=C31)=O
O=C(C1=CC=CC=C1)NC2=CC=CC=C2C3=NC4=CC=CC=C4N3
O=C1C2=C(C=CC=C2NC(C(Cl)Cl)=O)C(C3=CC=CC=C31)=O
OC1=CC=CC=C1C2=NC3=CC=CC=C3S2
O=C(C1=CC=CC=C1)NC2=CC=CC=C2C3=NC4=CC=CC=C4N3
CC(C=C1)=CC=C1N2C(C3=CC=CC=C3)=C(C4=CC=CC=C4)N=C2C5=CC=CC=C5NS(=O)(C6=CC=C(C)C=C6)=O
O=C1N(C)C(C)=N/C1=C\C2=CC=CC=C2NC(C3=CC=CC=C3)=O
O=S(NC1=CC=CC=C1C2=NC3=CC=CC=C3N2)(C4=CC=C(C)C=C4)=O
O=C1N(C)C(C)=N/C1=C\C2=CC=CC=C2NS(C3=CC=C(C)C=C3)(=O)=O
O=C1N(C)C(C)=N/C1=C\C2=CC=CC=C2N
O=C1N(C)C(C)=N/C1=C\C2=CC=CC=C2NC(C)=O
O=C1N(C)C(C)=N/C1=C\C2=CC=CC=C2NC(C(F)(F)F)=O
C1(C=CC2=C3C(NCC4=CC=CC=C4)=CC=C2)=C3N=CC=C1
CNC1=CC=CC2=C1C3=C(C=C2)C=CC=N3
[H]NC1=CC=CC2=C1C3=C(C=C2)C=CC=N3
O=C(NC1=CC=CC2=C1C3=C(C=C2)C=CC=N3)C(C)(C)C
[H]NC1=CC=CC=C1C2=CN3C=CC=CC3=N2
O=C(NC1=CC=CC=C1C2=CN3C=CC=CC3=N2)C
O=C(NC1=CC=CC=C1C2=CN3C=CC=CC3=N2)C4=CC=CC=C4
O=C(NC1=CC=CC2=C1C3=C(C=C2)C=CC=N3)C
O=C(NC1=CC=CC2=C1C3=C(C=C2)C=CC=N3)C4=CC=CC=C4
O=C(NC1=CC=CC=C1C2=CN3C=CC=CC3=N2)C(F)(F)F
CC1=CC=C(S(NC2=CC=CC=C2C3=CN4C=CC=CC4=N3)(=O)=O)C=C1
CC1=CC=C(S(NC2=CC=CC3=C2C4=C(C=C3)C=CC=N4)(=O)=O)C=C1
O=C(NC1=CC=CC2=C1C3=C(C=C2)C=CC=N3)C(F)(F)F
NC1=C2C(CC3=C2N=C4C5=C3CCC5=CC=C4)=CC=C1	10.1039/D0CP03408H
CNC1=C2C(CC3=C2N=C4C5=C3CCC5=CC=C4)=CC=C1
CC(NC1=C2C(CC3=C2N=C4C5=C3CCC5=CC=C4)=CC=C1)=O
CC1=CC=C(S(NC2=C3C(CC4=C3N=C5C6=C4CCC6=CC=C5)=CC=C2)(=O)=O)C=C1
OC1=C2C(CC3=C2N=C4C5=C3CCC5=CC=C4)=CC=C1
CC1(C)C(C2=C(C3=CC=CN3)N4C(C=CC4)=C2)=NC5=C1C=CC6=C5C=CC=C6	10.1021/acs.jpcb.1c07438
CC1(C)C(C2=C(C3=CC=CN3)N4C(C=CC4)=C2)=NC5=C1C(C=CC=C6)=C6C=C5
OC1=C2C(C=CC(C(/C=C/C3=CC(CCC4)=C(N4CCC5)C5=C3)=O)=C2O)=CC6=CC=CC=C61	10.1002/anie.202210422
OC1=C2C(C=CC(C(/C=C/C3=CC=C(N(C)C)C=C3OC)=O)=C2O)=CC=C1	10.1002/adfm.202214308
CC1=CC(C)=NN1C2=NC(C3=C(O)C=CC=C3)=NC(C)=C2	10.1039/D3NJ00570D
OC1=C(C2=NC(C)=CC(N3N=C(C4=CC=CC=C4)C=C3C5=CC=CC=C5)=N2)C=CC=C1
OC1=CC=CC=C1C2=NC=CO2	10.1021/acs.jpclett.2c01025
OC1=CC=C(C2=CC=C(N(C3=CC=CC=C3)C4=CC=CC=C4)C=C2)C=C1C5=NC=C(C6=CC=CC=C6)O5
OC1=CC=C(C2=CC=C(N(C3=CC=CC=C3)C4=CC=CC=C4)C=C2)C=C1C5=NC=C(C6=CC=C(C7=CC=C(C8=CC=CC=C8)C=C7)C=C6)O5
OC1=CC=C(C2=CC=CC=C2)C=C1C3=NC=C(C4=CC=C(C(C=C5)=CC=C5N(C6=CC=CC=C6)C7=CC=CC=C7)C=C4)O3
OC1=CC=C(C2=CC=C(N(C3=CC=CC=C3)C4=CC=CC=C4)C=C2)C=C1C5=NC=C(C6=CC=C(C(C=C7)=CC=C7N(C8=CC=CC=C8)C9=CC=CC=C9)C=C6)O5
OC1=CC=CC=C1C2=NC=C(C3=CC=C(C4=CC=C(N(C5=CC=CC=C5)C6=CC=CC=C6)C=C4)C=C3)O2
OC1=CC=C2C(C=CC=C2)=C1C3=NC4=C(N3C5=CC=CC=C5)C6=C(N=CC=C6)C7=C4C=CC=N7	10.1039/D1SC07250A
O=C(C=C1)OC(C1=CC=C2O)=C2C3=NC4=C(S3)C=CC=C4	10.1039/D2ME00263A
O=C(C=C1N)OC(C1=CC=C2O)=C2C3=NC4=C(S3)C=CC=C4
O=C(C=C1O)OC(C1=CC=C2O)=C2C3=NC4=C(S3)C=CC=C4
O=C(C=C1OC)OC(C1=CC=C2O)=C2C3=NC4=C(S3)C=CC=C4
O=C(C=C1C)OC(C1=CC=C2O)=C2C3=NC4=C(S3)C=CC=C4
O=C(C=C1C(F)(F)F)OC(C1=CC=C2O)=C2C3=NC4=C(S3)C=CC=C4
O=C(C=C1[N+]([O-])=O)OC(C1=CC=C2O)=C2C3=NC4=C(S3)C=CC=C4
O=C(C=C1C#N)OC(C1=CC=C2O)=C2C3=NC4=C(S3)C=CC=C4
