# Supplementary material for: Unveiling key descriptors via machine learning: toward rational molecular design of chromophores with excited-state intramolecular proton transfer
Source: Chem Sci. 2026 Feb 9;17(14):7146–56. doi: 10.1039/d5sc07051a (PMC12910287; doi:10.1039/d5sc07051a)
Supplement: SC-017-D5SC07051A-s003 [file SC-017-D5SC07051A-s003.xlsx]

## Sheet: Sheet1
Unveiling Key Descriptors via Machine Learning: Toward Rational Molecular Design of Chromophores with Excited-State Intramolecular Proton Transfer Shengsheng Wei,1 Zipeng Yang,1 Chao Yang,1 Hongmei Zhao,1 Yang Li,1 Yuanyuan Guo,1 Andong Xia,1* Zhuoran Kuang,1* 1. State Key Laboratory of Information Photonic and Optical Communications, and School of Science, Beijing University of Posts and Telecom…
									Configuration
XGboost		CV-1	CV-2	CV-3	CV-4	CV-5	Avg		n_estimators, learning_rate, max_depth
	AtomPair								250, 0.07, 5
	RMSE	2.21	1.79	2.05	2.66	2.58	2.258
	MAE	1.53	1.3	1.4	1.75	1.75	1.546
	R2	0.85	0.92	0.89	0.81	0.79	0.85
	Morgan								250, 0.07, 4
	RMSE	3.45	3.25	3.52	3.12	2.97	3.262
	MAE	2.57	2.49	2.61	2.32	2.21	2.44
	R2	0.65	0.74	0.61	0.75	0.72	0.694
	RDKit								250, 0.07, 4
	RMSE	3.37	3.53	3.89	3.19	3.7	3.536
	MAE	2.43	2.52	2.92	2.32	2.7	2.578
	R2	0.7	0.68	0.51	0.73	0.51	0.626
	TopologicalTorsion								250, 0.07, 4
	RMSE	3.41	3.33	3.06	3.58	3.86	3.448
	MAE	2.6	2.69	2.47	2.77	3.19	2.744
	R2	0.69	0.62	0.72	0.59	0.62	0.648
	Quantitative descriptors								250, 0.07, 4
	RMSE	2.99	2.89	2.76	2.84	2.7	2.84
	MAE	2.29	2.29	2.16	2.25	1.94	2.19
	R2	0.74	0.72	0.78	0.78	0.8	0.76
	MACCS								250, 0.05, 2
	RMSE	3.33	3.36	2.69	3.61	3.17	3.23
	MAE	2.58	2.6	2.07	2.88	2.37	2.5
	R2	0.59	0.73	0.74	0.65	0.73	0.69
	DMPNN								350, 0.01, 2
	RMSE	3.59	3.28	3.55	3.69	3.06	3.44
	MAE	2.87	2.65	2.82	2.99	2.49	2.76
	R2	0.61	0.61	0.67	0.62	0.74	0.65
	Key descriptors								250, 0.07, 5
	RMSE	2.39	2.3	2.73	2.46	1.71	2.32
	MAE	1.63	1.63	1.7	1.51	1.22	1.54
	R2	0.82	0.81	0.78	0.83	0.9	0.83
Bagging		CV-1	CV-2	CV-3	CV-4	CV-5	Avg		n_estimators, min_samples_leaf, random_state, max_depth
	AtomPair								300, 1, 0, 10
	RMSE	2.48	2.82	3	2.6	2.5	2.68
	MAE	1.88	1.92	2.19	1.79	1.82	1.92
	R2	0.82	0.78	0.79	0.77	0.8	0.79
	Morgan								300, 1, 0, 5
	RMSE	3	3.32	3.28	3.05	2.96	3.12
	MAE	2.29	2.59	2.49	2.31	2.24	2.38
	R2	0.72	0.71	0.73	0.71	0.71	0.72
	RDKit								300, 1, 0, 5
	RMSE	3.32	3.22	3.56	3.01	3.15	3.25
	MAE	2.61	2.49	2.57	2.26	2.49	2.48
	R2	0.69	0.65	0.67	0.75	0.7	0.69
	TopologicalTorsion								300, 1, 0, 5
	RMSE	3.27	3.45	3.28	3.46	3.35	3.36
	MAE	2.58	2.7	2.65	2.7	2.66	2.66
	R2	0.7	0.69	0.68	0.59	0.68	0.67
	Quantitative descriptors								300, 1, 0, 10
	RMSE	3.21	3.09	3.07	2.67	3.24	3.06
	MAE	2.62	2.35	2.38	2.05	2.59	2.4
	R2	0.74	0.71	0.7	0.77	0.71	0.73
	MACCS								300, 1, 0, 5
	RMSE	3.13	3.42	3.21	3.17	3.54	3.29
	MAE	2.45	2.7	2.4	2.53	2.74	2.56
	R2	0.71	0.63	0.69	0.75	0.62	0.68
	DMPNN								300, 1, 0, 5
	RMSE	3.47	3.62	3.3	3.45	3.49	3.47
	MAE	2.79	2.82	2.6	2.69	2.66	2.71
	R2	0.62	0.61	0.67	0.63	0.7	0.65
	Key descriptors								300, 2, 0, 10
	RMSE	2.19	2.69	2.52	1.97	2.15	2.3
	MAE	1.42	1.68	1.61	1.34	1.44	1.5
	R2	0.85	0.77	0.79	0.88	0.85	0.83
AdaBoost		CV-1	CV-2	CV-3	CV-4	CV-5	Avg		n_estimators, min_samples_leaf, random_state, max_depth
	AtomPair								300, 1, 0, 10
	RMSE	2.73	2.81	2.76	2.33	2.61	2.65
	MAE	1.92	1.99	1.8	1.64	1.68	1.8
	R2	0.8	0.76	0.8	0.82	0.8	0.8
	Morgan								300, 1, 0, 10
	RMSE	3.64	2.99	3.04	3.06	3.27	3.2
	MAE	2.89	2.43	2.55	2.48	2.55	2.58
	R2	0.71	0.68	0.67	0.74	0.69	0.7
	RDKit								300, 1, 0, 10
	RMSE	3.11	3.49	3.06	3.23	2.95	3.17
	MAE	2.41	2.8	2.47	2.49	2.33	2.5
	R2	0.72	0.71	0.74	0.67	0.7	0.71
	TopologicalTorsion								300, 1, 0, 10
	RMSE	3.42	3.66	3.42	3.42	3.54	3.49
	MAE	2.84	2.87	2.62	2.83	2.85	2.8
	R2	0.64	0.66	0.66	0.67	0.59	0.64
	Quantitative descriptors								300, 1, 0, 10
	RMSE	2.94	3.71	3.18	2.89	3.64	3.27
	MAE	2.19	2.79	2.37	2.2	2.83	2.48
	R2	0.72	0.63	0.68	0.75	0.65	0.69
	MACCS								300, 1, 0, 5
	RMSE	3.77	3.43	3.4	3.37	3.57	3.51
	MAE	3.03	2.75	2.77	2.72	2.95	2.84
	R2	0.53	0.63	0.68	0.69	0.66	0.64
	DMPNN								300, 1, 0, 5
	RMSE	3.56	3.66	3.39	3.67	3.74	3.6
	MAE	2.82	2.94	2.64	2.97	2.98	2.87
	R2	0.57	0.62	0.68	0.67	0.55	0.62
	Key descriptors								300, 1, 0, 10
	RMSE	2.17	2.09	2.15	2.02	2.5	2.19
	MAE	1.3	1.3	1.34	1.14	1.34	1.28
	R2	0.85	0.84	0.85	0.9	0.78	0.84
KNearestNeighbors		CV-1	CV-2	CV-3	CV-4	CV-5	Avg		n_neighbors, weights, leaf_size
	AtomPair								10, "uniform", 5
	RMSE	3.51	3.49	3.41	3.88	3.15	3.49
	MAE	2.65	2.65	2.58	2.9	2.4	2.64
	R2	0.66	0.64	0.66	0.59	0.69	0.65
	Morgan								10, "uniform", 5
	RMSE	3.69	3.94	4.33	3.84	3.85	3.93
	MAE	2.78	2.86	3.27	2.88	2.97	2.95
	R2	0.61	0.55	0.51	0.55	0.54	0.55
	RDKit								10, "uniform", 5
	RMSE	4.12	3.89	4.16	3.88	3.82	3.97
	MAE	2.96	2.96	3.17	2.94	2.94	3
	R2	0.57	0.55	0.52	0.56	0.49	0.54
	TopologicalTorsion								10, "uniform", 5
	RMSE	3.76	4.2	4.51	3.56	3.98	4
	MAE	2.85	3.22	3.29	2.73	2.98	3.01
	R2	0.5	0.51	0.43	0.65	0.57	0.53
	Quantitative descriptors								10, "uniform", 5
	RMSE	4.1	4.29	3.71	4.11	3.98	4.04
	MAE	3.06	3.25	2.87	3.18	2.89	3.05
	R2	0.56	0.4	0.6	0.52	0.53	0.52
	MACCS								10, "uniform", 5
	RMSE	3.8	3.46	3.78	3.49	3.95	3.7
	MAE	2.68	2.65	2.89	2.81	3.03	2.81
	R2	0.6	0.63	0.57	0.58	0.62	0.6
	DMPNN								10, "uniform", 5
	RMSE	3.42	3.12	3.26	3.09	3.72	3.32
	MAE	2.62	2.45	2.53	2.46	2.96	2.6
	R2	0.68	0.72	0.66	0.74	0.59	0.68
	Key descriptors								10, "uniform", 5
	RMSE	2.78	2.71	2.77	3.25	2.65	2.83
	MAE	1.92	1.97	1.77	2.17	1.84	1.93
	R2	0.76	0.72	0.75	0.7	0.79	0.74
SupportingVectorMachine		CV-1	CV-2	CV-3	CV-4	CV-5	Avg		C, kernel, gamma
	AtomPair								5.0, 'rbf', 0.01
	RMSE	3.01	3.11	2.98	2.97	3.25	3.07
	MAE	2.23	2.02	2.13	2.24	2.3	2.18
	R2	0.75	0.71	0.72	0.74	0.71	0.73
	Morgan								5.0, 'rbf', 0.01
	RMSE	3.66	3.37	3.61	2.98	3.74	3.47
	MAE	2.65	2.66	2.69	2.23	2.74	2.59
	R2	0.65	0.69	0.55	0.69	0.66	0.65
	RDKit								5.0, 'rbf', 0.01
	RMSE	3.48	3.76	3.54	3	3.81	3.52
	MAE	2.61	2.91	2.65	2.21	2.82	2.64
	R2	0.65	0.65	0.64	0.67	0.6	0.64
	Topological Torsion								5.0, 'rbf', 0.05
	RMSE	3.93	3.31	3.6	3.72	3.96	3.7
	MAE	2.9	2.56	2.65	2.77	2.94	2.76
	R2	0.55	0.66	0.61	0.59	0.59	0.6
	Quantitative descriptors								3.0, 'rbf', 0.003
	RMSE	3.77	3.57	3.58	3.55	3.49	3.59
	MAE	2.81	2.83	2.68	2.69	2.7	2.74
	R2	0.62	0.65	0.65	0.55	0.65	0.62
	MACCS								5.0, 'rbf', 0.05
	RMSE	3.72	3.33	3.71	3.67	3.15	3.52
	MAE	2.77	2.52	2.84	2.88	2.36	2.67
	R2	0.63	0.61	0.65	0.61	0.7	0.64
	DMPNN								5.0, 'rbf', 'auto'
	RMSE	3.33	3.26	3.12	3.64	3.52	3.37
	MAE	2.47	2.43	2.48	2.79	2.67	2.57
	R2	0.67	0.65	0.67	0.68	0.67	0.67
	Key descriptors								5.0, 'rbf', 10
	RMSE	3.16	3.36	3.28	3.03	3.59	3.28
	MAE	2.25	2.12	2.31	2.13	2.37	2.24
	R2	0.63	0.67	0.68	0.71	0.58	0.65
Extra Trees		CV-1	CV-2	CV-3	CV-4	CV-5	Avg		n_estimators, min_samples_leaf, random_state, max_depth
	AtomPair								400, 5, 0, 15
	RMSE	3.08	2.73	3.62	3.18	3.85	3.29
	MAE	1.97	1.85	2.39	2.16	2.39	2.15
	R2	0.7	0.78	0.61	0.67	0.64	0.68
	Morgan								400, 5, 0, 15
	RMSE	3.44	2.91	3.33	3.09	3.37	3.23
	MAE	2.73	2.28	2.52	2.33	2.52	2.47
	R2	0.68	0.76	0.64	0.72	0.67	0.7
	RDKit								400, 5, 0, 15
	RMSE	3.96	3.52	3.71	3.12	3.49	3.56
	MAE	2.99	2.68	2.84	2.4	2.69	2.72
	R2	0.46	0.67	0.65	0.67	0.67	0.62
	TopologicalTorsion								250, 5, 0, 10
	RMSE	3.48	3.29	4.07	3.33	3.69	3.57
	MAE	2.71	2.55	3.11	2.59	2.79	2.75
	R2	0.66	0.64	0.6	0.68	0.57	0.63
	Quantitative descriptors								300, 1, 0, 5
	RMSE	3.33	3.05	3.33	3.24	3.02	3.19
	MAE	2.49	2.39	2.56	2.49	2.33	2.45
	R2	0.7	0.76	0.64	0.68	0.7	0.7
	MACCS								400, 5, 0, 15
	RMSE	3.87	3.73	3.54	3.47	2.93	3.51
	MAE	2.9	2.82	2.7	2.84	2.34	2.72
	R2	0.6	0.59	0.66	0.62	0.73	0.64
	DMPNN								300, 1, 0, 5
	RMSE	3.26	3.11	3.71	3.49	3.42	3.4
	MAE	2.53	2.52	2.94	2.81	2.68	2.69
	R2	0.65	0.67	0.66	0.68	0.65	0.66
	Key descriptors								300, 1, 0, 15
	RMSE	1.83	2.25	2.3	1.63	2.07	2.02
	MAE	1.19	1.25	1.36	1.08	1.44	1.26
	R2	0.9	0.84	0.84	0.91	0.85	0.87
RandomForests		CV-1	CV-2	CV-3	CV-4	CV-5	Avg		n_estimators, min_samples_leaf, random_state, max_depth
	AtomPair								300, 1, 0, 10
	RMSE	2.57	3.13	2.66	2.59	2.51	2.69
	MAE	1.95	2.05	1.89	1.93	1.88	1.94
	R2	0.79	0.73	0.78	0.83	0.82	0.79
	Morgan								300, 1, 0, 5
	RMSE	3.19	3.14	2.78	3.09	3.42	3.12
	MAE	2.48	2.34	2.2	2.33	2.64	2.4
	R2	0.72	0.71	0.76	0.72	0.67	0.72
	RDKit								300, 1, 0, 5
	RMSE	3.41	3.14	3.49	3.16	3.2	3.28
	MAE	2.52	2.44	2.77	2.37	2.53	2.52
	R2	0.69	0.7	0.68	0.66	0.69	0.69
	TopologicalTorsion								300, 1, 0, 5
	RMSE	3.28	3.48	3.41	3.2	3.8	3.43
	MAE	2.56	2.73	2.75	2.48	3.06	2.72
	R2	0.68	0.6	0.64	0.72	0.64	0.65
	Quantitative descriptors								300, 1, 0, 5
	RMSE	3.42	3.11	3.04	2.87	3.25	3.14
	MAE	2.66	2.5	2.29	2.16	2.56	2.44
	R2	0.7	0.73	0.69	0.74	0.7	0.71
	MACCS								300, 1, 0, 5
	RMSE	2.97	3.37	3.43	3.44	3.24	3.29
	MAE	2.28	2.6	2.72	2.73	2.43	2.55
	R2	0.73	0.66	0.63	0.66	0.72	0.68
	DMPNN								300, 1, 0, 5
	RMSE	3.38	3.51	3.29	4.04	3.4	3.52
	MAE	2.65	2.8	2.51	3.12	2.76	2.77
	R2	0.61	0.68	0.67	0.6	0.63	0.64
	Key descriptors								300, 1, 0, 10
	RMSE	2.39	2.46	2.1	2.3	2.47	2.34
	MAE	1.56	1.54	1.47	1.55	1.52	1.53
	R2	0.81	0.82	0.84	0.84	0.81	0.83
GradientBoosting		CV-1	CV-2	CV-3	CV-4	CV-5	Avg		n_estimators, max_depth, min_samples_split, learning_rate
	AtomPair								300, 5, 10, 0.05
	RMSE	2.14	1.9	2.27	2.59	2.56	2.29
	MAE	1.57	1.3	1.67	1.77	1.66	1.6
	R2	0.86	0.88	0.85	0.81	0.83	0.85
	Morgan								300, 5, 10, 0.05
	RMSE	3.53	3.01	3.02	3.28	3.1	3.19
	MAE	2.65	2.33	2.18	2.39	2.33	2.38
	R2	0.63	0.73	0.77	0.68	0.7	0.7
	RDKit								300, 5, 10, 0.05
	RMSE	3.18	3.5	3.5	3.71	3.41	3.46
	MAE	2.24	2.47	2.44	2.81	2.55	2.5
	R2	0.66	0.68	0.63	0.61	0.67	0.65
	TopologicalTorsion								300, 5, 10, 0.02
	RMSE	3.52	3.56	3.83	3.54	2.97	3.48
	MAE	2.67	2.82	2.94	2.8	2.31	2.71
	R2	0.68	0.65	0.61	0.61	0.67	0.65
	Quantitative descriptors								300, 5, 10, 0.02
	RMSE	3.19	3.24	2.6	3.23	2.54	2.96
	MAE	2.46	2.42	1.89	2.45	1.93	2.23
	R2	0.7	0.68	0.78	0.76	0.8	0.74
	MACCS								300, 5, 10, 0.01
	RMSE	2.81	3.4	3.29	3.56	3.26	3.26
	MAE	2.19	2.72	2.65	2.75	2.52	2.57
	R2	0.75	0.64	0.72	0.66	0.68	0.69
	DMPNN								300, 2, 10, 0.02
	RMSE	3.36	3.52	3.47	3.51	3.09	3.39
	MAE	2.63	2.79	2.81	2.84	2.48	2.71
	R2	0.62	0.66	0.67	0.7	0.66	0.66
	Key descriptors								300, 8, 10, 0.03
	RMSE	2.36	2.75	2.41	2.37	1.93	2.36
	MAE	1.35	1.68	1.5	1.47	1.28	1.46
	R2	0.81	0.81	0.79	0.78	0.9	0.82
DecisionTree		CV-1	CV-2	CV-3	CV-4	CV-5	Avg		min_samples_leaf, random_state, max_depth
	AtomPair								5, 0, 10
	RMSE	2.82	3.1	3.62	3.15	3.21	3.18
	MAE	2.06	2.07	2.57	2.28	2.24	2.24
	R2	0.78	0.67	0.67	0.72	0.67	0.7
	Morgan								5, 0, 10
	RMSE	3.22	3.39	3.21	3.63	3.13	3.32
	MAE	2.5	2.69	2.37	2.65	2.39	2.52
	R2	0.69	0.66	0.68	0.6	0.75	0.68
	RDKit								5, 0, 10
	RMSE	3.35	3.6	3.94	3.71	3.45	3.61
	MAE	2.61	2.8	2.93	2.75	2.68	2.75
	R2	0.68	0.58	0.54	0.62	0.68	0.62
	TopologicalTorsion								5, 0, 10
	RMSE	3.62	4.01	3.08	3.55	3.45	3.54
	MAE	2.86	3	2.55	2.69	2.67	2.75
	R2	0.64	0.45	0.73	0.66	0.66	0.63
	Quantitative descriptors								5, 0, 10
	RMSE	3.79	3.59	3.35	3.89	3.26	3.57
	MAE	2.79	2.75	2.69	2.84	2.5	2.71
	R2	0.61	0.62	0.68	0.57	0.65	0.63
	MACCS								2, 0, 5
	RMSE	3.23	3.59	3.43	3.6	3.45	3.46
	MAE	2.58	2.7	2.63	2.78	2.72	2.68
	R2	0.67	0.64	0.68	0.64	0.63	0.65
	DMPNN								5, 0, 3
	RMSE	3.59	3.6	3.9	3.73	3.56	3.68
	MAE	2.77	2.85	3.01	2.89	2.77	2.86
	R2	0.67	0.62	0.52	0.62	0.59	0.6
	Key descriptors								1, 0, 10
	RMSE	2.96	3.06	2.94	2.95	2.9	2.96
	MAE	1.82	2.01	1.89	1.8	1.94	1.89
	R2	0.74	0.7	0.7	0.72	0.74	0.72
MLP		CV-1	CV-2	CV-3	CV-4	CV-5	Avg		learning_rate=0.01
	AtomPair								network = Sequential([
	RMSE	2.67	2.19	2.43	2.47	2.73	2.5		layers.BatchNormalization(), (used for quantitative descriptors)
	MAE	2	1.53	1.54	1.78	1.79	1.73		layers.Dense(400, activation='relu'),
	R2	0.79	0.85	0.85	0.82	0.76	0.81		layers.Dense(200, activation='relu'),
	Morgan								layers.BatchNormalization(), (used for quantitative descriptors and DMPNN)
	RMSE	3.61	3.14	3.66	3.3	3.69	3.48		layers.Dense(100, activation='relu'),
	MAE	2.64	2.39	2.74	2.38	2.56	2.54		layers.Dense(50, activation='relu'),
	R2	0.68	0.73	0.56	0.69	0.55	0.64		layers.Dense(1)])
	RDKit								epochs=50,
	RMSE	3.66	3.53	2.94	3.19	3.72	3.41
	MAE	2.81	2.64	2.17	2.42	2.75	2.56
	R2	0.63	0.61	0.75	0.68	0.63	0.66
	TopologicalTorsion
	RMSE	3.58	3.59	3.77	3.53	3.86	3.67
	MAE	2.7	2.79	2.8	2.78	2.88	2.79
	R2	0.61	0.61	0.56	0.6	0.64	0.61
	Quantitative descriptors
	RMSE	2.96	3.63	3.6	3.69	3.18	3.41
	MAE	2.25	2.85	2.54	2.7	2.44	2.56
	R2	0.73	0.64	0.63	0.62	0.69	0.66
	MACCS
	RMSE	3.22	4.19	3.12	4	3.81	3.67
	MAE	2.43	3.22	2.46	2.94	2.99	2.81
	R2	0.64	0.5	0.76	0.58	0.49	0.6
	DMPNN
	RMSE	3.5	3.59	3.37	3.66	3.84	3.59
	MAE	2.56	2.86	2.65	2.87	2.87	2.76
	R2	0.62	0.6	0.67	0.58	0.65	0.62
	Key descriptors
	RMSE	3.06	3.17	2.88	2.89	3.15	3.03
	MAE	2.15	2.02	2.03	2	2.23	2.09
	R2	0.7	0.68	0.71	0.75	0.7	0.71
MolGraphConvFeaturizer			CV1	CV2	CV3	CV4	CV5	Avg
	AttentiveFPModel	RMSE	3.05	3.43	3.3	3.36	3.16	3.26
		MAE	2.46	2.82	2.57	2.59	2.5	2.59
		R2	0.74	0.68	0.7	0.74	0.7	0.71
	GATModel	RMSE	3.66	4.24	4.7	3.86	3.61	4.01
		MAE	3.09	3.49	3.67	3.19	2.99	3.28
		R2	0.63	0.6	0.57	0.6	0.61	0.6
	GCNModel	RMSE	3.03	3.28	3.69	4.87	3.13	3.6
		MAE	2.46	2.66	2.92	3.15	2.45	2.73
		R2	0.73	0.66	0.66	0.46	0.7	0.64
PagtnMolGraphFeaturizer			CV1	CV2	CV3	CV4	CV5	Avg
	PagtnModel	RMSE	4.4	3.75	4.25	4.25	3.86	4.1
		MAE	3.47	2.87	3.47	3.35	2.85	3.2
		R2	0.6	0.66	0.58	0.64	0.51	0.6
ConvMolFeaturizer			CV1	CV2	CV3	CV4	CV5	Avg
	GraphConvModel	RMSE	2.98	3.59	3.37	3.76	3.14	3.37
		MAE	2.45	2.74	2.7	2.95	2.53	2.67
		R2	0.7	0.69	0.74	0.63	0.68	0.69
