# Supplementary material for: Unveiling key descriptors via machine learning: toward rational molecular design of chromophores with excited-state intramolecular proton transfer
Source: Chem Sci. 2026 Feb 9;17(14):7146–56. doi: 10.1039/d5sc07051a (PMC12910287; doi:10.1039/d5sc07051a)
Supplement: SC-017-D5SC07051A-s004 [file SC-017-D5SC07051A-s004.xlsx]

## Sheet: matched_from_df4
Unveiling Key Descriptors via Machine Learning: Toward Rational Molecular Design of Chromophores with Excited-State Intramolecular Proton Transfer Shengsheng Wei,1 Zipeng Yang,1 Chao Yang,1 Hongmei Zhao,1 Yang Li,1 Yuanyuan Guo,1 Andong Xia,1* Zhuoran Kuang,1* 1. State Key Laboratory of Information Photonic and Optical Communications, and School of Science, Beijing University of Posts and Telecom…
safety was evaluated based on four commonly assessed parameters: AMES toxicity, skin sensitization, hERG inhibition, and the potential for drug-induced liver injury (DILI). safety score was assigned according to these parameters, with values of +1 for “Excellent,” +0.5 for “Medium,” and +0 for “Poor.” Pharmacokinetic evaluation involved five parameters: VDss, Fu, CL, T1/2, and PPB, using the same…
smiles	SA scores	logS	logD	PPB	logVDss	Fu	cl-plasma	t0.5	Pharmacokinetics score	hERG	DILI	Ames	SkinSen	Safety score	Total score (Pharmacokinetics score+Safety score)	pre_ΔE*
NC(=O)c1n[nH]c2c1ccc1cccnc12	2.517	-2.61795	1.25574	86.9574	0.131918	10.9609	4.42433	1.38965	4	0.231845	0.958027	0.868315	0.173557	2	6	-8.3574
O=C(c1ccc(C(F)(F)F)cc1)c1ccccc1O	1.725	-4.86971	3.80979	98.3755	-0.333441	0.949927	7.44495	0.866709	1.5	0.186255	0.379315	0.231465	0.272484	3.5	5	-5.28524
O=c1c(O)c(-c2ccc(C(F)(F)F)cc2)oc2ccccc12	2.059	-4.07109	3.06709	97.7246	-0.0820541	1.27914	6.75589	1.07971	2	0.1968	0.720024	0.227529	0.195747	3	5	-7.03341
O=CNc1n[nH]c2c1ccc1cccnc12	2.769	-2.42152	1.65267	92.3702	0.0272532	7.11347	2.98649	1.18623	3	0.102356	0.953264	0.837875	0.172427	2	5	-9.59925
CC1=NC(=Cc2ccccc2NC=O)C(=O)N1C (Compound 5)	2.861	-2.68354	1.14579	70.6542	0.190782	29.1107	7.65068	1.61364	4	0.0877935	0.965064	0.945329	0.981696	1	5	-4.07682
Cc1oc2ccccc2c(=O)c1O	2.116	-2.16289	1.4625	95.1845	-0.514142	4.45254	6.80769	1.21161	2	0.0906218	0.599454	0.619473	0.544092	2.5	4.5	-5.45835
O=c1c(O)c(-c2ccc(C(F)(F)F)cc2)oc2ccc(-c3ccccc3)cc12	2.132	-4.64935	3.38572	97.9235	0.27907	0.654424	6.59791	1.03701	2	0.354393	0.865466	0.231707	0.0860036	2.5	4.5	-6.19713
O=C(Nc1ccccc1-c1cn2ccccc2n1)C(F)(F)F	2.286	-3.6666	2.48174	96.8383	0.233822	2.37747	4.04912	1.1764	2.5	0.153676	0.644402	0.679292	0.706161	2	4.5	-10.3063
O=C(Nc1ccccc1-c1ccccn1)c1cc(-c2nc3ccccc3o2)cc(C(F)(F)F)c1	2.315	-6.55495	4.24989	98.1299	0.290203	1.25968	2.12653	1.08278	2.5	0.57173	0.963282	0.313461	0.260742	2	4.5	-7.96631
O=C(Nc1ccc(Cl)cc1-c1ccccn1)c1cc(-c2nc3ccccc3o2)cc(C(F)(F)F)c1	2.405	-6.7764	4.40427	98.8163	-0.0281511	0.539596	1.56586	1.1438	2.5	0.735436	0.983557	0.238181	0.130474	2	4.5	-8.32064
N#CC(=Cc1ccc2nc(-c3ccccc3O)oc2c1)C(=O)O	2.458	-3.76688	2.49551	98.6468	-0.585124	0.851093	2.77122	1.04732	2.5	0.0277595	0.953947	0.344746	0.543688	2	4.5	-7.10436
N#CC(=O)c1ccc(O)c(-c2nc3ccc(-c4ccc(C(F)(F)F)cc4)cc3o2)c1	2.569	-6.60592	4.13982	97.9668	0.480231	1.196	5.34172	0.836084	1.5	0.25638	0.959592	0.125684	0.015842	3	4.5	3.52654
O=COc1n[nH]c2c1ccc1cccnc12	2.921	-2.54658	2.04938	90.1458	-0.0289782	6.48104	3.97015	1.04976	3	0.130823	0.962424	0.787314	0.427111	1.5	4.5	-9.80274
CC(=O)Nc1ccccc1-c1nc2ccccc2s1	1.793	-4.20379	3.22221	97.0667	0.277157	2.42271	3.16656	0.501405	2	0.0865435	0.943986	0.683709	0.582617	2	4	-8.00977
O=CNc1ccc(Cl)cc1-c1ccccc1	1.847	-3.87778	2.99283	98.7156	-0.460209	0.466416	6.28527	1.01696	2	0.213835	0.929068	0.554591	0.604077	2	4	-9.12654
O=c1c(O)c(-c2ccc(-c3ccccc3)cc2)oc2ccccc12	1.852	-4.36984	3.17912	98.1667	-0.24319	0.689776	4.71709	0.841623	2	0.304992	0.914372	0.661501	0.194483	2	4	-8.61098
O=C(Nc1ccccc1-c1ccccc1)c1nc2ccccc2o1	1.87	-4.48124	3.35776	97.2439	0.0405123	2.37903	3.78586	0.621455	2	0.474105	0.948725	0.658198	0.284562	2	4	-10.2649
O=c1c(O)c(-c2ccc(Cl)cc2)oc2ccccc12	1.886	-4.30143	2.73109	98.9643	-0.657757	0.412241	4.08856	0.821004	2	0.217533	0.916203	0.374461	0.603273	2	4	-6.26807
O=C(Nc1ccc(C(F)(F)F)cc1)c1nc2ccccc2[nH]1	1.949	-5.30955	3.93978	97.7153	-0.0280439	1.77313	6.32001	0.613251	1.5	0.283963	0.762914	0.489134	0.222445	2.5	4	-10.1828
O=c1c(O)c(-c2ccc(-c3ccccc3)cc2)oc2ccc(-c3ccccc3)cc12	1.993	-5.4206	3.67355	97.976	-0.0554481	0.493047	4.61345	0.840649	2	0.490794	0.966624	0.670298	0.0852682	2	4	-4.43716
O=C(Nc1ccc(Cl)cc1-c1ccccc1)c1nc2ccccc2o1	1.994	-5.13781	3.85182	98.6007	-0.345222	0.567147	3.57536	0.615772	2	0.630815	0.976659	0.558354	0.198961	2	4	-7.60018
O=C(Nc1ccccc1C(F)(F)F)c1nc2ccccc2[nH]1	2.015	-4.50133	3.4512	98.0583	0.0297935	1.30288	5.55579	0.897157	1.5	0.214897	0.641899	0.599875	0.338076	2.5	4	-8.20521
Oc1ccc(-c2ccc(C(F)(F)F)cc2)cc1-c1nc2ccccc2o1	2.109	-6.30045	4.27073	97.8033	0.557637	1.13249	6.72554	0.708969	1.5	0.448667	0.856777	0.20961	0.133188	2.5	4	-3.96426
O=C(Nc1ccc(Cl)cc1C(Cl)Cl)c1ccccc1O	2.113	-5.57428	3.7136	99.2006	-0.60359	0.349993	3.51938	0.985417	2	0.162508	0.0853224	0.802179	0.999457	2	4	-3.32531
Oc1cc(-c2ccc(C(F)(F)F)cc2)ccc1-c1nc2ccccc2o1	2.121	-6.34165	4.21257	97.3215	0.485948	1.46181	6.12489	0.614446	1.5	0.419445	0.831001	0.208043	0.133247	2.5	4	-7.81338
O=c1c(O)c(-c2ccccc2)oc2ccc(-c3ccc(C(F)(F)F)cc3)cc12	2.132	-4.73431	3.36658	98.0635	0.290271	0.578512	6.38843	0.964551	1.5	0.3858	0.940875	0.230926	0.0751485	2.5	4	-7.67122
O=c1c(O)c(-c2ccc(Cl)cc2-c2ccccc2)oc2ccc(-c3ccccc3)cc12	2.146	-4.91235	3.23726	99.1158	-0.353079	0.12819	3.91673	0.743017	2	0.503403	0.969852	0.36959	0.277136	2	4	-4.64749
O=C(Nc1ccc(Cl)cc1C(F)(F)F)c1nc2ccccc2o1	2.171	-5.17384	3.89271	98.8701	-0.142843	0.727003	4.82454	0.757788	2	0.493254	0.919937	0.370103	0.290809	2	4	-5.55215
O=CNc1ccc(Cl)cc1-c1nc2ccccc2s1	2.186	-4.7626	3.6037	99.083	-0.263946	0.574504	4.95007	0.572164	2	0.149345	0.983179	0.669285	0.500181	2	4	-11.1725
O=CNc1ccc(-c2oc3ccccc3c(=O)c2O)cc1	2.194	-3.63617	1.83928	98.6942	-0.687372	1.12124	4.51697	0.981198	2	0.07316	0.983693	0.852043	0.281008	2	4	-7.96682
O=c1c(O)c(-c2ccc(Cl)cc2C(F)(F)F)oc2ccccc12	2.273	-4.39076	3.15737	99.261	-0.367527	0.351055	5.03241	0.967809	1.5	0.223814	0.809748	0.19671	0.49061	2.5	4	-5.46724
Oc1ccc(-c2ccc(Cl)cc2C(F)(F)F)cc1-c1nc2ccccc2s1	2.281	-6.5029	3.95682	99.3611	0.249651	0.240954	5.8484	0.593654	1.5	0.479398	0.852566	0.284264	0.279702	2.5	4	-3.35201
Oc1cc(-c2ccc(Cl)cc2C(F)(F)F)ccc1-c1nc2ccccc2o1	2.293	-6.11215	4.15169	98.6341	0.382921	0.512173	4.92957	0.625682	2	0.41107	0.860094	0.184716	0.333394	2	4	3.55096
O=C(Nc1ccc(Cl)cc1C(Cl)Cl)c1nc2ccccc2s1	2.334	-5.39602	3.77688	99.426	-0.00975488	0.393991	3.12145	1.0304	2.5	0.154108	0.3968	0.933285	0.998302	1.5	4	-4.36718
O=C(Nc1ccc(Cl)cc1-c1ccccc1)c1nc2ccc(-c3nc4ccccc4o3)cc2o1	2.384	-6.85902	4.60737	98.6408	-0.0393768	0.627813	2.32377	0.686763	2	0.653112	0.995417	0.500254	0.194937	2	4	-0.824241
N#CC(=O)Nc1cccc2ccc3cccnc3c12	2.392	-3.76267	2.7401	97.7172	-0.270944	2.16521	2.79963	0.892941	2	0.120873	0.996905	0.725699	0.130581	2	4	-9.22418
O=C(Nc1ccc(Cl)cc1-c1cn2ccccc2n1)C(F)(F)F	2.395	-3.88367	3.14527	98.8453	-0.0777072	0.60822	4.22705	1.00582	2.5	0.246239	0.793247	0.577835	0.706016	1.5	4	-8.49559
O=c1c(O)c(-c2ccc(C(F)(F)F)cc2)oc2ccc(-c3ccc(-c4ccc(C(F)(F)F)cc4)cc3)cc12	2.399	-6.12332	3.46973	96.9974	0.663834	0.855916	5.8786	1.09276	2	0.814689	0.968995	0.10985	0.00201752	2	4	-3.964
O=CNc1ccc(Cl)cc1-c1oc2ccccc2c(=O)c1O	2.437	-4.40313	2.05007	98.9659	-0.702759	0.540916	3.81881	0.822932	2	0.0998476	0.983722	0.579504	0.451391	2	4	-5.97338
O=CNc1ccc2nc(-c3nc4ccccc4[nH]3)oc2c1	2.504	-3.71793	2.8245	97.3087	-0.257466	2.10533	3.49325	1.03714	2.5	0.102586	0.943631	0.867544	0.379874	1.5	4	-6.3263
CC(C)(C)c1ccc(-c2cc(C(=O)Nc3ccc(Cl)cc3-c3ccccn3)cc(-c3nc4ccccc4o3)c2)cc1	2.512	-8.70529	4.48597	99.406	0.199477	0.258159	3.72047	0.561749	2	0.886074	0.993893	0.271441	0.14145	2	4	-0.831844
O=c1c(O)c(-c2ncco2)oc2ccccc12	2.539	-2.24707	1.53938	95.0172	-0.438852	3.99111	5.89396	1.59223	2	0.0847142	0.821119	0.543724	0.383051	2	4	-2.56154
Oc1ccc(-c2ccc3nc(C(F)(F)F)oc3c2)cc1-c1nc2ccccc2s1	2.548	-6.53386	3.9565	98.9278	0.451415	0.528986	4.91175	0.812244	2	0.516907	0.715927	0.410235	0.133812	2	4	-7.42378
O=CNc1ccc2nc(-c3oc4ccccc4c(=O)c3O)oc2c1	2.626	-3.73892	1.75315	98.5937	-0.608766	1.16717	2.71606	1.10919	2.5	0.0512852	0.926228	0.848441	0.43865	1.5	4	-0.264421
O=CNc1cc(O)c2c(ccc3cc(-c4nc5ccccc5s4)cnc32)c1	2.628	-5.55428	3.33542	98.1478	-0.038528	1.17434	3.64023	0.577024	2	0.18251	0.996922	0.93966	0.211161	2	4	-8.1323
FC(F)(F)c1n[nH]c2c1ccc1cccnc12	2.67	-2.99354	2.66511	97.1031	0.088006	2.38056	7.13363	1.26755	2	0.197847	0.897024	0.650659	0.52715	2	4	-6.96897
O=c1ccc2ccc(O)c(-c3n[nH]c4c3ccc3cccnc34)c2o1	2.774	-4.34579	2.76806	98.2996	-0.134523	1.30329	3.12621	0.856445	2	0.12687	0.987369	0.865495	0.297636	2	4	-3.6092
N#CC=Cc1n[nH]c2c1ccc1cccnc12	2.982	-2.50821	2.35977	98.295	-0.231153	1.60418	4.96433	0.970635	2	0.202922	0.96793	0.826008	0.191506	2	4	-9.1781
O=C(Nc1ccc(C(F)(F)F)cc1)c1ccccc1	1.43	-4.7115	3.66534	98.3568	-0.00316148	1.11783	5.44928	0.872549	1.5	0.600953	0.898437	0.295563	0.579812	2	3.5	-9.07611
O=C(Nc1ccccc1C(F)(F)F)c1ccccc1O	1.719	-4.91912	3.333	98.8969	-0.525542	0.727484	5.70538	0.66459	1.5	0.265675	0.693924	0.363406	0.854442	2	3.5	-5.96712
O=C(Nc1ccc(Cl)cc1C(F)(F)F)c1ccccc1O	1.842	-5.52995	3.64365	99.156	-0.508432	0.428446	4.8566	0.671833	2	0.395064	0.825446	0.238111	0.847408	1.5	3.5	-6.34245
CC(C)(C)C(=O)Nc1ccccc1-c1ccccn1	1.876	-3.21943	2.60098	93.4772	0.136363	5.4475	6.86429	0.511106	2	0.210182	0.738887	0.507509	0.800653	1.5	3.5	-6.31574
O=C(Nc1ccc(-c2oc3ccccc3c(=O)c2O)cc1)c1ccccc1	1.887	-4.63103	2.85993	98.4591	-0.633308	0.929628	1.779	1.01403	2.5	0.437918	0.990454	0.708128	0.674728	1	3.5	-5.37885
O=C(Nc1ccccc1)c1ccc2nc(-c3ccccc3O)oc2c1	1.919	-4.72807	3.57022	98.5355	-0.496235	0.784257	2.36411	0.788801	2	0.289509	0.949082	0.546765	0.910766	1.5	3.5	-3.27523
CC(=O)Nc1cccc2ccc3cccnc3c12	1.97	-3.31313	2.36947	96.9707	-0.129699	4.68253	3.01212	0.644874	2	0.119095	0.973882	0.868394	0.666746	1.5	3.5	-8.15371
COc1cc(Cl)ccc1NC(=O)c1nc2ccccc2o1	1.979	-4.79674	3.54682	98.5861	-0.331784	0.812411	4.77269	0.634289	2	0.455117	0.960412	0.561103	0.436398	1.5	3.5	-6.52326
O=C(Nc1ccccc1C(F)(F)F)c1nc2ccccc2s1	1.984	-4.72514	3.44458	98.5147	0.236802	0.846707	5.38469	0.637382	1.5	0.253764	0.929936	0.66589	0.661257	2	3.5	-7.90333
N#Cc1ccc(NC(=O)c2nc3ccccc3o2)cc1	2	-3.93147	2.82732	95.7866	0.0449593	3.92071	2.54715	1.21299	2.5	0.680145	0.954471	0.711568	0.525793	1	3.5	-6.72123
O=C(Nc1ccc(C(F)(F)F)cc1)c1nc2ccccc2o1	2.001	-5.1081	3.87684	97.1436	0.281216	2.34002	5.82167	0.564714	1.5	0.439295	0.892142	0.388985	0.169127	2	3.5	-5.15323
O=c1c(O)c(-c2ccc(Cl)cc2-c2ccccc2)oc2ccccc12	2.033	-4.49008	3.21737	99.2435	-0.571447	0.210877	4.16806	0.732038	2	0.316303	0.917923	0.358599	0.512892	1.5	3.5	-4.67222
O=C(Nc1ccccc1-c1ccccn1)c1cccc(-c2nc3ccccc3o2)c1	2.035	-5.42352	3.80544	97.9471	-0.0648529	1.22547	2.91817	0.804571	2	0.609311	0.991061	0.654857	0.692495	1.5	3.5	-7.97532
O=CNc1ccccc1-c1nc2ccccc2s1	2.059	-4.37848	3.31551	97.9726	0.102125	1.46863	4.70568	0.49854	2	0.0888793	0.964856	0.778066	0.516293	1.5	3.5	-10.2379
N#Cc1ccccc1NC(=O)c1nc2ccccc2o1	2.061	-3.48403	2.52436	96.7269	-0.0177492	2.56792	3.36469	0.850393	2	0.396467	0.926521	0.649175	0.653497	1.5	3.5	-6.98587
O=CNc1ccccc1-c1nc2ccccc2[nH]1	2.081	-3.52611	2.58747	97.9811	-0.1996	2.56806	4.77606	0.956154	2	0.149499	0.944384	0.828805	0.48478	1.5	3.5	-10.1223
O=C(Nc1ccc(Cl)cc1C(F)(F)F)c1nc2ccccc2s1	2.092	-5.53861	3.91001	99.3029	0.0153797	0.422432	4.63402	0.72038	2	0.387485	0.964031	0.520409	0.639045	1.5	3.5	-7.28137
O=c1c(O)c(-c2ccc(-c3ccc(C(F)(F)F)cc3)cc2)oc2ccccc12	2.094	-4.89741	3.38272	97.1905	0.257739	1.2071	5.93713	0.854404	1.5	0.459841	0.906956	0.318963	0.0483135	2	3.5	-8.07616
O=C(Nc1ccc(Cl)cc1-c1oc2ccccc2c(=O)c1O)c1ccccc1	2.1	-5.75518	2.79505	99.1505	-0.713759	0.349962	2.0282	1.02914	2.5	0.578462	0.99526	0.43229	0.8532	1	3.5	-2.4954
Oc1ccc(-c2ccc(C(F)(F)F)cc2)cc1-c1nc2ccccc2s1	2.11	-6.73578	3.92131	98.4371	0.597929	0.58417	7.21246	0.579357	1.5	0.501633	0.836315	0.309916	0.0990589	2	3.5	-6.48263
Oc1ccc(-c2ccc(C(F)(F)F)cc2)cc1-c1nc2ccccc2[nH]1	2.12	-5.63845	4.01144	97.7938	0.710463	0.979892	8.90838	0.725734	1.5	0.593099	0.846892	0.448684	0.164816	2	3.5	-6.86569
Oc1cc(-c2ccc(C(F)(F)F)cc2)ccc1-c1nc2ccccc2s1	2.122	-6.72549	3.8793	98.0665	0.544486	0.76471	6.78339	0.529542	1.5	0.486695	0.884212	0.349697	0.0928284	2	3.5	-8.36456
O=C(Nc1ccc2nc(-c3nc4ccccc4[nH]3)oc2c1)c1ccccc1	2.138	-4.79101	3.47568	98.2104	-0.351149	1.14627	1.76161	1.10883	2.5	0.626254	0.983411	0.741141	0.694654	1	3.5	-6.2886
Oc1cc(-c2ccc(C(F)(F)F)cc2)ccc1-c1nc2ccccc2[nH]1	2.148	-5.54527	3.90503	97.2492	0.678594	1.46272	6.75757	0.693121	1.5	0.622344	0.857689	0.495768	0.132663	2	3.5	-5.6022
O=C(Nc1ccc2nc(-c3ccccc3)oc2c1)c1nc2ccccc2o1	2.15	-6.25672	4.14242	97.9829	0.0320773	1.34779	2.10614	0.905436	2	0.413385	0.986764	0.674614	0.316069	1.5	3.5	-7.24437
COc1ccccc1NC(=O)c1nc2ccc(-c3ccccc3O)cc2o1	2.152	-4.6018	3.32176	97.9266	-0.191743	1.66374	4.30063	0.518361	2	0.313114	0.896141	0.692398	0.453631	1.5	3.5	-3.12425
Oc1ccc(-c2ccccc2C(F)(F)F)cc1-c1nc2ccccc2s1	2.181	-6.35668	4.0783	98.6469	0.372032	0.623314	7.45853	0.524746	1.5	0.321826	0.704509	0.418072	0.256808	2	3.5	-7.73314
N#Cc1cc(Cl)ccc1NC(=O)c1nc2ccccc2o1	2.186	-4.69954	3.08686	97.8542	-0.0536424	1.74784	3.60107	0.878709	2	0.55257	0.962322	0.527226	0.664676	1.5	3.5	-5.8139
Oc1cc(-c2ccccc2C(F)(F)F)ccc1-c1nc2ccccc2s1	2.193	-6.30502	4.02027	98.3718	0.478273	0.810706	6.82939	0.486062	1.5	0.32231	0.796697	0.463416	0.232235	2	3.5	-6.70037
O=CNc1ccc(Cl)cc1-c1nc2ccccc2[nH]1	2.201	-4.27761	3.32561	98.8199	-0.515364	0.603204	4.7097	0.828137	2	0.237206	0.974997	0.746	0.505631	1.5	3.5	-11.9074
N#Cc1ccc(-c2ccc(O)c(-c3nc4ccc(-c5ccccc5)cc4o3)c2)cc1	2.206	-7.24124	4.36291	98.3333	0.500078	1.11413	4.45288	0.847542	2	0.84419	0.974949	0.60292	0.206306	1.5	3.5	0.737888
N#Cc1ccc(NC(=O)c2ccc3cc4ccccc4c(O)c3c2O)cc1	2.212	-5.1086	3.31378	98.5257	-0.245829	0.960912	1.07334	1.19488	2.5	0.669555	0.973734	0.828433	0.674295	1	3.5	-5.18333
CN(C)c1cc(Cl)ccc1NC(=O)c1nc2ccccc2o1	2.228	-4.32947	3.55462	98.6872	-0.273784	0.872347	4.87432	0.541225	2	0.388544	0.96486	0.662094	0.524167	1.5	3.5	0.331991
COc1cc(Cl)ccc1NC(=O)c1nc2ccc(-c3ccccc3O)cc2o1	2.256	-5.69234	3.52076	98.6572	-0.389134	0.817415	3.68344	0.623528	2	0.454205	0.944481	0.571077	0.492576	1.5	3.5	-3.92841
O=c1c(O)c(-c2nc3ccccc3[nH]2)oc2ccccc12	2.259	-3.83624	2.21	98.5037	-0.463549	0.972802	5.50342	0.879055	1.5	0.159905	0.740734	0.67337	0.460451	2	3.5	-7.18689
O=C(Nc1ccc(Cl)cc1-c1nc2ccccc2[nH]1)c1nc2ccccc2o1 (Compound 2)	2.278	-5.62175	4.27116	98.7544	-0.389378	0.546743	2.86755	0.682579	2	0.695351	0.990599	0.754401	0.24279	1.5	3.5	-7.67246
Oc1ccc(-c2ccc(Cl)cc2C(F)(F)F)cc1-c1nc2ccccc2o1	2.281	-6.13059	4.20093	99.0237	0.212502	0.397034	5.94177	0.703168	1.5	0.418672	0.864527	0.185517	0.357277	2	3.5	0.161553
O=c1c(O)c(-c2nc3ccc(-c4ccccc4)cc3[nH]2)oc2ccccc12	2.281	-4.32899	3.14192	98.4977	-0.221842	0.599398	4.76377	0.727496	2	0.397971	0.927758	0.726449	0.110792	1.5	3.5	-7.16819
Oc1cc(-c2ccc(Cl)cc2C(F)(F)F)ccc1-c1nc2ccccc2s1	2.293	-6.40834	3.91812	99.1142	0.413413	0.311745	5.34334	0.564138	1.5	0.47571	0.902287	0.314728	0.257965	2	3.5	-2.6592
O=CNc1ccccc1-c1oc2ccccc2c(=O)c1O	2.298	-3.44054	1.70003	98.8779	-0.600997	0.808368	4.13843	0.850834	2	0.0563932	0.96927	0.702526	0.415462	1.5	3.5	-6.75966
O=CNc1ccc2c(c1)C(=O)c1cc(-c3ccccc3)cc(O)c1C2=O	2.299	-6.69223	3.69047	97.5581	0.232575	1.77944	4.72603	0.716174	2	0.148602	0.999126	0.984423	0.437826	1.5	3.5	0.284611
O=CNc1ccc2nc(-c3ccccc3O)oc2c1	2.299	-3.91667	2.76782	98.4493	-0.396352	1.17985	3.63061	0.743864	2	0.0417663	0.929789	0.763595	0.484971	1.5	3.5	-3.69096
O=CNc1ccc(-c2cnc3c(ccc4cccc(O)c43)c2)cc1	2.316	-4.45688	3.07099	98.2577	-0.1733	1.79258	6.5209	0.519195	1.5	0.22117	0.992868	0.956822	0.0862959	2	3.5	-10.4284
Oc1cc(-c2ccc(Cl)cc2C(F)(F)F)ccc1-c1nc2ccccc2[nH]1	2.319	-5.80463	4.1741	98.9029	0.368044	0.35266	4.68007	0.675184	2	0.611713	0.877771	0.455926	0.346926	1.5	3.5	-1.56848
N#CC(=Cc1ccc2nc(-c3ccccc3O)oc2c1)c1ccccc1	2.321	-5.09735	3.82609	98.6717	-0.243006	0.900943	3.12455	0.657301	2	0.0728271	0.897102	0.620824	0.948927	1.5	3.5	-5.06031
O=c1ccc2ccc(O)c(-c3nc4ccccc4s3)c2o1	2.331	-4.98339	3.31384	97.9473	-0.193327	1.34433	3.35502	0.581394	2	0.0792295	0.934778	0.704414	0.443211	1.5	3.5	-0.28575
CN(C)c1ccc(NC(=O)c2nc3ccc(-c4nc5ccccc5o4)cc3o2)cc1	2.345	-5.10408	3.87429	98.2453	0.191188	1.45878	3.75691	0.573192	2	0.253436	0.98728	0.800125	0.471492	1.5	3.5	3.05421
N#Cc1cc(Cl)ccc1NC(=O)c1ccc2cc3ccccc3c(O)c2c1O	2.362	-6.18367	3.19937	99.0802	-0.344404	0.465903	1.04358	1.1659	2.5	0.516899	0.973037	0.61232	0.907193	1	3.5	-4.37721
Nc1ccc(-c2ccc(O)c(-c3nc4ccc(-c5ccc(C(F)(F)F)cc5)cc4o3)c2)cc1	2.365	-6.54818	3.50148	97.6631	0.816068	1.32094	6.00608	0.780691	1.5	0.63545	0.964251	0.658034	0.0402484	2	3.5	5.86389
O=CNc1ccc(Cl)cc1-c1ccc2c(c1)C(=O)c1cccc(O)c1C2=O	2.406	-6.16471	3.3896	98.5886	-0.0665966	0.584693	3.00951	0.72578	2	0.224172	0.998661	0.959006	0.444224	1.5	3.5	-1.5984
O=C(Nc1cc(O)c2c(ccc3cc(C(F)(F)F)cnc32)c1)c1ccccc1O	2.407	-6.09053	3.15148	98.8019	-0.360188	0.660145	4.58502	0.685415	2	0.5516	0.978819	0.596847	0.508979	1.5	3.5	-7.75197
Oc1ccc(-c2ccc(Cl)cc2N(c2ccccc2)c2ccccc2)cc1-c1nc2ccccc2s1	2.414	-8.17756	4.17827	99.2857	0.287778	0.168325	3.16052	0.593427	2	0.451075	0.980509	0.115652	0.988515	1.5	3.5	-2.94702
Oc1ccc(-c2ccc(C(F)(F)F)cc2)cc1-c1nc2ccc(-c3ccc(C(F)(F)F)cc3)cc2o1	2.446	-8.45146	4.90125	97.5085	1.01057	0.791907	6.73419	0.819962	1.5	0.820977	0.937404	0.0739586	0.0115489	2	3.5	4.46971
Nc1cc(Cl)ccc1-c1ccc(O)c(-c2nc3ccc(-c4ccc(C(F)(F)F)cc4)cc3o2)c1	2.484	-7.271	3.91952	98.1318	0.761782	0.957507	5.79872	0.895342	1.5	0.680584	0.984275	0.395753	0.178089	2	3.5	7.42239
Oc1ccc(-c2ccc(Cl)cc2C(F)(F)F)cc1-c1nc2ccc(-c3ccc(C(F)(F)F)cc3)cc2o1	2.582	-8.4665	4.80663	98.648	0.918696	0.267917	6.07589	0.821589	1.5	0.8038	0.939871	0.06402	0.0404694	2	3.5	7.69213
N#Cc1nc2ccc(NC(=O)c3nc4ccccc4o3)cc2o1	2.593	-4.22888	2.85918	96.7103	-0.0209862	2.7114	2.52932	0.995039	2	0.367306	0.990859	0.678294	0.489919	1.5	3.5	-5.75085
CC(=O)Nc1cccc2c1-c1nc3cccc4c3c(c1C2)CC4	2.611	-4.8469	3.24478	95.8427	0.724482	3.80518	3.5259	0.549814	2	0.235627	0.598286	0.920427	0.915645	1.5	3.5	-4.84272
O=c1c(O)c(-c2n[nH]c3c2ccc2cccnc23)oc2ccccc12	2.661	-4.19545	2.40161	98.3809	-0.249075	0.749901	4.97829	0.750901	2	0.166722	0.984414	0.824233	0.307092	1.5	3.5	-4.8415
N#CC(=Cc1ccccc1-c1nc2ccccc2s1)c1ccc2cc3ccccc3c(O)c2c1O	2.743	-6.23554	3.98715	99.0449	0.0980738	0.442923	0.823532	0.998055	2	0.153075	0.981297	0.844389	0.686599	1.5	3.5	-3.2062
O=Cc1n[nH]c2c1ccc1cccnc12	2.764	-2.40351	2.12934	96.867	0.00628663	3.96016	7.5355	1.33771	2	0.122451	0.947533	0.803663	0.606391	1.5	3.5	-10.1416
Oc1ccc(-c2ccc(Cl)cc2-c2cc3c4c(c2)CCCN4CCC3)cc1-c1nc2ccc(-c3ccc(C(F)(F)F)cc3)cc2o1	2.933	-9.67783	4.37875	98.9788	0.931275	0.348028	4.2175	0.572616	2	0.978475	0.996673	0.449067	0.00927861	1.5	3.5	11.6126
N#CC(=Cc1ccc2nc(-c3ccccc3)oc2c1)c1ccc(-c2cnc3c(ccc4cc(NC=O)cc(O)c43)c2)cc1	2.993	-6.37007	4.2855	98.6414	0.11814	0.800887	1.59389	0.971438	2	0.442648	0.99988	0.967123	0.176795	1.5	3.5	-7.68971
O=C(Nc1ccccc1-c1ccccc1)c1ccccc1O	1.534	-3.40148	3.06805	98.8211	-0.583843	0.423844	3.99539	0.562047	2	0.400604	0.895555	0.49602	0.875424	1	3	-9.85968
O=C(Nc1ccccc1-c1ccccn1)c1ccccc1	1.565	-3.65529	2.69121	97.5158	-0.146187	2.28299	3.35329	0.85492	2	0.624302	0.959779	0.622991	0.876481	1	3	-8.98097
N#Cc1ccc(NC(=O)c2ccccc2O)cc1	1.629	-3.56284	2.92722	97.8391	-0.391834	1.64872	4.36082	0.839863	2	0.601746	0.893193	0.631932	0.865197	1	3	-6.21155
O=C(Nc1ccc(Cl)cc1-c1ccccc1)c1ccccc1O (Compound 4)	1.675	-5.32404	3.48059	99.4144	-0.713426	0.196226	3.78893	0.565945	2	0.564348	0.951806	0.396558	0.805797	1	3	-7.44924
N#Cc1ccccc1NC(=O)c1ccccc1O	1.698	-3.71723	2.65228	98.5019	-0.530796	1.1774	3.7023	0.831783	2	0.303667	0.813066	0.466647	0.977494	1	3	-6.75381
O=C(Nc1ccccc1-c1nc2ccccc2s1)c1ccccc1	1.717	-5.63908	3.74515	97.9827	0.135815	1.13003	2.82168	0.59421	2	0.557265	0.989535	0.645169	0.859807	1	3	-6.42957
O=C(Nc1ccccc1-c1nc2ccccc2[nH]1)c1ccccc1	1.733	-4.5699	3.14082	97.6589	-0.0182097	1.93805	2.52594	0.834009	2	0.679257	0.98082	0.695687	0.801729	1	3	-7.20815
CC(C)(C)c1ccc(O)c(C(=O)Nc2ccc(Cl)cc2)c1 (Compound 3)	1.752	-6.08392	3.94409	98.8471	-0.277668	0.716842	5.97727	0.420433	1.5	0.493057	0.860644	0.205317	0.87813	1.5	3	-4.2691
O=C(Nc1ccccc1-c1ccccn1)c1ccccc1O	1.752	-3.77899	2.92468	99.1517	-0.732856	0.442975	3.39569	0.617952	2	0.383678	0.904142	0.659774	0.901915	1	3	-8.38216
O=C(Nc1ccc(Cl)cc1-c1nc2ccccc2o1)c1ccccc1	1.847	-5.62292	3.99446	98.5841	-0.319971	0.675095	1.75968	0.954133	2	0.61928	0.989929	0.359317	0.828963	1	3	-6.05333
N#Cc1cc(Cl)ccc1NC(=O)c1ccccc1O	1.847	-5.27739	3.184	98.8446	-0.468829	0.634689	3.86016	0.821858	2	0.443576	0.896727	0.340541	0.978084	1	3	-5.99596
O=C(Nc1ccc([N+](=O)[O-])cc1)c1nc2ccccc2s1	1.892	-4.60005	3.08137	97.5616	-0.079761	2.54497	3.29027	0.644712	2	0.287204	0.999122	0.973017	0.97401	1	3	-7.71884
O=C(Nc1ccc2nc(-c3ccccc3O)oc2c1)c1ccccc1	1.913	-4.93622	3.62271	98.5342	-0.439466	0.779897	1.64725	0.965713	2	0.397924	0.980349	0.599687	0.758766	1	3	-5.42295
O=C(Nc1ccc(C(F)(F)F)cc1)c1nc2ccccc2s1	1.919	-5.49699	3.96274	98.5214	0.246977	0.799337	6.04903	0.482652	1.5	0.345466	0.961967	0.533538	0.468845	1.5	3	-10.4112
O=C(Nc1ccc(Cl)cc1-c1ccccc1)c1nc2ccccc2s1	1.924	-5.5249	3.94284	99.065	-0.185568	0.382049	3.39542	0.594885	2	0.514366	0.990448	0.730464	0.526611	1	3	-8.83296
CNC(=O)c1nc2ccccc2s1	1.963	-2.21755	1.50499	95.416	0.116025	4.44279	5.95902	0.638156	1.5	0.0851585	0.880079	0.771099	0.557858	1.5	3	-7.37707
O=C(Nc1ccccc1-c1oc2ccccc2c(=O)c1O)c1ccccc1	1.971	-3.8456	2.44355	98.4748	-0.463602	0.675162	2.2602	0.982097	2	0.416293	0.990381	0.543279	0.867657	1	3	-4.43346
CN(C)c1ccc(NC(=O)c2nc3ccccc3o2)cc1	1.978	-3.96931	3.28205	97.5955	0.0496586	2.08874	5.32575	0.447835	1.5	0.234005	0.93678	0.836119	0.465461	1.5	3	-3.08789
CN(C)c1ccccc1NC(=O)c1nc2ccccc2[nH]1	2.034	-3.70306	3.1584	97.2192	-0.239376	2.53306	5.90736	0.597777	1.5	0.132541	0.758954	0.847959	0.635509	1.5	3	-3.90664
Nc1ccc(-c2ccc(O)c(-c3nc4ccccc4o3)c2)cc1	2.039	-4.68254	3.30855	97.645	0.164877	2.48871	5.37027	0.811275	1.5	0.236225	0.915044	0.864665	0.355565	1.5	3	-2.25453
O=C(Nc1ccc(Cl)cc1[N+](=O)[O-])c1nc2ccccc2s1	2.041	-4.86934	3.20503	99.3324	-0.339092	0.376647	3.23549	0.681676	2	0.265211	0.998283	0.892488	0.963487	1	3	-3.43818
O=c1c(O)c(-c2ccccc2)oc2ccc(-c3ccc(-c4ccc(-c5ccccc5)cc4)cc3)cc12	2.046	-7.83985	4.17056	97.472	0.140764	0.595853	3.74171	0.779867	2	0.824637	0.997318	0.753785	0.00625912	1	3	-5.32827
Oc1ccc(-c2ccc(-c3ccc(-c4ccccc4)cc3)cc2)cc1-c1nc2ccccc2s1	2.079	-9.81366	5.6327	98.3577	0.644383	0.603499	4.33247	0.558855	2	0.882763	0.991657	0.818966	0.00822969	1	3	-3.63208
O=C(Nc1ccc(Cl)cc1C(F)(F)F)c1nc2ccccc2[nH]1	2.121	-5.11685	3.85514	98.9627	-0.117513	0.547194	5.11996	0.824313	1.5	0.341512	0.778751	0.454722	0.33921	1.5	3	-7.89045
CN(C)c1ccc(-c2ccc(-c3nc4ccccc4[nH]3)c(O)c2)cc1	2.124	-3.8618	3.18599	98.3772	0.147906	1.04535	6.0653	0.502825	1.5	0.426967	0.918957	0.896048	0.294975	1.5	3	2.98813
O=C(Nc1ccccc1-c1ccccc1)c1ccc2cc3ccccc3c(O)c2c1O	2.141	-4.16369	3.43254	98.3541	-0.109762	0.42349	1.12076	0.901972	2	0.467719	0.9744	0.743159	0.645971	1	3	-3.66875
O=C(Nc1ccc(Cl)cc1-c1nc2ccccc2[nH]1)c1nc2ccccc2s1	2.216	-5.90267	4.40141	99.0488	-0.236833	0.406286	2.62896	0.680777	2	0.605058	0.996301	0.850965	0.627955	1	3	-12.3569
O=C(Nc1cccc2ccc3cccnc3c12)C(F)(F)F	2.22	-3.99035	3.15628	97.1109	0.116706	2.61642	4.33873	0.840155	2	0.146716	0.910301	0.833047	0.816944	1	3	-9.92887
O=CNc1cccc2ccc3cccnc3c12	2.238	-3.06712	2.36483	98.9414	-0.222308	2.5176	5.84752	0.89535	1.5	0.126843	0.984781	0.910321	0.597394	1.5	3	-10.0888
Oc1ccc(-c2ccc(N(c3ccccc3)c3ccccc3)cc2)cc1-c1nc2ccccc2s1	2.252	-8.80616	5.09732	99.1853	0.70587	0.312753	3.46752	0.546759	2	0.403189	0.949299	0.411591	0.867135	1	3	5.23575
N#Cc1cc(Cl)ccc1-c1ccc(O)c(-c2nc3ccccc3o2)c1	2.265	-5.83785	3.45294	98.76	-0.082381	0.859204	4.83038	0.815895	2	0.582066	0.928743	0.399549	0.797047	1	3	-1.4201
Oc1ccc(-c2n[nH]c3c2ccc2cccnc23)cc1	2.28	-3.6909	3.46936	96.9934	0.256069	2.97403	9.59236	0.798571	1.5	0.269989	0.862991	0.786958	0.472227	1.5	3	-9.35089
Oc1ccc(-c2ccc(Cl)cc2C(F)(F)F)cc1-c1nc2ccccc2[nH]1	2.292	-5.87427	4.28843	98.9978	0.372968	0.320111	7.25595	0.667374	1.5	0.570264	0.862112	0.417727	0.379312	1.5	3	-3.42986
Oc1cccc(-c2n[nH]c3c2ccc2cccnc23)c1	2.347	-3.61526	3.40011	96.6781	0.17014	3.55649	8.31548	0.644358	1.5	0.255344	0.838888	0.796439	0.486333	1.5	3	-9.46379
N#Cc1cc(Cl)ccc1-c1ccc(O)c(-c2nc3ccc(-c4ccccc4)cc3o2)c1	2.351	-7.16035	3.89523	98.7575	0.162698	0.685905	4.57406	0.793284	2	0.790911	0.970096	0.435951	0.614439	1	3	1.14922
O=c1c(O)c(-c2ccc(-c3ccc(-c4ccccc4)cc3)cc2)oc2ccc(-c3nc4ccccc4[nH]3)cc12	2.384	-6.90608	3.50065	97.9415	0.109161	0.562799	2.80879	0.898285	2	0.79052	0.99727	0.894139	0.0232237	1	3	-4.04196
O=CNc1ccccc1-c1cnc2c(ccc3cccc(O)c32)c1	2.388	-3.84454	2.97478	98.5982	-0.238643	1.02102	6.42275	0.470844	1.5	0.188758	0.98575	0.915165	0.338032	1.5	3	-10.1779
N#Cc1cc(Cl)ccc1NC(=O)c1nc2ccc(-c3ccccc3O)cc2o1	2.411	-6.25481	3.27434	98.1467	-0.117098	1.46903	2.94588	0.805794	2	0.551336	0.947144	0.536776	0.711058	1	3	-4.96157
O=c1c(O)c(-c2cc3c4c(c2)CCCN4CCC3)oc2ccccc12	2.443	-4.50548	3.0923	98.2307	-0.189226	1.68522	5.12703	0.336685	1.5	0.271246	0.837649	0.73505	0.575138	1.5	3	-0.0106881
O=CNc1cc(O)c2c(ccc3cccnc32)c1	2.446	-3.41019	2.32439	97.6092	-0.215966	2.71125	5.42121	0.700549	1.5	0.104327	0.980994	0.937166	0.6494	1.5	3	-7.02079
O=CNc1ccc(Cl)cc1-c1cnc2c(ccc3cccc(O)c32)c1	2.498	-5.47234	3.18445	98.9481	-0.465015	0.462637	5.96053	0.451814	1.5	0.314205	0.99372	0.867951	0.293084	1.5	3	-10.2465
Oc1ccc(-c2ccc(-c3cc4c5c(c3)CCCN5CCC4)cc2)cc1-c1nc2ccccc2o1	2.498	-7.62498	4.27201	98.1645	0.519249	1.54961	4.33134	0.408741	2	0.801313	0.984522	0.770032	0.138018	1	3	5.06322
N#CC(=Cc1ccc2c(c1)C(=O)c1cc(-c3ccccc3O)cc(O)c1C2=O)c1ccccc1	2.555	-7.6907	4.20058	98.4189	0.0098796	0.928775	3.32795	0.71157	2	0.109636	0.992908	0.954875	0.975165	1	3	2.47173
O=C(Nc1cc(O)c2c(ccc3cc(C(F)(F)F)cnc32)c1)c1nc2ccccc2s1	2.582	-6.38642	3.7092	98.4191	0.396578	0.98535	3.45349	0.752003	2	0.540565	0.996738	0.784329	0.429155	1	3	-7.99202
N#CC(C#N)=Cc1cc(Cl)ccc1NC(=O)c1nc2ccccc2s1	2.611	-5.40962	3.41953	99.1989	-0.335901	0.477818	2.97513	0.767104	2	0.225654	0.998652	0.891646	0.824984	1	3	-10.3643
Oc1ccc(-c2ccc(Cl)cc2-c2cc3c4c(c2)CCCN4CCC3)cc1-c1nc2ccccc2[nH]1	2.632	-7.36112	3.70837	98.7663	0.319461	0.55824	4.90252	0.370991	2	0.937448	0.992015	0.898195	0.117973	1	3	1.51697
O=CNc1cccc2c1-c1nc3cccc4c3c(c1C2)CC4	2.834	-5.18469	3.19715	97.0585	0.511009	2.63359	5.43673	0.642068	1.5	0.255961	0.666557	0.945684	0.816247	1.5	3	-7.78962
CC1=NC(=C(c2nc3ccccc3s2)c2cc(Cl)ccc2NC=O)C(=O)N1C (Compound 1)	3.098	-4.92481	3.00565	98.066	-0.200147	1.25643	4.44315	0.611763	2	0.184435	0.994491	0.871579	0.755886	1	3	-0.571183
O=CNc1ccc2nc([C@@H](c3ccccc3)c3ccc4cccc(O)c4c3O)oc2c1	3.172	-4.56523	3.40504	97.3367	0.243004	3.00936	1.36684	0.93321	2	0.176839	0.990958	0.700904	0.775655	1	3	-3.56755
O=C(Nc1ccc(Cl)cc1-c1ccccn1)c1ccccc1	1.696	-4.95808	3.36216	98.7297	-0.570563	0.507838	2.79438	0.82785	2	0.776033	0.982235	0.536986	0.756666	0.5	2.5	-10.2319
O=C(Nc1ccc(Cl)cc1)c1nc2ccccc2s1	1.729	-4.84806	3.42271	99.0912	-0.445419	0.488954	3.78151	0.650423	2	0.375053	0.979332	0.721529	0.893419	0.5	2.5	-7.65282
COc1ccc(NC(=O)c2nc3ccccc3o2)cc1	1.804	-4.12867	3.3372	96.3956	-0.113804	2.90552	5.21236	0.509952	1.5	0.396824	0.954025	0.765362	0.328851	1	2.5	-1.50248
O=C(Nc1cccc2ccc3cccnc3c12)c1ccccc1	1.834	-4.78849	3.41788	98.2739	-0.185861	1.34758	3.29342	0.72053	2	0.616345	0.996759	0.856992	0.879159	0.5	2.5	-12.0027
O=C(Nc1ccc(Cl)cc1-c1nc2ccccc2[nH]1)c1ccccc1	1.847	-5.54924	4.00167	98.8402	-0.368638	0.464142	2.56243	0.800009	2	0.80857	0.991053	0.599101	0.749004	0.5	2.5	-7.74384
COc1cc(Cl)ccc1NC(=O)c1nc2ccccc2s1	1.894	-5.02949	3.58965	98.9283	-0.0817393	0.71226	4.33928	0.601165	2	0.344906	0.980334	0.724194	0.7962	0.5	2.5	-8.31797
N#Cc1ccc(NC(=O)c2nc3ccccc3s2)cc1	1.912	-4.42007	2.97278	97.9518	0.235136	2.05488	2.91512	0.972097	2	0.587209	0.985013	0.816823	0.830045	0.5	2.5	-9.87813
O=C(Nc1ccccc1-c1cn2ccccc2n1)c1ccccc1	1.915	-3.66856	2.77315	97.9724	-0.0799717	1.79232	3.03339	0.967282	2	0.66589	0.982373	0.705792	0.82217	0.5	2.5	-9.21797
CC(C)(C)C(=O)Nc1ccc(Cl)cc1-c1ccccn1	2.01	-4.04746	3.26674	96.7637	0.0326545	2.3081	6.82341	0.423034	1.5	0.354533	0.870906	0.415938	0.707953	1	2.5	-6.52731
O=C(Nc1ccc(Cl)cc1-c1cn2ccccc2n1)c1ccccc1	2.027	-5.10624	3.57912	99.0279	-0.510095	0.48305	2.88038	0.897731	2	0.789275	0.991699	0.613419	0.778636	0.5	2.5	-8.31365
CC(C)(C)c1ccc(C(=O)Nc2cccc3ccc4cccnc4c23)cc1	2.044	-6.10257	4.23745	98.8026	0.0550327	0.742786	5.04244	0.508586	1.5	0.691093	0.994658	0.72356	0.689808	1	2.5	-12.3927
N#Cc1cc(Cl)ccc1NC(=O)c1nc2ccccc2s1	2.101	-4.89581	3.15314	98.9606	0.152177	0.864224	3.3387	0.790211	2	0.433883	0.980801	0.702938	0.909152	0.5	2.5	-5.75088
O=C(Nc1cc(O)c2c(ccc3cc(-c4ccccc4)cnc32)c1)c1ccccc1	2.114	-4.7652	3.76821	98.3602	-0.120154	0.721774	2.82884	0.690151	2	0.883148	0.99733	0.849953	0.541632	0.5	2.5	-7.1297
Cc1cc(C(=O)Nc2cccc3ccc4cccnc4c23)cc(C)c1C	2.126	-5.797	3.83734	97.3481	0.0390006	2.69518	4.60694	0.520039	2	0.555618	0.99524	0.881714	0.827744	0.5	2.5	-11.9885
O=C(Nc1ccc2c(c1)C(=O)c1cc(-c3ccccc3O)cc(O)c1C2=O)c1ccccc1	2.237	-8.38506	4.26834	97.6989	-0.227987	1.39113	1.82828	0.931148	2	0.493288	0.998722	0.951724	0.771734	0.5	2.5	3.13676
O=C(Nc1ccc(Cl)cc1[N+](=O)[O-])c1ccc2cc3ccccc3c(O)c2c1O	2.324	-5.76305	3.39205	99.5632	-0.593696	0.207186	1.06099	0.95203	2	0.334742	0.997188	0.86484	0.959871	0.5	2.5	-1.50924
O=C(Nc1ccc2c(c1)C(=O)c1cc(-c3nc4ccccc4[nH]3)cc(O)c1C2=O)c1ccccc1	2.351	-8.49047	4.21134	97.9384	0.0755345	1.2685	1.43118	0.938575	2	0.679379	0.999809	0.97859	0.840724	0.5	2.5	1.39765
O=C(Nc1cc(O)c2c(ccc3cccnc32)c1)C(F)(F)F	2.375	-3.60586	2.68328	96.9928	0.273913	2.1526	5.17355	0.727761	1.5	0.133638	0.842419	0.838397	0.913517	1	2.5	-8.20647
N#CC(=Cc1nc2ccccc2s1)NC(=O)c1ccc(Cl)cc1	2.493	-5.40812	3.65994	99.1971	-0.0390018	0.56073	1.69558	0.970206	2	0.674897	0.998064	0.743164	0.977787	0.5	2.5	-8.12466
O=C(Nc1cc(O)c2c(ccc3cc(-c4cn5ccccc5n4)cnc32)c1)c1ccccc1	2.503	-4.57227	3.54217	97.9772	-0.0900944	1.53135	2.15042	0.912685	2	0.850806	0.998803	0.920535	0.525882	0.5	2.5	-6.26615
O=C(Nc1cc(O)c2c(ccc3cc(-c4oc5ccccc5c(=O)c4O)cnc32)c1)c1ccccc1	2.571	-4.66388	3.09324	98.3683	-0.37754	0.692523	1.74416	0.986794	2	0.700555	0.99877	0.856287	0.646302	0.5	2.5	-4.74871
Oc1ccc(-c2ccc(-c3cc4c5c(c3)CCCN5CCC4)cc2)cc1-c1ncco1	2.584	-6.61623	3.68657	97.5463	0.275346	2.50004	5.91346	0.484196	1.5	0.811327	0.978338	0.825493	0.0650592	1	2.5	1.53702
N#Cc1cc(Cl)ccc1NC(=O)c1nc2ccc(-c3ccc(-c4cccc5c4-c4nc6cccc7c6c(c4C5)CC7)cc3)cc2o1	3.136	-10.9029	5.01134	98.5706	0.637997	0.720789	2.30259	0.801421	2	0.980864	0.995096	0.955547	0.594524	0.5	2.5	-0.14014
