# Supplementary material for: Unveiling key descriptors via machine learning: toward rational molecular design of chromophores with excited-state intramolecular proton transfer
Source: Chem Sci. 2026 Feb 9;17(14):7146–56. doi: 10.1039/d5sc07051a (PMC12910287; doi:10.1039/d5sc07051a)
Supplement: SC-017-D5SC07051A-s005 [file SC-017-D5SC07051A-s005.xlsx]

## Sheet: Sheet1
Unveiling Key Descriptors via Machine Learning: Toward Rational Molecular Design of Chromophores with Excited-State Intramolecular Proton Transfer Shengsheng Wei,1 Zipeng Yang,1 Chao Yang,1 Hongmei Zhao,1 Yang Li,1 Yuanyuan Guo,1 Andong Xia,1* Zhuoran Kuang,1* 1. State Key Laboratory of Information Photonic and Optical Communications, and School of Science, Beijing University of Posts and Telecom…
safety was evaluated based on four commonly assessed parameters: AMES toxicity, skin sensitization, hERG inhibition, and the potential for drug-induced liver injury (DILI). safety score was assigned according to these parameters, with values of +1 for “Excellent,” +0.5 for “Medium,” and +0 for “Poor.” Pharmacokinetic evaluation involved five parameters: VDss, Fu, CL, T1/2, and PPB, using the same…
smiles	SA scores	logS	logD	PPB	logVDss	Fu	cl-plasma	t0.5	Pharmacokinetics score	hERG	DILI	Ames	SkinSen	Safety score	Total score(Pharmacokinetics score+Safety score)	pre_ΔE*
CN(C)C(=O)c1ccc(-c2ccc3ccoc3c2)cc1O	2.227	-3.18225	2.63468	75.0178	-0.213712	23.8907	10.1604	1.13159	4	0.377417	0.973235	0.642395	0.0746586	2	6	-4.64041
NC(=O)c1n[nH]c2c1ccc1cccnc12	2.517	-2.61795	1.25574	86.9574	0.131918	10.9609	4.42433	1.38965	4	0.231845	0.958027	0.868315	0.173557	2	6	-8.3574
CC1=N[C@H](S(=O)(=O)Nc2ccccc2O)C(=O)N1C	3.434	-2.08088	0.603519	57.9571	-0.3166	42.2017	2.42877	1.73582	4.5	0.0812684	0.843707	0.352127	0.999006	1.5	6	-1.5678
NC(=O)c1ccc(C(=O)c2cc3ccc(O)cc3o2)c(O)c1	2.256	-3.41048	2.06898	87.7208	-0.0791034	12.9672	5.61939	1.43648	3.5	0.204544	0.961628	0.71676	0.154223	2	5.5	-3.05967
O=C(c1ccc(C(F)(F)F)cc1)c1ccccc1O	1.725	-4.86971	3.80979	98.3755	-0.333441	0.949927	7.44495	0.866709	1.5	0.186255	0.379315	0.231465	0.272484	3.5	5	-5.28524
O=c1c(O)c(-c2ccc(C(F)(F)F)cc2)oc2ccccc12	2.059	-4.07109	3.06709	97.7246	-0.0820541	1.27914	6.75589	1.07971	2	0.1968	0.720024	0.227529	0.195747	3	5	-7.03341
O=c1c(O)c(-c2ccccc2)oc2ccc(C(F)(F)F)cc12	2.1	-4.01751	2.98545	98.3369	0.00143015	0.744982	6.9042	1.23211	2	0.161988	0.816567	0.195679	0.194503	3	5	-8.84557
NCc1ccc(-c2nc3ccccc3[nH]2)c(O)c1	2.129	-2.71437	2.26711	72.7836	0.265179	30.0751	6.67495	0.792481	3.5	0.340507	0.319098	0.663738	0.952176	1.5	5	-5.53814
CN(C)C(=O)Nc1ccc2c(c1)C(=O)c1cccc(O)c1C2=O	2.176	-5.00005	2.9556	81.1032	0.289667	21.153	4.91925	0.769808	4	0.095745	0.97077	0.941834	0.703031	1	5	4.90841
O=c1c(O)c(-c2ccc(C(F)(F)F)cc2)oc2ccc(-c3ccccc3O)cc12	2.303	-4.65492	3.25847	98.3569	-0.119072	0.752866	5.25273	0.975414	1.5	0.179877	0.690608	0.220599	0.148446	3.5	5	-3.14939
O=C(c1ccccc1)c1cc2cc(-c3ccc4ccoc4c3)oc2cc1O	2.374	-6.00749	3.7741	98.1791	-0.206362	1.10506	4.57121	1.22978	2.5	0.249334	0.981212	0.595006	0.108701	2.5	5	-2.35283
COc1ccc(C(C)(C)C)cc1C=CC(=O)c1ccc2cccc(O)c2c1O	2.444	-6.0864	4.07901	98.4438	0.038209	1.05106	2.71027	1.11442	2.5	0.241407	0.491701	0.527041	0.650445	2.5	5	-2.42071
O=c1c(O)c(-c2ccc(-c3ccc(-c4nc5cc(C(F)(F)F)ccc5o4)cc3)cc2)oc2ccccc12	2.458	-6.44038	3.89823	96.8671	0.499705	1.64344	2.32068	1.20432	2.5	0.480783	0.987907	0.268287	0.0233317	2.5	5	-0.0655534
CN(c1nc2ccccc2o1)c1cc2cc(-c3ccccc3)oc2cc1O	2.568	-5.66868	4.08733	98.3536	0.0639183	1.00037	1.60661	1.13011	2.5	0.236966	0.987018	0.605137	0.21446	2.5	5	-0.000317285
CNc1ccc(C#N)cc1-c1nc2ccc(-c3cc(C(F)(F)F)ccc3O)cc2o1	2.601	-5.61313	3.70402	97.996	0.459303	1.41739	2.78804	1.5439	2.5	0.610257	0.794723	0.211961	0.226431	2.5	5	0.833214
Cc1cc(-c2ccc(-c3oc4ccc(-c5nc6cc(C(C)(C)C)ccc6o5)cc4c(=O)c3O)cc2)cc(C)c1C	2.718	-6.41026	3.6453	98.7917	0.285017	0.671732	3.27151	1.22955	2.5	0.432582	0.993142	0.291236	0.0966962	2.5	5	2.12477
Cc1cc(-c2ccc(-c3oc4ccc(-c5nc6cc(C(F)(F)F)ccc6o5)cc4c(=O)c3O)cc2)cc(C)c1C	2.724	-6.50436	3.77506	98.7036	0.487947	0.586432	3.47815	1.31201	2.5	0.464012	0.991582	0.240649	0.035958	2.5	5	1.21293
O=CNc1n[nH]c2c1ccc1cccnc12	2.769	-2.42152	1.65267	92.3702	0.0272532	7.11347	2.98649	1.18623	3	0.102356	0.953264	0.837875	0.172427	2	5	-9.59925
COc1ccc(-c2nc3ccccc3o2)cc1-c1nc2sc(-c3cc(C(C)(C)C)ccc3O)nc2s1	2.832	-8.10046	3.85639	98.2418	0.409183	1.38921	3.1091	1.15441	2.5	0.161604	0.994745	0.270107	0.647303	2.5	5	-0.260948
CNc1nc2ccc(-c3cc4cc(-c5nc6cc(C(F)(F)F)ccc6o5)c(O)cc4o3)cc2s1	2.837	-6.43032	4.15364	99.1874	0.533237	0.390972	2.92	0.994494	2	0.289774	0.995559	0.272	0.154111	3	5	-3.15972
CC1=NC(=Cc2ccccc2NC=O)C(=O)N1C	2.861	-2.68354	1.14579	70.6542	0.190782	29.1107	7.65068	1.61364	4	0.0877935	0.965064	0.945329	0.981696	1	5	-4.07682
CCN(CC)c1ccc2cc(-c3oc4cc(-c5nc6cc(C(F)(F)F)ccc6o5)ccc4c(=O)c3O)oc2c1	2.96	-5.71801	3.74163	98.3399	0.3821	0.913093	3.22283	1.15499	2.5	0.159324	0.939388	0.346593	0.240251	2.5	5	8.22974
CCN(CC)c1ccc2cc(-c3ccc4oc(-c5nc6cc(C(F)(F)F)ccc6o5)c(O)c(=O)c4c3)oc2c1	2.98	-5.12604	3.53033	98.4067	0.357317	0.88941	3.39979	1.14844	2.5	0.124794	0.876734	0.375195	0.214463	2.5	5	6.43886
Cc1cc(C(=O)Nc2ccccc2O)cc(C)c1C	1.743	-4.67836	3.31141	89.065	-0.0437025	10.8402	7.33971	0.719006	3	0.182877	0.715527	0.529552	0.89477	1.5	4.5	-3.21382
NC(=O)Nc1cccc2c1C(=O)c1ccccc1C2=O	1.938	-4.34499	2.62998	93.2232	0.345457	5.13051	0.521166	1.73466	3	0.186731	0.990622	0.886456	0.525652	1.5	4.5	-4.60629
COc1ccc(-c2ccc3nc(-c4ccccc4O)oc3c2)cc1	1.965	-5.43347	3.84912	98.2902	-0.0298313	1.03938	4.85546	0.549148	2	0.283456	0.895155	0.614252	0.207409	2.5	4.5	0.461087
N#Cc1ccc(-c2ccc(-c3oc4ccccc4c(=O)c3O)cc2)cc1	2.072	-4.85614	2.78437	97.9963	0.0432302	1.13169	3.90337	1.06253	2.5	0.67742	0.960638	0.69535	0.177192	2	4.5	-5.85161
Cc1oc2ccccc2c(=O)c1O	2.116	-2.16289	1.4625	95.1845	-0.514142	4.45254	6.80769	1.21161	2	0.0906218	0.599454	0.619473	0.544092	2.5	4.5	-5.45835
O=c1c(O)c(-c2ccc(C(F)(F)F)cc2)oc2ccc(-c3ccccc3)cc12	2.132	-4.64935	3.38572	97.9235	0.27907	0.654424	6.59791	1.03701	2	0.354393	0.865466	0.231707	0.0860036	2.5	4.5	-6.19713
CCN(CC)C(=O)c1ccccc1NC(=O)c1nc2ccc(O)cc2[nH]1	2.243	-3.50681	2.61977	93.2915	0.10102	5.65389	5.71573	0.587531	2	0.294528	0.903745	0.631725	0.182358	2.5	4.5	-8.3266
O=C1c2cc(-c3ccc(-c4nc5ccccc5o4)cc3)ccc2C(=O)c2c(O)cccc21	2.246	-8.4559	4.36019	97.906	0.619523	1.27257	1.46201	1.04878	2.5	0.296858	0.996498	0.934309	0.228003	2	4.5	1.08973
O=C(Nc1ccccc1-c1cn2ccccc2n1)C(F)(F)F	2.286	-3.6666	2.48174	96.8383	0.233822	2.37747	4.04912	1.1764	2.5	0.153676	0.644402	0.679292	0.706161	2	4.5	-10.3063
O=c1c(O)c(-c2ccccc2O)oc2ccc(-c3ccc(C(F)(F)F)cc3)cc12	2.309	-4.93304	3.24343	98.5375	-0.120702	0.598266	7.52987	0.93573	1.5	0.237636	0.86287	0.242911	0.0908768	3	4.5	-2.82239
O=C(Nc1ccccc1-c1ccccn1)c1cc(-c2nc3ccccc3o2)cc(C(F)(F)F)c1	2.315	-6.55495	4.24989	98.1299	0.290203	1.25968	2.12653	1.08278	2.5	0.57173	0.963282	0.313461	0.260742	2	4.5	-7.96631
O=c1c(O)c(-c2ccc(-c3ccc(-c4nc5cc(-c6ccccc6)ccc5o4)cc3)cc2)oc2ccccc12	2.374	-7.62895	4.19867	97.2686	0.282377	0.940607	1.82853	1.04812	2.5	0.587975	0.99546	0.658131	0.030285	2	4.5	-2.02213
O=C(Nc1ccc(Cl)cc1-c1ccccn1)c1cc(-c2nc3ccccc3o2)cc(C(F)(F)F)c1	2.405	-6.7764	4.40427	98.8163	-0.0281511	0.539596	1.56586	1.1438	2.5	0.735436	0.983557	0.238181	0.130474	2	4.5	-8.32064
O=C1c2cc(-c3nc4ccc(C(F)(F)F)cc4s3)ccc2C(=O)c2c(O)cccc21	2.429	-7.43477	4.33619	98.6235	0.801871	0.741019	3.35528	1.01161	2.5	0.235496	0.991472	0.8032	0.22516	2	4.5	-1.06697
Oc1cc2oc(-c3ccccc3)cc2cc1-c1ccc(-c2nc3ccccc3o2)c(O)c1	2.447	-6.94093	4.62376	98.1535	0.212676	1.0705	1.56473	1.10029	2.5	0.226871	0.979284	0.503638	0.405422	2	4.5	0.156784
CC(C)(C)c1ccc2oc(-c3ccc(-c4ccc(-c5oc6ccccc6c(=O)c5O)cc4)cc3)nc2c1	2.451	-5.91622	3.72626	98.8451	0.210304	0.478769	2.4054	1.13	2.5	0.448722	0.990098	0.321218	0.0642318	2	4.5	-0.162372
COc1cc(C(C)(C)C)ccc1C=CC(=O)c1ccc2cccc(O)c2c1O	2.456	-6.02693	4.12507	98.5514	0.0424813	0.934803	2.46079	1.12941	2.5	0.210421	0.449766	0.527571	0.742554	2	4.5	-4.33634
N#CC(=Cc1ccc2nc(-c3ccccc3O)oc2c1)C(=O)O	2.458	-3.76688	2.49551	98.6468	-0.585124	0.851093	2.77122	1.04732	2.5	0.0277595	0.953947	0.344746	0.543688	2	4.5	-7.10436
COc1ccc(N(C)C)cc1C=CC(=O)c1ccc2cccc(O)c2c1O	2.462	-4.6904	3.47251	98.0816	-0.187941	1.34741	2.92936	1.08479	2.5	0.180485	0.627086	0.86896	0.692392	2	4.5	1.6991
O=c1c(O)c(-c2ccc(-c3ccc4cccc(O)c4c3O)cc2)oc2ccc(-c3ccccc3)cc12	2.468	-4.89146	3.43561	98.334	-0.0994627	0.293848	0.588141	1.36852	2.5	0.243853	0.987144	0.807195	0.181179	2	4.5	-2.93684
COc1ccc(-c2cc3cc(-c4nc5cc(C(F)(F)F)ccc5o4)c(O)cc3o2)cc1	2.489	-6.25787	3.91713	98.2009	0.66302	1.06108	5.23238	0.856292	1.5	0.278371	0.968859	0.203399	0.131639	3	4.5	-1.48468
Oc1cc2oc(-c3ccc(-c4ccccc4)cc3)cc2cc1-c1nc2cc(C(F)(F)F)ccc2o1	2.489	-7.96972	4.66029	97.7356	0.884654	0.887443	3.96608	0.885631	2	0.426806	0.971261	0.208685	0.07975	2.5	4.5	-2.05617
CCN(CC)c1ccc(-c2ccc(-c3nc4cc(-c5nc6ccccc6o5)ccc4o3)c(O)c2)cc1	2.533	-6.73671	4.33851	98.1722	0.362483	1.10786	3.31961	0.571154	2	0.260764	0.986692	0.665311	0.201071	2.5	4.5	9.78224
CCN(CC)c1ccc(-c2ccc(-c3nc4ccc(-c5nc6ccccc6o5)cc4o3)c(O)c2)cc1	2.546	-6.70383	4.27369	98.2	0.297908	1.12059	3.39072	0.552061	2	0.255924	0.982795	0.671175	0.248961	2.5	4.5	10.6267
N#CC(=O)c1ccc(O)c(-c2nc3ccc(-c4ccc(C(F)(F)F)cc4)cc3o2)c1	2.569	-6.60592	4.13982	97.9668	0.480231	1.196	5.34172	0.836084	1.5	0.25638	0.959592	0.125684	0.015842	3	4.5	3.52654
Cc1ccc2oc(-c3ccc4oc(-c5ccc(-c6cc(C)c(C)c(C)c6)cc5)c(O)c(=O)c4c3)nc2c1	2.583	-6.28607	3.37013	98.5592	0.173499	0.858976	3.10105	1.10713	2.5	0.363246	0.992217	0.604815	0.141786	2	4.5	1.75758
CNc1ccc(C#N)cc1-c1nc2ccc(-c3cc(C(C)(C)C)ccc3O)cc2o1	2.593	-6.44752	3.40044	97.7226	0.214798	1.50008	4.41965	1.06629	2.5	0.5574	0.807028	0.275487	0.427856	2	4.5	-1.81836
COc1ccc(-c2cc3cc(-c4nc5ccc(-c6nc7ccccc7o6)cc5o4)c(O)cc3o2)cc1	2.597	-8.03382	5.00556	98.3227	0.340922	1.23128	2.5026	0.950097	2	0.219726	0.995497	0.507112	0.291459	2.5	4.5	-2.82124
CN(C)c1ccc(-c2cc3cc(-c4nc5cc(C(F)(F)F)ccc5o4)c(O)cc3o2)cc1	2.61	-5.63573	3.58316	98.5727	0.608112	0.777322	5.47401	0.765507	1.5	0.148779	0.932636	0.267244	0.268753	3	4.5	2.94752
O=c1c(O)c(-c2oc3ccc(-c4ccc(C(F)(F)F)cc4)cc3c(=O)c2O)oc2ccccc12	2.62	-4.54328	3.17787	98.6487	-0.30606	0.540287	6.74676	1.07777	2	0.282502	0.85179	0.311748	0.0819964	2.5	4.5	1.9791
COc1cc(=O)oc2c(-c3nc4ccc(-c5ccc(C#N)cc5)cc4o3)c(O)ccc12	2.633	-5.68265	3.2616	97.9274	0.178949	1.78724	2.12611	1.12553	2.5	0.615089	0.975653	0.615962	0.140505	2	4.5	4.26907
COc1ccc(OC)c(-c2nc3sc(-c4cc(C(F)(F)F)ccc4O)nc3s2)c1	2.673	-6.17158	3.94508	98.6528	0.250246	0.895128	5.5876	1.02789	2	0.243677	0.986076	0.358786	0.264228	2.5	4.5	-7.53564
COc1ccc(-c2ccc(-c3nc4ccc(-c5nc6ccc(-c7cc(C)ccc7O)cc6o5)cc4o3)c(O)c2)cc1	2.676	-7.90076	4.40002	98.1898	0.272497	1.30348	2.48765	1.0497	2.5	0.417321	0.982086	0.54679	0.174794	2	4.5	1.53146
CCN(CC)c1ccc(-c2oc3cc(-c4nc5cc(C(F)(F)F)ccc5o4)ccc3c(=O)c2O)cc1	2.68	-5.42758	3.73158	98.129	0.193728	1.09581	4.08868	0.99478	2	0.151114	0.961361	0.334828	0.158278	2.5	4.5	2.68462
N#CC(C#N)=Cc1ccc(-c2ccc3oc(-c4ccc(C(F)(F)F)cc4)c(O)c(=O)c3c2)cc1	2.68	-5.97256	3.51671	99.3484	-0.248803	0.308523	3.5559	1.0311	2.5	0.24138	0.983358	0.520952	0.510686	2	4.5	-2.09162
Nc1cc(=O)oc2c(-c3ccc4c(c3)C(=O)c3cccc(O)c3C4=O)c(O)ccc12	2.685	-7.27499	3.29853	94.9932	0.149308	6.24586	1.36474	1.28026	3	0.0707647	0.995155	0.9819	0.553115	1.5	4.5	1.19811
CCN(CC)c1ccc2cc(-c3ccc(-c4nc5cc(C(F)(F)F)ccc5o4)c(O)c3)oc2c1	2.7	-5.99291	3.60405	97.8718	0.798632	1.33188	4.79164	0.666575	2	0.157177	0.927141	0.25645	0.323339	2.5	4.5	4.66385
COc1ccc(OC)c(-c2nc3sc(-c4cc(-c5nc6ccccc6o5)ccc4O)nc3s2)c1	2.716	-7.09065	3.99333	98.0871	0.387599	1.56164	3.43859	1.11559	2.5	0.205274	0.998624	0.675442	0.445377	2	4.5	-1.93777
Cc1cc(-c2ccc(-c3cc4cc(-c5nc6cc(C(C)(C)C)ccc6o5)c(O)cc4o3)cc2)cc(C)c1C	2.722	-9.58011	4.26135	99.1032	0.647883	0.507216	4.75503	0.711614	2	0.440947	0.98619	0.256982	0.221009	2.5	4.5	3.87257
Cc1cc(-c2ccc(-c3cc4cc(-c5nc6cc(C(F)(F)F)ccc6o5)c(O)cc4o3)cc2)cc(C)c1C	2.728	-8.85345	4.05206	98.8435	0.95194	0.524563	4.73606	0.83257	2	0.473715	0.983296	0.211863	0.0890756	2.5	4.5	0.615925
CCN(CC)c1ccc(-c2ccc3oc(-c4nc5cc(C(F)(F)F)ccc5o4)c(O)c(=O)c3c2)cc1	2.74	-5.20682	3.5172	98.4034	0.175504	0.885977	4.97108	0.755596	2	0.271676	0.817341	0.460703	0.0511339	2.5	4.5	10.25
Cc1cc(-c2ccc(-c3oc4ccc(-c5nc6cc(-c7cccc(O)c7)ccc6o5)cc4c(=O)c3O)cc2)cc(C)c1C	2.76	-6.88463	3.27865	98.1811	0.218685	1.30047	2.27866	1.41392	2.5	0.545662	0.994564	0.629002	0.0706574	2	4.5	1.71877
O=C1c2cc(-c3cc(=O)oc4c(-c5nc6ccccc6o5)c(O)ccc34)ccc2C(=O)c2c(O)cccc21	2.788	-7.90981	4.05698	98.3348	-0.380922	0.8573	0.457769	1.11702	2.5	0.178573	0.997925	0.940292	0.151112	2	4.5	7.19446
CCN(CC)c1ccc2oc(-c3ccc4oc(-c5ccc(-c6cc(C)c(C)c(C)c6)cc5)c(O)c(=O)c4c3)nc2c1	2.79	-6.74405	3.72841	98.4184	0.231961	0.925877	2.91423	1.06804	2.5	0.272479	0.992759	0.725496	0.173514	2	4.5	4.76018
Cc1ccc(-c2ccc(C#N)cc2-c2nc3sc(-c4cc(C(F)(F)F)ccc4O)nc3s2)cc1	2.793	-7.88876	4.32915	99.5556	0.52787	0.380464	3.28994	1.20125	2.5	0.651461	0.981951	0.245713	0.52254	2	4.5	-2.36351
CCCCN(CCCC)c1ccc(-c2oc3cc(-c4nc5cc(C(C)(C)C)ccc5o4)ccc3c(=O)c2O)cc1	2.794	-7.14527	5.12173	98.7974	0.257905	0.58474	3.26467	1.05077	2.5	0.68867	0.911039	0.192459	0.505481	2	4.5	3.01315
COc1ccc(C#N)cc1-c1nc2sc(-c3cc(C(F)(F)F)ccc3O)nc2s1	2.808	-5.99264	3.89235	98.3976	0.264524	1.08074	4.9055	1.29587	2.5	0.441762	0.974306	0.269637	0.562389	2	4.5	-3.59588
COc1ccc(OC)c(-c2nc3sc(-c4cc(-c5cc(C(C)(C)C)ccc5O)ccc4O)nc3s2)c1	2.829	-7.50209	3.34021	98.2685	0.368165	1.2995	4.33932	1.13264	2.5	0.33644	0.991326	0.440945	0.258948	2	4.5	-7.70116
CCCCN(CCCC)c1ccc(-c2ccc3oc(-c4nc5cc(C(F)(F)F)ccc5o4)c(O)c(=O)c3c2)cc1	2.854	-6.28699	4.14893	99.1362	0.417761	0.377899	4.11739	0.849161	2	0.840542	0.599196	0.234055	0.0945004	2.5	4.5	8.70937
CCN(CC)c1ccc(-c2ccc(-c3nc4ccc(-c5nc6ccc(-c7cc(C)ccc7O)cc6o5)cc4o3)c(O)c2)cc1	2.861	-7.83446	3.86048	98.1462	0.372512	1.22539	2.31116	0.883309	2	0.27202	0.977093	0.673221	0.228627	2.5	4.5	5.73895
CCN(CC)c1ccc(-c2nc3ccc(-c4nc5ccc(-c6ccc(-c7nc8ccccc8o7)c(O)c6)cc5o4)cc3o2)cc1	2.884	-8.21524	5.16981	98.2888	0.448132	1.21571	1.15261	1.00815	2.5	0.263172	0.996595	0.594172	0.313238	2	4.5	3.12172
CCN(CC)c1ccc(-c2ccc(-c3nc4ccc(-c5nc6ccc(-c7nc8ccccc8o7)cc6o5)cc4o3)c(O)c2)cc1	2.885	-8.17433	5.10211	98.286	0.523232	1.1369	1.48564	0.935459	2	0.284354	0.996811	0.621978	0.205892	2.5	4.5	7.76717
CCN(CC)c1nc2ccc(-c3cc4cc(-c5nc6cc(C(F)(F)F)ccc6o5)c(O)cc4o3)cc2s1	2.911	-6.99333	3.977	100.008	0.54523	0.112433	3.69642	0.94704	2	0.429733	0.994551	0.29757	0.210468	2.5	4.5	0.684886
O=COc1n[nH]c2c1ccc1cccnc12	2.921	-2.54658	2.04938	90.1458	-0.0289782	6.48104	3.97015	1.04976	3	0.130823	0.962424	0.787314	0.427111	1.5	4.5	-9.80274
COc1ccc(C(C)(C)C)cc1-c1nc2sc(-c3cc(-c4cc(C(C)(C)C)ccc4O)ccc3O)nc2s1	2.943	-8.80235	3.47704	98.4287	0.384934	1.1775	4.39342	1.14397	2.5	0.326985	0.978015	0.146003	0.39215	2	4.5	-7.42771
COc1ccc(-c2ncco2)cc1-c1nc2sc(-c3cc(C(C)(C)C)ccc3O)nc2s1	2.957	-6.57392	3.24278	98.0416	0.220184	1.64323	4.23627	1.17415	2.5	0.242857	0.995894	0.34703	0.353994	2	4.5	-1.97642
N#CC(C#N)=Cc1ccc(-c2ccc3oc(-c4nc5cc(C(F)(F)F)ccc5o4)c(O)c(=O)c3c2)cc1	2.98	-6.14312	3.57942	99.3932	-0.254625	0.393274	2.53552	1.19236	2.5	0.19867	0.955601	0.560061	0.518146	2	4.5	0.54423
COc1ccc(C(C)(C)C)cc1-c1nc2sc(-c3cc(-c4ccc5cccc(O)c5c4O)ccc3O)nc2s1	3.012	-7.15543	3.08174	98.8274	0.229711	0.856961	0.81823	1.66781	2.5	0.187995	0.996842	0.57	0.640318	2	4.5	-1.46888
CCN(CC)c1ccc(-c2cc3cc(-c4nc5cc(-c6nc7cc(-c8nc9ccccc9o8)ccc7o6)ccc5o4)c(O)cc3o2)cc1	3.077	-9.52415	5.63195	98.5113	0.705892	0.98996	0.96881	1.17899	2.5	0.128454	0.998859	0.538521	0.329623	2	4.5	-0.537414
CCN(CC)c1ccc(-c2cc3cc(-c4nc5cc(-c6nc7ccc(-c8nc9ccccc9o8)cc7o6)ccc5o4)c(O)cc3o2)cc1	3.087	-9.54989	5.62392	98.4712	0.654213	1.04099	1.01035	1.12757	2.5	0.125759	0.998513	0.553106	0.412256	2	4.5	-1.89402
COc1ccc(-c2ccc[nH]2)cc1-c1nc2sc(-c3cc(-c4cc(C(C)(C)C)ccc4O)ccc3O)nc2s1	3.09	-7.70613	2.88638	98.5465	0.311265	1.28043	3.87479	1.06888	2.5	0.452522	0.996517	0.566189	0.0848764	2	4.5	-4.05325
CCN(CC)c1ccc(-c2nc3ccc(-c4nc5ccc(-c6cc7cc(-c8nc9ccccc9s8)c(O)cc7o6)cc5o4)cc3o2)cc1	3.097	-9.55826	5.38312	98.7272	0.648537	0.964301	0.704523	1.17658	2.5	0.157635	0.998449	0.693266	0.402624	2	4.5	0.794276
Cc1ccc(S(=O)(=O)Nc2nc3sc(-c4nc5ccc(-c6nc7sc(-c8ccccc8O)nc7s6)cc5o4)nc3s2)cc1	3.31	-8.59264	4.64292	99.0004	-0.0807415	0.411517	1.04988	1.06054	2.5	0.037381	0.999999	0.213316	0.831026	2	4.5	-2.76192
CC(C)(C)c1ccc(C2=Nc3ccc4ccccc4c3C2(C)C)c(-c2nc3sc(-c4cc(C(F)(F)F)ccc4O)nc3s2)c1	3.381	-9.59229	4.73703	99.8457	0.727456	0.283643	3.38705	1.11092	2.5	0.421634	0.996109	0.252125	0.541256	2	4.5	0.00484754
CC(=O)Nc1ccccc1-c1nc2ccccc2s1	1.793	-4.20379	3.22221	97.0667	0.277157	2.42271	3.16656	0.501405	2	0.0865435	0.943986	0.683709	0.582617	2	4	-8.00977
O=CNc1ccc(Cl)cc1-c1ccccc1	1.847	-3.87778	2.99283	98.7156	-0.460209	0.466416	6.28527	1.01696	2	0.213835	0.929068	0.554591	0.604077	2	4	-9.12654
O=c1c(O)c(-c2ccc(-c3ccccc3)cc2)oc2ccccc12	1.852	-4.36984	3.17912	98.1667	-0.24319	0.689776	4.71709	0.841623	2	0.304992	0.914372	0.661501	0.194483	2	4	-8.61098
CNc1ccccc1-c1nc2ccccc2o1	1.864	-3.6983	3.4954	97.3774	0.0175893	2.40934	4.2596	0.636423	2	0.123506	0.841892	0.592467	0.616745	2	4	-7.15436
O=C(Nc1ccccc1-c1ccccc1)c1nc2ccccc2o1	1.87	-4.48124	3.35776	97.2439	0.0405123	2.37903	3.78586	0.621455	2	0.474105	0.948725	0.658198	0.284562	2	4	-10.2649
O=c1c(O)c(-c2ccc(Cl)cc2)oc2ccccc12	1.886	-4.30143	2.73109	98.9643	-0.657757	0.412241	4.08856	0.821004	2	0.217533	0.916203	0.374461	0.603273	2	4	-6.26807
Cc1ccc(-c2ccc(-c3oc4ccccc4c(=O)c3O)cc2)cc1	1.91	-5.00226	3.18341	98.41	-0.226215	0.532929	4.2048	0.717257	2	0.33878	0.908701	0.648547	0.239263	2	4	-5.39633
O=C(c1ccccc1)c1ccc(-c2oc3ccccc3c(=O)c2O)cc1	1.943	-4.15974	3.10211	97.7874	-0.371348	1.10416	4.5739	0.984636	2	0.272091	0.961928	0.599446	0.430702	2	4	-8.50953
O=C(Nc1ccc(C(F)(F)F)cc1)c1nc2ccccc2[nH]1	1.949	-5.30955	3.93978	97.7153	-0.0280439	1.77313	6.32001	0.613251	1.5	0.283963	0.762914	0.489134	0.222445	2.5	4	-10.1828
Oc1cc(-c2ccc(-c3ccccc3)cc2)ccc1-c1nc2ccccc2o1	1.964	-7.49737	4.94637	97.9534	0.252799	1.10131	4.1191	0.583354	2	0.585049	0.960567	0.628694	0.0880718	2	4	-0.415785
O=c1c(O)c(-c2ccc(-c3ccccc3)cc2)oc2ccc(-c3ccccc3)cc12	1.993	-5.4206	3.67355	97.976	-0.0554481	0.493047	4.61345	0.840649	2	0.490794	0.966624	0.670298	0.0852682	2	4	-4.43716
O=C(Nc1ccc(Cl)cc1-c1ccccc1)c1nc2ccccc2o1	1.994	-5.13781	3.85182	98.6007	-0.345222	0.567147	3.57536	0.615772	2	0.630815	0.976659	0.558354	0.198961	2	4	-7.60018
O=C(Nc1ccccc1C(F)(F)F)c1nc2ccccc2[nH]1	2.015	-4.50133	3.4512	98.0583	0.0297935	1.30288	5.55579	0.897157	1.5	0.214897	0.641899	0.599875	0.338076	2.5	4	-8.20521
Oc1cc(-c2ccccc2)ccc1-c1nc2ccc(-c3ccccc3)cc2o1	2.021	-7.14196	4.81001	98.0258	0.204364	0.871014	4.31231	0.584361	2	0.495214	0.935735	0.558657	0.231271	2	4	-1.10931
O=c1c(O)c(-c2cccc(O)c2)oc2ccccc12	2.055	-3.29864	2.20027	96.2423	-0.806777	3.07149	8.08603	0.947509	1.5	0.104979	0.692548	0.560494	0.611925	2.5	4	-5.44351
N#Cc1ccc(-c2oc3ccccc3c(=O)c2O)cc1	2.063	-3.22386	2.04299	97.9188	-0.180806	1.46183	4.7997	1.39645	2.5	0.38558	0.847792	0.576567	0.553224	1.5	4	-8.8553
O=C1c2cc(NS(=O)(=O)c3ccccc3)ccc2C(=O)c2c(O)cccc21	2.064	-6.24991	3.29466	98.4031	-0.160553	0.816043	0.92253	0.849791	2	0.213632	0.996961	0.525394	0.444667	2	4	-4.21963
CN(C)c1ccc(-c2ccc(-c3nc4ccccc4o3)c(O)c2)cc1	2.096	-4.7486	3.87289	98.3959	-0.00258774	1.05442	5.5073	0.467393	1.5	0.245421	0.901897	0.696475	0.295892	2.5	4	9.80087
CCCCCCc1ccc(-c2ccc3oc(-c4ccccc4)c(O)c(=O)c3c2)cc1	2.103	-4.72801	3.95599	99.8081	0.572195	0.103566	3.8233	0.655464	2	0.834255	0.912631	0.257088	0.229617	2	4	-4.96134
Oc1ccc(-c2ccc(C(F)(F)F)cc2)cc1-c1nc2ccccc2o1	2.109	-6.30045	4.27073	97.8033	0.557637	1.13249	6.72554	0.708969	1.5	0.448667	0.856777	0.20961	0.133188	2.5	4	-3.96426
O=C(Nc1ccc(Cl)cc1C(Cl)Cl)c1ccccc1O	2.113	-5.57428	3.7136	99.2006	-0.60359	0.349993	3.51938	0.985417	2	0.162508	0.0853224	0.802179	0.999457	2	4	-3.32531
Oc1cc(-c2ccc(C(F)(F)F)cc2)ccc1-c1nc2ccccc2o1	2.121	-6.34165	4.21257	97.3215	0.485948	1.46181	6.12489	0.614446	1.5	0.419445	0.831001	0.208043	0.133247	2.5	4	-7.81338
CN(c1ccccc1)c1ccc(-c2oc3ccccc3c(=O)c2O)cc1	2.129	-4.61883	3.40121	98.6755	-0.286251	0.494636	4.89747	0.678808	2	0.117488	0.87512	0.52937	0.675024	2	4	-5.28247
O=c1c(O)c(-c2ccccc2)oc2ccc(-c3ccc(C(F)(F)F)cc3)cc12	2.132	-4.73431	3.36658	98.0635	0.290271	0.578512	6.38843	0.964551	1.5	0.3858	0.940875	0.230926	0.0751485	2.5	4	-7.67122
O=C1c2ccccc2C(=O)c2c(O)cc(C(F)(F)F)cc21	2.134	-5.5837	3.58864	97.0351	0.724855	2.18797	5.21039	1.05094	2	0.135984	0.88841	0.628447	0.671864	2	4	-1.31552
O=c1c(O)c(-c2ccc(Cl)cc2-c2ccccc2)oc2ccc(-c3ccccc3)cc12	2.146	-4.91235	3.23726	99.1158	-0.353079	0.12819	3.91673	0.743017	2	0.503403	0.969852	0.36959	0.277136	2	4	-4.64749
CNc1ccc(C(C)(C)C)cc1-c1nc2ccccc2o1	2.16	-5.62624	4.11417	97.6841	0.113527	1.83313	6.50183	0.45573	1.5	0.175475	0.77973	0.259482	0.499272	2.5	4	-5.17429
O=C(Nc1ccc(Cl)cc1C(F)(F)F)c1nc2ccccc2o1	2.171	-5.17384	3.89271	98.8701	-0.142843	0.727003	4.82454	0.757788	2	0.493254	0.919937	0.370103	0.290809	2	4	-5.55215
Oc1cc(-c2ccccc2)ccc1-c1nc2ccc(C(F)(F)F)cc2o1	2.183	-6.00483	4.2332	97.7102	0.520525	1.04552	6.05051	0.618801	1.5	0.38252	0.758011	0.187837	0.174487	2.5	4	-6.4292
O=C1c2cc(-c3ccc(-c4ccccc4)cc3O)ccc2C(=O)c2c(O)cccc21	2.185	-7.74312	4.1262	97.9044	0.196099	0.891662	2.32119	1.00337	2.5	0.366227	0.984958	0.945996	0.280937	1.5	4	2.31628
O=CNc1ccc(Cl)cc1-c1nc2ccccc2s1	2.186	-4.7626	3.6037	99.083	-0.263946	0.574504	4.95007	0.572164	2	0.149345	0.983179	0.669285	0.500181	2	4	-11.1725
O=CNc1ccc(-c2oc3ccccc3c(=O)c2O)cc1	2.194	-3.63617	1.83928	98.6942	-0.687372	1.12124	4.51697	0.981198	2	0.07316	0.983693	0.852043	0.281008	2	4	-7.96682
O=c1c(O)c(-c2cc3ccccc3o2)oc2ccccc12	2.211	-3.56834	2.64738	98.7477	-0.561464	0.498165	4.82305	0.794674	2	0.117381	0.714065	0.621637	0.529916	2	4	-2.8195
Oc1cc2oc(-c3ccccc3)cc2cc1-c1nc2ccccc2s1	2.215	-7.35548	4.53613	98.3924	0.292846	0.821662	3.61092	0.657096	2	0.194622	0.973962	0.613915	0.459367	2	4	-5.33602
Oc1cc(-c2cccs2)ccc1-c1nc2ccc(-c3ccccc3)cc2o1	2.22	-6.96132	4.43331	98.1926	0.315454	0.982655	4.08548	0.535485	2	0.494248	0.997791	0.678271	0.203083	2	4	-0.519233
O=c1c(O)c(-c2ccc(-c3ccc(-c4nc5ccccc5o4)cc3)cc2)oc2ccccc12	2.224	-6.4006	3.91546	97.6491	0.0873678	1.04906	2.1677	0.943583	2	0.366537	0.989249	0.64494	0.0850898	2	4	-2.3507
COc1ccc(-c2ccc(-c3nc4ccc(C(F)(F)F)cc4o3)c(O)c2)cc1	2.235	-6.03179	3.91362	98.2922	0.466007	0.928973	6.5898	0.590265	1.5	0.49073	0.878372	0.242107	0.0891698	2.5	4	2.29073
COc1ccc(C(C)(C)C)cc1-c1ccc(-c2nc3ccccc3o2)c(O)c1	2.241	-6.82048	4.06247	98.5679	0.184826	0.956436	6.19326	0.413831	1.5	0.384532	0.860382	0.263618	0.189169	2.5	4	2.06931
Oc1cc(-c2ccccc2)ccc1-c1nc2ccc(-c3ccc(C(F)(F)F)cc3)cc2o1	2.245	-7.60367	4.50896	97.4656	0.72883	0.910898	5.54073	0.621281	1.5	0.671634	0.934536	0.246002	0.0533033	2.5	4	4.247
Oc1cc2oc(-c3ccc(-c4ccccc4)cc3)cc2cc1-c1nc2ccccc2o1	2.261	-7.94888	4.99048	98.2203	0.381671	0.818287	3.23941	0.719765	2	0.313237	0.976889	0.567571	0.255356	2	4	0.0586025
Oc1cc2oc(-c3ccc(-c4ccccc4)cc3)cc2cc1-c1nc2ccccc2s1	2.261	-8.66913	5.06936	98.7147	0.539322	0.538389	3.16887	0.680506	2	0.358449	0.980588	0.69504	0.212136	2	4	-2.96227
N#Cc1ccc(-c2ccc3c(c2)C(=O)c2cccc(O)c2C3=O)cc1-c1ccccc1	2.27	-8.31633	4.28521	98.6699	0.610018	0.906656	2.35292	1.00653	2.5	0.642718	0.992426	0.926982	0.220339	1.5	4	0.882916
O=c1c(O)c(-c2ccc(Cl)cc2C(F)(F)F)oc2ccccc12	2.273	-4.39076	3.15737	99.261	-0.367527	0.351055	5.03241	0.967809	1.5	0.223814	0.809748	0.19671	0.49061	2.5	4	-5.46724
COc1ccc2nc(-c3ccc4c(c3)C(=O)c3cccc(O)c3C4=O)oc2c1	2.277	-6.80898	3.76927	97.5754	0.373925	2.02953	2.88903	1.17978	2.5	0.122518	0.991066	0.902787	0.628523	1.5	4	-0.621966
COc1ccc(-c2ccc3c(c2)C(=O)c2cccc(O)c2C3=O)cc1C(F)(F)F	2.28	-6.7104	3.66975	98.5513	0.878511	0.672397	4.26347	1.076	2.5	0.338408	0.977465	0.853379	0.154464	1.5	4	6.781
Oc1ccc(-c2ccc(Cl)cc2C(F)(F)F)cc1-c1nc2ccccc2s1	2.281	-6.5029	3.95682	99.3611	0.249651	0.240954	5.8484	0.593654	1.5	0.479398	0.852566	0.284264	0.279702	2.5	4	-3.35201
O=c1c(O)c(-c2ccc(-c3ccc(-c4ccc(N(c5ccccc5)c5ccccc5)cc4)cc3)cc2)oc2ccccc12	2.288	-8.14624	4.39559	98.1678	0.502844	0.393774	2.12882	0.719655	2	0.676469	0.994105	0.536545	0.270956	2	4	-2.23519
Oc1cc(-c2ccc(Cl)cc2C(F)(F)F)ccc1-c1nc2ccccc2o1	2.293	-6.11215	4.15169	98.6341	0.382921	0.512173	4.92957	0.625682	2	0.41107	0.860094	0.184716	0.333394	2	4	3.55096
O=c1c(O)c(-c2ccc(N(c3ccccc3)c3ccccc3)cc2)oc2ccc(-c3ccccc3)cc12	2.294	-6.15912	4.31226	98.7441	0.232451	0.290503	2.71541	0.743275	2	0.223306	0.963412	0.299918	0.909854	2	4	1.63104
Cc1ccc(-c2ccc3oc(-c4ccc(-c5cc(C)c(C)c(C)c5)cc4)c(O)c(=O)c3c2)cc1	2.32	-6.48081	3.41189	98.7761	0.183011	0.533663	4.9198	0.698485	2	0.580663	0.97929	0.659977	0.116651	2	4	-4.84565
O=C(Nc1ccc(Cl)cc1C(Cl)Cl)c1nc2ccccc2s1	2.334	-5.39602	3.77688	99.426	-0.00975488	0.393991	3.12145	1.0304	2.5	0.154108	0.3968	0.933285	0.998302	1.5	4	-4.36718
COc1ccc(-c2ccc(-c3nc4ccc(-c5nc6ccccc6o5)cc4o3)c(O)c2)cc1	2.342	-7.16491	4.70316	98.2202	0.230515	1.17099	3.34044	0.71248	2	0.39732	0.986563	0.544487	0.191529	2	4	5.14102
O=c1c(O)c(-c2ccc(-c3ccc(NC(F)(F)F)cc3)cc2)oc2ccccc12	2.355	-5.30866	3.26225	98.2092	-0.18339	0.7009	4.79864	0.892335	2	0.578543	0.959927	0.414356	0.0112666	2	4	-5.35744
CCCCCCc1ccc(-c2cc3cc(-c4nc5ccccc5o4)c(O)cc3o2)cc1	2.369	-7.04654	4.64267	99.9151	0.993526	0.164733	3.04465	0.741444	2	0.67141	0.852835	0.197021	0.598022	2	4	1.06404
O=C(Nc1ccc(Cl)cc1-c1ccccc1)c1nc2ccc(-c3nc4ccccc4o3)cc2o1	2.384	-6.85902	4.60737	98.6408	-0.0393768	0.627813	2.32377	0.686763	2	0.653112	0.995417	0.500254	0.194937	2	4	-0.824241
Oc1cc2oc(-c3ccc(-c4ccccc4)cc3)cc2cc1-c1nc2cc(-c3ccccc3)ccc2o1	2.391	-9.1912	5.50413	97.8566	0.551097	0.690108	2.93766	0.783944	2	0.53843	0.989305	0.581567	0.101831	2	4	2.77433
O=C(c1nc2ccc(-c3ccccc3)cc2[nH]1)c1ccc2cccc(O)c2c1O	2.391	-4.42333	3.53856	98.227	-0.0483102	0.777763	1.16128	1.09516	2.5	0.269565	0.963074	0.907266	0.352674	1.5	4	-4.06748
N#CC(=O)Nc1cccc2ccc3cccnc3c12	2.392	-3.76267	2.7401	97.7172	-0.270944	2.16521	2.79963	0.892941	2	0.120873	0.996905	0.725699	0.130581	2	4	-9.22418
CN(C)c1ccc(-c2cc3cc(-c4nc5ccccc5o4)c(O)cc3o2)cc1	2.394	-5.48798	3.95685	98.5018	0.155306	1.01252	4.76665	0.612797	2	0.0967086	0.945403	0.644779	0.592557	2	4	4.10004
O=C(Nc1ccc(Cl)cc1-c1cn2ccccc2n1)C(F)(F)F	2.395	-3.88367	3.14527	98.8453	-0.0777072	0.60822	4.22705	1.00582	2.5	0.246239	0.793247	0.577835	0.706016	1.5	4	-8.49559
O=c1c(O)c(-c2ccc(C(F)(F)F)cc2)oc2ccc(-c3ccc(-c4ccc(C(F)(F)F)cc4)cc3)cc12	2.399	-6.12332	3.46973	96.9974	0.663834	0.855916	5.8786	1.09276	2	0.814689	0.968995	0.10985	0.00201752	2	4	-3.964
COc1cc(=O)oc2c(-c3nc4ccccc4s3)c(O)ccc12	2.399	-5.20129	3.42332	98.4261	-0.184374	1.08839	3.57717	0.642539	2	0.0909223	0.890086	0.660519	0.500437	2	4	-1.44277
O=C(c1ccc(-c2cccs2)cc1O)c1ccc2cccc(O)c2c1O	2.402	-4.71571	3.68702	97.5124	-0.486747	1.48278	1.07666	1.16849	2.5	0.167366	0.997611	0.899432	0.368525	1.5	4	-3.64202
CNc1ccc(C(C)(C)C)cc1-c1nc2ccc(-c3ccc(C(C)(C)C)cc3)cc2o1	2.404	-9.24325	4.88269	98.2754	0.395889	0.893654	6.67365	0.479359	1.5	0.534065	0.914523	0.127466	0.187799	2.5	4	-6.93859
O=c1c(O)c(-c2oc3ccccc3c(=O)c2O)oc2ccccc12	2.406	-2.33324	1.84488	98.7936	-0.793974	0.726141	6.20075	0.966991	1.5	0.0775441	0.69924	0.623823	0.604687	2.5	4	4.48446
Cc1cc(-c2ccc3oc(-c4ccc(C(F)(F)F)cc4)c(O)c(=O)c3c2)cc(C)c1C	2.413	-5.30345	3.55792	99.0076	0.231971	0.474488	7.50075	0.898221	1.5	0.421523	0.926313	0.247069	0.0820692	2.5	4	1.14951
Cc1cc(-c2oc3ccc(-c4ccc(C(F)(F)F)cc4)cc3c(=O)c2O)cc(C)c1C	2.423	-5.32925	3.54442	99.1974	0.301485	0.393676	8.52883	0.768199	1.5	0.395973	0.892557	0.240011	0.116759	2.5	4	-0.330255
CN(C)c1ccc(-c2ccc3nc(-c4oc5ccccc5c(=O)c4O)sc3c2)cc1	2.426	-5.13219	3.11318	98.713	-0.0649242	0.769691	4.21271	0.716842	2	0.267379	0.977875	0.872757	0.211724	2	4	4.44167
COc1cc(=O)oc2c(-c3nc4ccccc4o3)c(O)ccc12	2.435	-4.69056	3.19589	98.3522	-0.32225	1.20783	2.52269	0.900522	2	0.101759	0.86502	0.528509	0.315578	2	4	0.443468
CCN(CC)c1ccc(-c2oc3cc(OC(C)(C)C)ccc3c(=O)c2O)cc1	2.437	-4.91868	3.74929	98.3986	0.0383804	1.0025	6.37889	0.469452	1.5	0.105134	0.786412	0.494492	0.277506	2.5	4	-0.524742
O=CNc1ccc(Cl)cc1-c1oc2ccccc2c(=O)c1O	2.437	-4.40313	2.05007	98.9659	-0.702759	0.540916	3.81881	0.822932	2	0.0998476	0.983722	0.579504	0.451391	2	4	-5.97338
CCN(CC)c1ccc(-c2ccc(-c3nc4cc(-c5ccccc5O)ccc4o3)c(O)c2)cc1	2.446	-6.33034	3.54589	98.2418	0.0363365	0.950076	3.80258	0.521534	2	0.229983	0.882431	0.715868	0.229531	2	4	11.2699
O=C1c2cc(-c3cc(O)c4c(c3)C(=O)c3ccccc3C4=O)ccc2C(=O)c2c(O)cccc21	2.452	-9.2333	4.01465	95.7859	0.530148	5.24527	1.39794	1.17076	3	0.183804	0.999061	0.990116	0.724708	1	4	4.36621
CCN(CC)c1ccc(-c2oc3ccc(-c4nc5ccccc5o4)cc3c(=O)c2O)cc1	2.453	-4.81453	3.58469	98.229	-0.110905	1.24921	3.66992	0.718393	2	0.0873044	0.970451	0.693895	0.403391	2	4	6.96923
N#CC(=O)c1ccc(-c2cccs2)cc1O	2.457	-4.44117	3.24457	98.4935	-0.627679	1.08702	5.11235	0.789862	1.5	0.113949	0.989611	0.59483	0.104105	2.5	4	-4.63123
O=C1c2cc(-c3cc4cc(-c5ccccc5)c(O)cc4o3)ccc2C(=O)c2c(O)cccc21	2.459	-8.16085	4.22631	97.9386	0.458692	0.96994	1.07043	1.30871	2.5	0.13185	0.985468	0.918944	0.690736	1.5	4	4.16126
CNc1ccc(C)cc1-c1nc2ccc(-c3cc(-c4ccccc4O)ccc3O)cc2o1	2.467	-6.25902	3.3453	98.0587	-0.104852	1.51923	4.9366	0.806138	2	0.27109	0.882819	0.635539	0.407386	2	4	-0.817717
CCCCCCc1ccc2oc(N(C)C)c(O)c(=O)c2c1	2.472	-4.27032	3.75401	98.975	0.621708	0.68244	5.18242	0.505774	1.5	0.384642	0.471866	0.291633	0.497257	2.5	4	-3.92847
CN(C)c1ccc(-c2cc3cc(-c4nc5cc(-c6ccccc6)ccc5o4)c(O)cc3o2)cc1	2.472	-6.91544	4.43277	98.6356	0.399246	0.611878	4.35182	0.662523	2	0.214958	0.974288	0.657783	0.324701	2	4	6.98398
CC(C)(C)c1ccc2oc(-c3ccc(-c4ccc5nc(-c6ccccc6O)[nH]c5c4)cc3)nc2c1	2.473	-7.61696	3.90334	99.2045	0.572544	0.37408	2.70661	0.992173	2	0.54071	0.982087	0.491405	0.0990617	2	4	0.623225
CCN(CC)c1ccc(-c2cc3cc(-c4nc5ccccc5o4)c(O)cc3o2)cc1	2.475	-5.89593	3.9176	98.28	0.195231	1.13342	4.44142	0.496872	2	0.0927525	0.943733	0.659226	0.631184	2	4	1.0986
O=C1c2cc(-c3nc4ccc(-c5ccc(C(F)(F)F)cc5)cc4s3)ccc2C(=O)c2c(O)cccc21	2.491	-8.63172	4.31238	98.6679	0.933134	0.547161	2.73763	1.08212	2.5	0.537066	0.996869	0.851735	0.0574966	1.5	4	-1.34678
CCN(CC)c1ccc(-c2ccc(-c3nc4ccc(OC(C)(C)C)cc4o3)c(O)c2)cc1	2.492	-7.31184	3.82082	98.792	0.328317	0.687964	6.06714	0.331669	1.5	0.286656	0.879952	0.430922	0.147238	2.5	4	10.3872
COc1ccc(C#N)cc1-c1ccc(-c2nc3ccc(C(F)(F)F)cc3o2)c(O)c1	2.496	-5.79775	3.82777	98.7906	0.642003	0.715697	6.25464	1.0548	2	0.736864	0.855841	0.200737	0.116463	2	4	2.94338
CCCCN(CCCC)c1ccc2oc(-c3ccc(C(F)(F)F)cc3)c(O)c(=O)c2c1	2.502	-5.73739	4.44508	99.1367	0.211033	0.31059	5.97563	0.616547	1.5	0.689435	0.509966	0.144402	0.425968	2.5	4	-3.14459
O=c1c(O)c(-c2ccc(N(c3ccccc3)c3ccccc3)cc2)oc2ccc(-c3ccc(C(F)(F)F)cc3)cc12	2.504	-6.27897	3.60481	98.8336	0.651213	0.187009	3.27451	0.906203	2	0.373672	0.964581	0.0989972	0.639381	2	4	0.596949
O=CNc1ccc2nc(-c3nc4ccccc4[nH]3)oc2c1	2.504	-3.71793	2.8245	97.3087	-0.257466	2.10533	3.49325	1.03714	2.5	0.102586	0.943631	0.867544	0.379874	1.5	4	-6.3263
CCN(CC)c1ccc(-c2ccc3oc(C(F)(F)F)c(O)c(=O)c3c2)cc1	2.506	-5.21846	3.69292	98.6658	0.157819	0.749766	7.85569	0.848634	1.5	0.164563	0.837329	0.691798	0.175778	2.5	4	-0.258612
Cc1cc(-c2ccc(-c3oc4ccc(-c5nc6ccccc6o5)cc4c(=O)c3O)cc2)cc(C)c1C	2.51	-5.71953	3.49507	98.4478	0.190628	1.01459	3.56485	0.918081	2	0.34626	0.993317	0.616624	0.123883	2	4	1.60293
CC(C)(C)c1ccc(-c2cc(C(=O)Nc3ccc(Cl)cc3-c3ccccn3)cc(-c3nc4ccccc4o3)c2)cc1	2.512	-8.70529	4.48597	99.406	0.199477	0.258159	3.72047	0.561749	2	0.886074	0.993893	0.271441	0.14145	2	4	-0.831844
Cc1cc(-c2ccc(-c3cc4cc(-c5nc6ccccc6o5)c(O)cc4o3)cc2)cc(C)c1C	2.517	-8.34108	4.18907	98.5909	0.547791	0.894064	4.11329	0.658054	2	0.355404	0.986599	0.572262	0.278991	2	4	2.69681
O=c1cc(C(F)(F)F)c2ccc(O)c(-c3nc4ccccc4s3)c2o1	2.523	-5.52439	3.73072	98.8115	0.0153497	0.607617	3.1918	0.812994	2	0.111253	0.880129	0.381598	0.309513	2	4	-0.782643
CCN(CC)c1ccc(-c2ccc3oc(-c4nc5ccccc5o4)c(O)c(=O)c3c2)cc1	2.533	-5.13864	4.02639	98.375	-0.0974318	0.962849	4.43183	0.548002	2	0.185601	0.885824	0.818795	0.133564	2	4	10.5163
O=c1c(O)c(-c2ncco2)oc2ccccc12	2.539	-2.24707	1.53938	95.0172	-0.438852	3.99111	5.89396	1.59223	2	0.0847142	0.821119	0.543724	0.383051	2	4	-2.56154
CC(C)(C)N(c1ccccc1)c1ccc(-c2ccc3c(c2)C(=O)c2cccc(O)c2C3=O)cc1	2.543	-7.6797	4.58371	99.1733	0.581431	0.465298	4.07846	0.654587	2	0.232481	0.989645	0.902853	0.182112	2	4	4.89179
COc1ccc2nc(-c3ccc(-c4nc5ccc(-c6ccc(C#N)cc6)cc5o4)c(O)c3)oc2c1	2.544	-7.29493	4.23448	97.6476	0.402592	1.86267	2.82334	1.13621	2.5	0.746032	0.994582	0.560606	0.162539	1.5	4	7.19495
Oc1ccc(-c2ccc3nc(C(F)(F)F)oc3c2)cc1-c1nc2ccccc2s1	2.548	-6.53386	3.9565	98.9278	0.451415	0.528986	4.91175	0.812244	2	0.516907	0.715927	0.410235	0.133812	2	4	-7.42378
CCN(CC)c1ccc(-c2cc3cc(-c4nc5cc(C)ccc5o4)c(O)cc3o2)cc1	2.551	-6.41054	4.01391	98.2769	0.21224	1.11566	4.46069	0.514677	2	0.0988785	0.934776	0.651146	0.659683	2	4	1.43725
CNc1cc(=O)oc2c(-c3nc4ccccc4o3)c(O)ccc12	2.552	-4.57896	2.90615	98.1031	-0.288303	1.59393	2.96021	0.633751	2	0.0972194	0.94991	0.622313	0.37385	2	4	1.0355
CNc1ncc(-c2ccc3c(c2)C(=O)c2cccc(O)c2C3=O)o1	2.555	-6.07238	3.30007	97.477	0.229335	2.67732	4.15893	0.896751	2	0.114575	0.981214	0.934717	0.120559	2	4	-3.30564
CCN(CC)c1ccc(-c2cc3cc(-c4nc5ccc(C)cc5o4)c(O)cc3o2)cc1	2.557	-6.41343	4.03179	98.307	0.199729	1.08876	4.70714	0.498657	2	0.101271	0.940001	0.641399	0.646961	2	4	1.83349
CCN(CC)c1ccc(-c2cc3cc(-c4nc5cc(-c6ccccc6)ccc5o4)c(O)cc3o2)cc1	2.558	-7.18795	4.22525	98.4553	0.484521	0.741236	3.89683	0.560473	2	0.207275	0.973477	0.671971	0.361353	2	4	4.92162
CCN(CC)c1ccc(-c2oc3cc(-c4nc5cc(-c6ccccc6)ccc5o4)ccc3c(=O)c2O)cc1	2.568	-5.28049	3.70395	98.2181	0.249804	0.912445	3.04797	0.869508	2	0.21456	0.985349	0.72511	0.196822	2	4	3.81002
CCN(CC)c1ccc(-c2ccc3c(c2)C(=O)c2cc(-c4nc5ccccc5o4)cc(O)c2C3=O)cc1	2.569	-8.30606	4.00147	98.3099	0.658281	1.24145	4.08506	0.494143	2	0.275007	0.998728	0.966887	0.246585	2	4	6.3439
O=C1c2cc(-c3oc4ccc(-c5ccc(-c6ccccc6)cc5)cc4c(=O)c3O)ccc2C(=O)c2c(O)cccc21	2.572	-7.58685	3.67403	98.317	0.278738	0.416853	1.68689	1.14906	2.5	0.46969	0.998898	0.956002	0.0741438	1.5	4	0.28161
CCCCN(CCCC)c1ccc(-c2ccc(-c3nc4ccc(C(F)(F)F)cc4o3)c(O)c2)cc1	2.577	-7.48673	4.52307	99.2202	0.621594	0.31	5.52466	0.358743	1.5	0.876133	0.652568	0.162558	0.211831	2.5	4	7.71365
Cc1cc(-c2ccc3oc(N(C)C)c(O)c(=O)c3c2)cc(C)c1C	2.58	-4.93223	3.35212	97.5402	0.191693	2.38542	8.31144	0.753565	1.5	0.16574	0.904909	0.699682	0.212708	2.5	4	-3.39352
COc1ccc(-c2cccc(O)c2)cc1-c1nc2sc(-c3ccccc3O)nc2s1	2.58	-5.96607	3.7036	97.8415	0.166762	1.68205	4.57772	0.92796	2	0.1901	0.989576	0.684578	0.662104	2	4	-3.6905
COc1ccc(-c2cc(O)c3c(c2)C(=O)c2cc(-c4nc5cc(C(C)(C)C)ccc5o4)ccc2C3=O)cc1	2.581	-8.37232	3.58092	98.911	0.72224	0.682419	2.92143	1.18792	2.5	0.439961	0.998894	0.78364	0.2602	1.5	4	-1.10606
CC(C)(C)c1ccc(-c2ccc3nc(-c4ccc(-c5ccc6c(c5)C(=O)c5cccc(O)c5C6=O)cc4)oc3c2)cc1	2.585	-9.89079	3.8613	99.2588	0.938672	0.36237	1.57939	1.20401	2.5	0.684024	0.99893	0.861703	0.0572527	1.5	4	3.83109
CNc1ccc(C(C)(C)C)cc1-c1nc2ccc(-c3cc(C(C)(C)C)ccc3O)cc2o1	2.592	-8.17773	4.1585	97.2515	0.22292	2.00434	5.17562	0.740095	1.5	0.303634	0.787538	0.106108	0.2873	2.5	4	-5.78277
N#Cc1cc(=O)oc2c(-c3nc4ccccc4s3)c(O)ccc12	2.598	-5.22977	3.2809	98.489	-0.0588631	1.3051	2.96776	0.998813	2	0.188288	0.935118	0.627484	0.593986	2	4	0.488863
O=C(c1nc2ccc(-c3cccs3)cc2[nH]1)c1ccc2cccc(O)c2c1O	2.6	-5.15133	3.49895	97.9981	-0.182256	1.18569	0.915219	1.08756	2.5	0.265928	0.998638	0.941202	0.301379	1.5	4	-2.47191
CCN(CC)c1ccc(-c2ccc3oc(-c4nc5cc(C)ccc5o4)c(O)c(=O)c3c2)cc1	2.607	-5.39003	3.97786	98.2565	-0.0755695	1.11037	4.33648	0.610034	2	0.199258	0.875035	0.808177	0.148587	2	4	12.3894
O=c1c(O)c(-c2ccc(-c3ccc(C(F)(F)F)cc3)cc2O)oc2ccc(-c3ccc(C(F)(F)F)cc3)cc12	2.61	-5.56121	3.30646	97.1458	0.417276	0.866015	6.77645	1.12574	2	0.723203	0.940388	0.0946852	0.00786289	2	4	-3.91243
COc1cc(=O)oc2c(-c3ccc4c(c3)C(=O)c3cccc(O)c3C4=O)c(O)ccc12	2.615	-6.55619	3.39174	96.8475	-0.0129061	2.98046	1.80809	1.21724	2.5	0.0937541	0.990895	0.945103	0.443547	1.5	4	4.27665
O=CNc1ccc2nc(-c3oc4ccccc4c(=O)c3O)oc2c1	2.626	-3.73892	1.75315	98.5937	-0.608766	1.16717	2.71606	1.10919	2.5	0.0512852	0.926228	0.848441	0.43865	1.5	4	-0.264421
O=CNc1cc(O)c2c(ccc3cc(-c4nc5ccccc5s4)cnc32)c1	2.628	-5.55428	3.33542	98.1478	-0.038528	1.17434	3.64023	0.577024	2	0.18251	0.996922	0.93966	0.211161	2	4	-8.1323
Cc1cc(-c2ccc(-c3cc4cc(-c5nc6cc(-c7ccccc7)ccc6o5)c(O)cc4o3)cc2)cc(C)c1C	2.628	-9.28474	4.65132	98.8879	0.784449	0.558333	3.67149	0.732499	2	0.585084	0.993831	0.586217	0.113421	2	4	3.01947
CCN(CC)c1ccc(-c2oc3cc(OC#N)ccc3c(=O)c2O)cc1	2.63	-4.88149	3.27703	97.4651	-0.252511	1.95711	5.0589	0.684433	1.5	0.0763165	0.990115	0.430999	0.057538	2.5	4	-1.35399
CN(C)c1cc(=O)oc2c(-c3nc4ccccc4o3)c(O)ccc12	2.638	-4.48568	3.1018	96.6833	-0.148106	3.2473	3.05153	0.75374	2	0.0772555	0.907603	0.577754	0.507915	2	4	7.72936
CCN(CC)c1ccc(-c2ccc3c(c2)C(=O)c2cc(-c4nc5cc(C)ccc5o4)cc(O)c2C3=O)cc1	2.641	-8.53938	3.89244	98.2649	0.650662	1.22763	3.66517	0.570604	2	0.286101	0.998598	0.96541	0.273703	2	4	6.6131
COc1ccc(-c2nc3sc(-c4cc(-c5ccccc5O)ccc4O)nc3s2)c(OC)c1	2.642	-5.81686	3.41605	98.1891	0.102104	1.38368	4.64961	0.937232	2	0.18089	0.984895	0.678871	0.591951	2	4	-1.68018
CCCCN(CCCC)c1ccc(-c2ccc(-c3nc4cc(-c5ccc(C(F)(F)F)cc5)ccc4o3)c(O)c2)cc1	2.647	-8.25696	4.57973	99.2833	0.874171	0.220777	4.79672	0.453842	2	0.956611	0.885879	0.198688	0.051645	2	4	10.5597
CCN(CC)c1ccc(-c2ccc(-c3nc4ccc(-c5cc(C(C)(C)C)ccc5O)cc4o3)c(O)c2)cc1	2.662	-8.24404	3.7641	98.2094	0.141359	1.04484	4.35324	0.525545	2	0.380424	0.919003	0.480796	0.136421	2	4	7.81493
CN(C)c1ccc(-c2ccc3oc(-c4nc5cc(C(F)(F)F)ccc5o4)c(O)c(=O)c3c2)cc1	2.664	-5.24018	3.1077	98.762	0.107539	0.74516	5.00026	0.925337	1.5	0.289108	0.822415	0.443847	0.0446869	2.5	4	8.73183
CCN(CC)c1ccc(-c2ccc3c(c2)C(=O)c2cc(OC#N)cc(O)c2C3=O)cc1	2.664	-7.86024	3.98824	98.3067	0.516216	1.28556	3.8528	0.74051	2	0.251513	0.999599	0.893756	0.0193353	2	4	5.26213
CCCCCCc1ccc2oc(-c3cc4cc(-c5ccc(N(CC)CC)cc5)oc4cc3O)nc2c1	2.665	-7.89998	4.46606	99.6157	0.890794	0.264171	3.37269	0.573068	2	0.527525	0.862069	0.264245	0.675277	2	4	1.76589
FC(F)(F)c1n[nH]c2c1ccc1cccnc12	2.67	-2.99354	2.66511	97.1031	0.088006	2.38056	7.13363	1.26755	2	0.197847	0.897024	0.650659	0.52715	2	4	-6.96897
CCN(CC)c1ccc(-c2oc3cc(-c4nc5cc(C(C)(C)C)ccc5o4)ccc3c(=O)c2O)cc1	2.673	-6.29417	4.08413	98.3237	0.0635878	1.05204	3.86493	0.920316	2	0.135519	0.968345	0.394915	0.350511	2	4	2.58796
CCN(CC)c1oc2ccc(N(C)C)cc2c(=O)c1O	2.675	-4.19761	2.76204	92.2262	0.150402	7.23779	8.80117	0.917125	2	0.0619111	0.731313	0.602438	0.550988	2	4	-3.57962
CCN(CC)c1nc2ccc(-c3ccc(-c4nc5cc(C(F)(F)F)ccc5o4)c(O)c3)cc2s1	2.68	-7.00565	3.83096	100.022	0.48327	0.0977952	4.69022	0.643893	2	0.670452	0.9917	0.348784	0.0903459	2	4	1.40517
CCN(CC)c1ccc(-c2ccc(-c3nc4ccc(-c5nc6ccc(-c7ccccc7)cc6o5)cc4o3)c(O)c2)cc1	2.681	-7.76367	4.6702	98.451	0.579767	0.765944	2.7036	0.700851	2	0.464242	0.992518	0.694568	0.14285	2	4	9.59234
CCCCN(CCCC)c1oc2ccc(C(F)(F)F)cc2c(=O)c1O	2.684	-5.61027	4.47595	99.3151	0.469827	0.237268	7.35126	0.667192	1.5	0.478438	0.132419	0.103241	0.805221	2.5	4	-4.48983
CCN(CC)c1ccc(-c2cc3cc(-c4nc5cc(C(F)(F)F)ccc5o4)c(O)cc3o2)cc1	2.685	-6.06027	3.49839	98.24	0.628519	0.979579	5.11841	0.610083	1.5	0.14303	0.930605	0.279898	0.301913	2.5	4	0.0431798
O=C1c2cc(-c3ccc(Nc4ncc(-c5ccc(-c6ccccc6)c(O)c5)o4)cc3)ccc2C(=O)c2c(O)cccc21	2.69	-9.44271	4.59427	98.2097	0.536582	0.852627	0.460287	1.10012	2.5	0.654614	0.999529	0.954786	0.0298371	1.5	4	-2.1207
CCN(CC)c1ccc(-c2cc3cc(-c4nc5cc(-c6cccc(O)c6)ccc5o4)c(O)cc3o2)cc1	2.692	-6.20291	3.64734	97.9857	0.236152	1.51968	3.27521	0.786531	2	0.191384	0.954708	0.676414	0.470312	2	4	5.74247
CCN(CC)c1ccc(-c2cc3cc(-c4nc5cc(-c6ccccc6O)ccc5o4)c(O)cc3o2)cc1	2.694	-6.52222	3.56557	98.262	0.200563	0.992438	2.68735	0.734174	2	0.0949224	0.924198	0.658083	0.518366	2	4	5.27074
CCCCN(CCCC)c1oc2ccc(N(C)C)cc2c(=O)c1O	2.696	-5.00969	4.0023	97.9449	0.327109	1.84571	7.07919	0.672326	1.5	0.289839	0.220712	0.441606	0.958053	2.5	4	-2.57624
CCCCN(CCCC)c1oc2ccc(-c3ccc(N(c4ccccc4)c4ccccc4)cc3)cc2c(=O)c1O	2.699	-7.0204	4.69712	99.9469	0.864363	0.101704	4.133	0.513774	2	0.66648	0.672905	0.186158	0.987813	2	4	3.142
CCN(CC)c1cc(=O)oc2c(-c3nc4ccccc4o3)c(O)ccc12	2.704	-5.36968	3.65368	98.4108	-0.222169	1.25217	3.18003	0.492768	2	0.0878179	0.875588	0.641032	0.500624	2	4	5.14975
N#CC(C#N)=Cc1ccc(-c2ccc3c(c2)C(=O)c2cccc(O)c2C3=O)cc1O	2.705	-7.21388	3.60072	98.2833	-0.358627	1.16031	2.09494	1.14223	2.5	0.119673	0.997032	0.971505	0.684907	1.5	4	2.57783
CC(C)(C)c1ccc(O)c(-c2ccc3nc(-c4ccc(-c5ccc6c(c5)C(=O)c5cccc(O)c5C6=O)cc4)oc3c2)c1	2.734	-8.65742	3.16457	98.6721	0.732447	0.839029	0.899628	1.39532	2.5	0.452111	0.996883	0.836306	0.0994186	1.5	4	-2.0327
CCN(CC)c1ccc(-c2ccc3oc(NC(F)(F)F)c(O)c(=O)c3c2)cc1	2.741	-5.45976	3.89257	98.5928	0.180499	0.859496	7.03593	0.802675	1.5	0.165817	0.95898	0.648793	0.0867337	2.5	4	1.30637
CCN(CC)c1ccc(-c2cc3cc(-c4nc5cc(-c6ccc(C(F)(F)F)cc6)ccc5o4)c(O)cc3o2)cc1	2.747	-7.25991	3.68858	97.9705	0.8125	0.90972	4.33747	0.670891	2	0.355583	0.974197	0.348086	0.0907933	2	4	5.5814
CCN(CC)c1ccc(-c2ccc(-c3nc4ccc(-c5ccc(-c6cc(C(C)(C)C)ccc6O)cc5)cc4o3)c(O)c2)cc1	2.751	-7.93001	3.93749	98.4521	0.285507	0.669995	3.92527	0.526354	2	0.674713	0.978737	0.571256	0.0246867	2	4	7.61261
Cc1cc(-c2ccc(-c3cc4cc(-c5nc6cc(-c7cccc(O)c7)ccc6o5)c(O)cc4o3)cc2)cc(C)c1C	2.754	-8.31813	4.06898	98.3439	0.527858	1.1143	2.89946	0.99993	2	0.560717	0.989308	0.591115	0.167192	2	4	2.93455
COc1ccc(OC)c(-c2ccc3c(c2)C(=O)c2cc(C(=O)c4ccc5cccc(O)c5c4O)cc(O)c2C3=O)c1	2.758	-8.67985	4.10849	98.2341	0.186631	0.888362	0.5143	1.53367	2.5	0.432403	0.99983	0.990036	0.134553	1.5	4	3.92653
Cc1cc(-c2ccc(-c3oc4ccc(-c5ccc(-c6nc7cc(-c8ccccc8)ccc7o6)cc5)cc4c(=O)c3O)cc2)cc(C)c1C	2.763	-8.3643	4.01425	98.6553	0.677786	0.546848	1.9961	1.1469	2.5	0.802656	0.999142	0.682217	0.0115906	1.5	4	-0.69355
COc1ccc(-c2cccc(O)c2)cc1-c1nc2sc(-c3cc(C(C)(C)C)ccc3O)nc2s1	2.764	-7.01361	3.18394	98.35	0.198767	1.36612	4.17584	1.05763	2.5	0.336118	0.981254	0.377172	0.484589	1.5	4	-7.87883
N#Cc1cc(=O)oc2c(-c3ccc4c(c3)C(=O)c3cccc(O)c3C4=O)c(O)ccc12	2.765	-6.77716	3.19487	97.3304	0.096175	2.71669	1.65524	1.40144	2.5	0.191256	0.99452	0.934172	0.534334	1.5	4	1.706
COc1ccc(C(C)(C)C)cc1-c1nc2sc(-c3cc(-c4ccccc4O)ccc3O)nc2s1	2.766	-7.59751	3.3749	98.6936	0.231733	1.00793	4.36241	0.9907	2	0.204827	0.972144	0.345481	0.62234	2	4	-1.53935
CCN(CC)c1ccc(-c2cc3cc(-c4nc5cc(-c6nc7ccccc7o6)ccc5o4)c(O)cc3o2)cc1	2.771	-7.26477	4.70749	98.3279	0.485189	1.08607	2.32326	0.831942	2	0.111241	0.991829	0.604213	0.473883	2	4	-2.33321
O=c1ccc2ccc(O)c(-c3n[nH]c4c3ccc3cccnc34)c2o1	2.774	-4.34579	2.76806	98.2996	-0.134523	1.30329	3.12621	0.856445	2	0.12687	0.987369	0.865495	0.297636	2	4	-3.6092
CCN(CC)c1ccc(-c2cc(O)c3c(c2)C(=O)c2cc(-c4nc5cc(C(F)(F)F)ccc5o4)ccc2C3=O)cc1	2.779	-8.57024	3.92733	98.4606	1.01503	0.828929	2.92797	1.06594	2.5	0.306083	0.998012	0.825975	0.157791	1.5	4	5.90894
CCN(CC)c1ccc(-c2cc3cc(-c4nc5ccc(-c6nc7ccccc7o6)cc5o4)c(O)cc3o2)cc1	2.783	-7.1885	4.67801	98.3669	0.420983	1.06464	2.37856	0.799423	2	0.108606	0.989616	0.610322	0.539924	2	4	-1.49066
COc1ccc(C(C)(C)C)cc1-c1nc2sc(-c3cc(C(C)(C)C)ccc3O)nc2s1	2.785	-8.12667	3.74527	98.324	0.359635	1.30842	5.68336	0.837089	1.5	0.208813	0.970405	0.135086	0.637809	2.5	4	-7.50527
CCN(CC)c1oc2ccc(-c3ccc(NC(F)(F)F)cc3)cc2c(=O)c1O	2.786	-5.37844	3.76629	99.089	0.0065087	0.543918	7.6613	0.780472	1.5	0.440804	0.93046	0.297982	0.0164082	2.5	4	-5.07179
Cc1ccc(-c2ccc(C#N)cc2-c2nc3sc(-c4cc(C(C)(C)C)ccc4O)nc3s2)cc1	2.786	-8.33847	3.65384	99.117	0.510818	0.634425	3.881	1.09905	2.5	0.615063	0.984855	0.295471	0.743719	1.5	4	-1.88578
CCCCN(CCCC)c1ccc(-c2cc3cc(-c4nc5cc(C(C)(C)C)ccc5o4)c(O)cc3o2)cc1	2.789	-8.88358	5.74726	99.0706	0.506276	0.454452	4.35786	0.549893	2	0.685494	0.850285	0.154934	0.691151	2	4	3.75723
COc1cc(C(C)(C)C)ccc1-c1nc2sc(-c3cc(C(C)(C)C)ccc3O)nc2s1	2.791	-8.18506	3.79441	98.5963	0.383823	1.02204	5.75521	0.820796	1.5	0.197407	0.967299	0.138773	0.660271	2.5	4	-6.98977
CCN(CC)c1ccc(-c2cc3cc(-c4nc5cc(-c6cc(C)c(C)c(C)c6)ccc5o4)c(O)cc3o2)cc1	2.791	-8.24104	4.27523	98.497	0.532263	0.873783	4.38011	0.56393	2	0.257917	0.986663	0.687435	0.368125	2	4	4.54523
Cc1ccc(-c2ccc(C(C)(C)C)cc2-c2nc3sc(-c4cc(C(C)(C)C)ccc4O)nc3s2)cc1	2.791	-10.0222	4.58253	99.0141	0.484865	0.647927	4.60496	0.800933	2	0.386806	0.976426	0.123036	0.530722	2	4	-4.66939
COc1ccc(C(C)(C)C)cc1-c1nc2sc(-c3cc(C(F)(F)F)ccc3O)nc2s1	2.793	-7.53732	3.89469	99.2036	0.347691	0.613065	5.15939	0.997776	1.5	0.235902	0.964992	0.108166	0.398685	2.5	4	-7.14128
COc1cc(C(C)(C)C)ccc1-c1nc2sc(-c3cc(C(F)(F)F)ccc3O)nc2s1	2.799	-7.57167	3.95205	99.4207	0.363006	0.479892	5.26835	0.99063	1.5	0.223435	0.961161	0.111237	0.422952	2.5	4	-6.36307
Cc1ccc(-c2ccc(N(C)C)cc2-c2nc3sc(-c4cc(C(F)(F)F)ccc4O)nc3s2)cc1	2.803	-7.16953	3.9374	99.2399	0.413589	0.501247	4.27372	0.978972	2	0.280278	0.984566	0.371526	0.411089	2	4	4.88417
COc1ccc(-c2ccc3c(c2)C(=O)c2cccc(O)c2C3=O)cc1-c1ncc(-c2cc(C(C)(C)C)ccc2O)o1	2.803	-6.4319	3.71919	98.4854	0.642169	1.2046	2.09604	1.20883	2.5	0.412087	0.993919	0.843417	0.0573762	1.5	4	5.09158
O=c1c(O)coc2ccc(-c3oc4ccc(-c5ccc(N(c6ccccc6)c6ccccc6)cc5)cc4c(=O)c3O)cc12	2.805	-6.02823	3.70934	98.6964	0.114953	0.393447	2.7682	0.874266	2	0.239373	0.993254	0.395324	0.484166	2	4	6.80867
CCN(CC)c1ccc(-c2cc(O)c3c(c2)C(=O)c2cc(-c4nc5ccc(-c6ccccc6O)cc5o4)ccc2C3=O)cc1	2.828	-8.7778	3.79671	98.3356	0.650072	1.13529	1.33669	1.11522	2.5	0.215384	0.997857	0.961303	0.420165	1.5	4	5.49165
COc1ccc(C(C)(C)C)cc1-c1nc2sc(-c3cc(-c4nc5ccccc5s4)ccc3O)nc2s1	2.83	-8.38029	3.7032	98.8038	0.513968	0.931825	4.16343	0.946446	2	0.251097	0.997629	0.450504	0.515403	2	4	-3.88224
CCN(CC)c1ccc(-c2ccc3c(c2)C(=O)c2cc(N(c4ccccc4)C(C)(C)C)cc(O)c2C3=O)cc1	2.837	-9.01439	5.01406	99.1552	0.758024	0.496486	4.24337	0.480021	2	0.228085	0.996894	0.949733	0.19231	2	4	4.12744
CCN(CC)c1ccc(-c2ccc3c(c2)C(=O)c2cc(-c4ccc(-c5ccc6cccc(O)c6c5O)cc4)cc(O)c2C3=O)cc1	2.856	-8.69548	3.98595	98.1331	0.822287	0.891565	0.297315	1.32113	2.5	0.498918	0.999773	0.993547	0.0633889	1.5	4	4.76696
CCCCN(CCCC)c1oc2ccc(-c3ccc(NC(F)(F)F)cc3)cc2c(=O)c1O	2.857	-6.27135	4.34779	99.3511	0.352649	0.201515	6.05587	0.522212	1.5	0.828692	0.580103	0.180615	0.234135	2.5	4	-4.27209
CCCCN(CCCC)c1ccc(-c2cc3cc(-c4nc5cc(-c6ccc(C(F)(F)F)cc6)ccc5o4)c(O)cc3o2)cc1	2.877	-8.78831	4.88001	99.5171	0.936539	0.218367	3.4874	0.782269	2	0.89158	0.929479	0.163703	0.151169	2	4	6.53894
CCCCN(CCCC)c1oc2ccc(-c3ccc(-c4nc5cc(C(F)(F)F)ccc5o4)cc3)cc2c(=O)c1O	2.887	-7.0102	4.27099	99.8024	0.815233	0.146308	3.51666	1.04937	2.5	0.765939	0.824776	0.1026	0.383649	1.5	4	7.29608
CCN(CC)c1ccc(-c2nc3sc(-c4cc(-c5cc(C(C)(C)C)ccc5O)ccc4O)nc3s2)cc1	2.892	-8.0997	3.17167	98.7465	0.242982	0.850558	4.08024	0.923725	2	0.172182	0.986739	0.557163	0.54135	2	4	-3.61232
COc1ccc(OC)c(-c2nc3sc(-c4cc(-c5ccc6cccc(O)c6c5O)ccc4O)nc3s2)c1	2.901	-6.0743	3.28967	98.3603	0.143484	1.1545	0.759609	1.60274	2.5	0.194593	0.998768	0.859462	0.490897	1.5	4	0.0550588
CCN(CC)c1ccc(-c2cc3cc(-c4nc5ccc(-c6nc7ccc(-c8ccccc8)cc7o6)cc5o4)c(O)cc3o2)cc1	2.905	-8.74579	4.95781	98.6861	0.658552	0.724781	1.79563	0.941586	2	0.234857	0.995502	0.635692	0.37107	2	4	1.75616
CCN(CC)c1ccc(-c2cc3cc(-c4nc5cc(-c6ccc(-c7cccc(O)c7)c(O)c6)ccc5o4)c(O)cc3o2)cc1	2.921	-6.69642	3.64382	98.0937	0.218342	1.24463	2.01912	1.15509	2.5	0.342608	0.981601	0.734409	0.264804	1.5	4	2.47247
N#CC(C#N)=Cc1ccc(-c2cc3cc(-c4nc5cc(C(F)(F)F)ccc5o4)c(O)cc3o2)cc1	2.934	-6.82182	3.94458	99.5439	-0.140012	0.31678	3.10915	1.00567	2.5	0.119676	0.987388	0.384663	0.829087	1.5	4	0.405607
CNc1ccc(-c2nc3ccccc3o2)cc1-c1nc2sc(-c3cc(C(C)(C)C)ccc3O)nc2s1	2.935	-7.76314	3.71186	98.2513	0.469835	1.39865	3.3523	1.00877	2.5	0.140812	0.997975	0.333431	0.811077	1.5	4	0.13913
COc1ccc(-c2ccc(-c3nc4ccc(-c5nc6sc(-c7cc(-c8ccccc8)ccc7O)nc6s5)cc4o3)c(O)c2)cc1	2.939	-9.79413	5.14075	99.1412	0.649462	0.627113	2.39173	1.00521	2.5	0.60183	0.99975	0.721513	0.256912	1.5	4	2.76284
CCN(CC)c1ccc(-c2ccc(-c3nc4ccc(-c5nc6ccc(-c7ccc(-c8ccccc8)cc7O)cc6o5)cc4o3)c(O)c2)cc1	2.94	-8.16469	4.54562	98.4456	0.47704	0.703626	1.22944	1.062	2.5	0.630607	0.996619	0.746641	0.0716802	1.5	4	7.45072
CCN(CC)c1ccc2cc(-c3cc4cc(-c5nc6cc(C(C)(C)C)ccc6o5)c(O)cc4o3)oc2c1	2.945	-8.72089	4.99182	98.8617	0.386459	0.666526	4.22858	0.633422	2	0.148942	0.934043	0.390151	0.554821	2	4	7.84428
CCN(CC)c1ccc(-c2ccc3c(c2)C(=O)c2cc(-c4ccc(-c5cc6cc(-c7ccccc7)c(O)cc6o5)cc4)cc(O)c2C3=O)cc1	2.95	-10.4229	4.44186	98.5748	0.951057	0.624206	0.720979	1.18936	2.5	0.61307	0.999787	0.984733	0.0564845	1.5	4	1.40034
CCN(CC)c1ccc2cc(-c3cc4cc(-c5nc6cc(C(F)(F)F)ccc6o5)c(O)cc4o3)oc2c1	2.952	-6.58371	4.21312	98.3654	0.694639	0.913394	4.09871	0.724598	2	0.166472	0.921093	0.332101	0.300481	2	4	4.0771
CCN(CC)c1ccc(-c2cc(O)c3c(c2)C(=O)c2cc(-c4nc5cc(-c6ccc(-c7ccccc7)c(O)c6)ccc5o4)ccc2C3=O)cc1	2.955	-10.1601	4.10184	98.4886	0.920138	0.815103	0.774328	1.29089	2.5	0.602857	0.999705	0.971299	0.0996147	1.5	4	3.97598
CC(C)(C)c1ccc(O)c(-c2nc3sc(-c4cc(C(C)(C)C)ccc4C#N)nc3s2)c1	2.958	-8.11006	3.61843	98.6099	0.179018	1.04857	4.95372	1.02941	2.5	0.305411	0.978677	0.118581	0.770106	1.5	4	-8.01705
CCN(CC)c1ccc(-c2cc(O)c3c(c2)C(=O)c2cc(-c4nc5ccc(-c6cc(-c7ccccc7)ccc6O)cc5o4)ccc2C3=O)cc1	2.96	-10.1668	4.15095	98.6371	0.808022	0.79905	2.17981	1.11705	2.5	0.614613	0.999642	0.972111	0.133635	1.5	4	4.29635
CCN(CC)c1ccc(-c2cc(O)c3c(c2)C(=O)c2cc(-c4nc5ccc(-c6ccc(-c7ccccc7)c(O)c6)cc5o4)ccc2C3=O)cc1	2.965	-10.2121	4.08736	98.5184	0.853903	0.792801	0.86394	1.22578	2.5	0.605884	0.999705	0.973226	0.138594	1.5	4	3.84878
CC(C)(C)c1ccc(O)c(-c2nc3sc(-c4cc(C#N)ccc4C#N)nc3s2)c1	2.981	-6.5953	3.30281	98.6555	0.156542	1.01895	4.48054	1.1696	2.5	0.511704	0.985659	0.287707	0.875492	1.5	4	-5.13827
N#CC=Cc1n[nH]c2c1ccc1cccnc12	2.982	-2.50821	2.35977	98.295	-0.231153	1.60418	4.96433	0.970635	2	0.202922	0.96793	0.826008	0.191506	2	4	-9.1781
CCN(CC)c1ccc(-c2ccc3c(c2)C(=O)c2cc(OC=C(C#N)C#N)cc(O)c2C3=O)cc1	2.986	-7.98077	4.03168	98.1463	-0.101131	1.04941	3.32516	0.886265	2	0.175366	0.99989	0.984325	0.229501	2	4	5.36747
COc1ccc(C(C)(C)C)cc1-c1nc2sc(C(=O)c3ccc4cccc(O)c4c3O)nc2s1	2.998	-6.80493	3.41933	98.5235	0.218043	1.33904	1.23403	1.49225	2.5	0.0958911	0.998754	0.658943	0.866936	1.5	4	-0.31694
N#CC(C#N)=Cc1ccc(-c2ccc3c(c2)C(=O)c2cc(-c4nc5cc(C(F)(F)F)ccc5o4)cc(O)c2C3=O)cc1	2.999	-8.59555	4.34344	99.6685	0.128211	0.262826	2.65469	1.06168	2.5	0.292056	0.999708	0.89814	0.616069	1.5	4	0.416487
CCN(CC)c1ccc(-c2cc3cc(-c4nc5cc(-c6ccc(-c7nc8ccccc8o7)c(O)c6)ccc5o4)c(O)cc3o2)cc1	3.011	-8.0485	4.53965	98.4056	0.458639	0.838089	1.6852	0.814788	2	0.218431	0.996095	0.646325	0.305827	2	4	5.34379
CCN(CC)c1ccc(-c2cc3cc(-c4nc5cc(-c6ccc(-c7nc8ccccc8s7)c(O)c6)ccc5o4)c(O)cc3o2)cc1	3.011	-8.39156	4.11832	98.744	0.618461	0.734418	1.67634	0.789265	2	0.268866	0.997476	0.789314	0.228512	2	4	4.02833
Cc1cc(-c2ccc(-c3oc4ccc(-c5nc6cc(C=C(C#N)C#N)ccc6o5)cc4c(=O)c3O)cc2)cc(C)c1C	3.013	-7.03632	3.32344	99.1467	-0.319454	0.439251	2.60337	1.15542	2.5	0.207266	0.999215	0.822757	0.383962	1.5	4	3.94843
COc1ccc(-c2ccc(-c3nc4ccc(-c5nc6sc(-c7cc(C(C)(C)C)ccc7O)nc6s5)cc4o3)c(O)c2)cc1	3.022	-8.97744	3.56721	98.9942	0.345221	0.640067	2.54065	1.15272	2.5	0.371308	0.999198	0.415512	0.416541	1.5	4	2.41601
CCN(CC)c1ccc(-c2cc3cc(-c4nc5cc(-c6nc7cc(N(CC)CC)ccc7o6)ccc5o4)c(O)cc3o2)cc1	3.026	-7.75481	4.68435	98.2196	0.55665	1.09684	1.57345	1.01013	2.5	0.0809446	0.991523	0.717277	0.568732	1.5	4	5.49523
CCCCN(CCCC)c1oc2ccc(C=C(C#N)C#N)cc2c(=O)c1O	3.048	-5.75678	4.03199	99.2553	-0.380219	0.340692	4.34602	0.830122	2	0.21721	0.672293	0.627477	0.989527	2	4	-3.54115
CCN(CC)c1ccc(C(C)(C)C)cc1-c1nc2sc(-c3cc(-c4nc5ccccc5s4)ccc3O)nc2s1	3.057	-9.08658	3.84933	99.3204	0.527055	0.531478	4.09129	0.793718	2	0.211055	0.99728	0.541856	0.65962	2	4	3.01823
N#CC(C#N)=Cc1cc(=O)oc2c(-c3ccc4c(c3)C(=O)c3cccc(O)c3C4=O)c(O)ccc12	3.082	-6.75115	3.20644	98.001	-0.416807	1.34603	1.38716	1.15389	2.5	0.0508284	0.999026	0.981161	0.616277	1.5	4	1.28758
O=C1c2cc(-c3ccc(N(c4ncco4)c4nc5ccc(-c6ccccc6O)cc5o4)cc3)ccc2C(=O)c2c(O)cccc21	3.144	-9.0816	4.45271	97.0524	0.745952	2.69523	0.198708	1.13208	2.5	0.519956	0.999381	0.96784	0.0462612	1.5	4	4.24199
CCN(CC)c1ccc(-c2cc(O)c3c(c2)C(=O)c2cc(-c4cc5cc(C=C(C#N)C#N)c(O)cc5o4)ccc2C3=O)cc1	3.193	-8.60592	3.97791	98.7543	-0.0485494	0.70627	1.3973	1.19824	2.5	0.0893878	0.999823	0.983591	0.505193	1.5	4	9.4193
CC(C)(C)c1ccc(O)c(-c2nc3sc(-c4cc(-c5nc6scnc6s5)ccc4-c4ccccc4)nc3s2)c1	3.195	-9.11679	3.63808	99.2015	0.75435	0.720594	3.01221	0.999873	2	0.261676	0.999919	0.496485	0.680543	2	4	0.872529
CCN(CC)c1ccc(-c2cc(O)c3c(c2)C(=O)c2cc(Oc4ccc(-c5nc6ccc(-c7nc8ccccc8o7)cc6o5)c(O)c4)ccc2C3=O)cc1	3.206	-9.72644	4.15729	98.5504	0.935108	0.962868	0.741041	1.14826	2.5	0.446158	0.999918	0.976291	0.184052	1.5	4	4.37248
CCN(CC)c1ccc(C(C)(C)C)cc1-c1nc2sc(-c3cc(-c4ccc5cccc(O)c5c4O)ccc3O)nc2s1	3.227	-8.13062	3.32642	99.3451	0.292194	0.506797	0.764113	1.57479	2.5	0.155818	0.996336	0.656669	0.765159	1.5	4	6.85126
Cc1ccc(-c2ccc(-c3nc4scnc4s3)cc2-c2nc3sc(-c4cc(C(C)(C)C)ccc4O)nc3s2)cc1	3.231	-9.40961	3.76251	99.4247	0.716329	0.560715	2.30981	1.1785	2.5	0.288527	0.999915	0.487392	0.724448	1.5	4	0.296724
COc1ccc(-c2nc3scnc3s2)cc1-c1nc2sc(-c3cc(C(C)(C)C)ccc3O)nc2s1	3.244	-7.10478	3.32598	98.7344	0.566329	1.08665	3.49275	1.06533	2.5	0.144814	0.999846	0.511414	0.7608	1.5	4	0.348879
COc1ccc(C2=Nc3ccc4ccccc4c3C2(C)C)c(-c2nc3sc(-c4cc(C(F)(F)F)ccc4O)nc3s2)c1	3.28	-8.58704	4.61822	99.2483	0.66649	0.470532	3.28707	1.05588	2.5	0.420584	0.998949	0.641713	0.453407	1.5	4	-0.736936
CC(C)(C)c1ccc(O)c(-c2nc3sc(-c4cc(C(C)(C)C)ccc4C=C(C#N)C#N)nc3s2)c1	3.284	-8.42941	3.89202	98.9936	-0.204432	0.57852	3.78721	1.09664	2.5	0.116183	0.996264	0.304584	0.789825	1.5	4	-7.60403
CC(C)(C)c1ccc(O)c(-c2nc3sc(-c4cc(C#N)ccc4C=C(C#N)C#N)nc3s2)c1	3.304	-7.22116	3.44451	98.8092	-0.292964	0.692631	3.47205	1.14001	2.5	0.235209	0.997367	0.574145	0.909008	1.5	4	-3.31886
CCN(CC)c1ccc(-c2ccc3c(c2)C(=O)c2cccc(O)c2C3=O)cc1-c1nc2ccc(-c3cc(-c4cc(C(C)(C)C)ccc4O)ccc3O)cc2o1	3.313	-8.64615	3.59365	98.9757	0.6599	0.640848	1.12313	1.41399	2.5	0.640942	0.997335	0.910338	0.076241	1.5	4	9.94244
CC(C)(C)c1ccc(C2=Nc3c(ccc4ccccc34)C2(C)C)c(-c2nc3sc(-c4cc(C(F)(F)F)ccc4O)nc3s2)c1	3.374	-9.97302	4.84757	100.106	0.715185	0.213736	3.7691	0.98055	2	0.485112	0.994914	0.185171	0.440051	2	4	-0.165211
CCN(CC)c1ccc(-c2ccc3c(c2)C(=O)c2cc(-c4nc5ccc(-c6ccc(-c7ccc(-c8nc9ccccc9o8)c(O)c7)c(O)c6)cc5o4)cc(O)c2C3=O)cc1	3.423	-10.594	4.64115	98.5547	0.711918	0.817177	0.532757	1.19737	2.5	0.663565	0.999967	0.974627	0.0499615	1.5	4	5.1332
CC(C)(C)c1ccc(O)c(-c2nc3sc(-c4cc(-c5ccc[nH]5)ccc4C4=Nc5c(ccc6ccccc56)C4(C)C)nc3s2)c1	3.49	-9.28904	4.27216	99.5009	0.571463	0.384931	3.87358	0.726693	2	0.573518	0.999367	0.682204	0.232106	2	4	-1.754
CC(C)(C)c1ccc(O)c(-c2ccc(O)c(-c3nc4sc(-c5cc(-c6ccc[nH]6)ccc5C5=Nc6ccc7ccccc7c6C5(C)C)nc4s3)c2)c1	3.655	-9.23411	3.58299	99.3111	0.621409	0.47261	2.10071	1.19328	2.5	0.653449	0.999637	0.784998	0.157014	1.5	4	-10.7013
O=C(Nc1ccc(C(F)(F)F)cc1)c1ccccc1	1.43	-4.7115	3.66534	98.3568	-0.00316148	1.11783	5.44928	0.872549	1.5	0.600953	0.898437	0.295563	0.579812	2	3.5	-9.07611
O=C(Nc1ccccc1C(F)(F)F)c1ccccc1O	1.719	-4.91912	3.333	98.8969	-0.525542	0.727484	5.70538	0.66459	1.5	0.265675	0.693924	0.363406	0.854442	2	3.5	-5.96712
O=C(Nc1ccc(Cl)cc1C(F)(F)F)c1ccccc1O	1.842	-5.52995	3.64365	99.156	-0.508432	0.428446	4.8566	0.671833	2	0.395064	0.825446	0.238111	0.847408	1.5	3.5	-6.34245
CC(C)(C)C(=O)Nc1ccccc1-c1ccccn1	1.876	-3.21943	2.60098	93.4772	0.136363	5.4475	6.86429	0.511106	2	0.210182	0.738887	0.507509	0.800653	1.5	3.5	-6.31574
O=C(Nc1ccc(-c2oc3ccccc3c(=O)c2O)cc1)c1ccccc1	1.887	-4.63103	2.85993	98.4591	-0.633308	0.929628	1.779	1.01403	2.5	0.437918	0.990454	0.708128	0.674728	1	3.5	-5.37885
O=C1c2cc(-c3ccccc3)ccc2C(=O)c2c(O)cccc21	1.892	-7.06715	4.02703	97.77	0.435233	1.26488	4.19701	0.823201	2	0.240752	0.967441	0.937266	0.450309	1.5	3.5	-1.6923
O=C(Nc1ccccc1)c1ccc2nc(-c3ccccc3O)oc2c1	1.919	-4.72807	3.57022	98.5355	-0.496235	0.784257	2.36411	0.788801	2	0.289509	0.949082	0.546765	0.910766	1.5	3.5	-3.27523
COc1ccc(-c2ccc3c(c2)C(=O)c2cccc(O)c2C3=O)cc1	1.955	-7.13161	3.76406	97.2837	0.422294	2.01353	4.50504	0.703771	2	0.335202	0.986577	0.954786	0.261472	1.5	3.5	5.40256
O=c1c(O)c(-c2ccc(-c3ccc(-c4ccccc4)cc3)cc2)oc2ccccc12	1.959	-6.0406	3.66856	97.5701	0.0124251	0.814712	3.9687	0.774858	2	0.622964	0.979708	0.750295	0.031192	1.5	3.5	-5.75755
CC(=O)Nc1cccc2ccc3cccnc3c12	1.97	-3.31313	2.36947	96.9707	-0.129699	4.68253	3.01212	0.644874	2	0.119095	0.973882	0.868394	0.666746	1.5	3.5	-8.15371
O=C1c2cc(-c3ccc(-c4ccccc4)cc3)ccc2C(=O)c2c(O)cccc21	1.979	-8.3728	4.31866	98.0095	0.598905	0.782373	3.2422	0.77888	2	0.541712	0.993319	0.959461	0.093352	1.5	3.5	0.788266
COc1cc(Cl)ccc1NC(=O)c1nc2ccccc2o1	1.979	-4.79674	3.54682	98.5861	-0.331784	0.812411	4.77269	0.634289	2	0.455117	0.960412	0.561103	0.436398	1.5	3.5	-6.52326
COc1ccc(C#N)cc1-c1ccc(C(=O)c2ccccc2)c(O)c1	1.981	-5.49292	3.66677	97.4186	0.0578002	2.44153	6.35528	1.10989	2	0.716791	0.886852	0.57734	0.261788	1.5	3.5	-4.58348
O=C(Nc1ccccc1C(F)(F)F)c1nc2ccccc2s1	1.984	-4.72514	3.44458	98.5147	0.236802	0.846707	5.38469	0.637382	1.5	0.253764	0.929936	0.66589	0.661257	2	3.5	-7.90333
N#Cc1ccc(NC(=O)c2nc3ccccc3o2)cc1	2	-3.93147	2.82732	95.7866	0.0449593	3.92071	2.54715	1.21299	2.5	0.680145	0.954471	0.711568	0.525793	1	3.5	-6.72123
O=C(Nc1ccc(C(F)(F)F)cc1)c1nc2ccccc2o1	2.001	-5.1081	3.87684	97.1436	0.281216	2.34002	5.82167	0.564714	1.5	0.439295	0.892142	0.388985	0.169127	2	3.5	-5.15323
COc1cccc(-c2ccc3c(c2)C(=O)c2cccc(O)c2C3=O)c1	2.004	-6.82013	3.80332	97.939	0.510155	1.59813	4.44332	0.668655	2	0.328913	0.985784	0.954513	0.272448	1.5	3.5	-1.04231
Cc1ccc(-c2ccc(-c3ccc(-c4oc5ccccc5c(=O)c4O)cc3)cc2)cc1	2.015	-5.92534	3.21276	98.0234	0.133612	0.527017	3.62619	0.721281	2	0.659146	0.978289	0.738749	0.0400377	1.5	3.5	-3.31741
O=C1c2cc(-c3ccccc3-c3ccccc3)ccc2C(=O)c2c(O)cccc21	2.018	-7.84013	4.3674	97.9484	0.452908	0.675571	3.01056	0.720672	2	0.403441	0.979788	0.943609	0.279887	1.5	3.5	-1.32851
O=c1c(O)c(-c2ccc(Cl)cc2-c2ccccc2)oc2ccccc12	2.033	-4.49008	3.21737	99.2435	-0.571447	0.210877	4.16806	0.732038	2	0.316303	0.917923	0.358599	0.512892	1.5	3.5	-4.67222
Cc1ccc(-c2ccc(-c3ccc4c(c3)C(=O)c3cccc(O)c3C4=O)cc2)cc1	2.034	-8.65249	4.15079	98.2859	0.67701	0.634481	2.81085	0.74321	2	0.580441	0.992845	0.957033	0.117684	1.5	3.5	2.05328
O=C(Nc1ccccc1-c1ccccn1)c1cccc(-c2nc3ccccc3o2)c1	2.035	-5.42352	3.80544	97.9471	-0.0648529	1.22547	2.91817	0.804571	2	0.609311	0.991061	0.654857	0.692495	1.5	3.5	-7.97532
COc1ccc(-c2ccc(-c3ccc4c(c3)C(=O)c3cccc(O)c3C4=O)cc2)cc1	2.05	-8.69261	4.20555	97.654	0.609252	1.22149	3.72495	0.690718	2	0.644705	0.997015	0.969589	0.0461167	1.5	3.5	3.12242
O=c1c(O)c(-c2ccccc2O)oc2ccccc12	2.055	-2.95438	2.10729	98.6865	-0.756251	0.815781	7.76482	0.936841	1.5	0.0615961	0.708676	0.548477	0.607653	2	3.5	-3.06111
Nc1ccc(-c2oc3ccc(-c4ccccc4)cc3c(=O)c2O)cc1	2.055	-4.25343	2.66094	98.1842	-0.280378	0.887457	5.06614	1.12191	2	0.150071	0.913722	0.884113	0.360489	1.5	3.5	-4.6667
Nc1ccc(-c2ccc3c(c2)C(=O)c2cccc(O)c2C3=O)cc1	2.059	-7.34708	3.4725	96.0217	0.531565	4.93667	3.92064	0.961855	2	0.189536	0.981536	0.98866	0.369009	1.5	3.5	1.44704
O=CNc1ccccc1-c1nc2ccccc2s1	2.059	-4.37848	3.31551	97.9726	0.102125	1.46863	4.70568	0.49854	2	0.0888793	0.964856	0.778066	0.516293	1.5	3.5	-10.2379
N#Cc1ccccc1NC(=O)c1nc2ccccc2o1	2.061	-3.48403	2.52436	96.7269	-0.0177492	2.56792	3.36469	0.850393	2	0.396467	0.926521	0.649175	0.653497	1.5	3.5	-6.98587
CN(C)c1ccc(-c2ccc(-c3oc4ccccc4c(=O)c3O)cc2)cc1	2.066	-4.69354	2.92584	98.5391	-0.206091	0.614991	5.35705	0.623512	1.5	0.277029	0.948376	0.803548	0.121783	2	3.5	1.34325
O=c1c(O)c(-c2ccccc2)oc2ccc(-c3ccc(Nc4ccccc4)cc3)cc12	2.066	-5.63169	3.06619	98.7423	-0.236547	0.36655	3.57526	0.762271	2	0.691669	0.99723	0.615913	0.502887	1.5	3.5	-6.33197
CC(C)(C)c1ccc(-c2ccc(-c3oc4ccccc4c(=O)c3O)cc2)cc1	2.069	-5.17449	3.86277	98.7015	0.0339921	0.510209	5.58778	0.609144	1.5	0.447413	0.925296	0.402728	0.105021	2	3.5	-5.49242
Nc1ccc(-c2cc(O)c3c(c2)C(=O)c2ccccc2C3=O)cc1	2.072	-7.41703	3.59199	94.7032	0.563532	6.37084	4.93577	0.862583	2.5	0.15515	0.977603	0.978994	0.715476	1	3.5	1.32196
O=CNc1ccccc1-c1nc2ccccc2[nH]1	2.081	-3.52611	2.58747	97.9811	-0.1996	2.56806	4.77606	0.956154	2	0.149499	0.944384	0.828805	0.48478	1.5	3.5	-10.1223
O=C(Nc1ccc(Cl)cc1C(F)(F)F)c1nc2ccccc2s1	2.092	-5.53861	3.91001	99.3029	0.0153797	0.422432	4.63402	0.72038	2	0.387485	0.964031	0.520409	0.639045	1.5	3.5	-7.28137
CNc1ccc(-c2ccc3c(c2)C(=O)c2cccc(O)c2C3=O)cc1	2.093	-7.44987	3.66303	97.8807	0.449127	1.75886	4.54123	0.697773	2	0.271873	0.990855	0.96898	0.323241	1.5	3.5	2.31112
NCc1ccc2c(c1)C(=O)c1cccc(O)c1C2=O	2.093	-3.11425	2.40193	91.9086	0.60042	10.4881	4.65	0.882175	2.5	0.171674	0.704951	0.87017	0.973815	1	3.5	-1.19096
O=c1c(O)c(-c2ccc(-c3ccc(C(F)(F)F)cc3)cc2)oc2ccccc12	2.094	-4.89741	3.38272	97.1905	0.257739	1.2071	5.93713	0.854404	1.5	0.459841	0.906956	0.318963	0.0483135	2	3.5	-8.07616
O=C1c2cc([N+](=O)[O-])ccc2C(=O)c2c(O)cccc21	2.094	-5.63544	3.0087	95.8703	0.374499	5.8731	4.11896	0.961558	2.5	0.115837	0.996792	0.987798	0.969972	1	3.5	-1.05251
CN(C)c1ccc(-c2ccc(-c3nc4ccccc4s3)c(O)c2)cc1	2.096	-5.38274	3.3873	98.7527	0.157689	0.91599	6.22297	0.355623	1.5	0.299852	0.934902	0.824804	0.219286	2	3.5	2.87716
O=C(Nc1ccc(Cl)cc1-c1oc2ccccc2c(=O)c1O)c1ccccc1	2.1	-5.75518	2.79505	99.1505	-0.713759	0.349962	2.0282	1.02914	2.5	0.578462	0.99526	0.43229	0.8532	1	3.5	-2.4954
CN(C)c1ccc(-c2ccc3oc(-c4ccccc4)c(O)c(=O)c3c2)cc1	2.104	-4.66766	3.00971	98.6949	-0.230642	0.417262	5.85281	0.66141	1.5	0.222492	0.967797	0.725113	0.184132	2	3.5	3.55161
CN(C)c1ccc(-c2ccc3c(c2)C(=O)c2cccc(O)c2C3=O)cc1	2.105	-7.45919	3.79707	98.1189	0.465662	1.22092	4.64851	0.637874	2	0.215433	0.982359	0.969648	0.308507	1.5	3.5	6.492
Oc1ccc(-c2ccc(C(F)(F)F)cc2)cc1-c1nc2ccccc2s1	2.11	-6.73578	3.92131	98.4371	0.597929	0.58417	7.21246	0.579357	1.5	0.501633	0.836315	0.309916	0.0990589	2	3.5	-6.48263
N#Cc1ccc(-c2ccc3c(c2)C(=O)c2cccc(O)c2C3=O)cc1	2.116	-6.96325	3.40741	97.7691	0.585587	1.67107	3.14312	1.14591	2.5	0.606451	0.98701	0.947194	0.407879	1	3.5	0.0727176
Oc1ccc(-c2ccc(C(F)(F)F)cc2)cc1-c1nc2ccccc2[nH]1	2.12	-5.63845	4.01144	97.7938	0.710463	0.979892	8.90838	0.725734	1.5	0.593099	0.846892	0.448684	0.164816	2	3.5	-6.86569
COc1ccc(-c2ccc3c(c2)C(=O)c2cccc(O)c2C3=O)cc1-c1ccccc1	2.121	-8.09519	4.34362	98.3024	0.57924	0.819927	3.22373	0.739612	2	0.541986	0.992009	0.940027	0.13515	1.5	3.5	4.21187
Oc1cc(-c2ccc(C(F)(F)F)cc2)ccc1-c1nc2ccccc2s1	2.122	-6.72549	3.8793	98.0665	0.544486	0.76471	6.78339	0.529542	1.5	0.486695	0.884212	0.349697	0.0928284	2	3.5	-8.36456
Oc1ccccc1-c1nc2ccc(-c3ccc(C(F)(F)F)cc3)cc2s1	2.127	-6.75668	3.89092	98.6203	0.54118	0.505633	6.2188	0.566282	1.5	0.412445	0.864595	0.363055	0.0880047	2	3.5	-6.53029
O=C(Nc1ccc2nc(-c3nc4ccccc4[nH]3)oc2c1)c1ccccc1	2.138	-4.79101	3.47568	98.2104	-0.351149	1.14627	1.76161	1.10883	2.5	0.626254	0.983411	0.741141	0.694654	1	3.5	-6.2886
O=c1c(O)c(-c2cccc(O)c2)oc2ccc(Oc3ccccc3)cc12	2.143	-4.32019	3.08717	98.5618	-0.694602	0.940698	6.43463	0.840294	1.5	0.280739	0.885536	0.674162	0.501057	2	3.5	-4.36647
Oc1ccccc1-c1nc2ccc(-c3ccc(C(F)(F)F)cc3)cc2[nH]1	2.146	-5.67461	4.03367	97.7168	0.687558	0.960144	6.95432	0.585559	1.5	0.549787	0.839426	0.486452	0.0746841	2	3.5	-9.25004
CNc1ccc(C(C)(C)C)cc1-c1nc2ccccc2s1	2.146	-5.93043	3.95834	98.3755	0.274234	1.45885	7.3634	0.228136	1.5	0.233666	0.874412	0.43306	0.449387	2	3.5	-7.05303
CNc1ccccc1-c1ccc2c(c1)C(=O)c1cccc(O)c1C2=O	2.146	-6.91956	3.72685	96.5697	0.406596	3.5825	4.56127	0.686468	2	0.238049	0.991996	0.967978	0.694632	1.5	3.5	0.806833
Oc1cc(-c2ccc(C(F)(F)F)cc2)ccc1-c1nc2ccccc2[nH]1	2.148	-5.54527	3.90503	97.2492	0.678594	1.46272	6.75757	0.693121	1.5	0.622344	0.857689	0.495768	0.132663	2	3.5	-5.6022
O=C(Nc1ccc2nc(-c3ccccc3)oc2c1)c1nc2ccccc2o1	2.15	-6.25672	4.14242	97.9829	0.0320773	1.34779	2.10614	0.905436	2	0.413385	0.986764	0.674614	0.316069	1.5	3.5	-7.24437
COc1ccccc1NC(=O)c1nc2ccc(-c3ccccc3O)cc2o1	2.152	-4.6018	3.32176	97.9266	-0.191743	1.66374	4.30063	0.518361	2	0.313114	0.896141	0.692398	0.453631	1.5	3.5	-3.12425
COc1ccc(-c2ccc3c(c2)C(=O)c2cc(-c4ccc(C)cc4)cc(O)c2C3=O)cc1	2.161	-8.6695	4.14689	98.1862	0.611499	0.897907	4.49628	0.608728	2	0.677933	0.99816	0.964982	0.147181	1.5	3.5	4.70988
Cc1cc(-c2ccc(-c3oc4ccccc4c(=O)c3O)cc2)cc(C)c1C	2.165	-5.08712	3.33322	98.4311	-0.069824	1.01632	5.71586	0.708983	1.5	0.344043	0.947943	0.659367	0.220767	2	3.5	-6.05931
CCN(CC)c1ccc(-c2ccc(-c3oc4ccccc4c(=O)c3O)cc2)cc1	2.169	-5.00713	4.06817	98.3406	-0.160424	0.841168	5.09226	0.471538	1.5	0.259734	0.946947	0.814466	0.138404	2	3.5	0.841528
CN(C)c1ccc(-c2ccc(-c3ccc4c(c3)C(=O)c3cccc(O)c3C4=O)cc2)cc1	2.179	-9.05569	4.1666	98.1772	0.606143	0.888647	3.95737	0.633998	2	0.505408	0.99619	0.980493	0.0512026	1.5	3.5	3.83693
Oc1ccc(-c2ccccc2C(F)(F)F)cc1-c1nc2ccccc2s1	2.181	-6.35668	4.0783	98.6469	0.372032	0.623314	7.45853	0.524746	1.5	0.321826	0.704509	0.418072	0.256808	2	3.5	-7.73314
CN(C)c1ccc(-c2cnc3c(ccc4cccc(O)c43)c2)cc1	2.183	-4.06341	3.54317	98.0488	0.0178014	1.06507	7.62389	0.325192	1.5	0.27622	0.919798	0.903464	0.18759	2	3.5	-6.84605
Cc1cc(-c2oc3ccccc3c(=O)c2O)cc(C)c1C	2.185	-4.69667	3.2955	98.4059	-0.178793	1.30399	8.0342	0.717514	1.5	0.122494	0.774638	0.550634	0.666939	2	3.5	-2.18001
N#Cc1cc(Cl)ccc1NC(=O)c1nc2ccccc2o1	2.186	-4.69954	3.08686	97.8542	-0.0536424	1.74784	3.60107	0.878709	2	0.55257	0.962322	0.527226	0.664676	1.5	3.5	-5.8139
CN(C)c1ccc(-c2ccc(-c3cc(O)c4c(c3)C(=O)c3ccccc3C4=O)cc2)cc1	2.188	-9.00092	4.20906	98.2925	0.582494	1.03163	4.66265	0.596918	2	0.453553	0.995508	0.96506	0.188906	1.5	3.5	3.36727
CC(C)(C)c1ccc(-c2ccc(-c3ccc4c(c3)C(=O)c3cccc(O)c3C4=O)cc2)cc1	2.189	-8.34494	3.74169	99.0459	0.791647	0.35752	4.17223	0.630595	2	0.685635	0.994369	0.893135	0.0448122	1.5	3.5	0.290846
Oc1cc(-c2ccccc2C(F)(F)F)ccc1-c1nc2ccccc2s1	2.193	-6.30502	4.02027	98.3718	0.478273	0.810706	6.82939	0.486062	1.5	0.32231	0.796697	0.463416	0.232235	2	3.5	-6.70037
CCN(CC)c1ccc(-c2ccc(-c3nc4ccccc4s3)c(O)c2)cc1	2.194	-6.25979	3.55512	98.5157	0.218418	0.924716	5.87083	0.268239	1.5	0.281452	0.933301	0.834704	0.244447	2	3.5	3.61129
CNc1ccc(-c2ccc(-c3nc4ccc(-c5ccccc5)cc4o3)c(O)c2)cc1	2.198	-6.02463	4.29911	98.5013	0.130965	0.832322	4.7928	0.525998	2	0.53893	0.981109	0.730386	0.154626	1.5	3.5	2.02715
CC(C)(C)c1ccc(-c2ccc(-c3cc(O)c4c(c3)C(=O)c3ccccc3C4=O)cc2)cc1	2.198	-8.37104	3.70125	98.8799	0.713267	0.475949	4.87491	0.577652	2	0.638214	0.993355	0.820559	0.168598	1.5	3.5	1.22306
CCN(CC)c1ccc(-c2ccc3nc(-c4ccccc4O)sc3c2)cc1	2.199	-6.25945	3.54971	98.685	0.23223	0.75529	5.44349	0.29354	1.5	0.225284	0.921832	0.842274	0.239924	2	3.5	6.77671
O=CNc1ccc(Cl)cc1-c1nc2ccccc2[nH]1	2.201	-4.27761	3.32561	98.8199	-0.515364	0.603204	4.7097	0.828137	2	0.237206	0.974997	0.746	0.505631	1.5	3.5	-11.9074
CCN(CC)c1ccc(-c2ccc3oc(-c4ccccc4)c(O)c(=O)c3c2)cc1	2.204	-4.97551	3.9972	98.405	-0.0944835	0.683886	5.55902	0.485565	1.5	0.207902	0.966709	0.738467	0.206351	2	3.5	4.80571
Cc1cc(-c2ccc3oc(-c4ccccc4)c(O)c(=O)c3c2)cc(C)c1C	2.204	-5.08328	3.49561	98.5314	-0.0119347	0.803104	6.28775	0.758046	1.5	0.286643	0.967811	0.560214	0.305315	2	3.5	-6.78212
CCN(CC)c1ccc(-c2ccc3c(c2)C(=O)c2cccc(O)c2C3=O)cc1	2.204	-7.51981	4.27732	98.0001	0.661761	1.59317	4.43007	0.50448	2	0.200427	0.981934	0.971705	0.341317	1.5	3.5	6.16578
N#Cc1ccc(-c2ccc(O)c(-c3nc4ccc(-c5ccccc5)cc4o3)c2)cc1	2.206	-7.24124	4.36291	98.3333	0.500078	1.11413	4.45288	0.847542	2	0.84419	0.974949	0.60292	0.206306	1.5	3.5	0.737888
O=C1c2cc(-c3ccc(-c4ccc(C(F)(F)F)cc4)cc3)ccc2C(=O)c2c(O)cccc21	2.21	-8.75006	4.36492	98.1138	1.10302	0.61801	4.2679	0.846682	2	0.696443	0.992876	0.852353	0.0194902	1.5	3.5	2.16615
Cc1cc(-c2ccc3c(c2)C(=O)c2cccc(O)c2C3=O)cc(C)c1C	2.211	-7.43094	3.62367	98.5515	0.7574	1.10045	4.89206	0.695644	2	0.287871	0.982885	0.939582	0.457969	1.5	3.5	3.86017
N#Cc1ccc(NC(=O)c2ccc3cc4ccccc4c(O)c3c2O)cc1	2.212	-5.1086	3.31378	98.5257	-0.245829	0.960912	1.07334	1.19488	2.5	0.669555	0.973734	0.828433	0.674295	1	3.5	-5.18333
CC(C)(C)Nc1ccc(-c2ccc(-c3oc4ccccc4c(=O)c3O)cc2)cc1	2.219	-5.09602	3.76223	98.5612	-0.119136	0.819784	5.12115	0.694373	1.5	0.53184	0.956515	0.553543	0.0604149	2	3.5	-6.36132
CN(C)c1cc(Cl)ccc1NC(=O)c1nc2ccccc2o1	2.228	-4.32947	3.55462	98.6872	-0.273784	0.872347	4.87432	0.541225	2	0.388544	0.96486	0.662094	0.524167	1.5	3.5	0.331991
Cc1cc(-c2ccc(-c3ccc(-c4oc5ccccc5c(=O)c4O)cc3)cc2)cc(C)c1C	2.238	-6.15317	3.359	98.2541	0.200565	0.90448	4.86287	0.675463	2	0.671106	0.98852	0.755949	0.0353309	1.5	3.5	-2.89421
CCN(CC)c1ccc(-c2ccc(-c3oc4ccc(C)cc4c(=O)c3O)cc2)cc1	2.249	-5.19164	4.13958	98.3174	-0.176183	0.901948	5.23038	0.491091	1.5	0.263845	0.934128	0.803236	0.143754	2	3.5	-0.251583
CNc1ccc(-c2ccc3c(c2)C(=O)c2cccc(O)c2C3=O)cc1-c1ccccc1	2.25	-8.10687	4.07949	97.9564	0.613574	1.339	3.57059	0.653879	2	0.480201	0.995762	0.945848	0.270576	1.5	3.5	1.41131
COc1cc(Cl)ccc1NC(=O)c1nc2ccc(-c3ccccc3O)cc2o1	2.256	-5.69234	3.52076	98.6572	-0.389134	0.817415	3.68344	0.623528	2	0.454205	0.944481	0.571077	0.492576	1.5	3.5	-3.92841
O=c1c(O)c(-c2nc3ccccc3[nH]2)oc2ccccc12	2.259	-3.83624	2.21	98.5037	-0.463549	0.972802	5.50342	0.879055	1.5	0.159905	0.740734	0.67337	0.460451	2	3.5	-7.18689
N#Cc1ccc(-c2ccc3c(c2)C(=O)c2cccc(O)c2C3=O)c(-c2ccccc2)c1	2.259	-8.19202	4.17572	98.5706	0.786594	0.839646	2.49225	1.04964	2.5	0.719941	0.988904	0.936564	0.263693	1	3.5	0.256373
CCCCN(CCCC)c1ccc(-c2oc3ccccc3c(=O)c2O)cc1	2.262	-5.03294	4.51273	98.4743	-0.120684	0.819696	4.6153	0.436938	2	0.571351	0.576884	0.499786	0.719158	1.5	3.5	-3.84979
Cc1cc(-c2ccc(-c3ccc4c(c3)C(=O)c3cccc(O)c3C4=O)cc2)cc(C)c1C	2.263	-8.60745	3.87964	98.6646	0.883241	0.826298	4.07199	0.672257	2	0.591025	0.996203	0.960277	0.106628	1.5	3.5	0.889031
Cc1ccc(-c2ccc3nc(-c4ccc(-c5ccc(N(C)C)cc5)cc4O)oc3c2)cc1	2.266	-6.66749	4.09914	98.3918	0.202378	0.717934	4.90257	0.483261	2	0.508586	0.961974	0.726177	0.176238	1.5	3.5	11.5188
CC(C)(C)Oc1ccc(-c2ccc(-c3ccc4c(c3)C(=O)c3cccc(O)c3C4=O)cc2)cc1	2.268	-8.31841	3.95025	99.3933	0.810879	0.386812	3.69615	0.727367	2	0.657121	0.993628	0.906116	0.0361298	1.5	3.5	1.97754
CCN(CC)c1ccc(-c2oc3cc(-c4ccc(C)cc4)ccc3c(=O)c2O)cc1	2.269	-5.29978	4.15737	98.4036	-0.108211	0.868486	4.96237	0.445095	2	0.223017	0.913507	0.768956	0.351291	1.5	3.5	0.401957
Cc1cc(-c2ccc(-c3oc4ccc(-c5ccccc5)cc4c(=O)c3O)cc2)cc(C)c1C	2.27	-5.64481	3.33003	98.6368	0.145439	0.603861	5.48017	0.733388	1.5	0.535311	0.980154	0.668192	0.0985987	2	3.5	-3.73822
O=C1c2cc(-c3ncc(-c4ccccc4)o3)ccc2C(=O)c2c(O)cccc21	2.272	-7.47219	4.19937	97.8903	0.499947	1.2852	3.00046	0.96123	2	0.14065	0.993766	0.914243	0.501393	1.5	3.5	-3.12801
O=C(Nc1ccc(Cl)cc1-c1nc2ccccc2[nH]1)c1nc2ccccc2o1	2.278	-5.62175	4.27116	98.7544	-0.389378	0.546743	2.86755	0.682579	2	0.695351	0.990599	0.754401	0.24279	1.5	3.5	-7.67246
Oc1ccc(-c2ccc(Cl)cc2C(F)(F)F)cc1-c1nc2ccccc2o1	2.281	-6.13059	4.20093	99.0237	0.212502	0.397034	5.94177	0.703168	1.5	0.418672	0.864527	0.185517	0.357277	2	3.5	0.161553
O=c1c(O)c(-c2nc3ccc(-c4ccccc4)cc3[nH]2)oc2ccccc12	2.281	-4.32899	3.14192	98.4977	-0.221842	0.599398	4.76377	0.727496	2	0.397971	0.927758	0.726449	0.110792	1.5	3.5	-7.16819
CCN(CC)c1ccc(-c2ccc(-c3nc4ccc(OC)cc4o3)c(O)c2)cc1	2.285	-5.88661	3.6283	97.9274	0.0173954	1.36681	5.90864	0.341056	1.5	0.284393	0.950966	0.747878	0.213724	2	3.5	10.221
CCN(CC)c1ccc(-c2ccc3oc(-c4ccc(-c5ccccc5)cc4)c(O)c(=O)c3c2)cc1	2.292	-5.34283	3.9638	98.3979	0.0986368	0.533525	4.94577	0.524429	2	0.455261	0.982034	0.830604	0.0497885	1.5	3.5	6.3244
Oc1cc(-c2ccc(Cl)cc2C(F)(F)F)ccc1-c1nc2ccccc2s1	2.293	-6.40834	3.91812	99.1142	0.413413	0.311745	5.34334	0.564138	1.5	0.47571	0.902287	0.314728	0.257965	2	3.5	-2.6592
O=C1c2cc(-c3ccc(-c4ccccc4)cc3O)ccc2C(=O)c2c(O)cc(-c3ccccc3)cc21	2.296	-9.17745	4.70658	98.2036	0.248231	0.499634	2.88183	0.844593	2	0.673723	0.997972	0.959052	0.128067	1.5	3.5	1.70408
O=CNc1ccccc1-c1oc2ccccc2c(=O)c1O	2.298	-3.44054	1.70003	98.8779	-0.600997	0.808368	4.13843	0.850834	2	0.0563932	0.96927	0.702526	0.415462	1.5	3.5	-6.75966
O=CNc1ccc2c(c1)C(=O)c1cc(-c3ccccc3)cc(O)c1C2=O	2.299	-6.69223	3.69047	97.5581	0.232575	1.77944	4.72603	0.716174	2	0.148602	0.999126	0.984423	0.437826	1.5	3.5	0.284611
CCN(CC)c1ccc(-c2ccc(-c3nc4cc(-c5ccccc5)ccc4o3)c(O)c2)cc1	2.299	-6.51528	3.96779	98.2615	0.355761	0.841631	4.88515	0.402929	2	0.426546	0.95763	0.728176	0.135608	1.5	3.5	10.6187
O=CNc1ccc2nc(-c3ccccc3O)oc2c1	2.299	-3.91667	2.76782	98.4493	-0.396352	1.17985	3.63061	0.743864	2	0.0417663	0.929789	0.763595	0.484971	1.5	3.5	-3.69096
NCc1ccc(-c2ccc3c(c2)C(=O)c2cccc(O)c2C3=O)c(O)c1	2.302	-3.71255	2.72446	93.4341	0.694522	8.47744	3.09114	0.926252	2.5	0.258712	0.82411	0.908933	0.915599	1	3.5	1.37167
Cc1cc(-c2ccccc2-c2ccc3c(c2)C(=O)c2cccc(O)c2C3=O)cc(C)c1C	2.304	-8.26781	4.00643	99.288	0.794675	0.356878	4.02924	0.634282	2	0.571573	0.993552	0.965678	0.151817	1.5	3.5	0.409996
CN(C)c1ccc(-c2ccc(-c3oc4ccc(N(C)C)cc4c(=O)c3O)cc2)cc1	2.306	-4.985	2.89497	97.4973	-0.0837616	1.39289	6.71013	0.716281	1.5	0.191757	0.963004	0.856074	0.139349	2	3.5	3.21624
CCN(CC)c1ccc(-c2ccc(-c3nc4ccc(-c5ccccc5)cc4o3)c(O)c2)cc1	2.313	-6.51784	3.94097	98.3466	0.320143	0.794484	4.97278	0.375215	2	0.44325	0.963124	0.749089	0.163165	1.5	3.5	9.85722
O=CNc1ccc(-c2cnc3c(ccc4cccc(O)c43)c2)cc1	2.316	-4.45688	3.07099	98.2577	-0.1733	1.79258	6.5209	0.519195	1.5	0.22117	0.992868	0.956822	0.0862959	2	3.5	-10.4284
Oc1cc(-c2ccc(Cl)cc2C(F)(F)F)ccc1-c1nc2ccccc2[nH]1	2.319	-5.80463	4.1741	98.9029	0.368044	0.35266	4.68007	0.675184	2	0.611713	0.877771	0.455926	0.346926	1.5	3.5	-1.56848
Cc1cc(-c2cc(O)c3c(c2)C(=O)c2cc(-c4ccccc4)ccc2C3=O)cc(C)c1C	2.32	-8.50046	3.88247	98.7762	0.81019	0.767596	4.92566	0.65649	2	0.579333	0.997419	0.958785	0.220263	1.5	3.5	3.70194
COc1ccc(-c2ccc3c(c2)C(=O)c2cccc(O)c2C3=O)cc1-c1ccc(C(C)(C)C)cc1	2.32	-8.12473	4.15111	99.3079	0.807512	0.359032	4.15208	0.645657	2	0.655583	0.991838	0.85493	0.0787485	1.5	3.5	1.25056
N#CC(=Cc1ccc2nc(-c3ccccc3O)oc2c1)c1ccccc1	2.321	-5.09735	3.82609	98.6717	-0.243006	0.900943	3.12455	0.657301	2	0.0728271	0.897102	0.620824	0.948927	1.5	3.5	-5.06031
Cc1cc(-c2ccc3oc(-c4ccc(Oc5ccccc5)cc4)c(O)c(=O)c3c2)cc(C)c1C	2.321	-5.08591	3.59512	98.8378	0.0899733	0.539427	4.72155	0.686113	2	0.598714	0.984328	0.759152	0.166314	1.5	3.5	-3.80168
CN(C)c1ccc(-c2ccc3oc(-c4ccc(C(F)(F)F)cc4)c(O)c(=O)c3c2)cc1	2.322	-5.3455	3.32218	98.933	0.0974443	0.453933	7.23237	0.796941	1.5	0.341644	0.926284	0.404591	0.0438959	2	3.5	3.97193
CN(C)c1ccc(-c2oc3ccc(-c4ccc(C(F)(F)F)cc4)cc3c(=O)c2O)cc1	2.322	-5.36658	3.3168	98.9333	0.115904	0.472024	7.07501	0.795138	1.5	0.321415	0.924377	0.407518	0.0672752	2	3.5	2.26619
CCN(CC)c1ccc(-c2ccc3occ(O)c(=O)c3c2)cc1	2.326	-5.2513	3.82531	97.9481	0.0661774	1.70655	9.13303	0.61445	1.5	0.193482	0.913496	0.79038	0.0846058	2	3.5	0.661666
O=c1ccc2ccc(O)c(-c3nc4ccccc4s3)c2o1	2.331	-4.98339	3.31384	97.9473	-0.193327	1.34433	3.35502	0.581394	2	0.0792295	0.934778	0.704414	0.443211	1.5	3.5	-0.28575
CCN(CC)c1ccc(-c2cc(O)c3c(c2)C(=O)c2cc(-c4ccccc4)ccc2C3=O)cc1	2.334	-8.47967	4.38389	98.4398	0.723286	0.947209	4.75514	0.461528	2	0.447244	0.997107	0.979081	0.188683	1.5	3.5	2.58532
CCN(CC)c1ccc(-c2ccc3c(c2)C(=O)c2cc(-c4ccccc4)cc(O)c2C3=O)cc1	2.334	-8.48144	4.38338	98.5387	0.728819	0.881112	4.87679	0.45975	2	0.468719	0.99764	0.978952	0.167283	1.5	3.5	3.35236
CN(C)c1ccc(-c2ccc(-c3nc4cc(C(F)(F)F)ccc4o3)c(O)c2)cc1	2.342	-5.59014	3.66191	98.4315	0.44093	0.803288	6.54386	0.560753	1.5	0.339085	0.893347	0.319708	0.0949431	2	3.5	6.57984
CN(C)c1ccc(NC(=O)c2nc3ccc(-c4nc5ccccc5o4)cc3o2)cc1	2.345	-5.10408	3.87429	98.2453	0.191188	1.45878	3.75691	0.573192	2	0.253436	0.98728	0.800125	0.471492	1.5	3.5	3.05421
CCN(CC)c1ccc(-c2ccc(-c3nc4ccc(Oc5ccccc5)cc4o3)c(O)c2)cc1	2.348	-7.58404	3.78899	98.5845	0.311729	0.670636	4.71109	0.392229	2	0.553768	0.970669	0.808459	0.253402	1.5	3.5	11.3553
O=c1c(O)c(-c2ccc(-c3ccc(C(F)(F)F)cc3)cc2)oc2ccc(-c3ccc(-c4ccccc4)cc3)cc12	2.349	-7.32917	3.95351	97.4335	0.69819	0.570705	4.76342	0.866714	2	0.885108	0.992725	0.449481	0.00218853	1.5	3.5	-4.05646
CCN(CC)c1ccc(-c2ccc(-c3nc4ccc(O)cc4o3)c(O)c2)cc1	2.353	-5.12024	3.42332	97.9741	-0.0494453	1.58977	4.81003	0.659346	2	0.22133	0.857277	0.711005	0.3777	1.5	3.5	9.69518
CCN(CC)c1ccc(-c2ccc(-c3nc4ccc(-c5ccc(C)cc5)cc4o3)c(O)c2)cc1	2.362	-6.62326	3.80975	98.3578	0.322962	0.751785	4.6532	0.375372	2	0.486273	0.961011	0.739892	0.19771	1.5	3.5	9.37735
N#Cc1cc(Cl)ccc1NC(=O)c1ccc2cc3ccccc3c(O)c2c1O	2.362	-6.18367	3.19937	99.0802	-0.344404	0.465903	1.04358	1.1659	2.5	0.516899	0.973037	0.61232	0.907193	1	3.5	-4.37721
Nc1ccc(-c2ccc(O)c(-c3nc4ccc(-c5ccc(C(F)(F)F)cc5)cc4o3)c2)cc1	2.365	-6.54818	3.50148	97.6631	0.816068	1.32094	6.00608	0.780691	1.5	0.63545	0.964251	0.658034	0.0402484	2	3.5	5.86389
COc1ccc(-c2ccc3c(c2)C(=O)c2cc(-c4ccc(-c5ccccc5O)cc4)cc(O)c2C3=O)cc1	2.368	-9.25365	4.37784	97.5365	0.485783	1.27528	2.95668	0.730067	2	0.699525	0.998537	0.975153	0.040813	1.5	3.5	4.98527
CN(C)c1ccc(-c2ccc(-c3nc4ccc(C(F)(F)F)cc4o3)c(O)c2)cc1	2.369	-5.60622	3.68936	98.6287	0.383712	0.745649	6.75257	0.52992	1.5	0.354702	0.852221	0.337116	0.106286	2	3.5	8.52363
Oc1ccccc1-c1nc2ccc(-c3ccc(-c4nc5cc(-c6ccccc6)ccc5o4)cc3)cc2s1	2.369	-10.1407	5.71201	98.9794	0.758202	0.467127	1.76161	0.953245	2	0.541987	0.993251	0.702677	0.0568619	1.5	3.5	-2.18496
CN(C)c1ccc(-c2ccc(-c3ccc4c(c3)C(=O)c3cccc(O)c3C4=O)c(O)c2)cc1	2.371	-8.08238	3.84645	98.0839	0.221735	1.10074	2.9742	0.821339	2	0.350194	0.992205	0.975473	0.1601	1.5	3.5	3.95554
COc1ccc(-c2cc(O)c3c(c2)C(=O)c2cc(-c4nc5ccccc5[nH]4)ccc2C3=O)cc1	2.377	-8.46189	3.91546	98.1327	0.529062	1.23411	3.98036	0.692676	2	0.599316	0.999002	0.982474	0.266645	1.5	3.5	2.3425
Oc1ccccc1-c1nc2ccc(-c3ccc(-c4nc5cc(-c6ccccc6)ccc5o4)cc3)cc2[nH]1	2.382	-7.37542	4.67105	97.9267	0.561806	0.803723	1.93261	0.963111	2	0.673628	0.991751	0.797182	0.0476443	1.5	3.5	-1.64841
CCN(CC)c1ccc(-c2cc(O)c3c(c2)C(=O)c2cc(-c4ccc(C)cc4)ccc2C3=O)cc1	2.384	-8.59404	4.16534	98.605	0.76447	0.811063	4.20351	0.462246	2	0.491447	0.99701	0.978293	0.223529	1.5	3.5	1.37388
CCN(CC)c1ccc(-c2ccc3c(c2)C(=O)c2cc(-c4ccc(C)cc4)cc(O)c2C3=O)cc1	2.384	-8.59404	4.16534	98.6097	0.759557	0.815593	4.42993	0.449245	2	0.511652	0.997516	0.978188	0.201609	1.5	3.5	3.35621
O=c1c(O)c(-c2ccccc2)oc2ccc(-c3ccc(NC(F)(F)F)cc3)cc12	2.391	-5.1266	3.25907	98.664	-0.208328	0.422156	5.29847	0.97932	1.5	0.506099	0.975381	0.314199	0.0183188	2	3.5	-7.53928
COc1ccc(-c2ccc3c(c2)C(=O)c2cccc(O)c2C3=O)cc1-c1cc(C)c(C)c(C)c1	2.395	-8.69786	4.13587	99.2711	0.759314	0.473938	4.11565	0.676595	2	0.58884	0.995182	0.948944	0.124018	1.5	3.5	4.41249
O=C1c2cc(-c3ccc(NC(F)(F)F)cc3)ccc2C(=O)c2c(O)cccc21	2.401	-6.8634	3.85683	97.87	0.651936	1.12171	4.25896	0.876821	2	0.493527	0.986629	0.847213	0.0356442	1.5	3.5	1.95245
O=c1c(O)c(-c2ccc(-c3ccc(-c4ccccc4)cc3)cc2)oc2ccc(-c3ccc(-c4ccc(C(F)(F)F)cc4)cc3)cc12	2.404	-8.613	4.37871	97.246	0.835367	0.557086	4.10412	0.892507	2	0.966738	0.998431	0.561229	0.000266992	1.5	3.5	-2.41307
O=CNc1ccc(Cl)cc1-c1ccc2c(c1)C(=O)c1cccc(O)c1C2=O	2.406	-6.16471	3.3896	98.5886	-0.0665966	0.584693	3.00951	0.72578	2	0.224172	0.998661	0.959006	0.444224	1.5	3.5	-1.5984
O=C(Nc1cc(O)c2c(ccc3cc(C(F)(F)F)cnc32)c1)c1ccccc1O	2.407	-6.09053	3.15148	98.8019	-0.360188	0.660145	4.58502	0.685415	2	0.5516	0.978819	0.596847	0.508979	1.5	3.5	-7.75197
CCN(CC)c1ccc(-c2ccc(-c3oc4ccc(C(F)(F)F)cc4c(=O)c3O)cc2)cc1	2.409	-5.3422	3.74483	98.3296	0.171546	0.693361	6.43696	0.601332	1.5	0.328857	0.934108	0.487906	0.0313239	2	3.5	-1.01635
CN(C)c1ccc(-c2ccc(-c3nc4cc(-c5ccc(C(F)(F)F)cc5)ccc4o3)c(O)c2)cc1	2.412	-6.79203	3.87311	97.964	0.668597	0.721807	5.98503	0.579479	1.5	0.631453	0.959732	0.3938	0.0235302	2	3.5	10.3891
CC(C)(C)c1ccc(O)c(Nc2ccc(-c3ccc4c(c3)C(=O)c3cccc(O)c3C4=O)cc2)c1	2.412	-7.36728	3.22675	98.8261	0.546926	0.706874	2.90442	0.96276	2	0.551606	0.993307	0.877025	0.136598	1.5	3.5	0.919658
CCN(CC)c1ccc(-c2oc3ccc(-c4ccc(C(F)(F)F)cc4)cc3c(=O)c2O)cc1	2.414	-5.3865	3.788	98.4295	0.163889	0.674323	6.66752	0.618486	1.5	0.301536	0.918608	0.42127	0.0841492	2	3.5	0.884156
CCN(CC)c1ccc(-c2ccc3oc(-c4ccc(C(F)(F)F)cc4)c(O)c(=O)c3c2)cc1	2.414	-5.40089	3.80464	98.4897	0.156387	0.609218	7.0246	0.622229	1.5	0.322482	0.923903	0.421085	0.0502347	2	3.5	5.42857
Oc1ccc(-c2ccc(Cl)cc2N(c2ccccc2)c2ccccc2)cc1-c1nc2ccccc2s1	2.414	-8.17756	4.17827	99.2857	0.287778	0.168325	3.16052	0.593427	2	0.451075	0.980509	0.115652	0.988515	1.5	3.5	-2.94702
CCN(CC)S(=O)(=O)Nc1ccc2c(c1)C(=O)c1cccc(O)c1C2=O	2.421	-5.9848	3.72595	98.1973	-0.267386	1.46704	4.23954	0.752988	2	0.130553	0.994173	0.843965	0.658552	1.5	3.5	3.05362
CCN(CC)c1ccc(-c2oc3cc(-c4ccc(C(F)(F)F)cc4)ccc3c(=O)c2O)cc1	2.428	-5.23402	3.73004	98.0149	0.242584	0.855671	6.61245	0.567568	1.5	0.339658	0.921363	0.475315	0.0764505	2	3.5	3.75551
CCN(CC)c1ccc(-c2ccc(-c3nc4cc(C(F)(F)F)ccc4o3)c(O)c2)cc1	2.429	-6.05404	3.45209	97.8947	0.4737	1.13214	6.26075	0.401837	1.5	0.319376	0.890844	0.335141	0.107807	2	3.5	6.08393
Cc1cc(-c2oc3ccc(N(C)C)cc3c(=O)c2O)cc(C)c1C	2.432	-4.88339	3.06777	97.3758	-0.031898	2.30523	8.72515	0.787073	1.5	0.0817735	0.806046	0.630666	0.69416	2	3.5	-2.46735
CCN(CC)c1ccc(-c2ccc(-c3nc4ccc(-c5ccc(N)cc5)cc4o3)c(O)c2)cc1	2.438	-5.77825	3.50579	97.7804	0.344529	1.91329	4.82484	0.433556	2	0.385679	0.978726	0.94813	0.115349	1.5	3.5	10.0871
O=C1c2cc(-c3nc4ccc(C(F)(F)F)cc4[nH]3)ccc2C(=O)c2c(O)cccc21	2.442	-6.51379	3.60738	98.1775	0.854481	0.976804	3.70976	0.989626	2	0.322736	0.980431	0.865531	0.23079	1.5	3.5	-0.293208
CCN(CC)c1ccc(-c2ccc(-c3nc4cc(-c5cccc(O)c5)ccc4o3)c(O)c2)cc1	2.444	-5.77248	3.56863	97.9706	0.07275	1.55342	4.53079	0.546008	2	0.40208	0.928431	0.731858	0.197838	1.5	3.5	11.5746
Oc1ccc(-c2ccc(C(F)(F)F)cc2)cc1-c1nc2ccc(-c3ccc(C(F)(F)F)cc3)cc2o1	2.446	-8.45146	4.90125	97.5085	1.01057	0.791907	6.73419	0.819962	1.5	0.820977	0.937404	0.0739586	0.0115489	2	3.5	4.46971
CCN(CC)c1ccc(-c2ccc(-c3nc4ccc(C(C)(C)C)cc4o3)c(O)c2)cc1	2.446	-7.73894	3.94158	98.3497	0.130858	0.972808	6.47423	0.276016	1.5	0.319615	0.889097	0.416525	0.26878	2	3.5	10.915
CCCCN(CCCC)c1ccc(-c2ccc(-c3nc4cc(-c5ccccc5)ccc4o3)c(O)c2)cc1	2.448	-8.01553	5.09745	98.9482	0.51753	0.389507	4.33521	0.368439	2	0.91278	0.883113	0.488039	0.235356	1.5	3.5	10.7003
CN(C)c1ccc(-c2ccc(-c3oc4ccc(-c5nc6ccccc6[nH]5)cc4c(=O)c3O)cc2)cc1	2.449	-5.79505	2.77382	98.7588	-0.0939372	0.439057	4.24289	0.707631	2	0.466716	0.992858	0.919986	0.0928911	1.5	3.5	1.72707
CCN(CC)c1ccc(-c2ccc(-c3nc4ccc(C(F)(F)F)cc4o3)c(O)c2)cc1	2.454	-6.0853	3.47972	98.1184	0.430704	0.976691	6.40419	0.375164	1.5	0.334545	0.848915	0.352954	0.120482	2	3.5	8.02771
O=c1c(O)c(-c2ccc3nc(-c4ccc(-c5ccc([N+](=O)[O-])cc5)cc4)oc3c2)oc2ccccc12	2.457	-6.16698	3.49469	97.9134	0.0516729	1.27056	2.33527	1.00593	2.5	0.421326	0.999485	0.921986	0.614896	1	3.5	-3.45938
CCN(CC)c1ccc(-c2ccc(-c3nc4ccc(-c5cccc(O)c5)cc4o3)c(O)c2)cc1	2.458	-5.65638	3.61274	98.0398	0.0221917	1.51564	4.79793	0.521151	2	0.422505	0.935665	0.755762	0.227739	1.5	3.5	11.0399
CCN(CC)c1ccc(-c2cc(O)c3c(c2)C(=O)c2cc(-c4ccc(N)cc4)ccc2C3=O)cc1	2.459	-8.51025	3.9804	97.7553	0.801236	2.2315	4.58112	0.519065	2	0.375298	0.998378	0.996332	0.142039	1.5	3.5	2.98469
CCN(CC)c1ccc(-c2ccc3c(c2)C(=O)c2cc(-c4ccc(N)cc4)cc(O)c2C3=O)cc1	2.459	-8.51025	3.9804	97.7725	0.797717	2.18664	4.56296	0.517102	2	0.370645	0.998352	0.996294	0.137349	1.5	3.5	3.52554
CNc1ccc(C)cc1-c1nc2ccc(-c3cc(C(C)(C)C)ccc3O)cc2o1	2.46	-6.89151	3.85463	97.359	0.200046	2.08265	5.0431	0.742947	1.5	0.24514	0.838165	0.315072	0.400201	2	3.5	-5.39107
CCCCN(CCCC)c1ccc(-c2ccc(-c3nc4ccc(-c5ccccc5)cc4o3)c(O)c2)cc1	2.461	-8.13395	5.06314	98.9695	0.472561	0.38588	4.4086	0.341108	2	0.918042	0.897233	0.515125	0.276694	1.5	3.5	9.87404
CCN(CC)c1ccc(-c2oc3cc(N(c4ccccc4)c4ccccc4)ccc3c(=O)c2O)cc1	2.462	-5.55703	3.96224	98.8702	0.123197	0.447075	3.80808	0.546764	2	0.0882809	0.913308	0.383006	0.963085	1.5	3.5	3.65692
CN(C)c1ccc(-c2ccc3nc(-c4ccc5c(c4)C(=O)c4cccc(O)c4C5=O)sc3c2)cc1	2.463	-8.92191	4.10297	98.8199	0.609726	0.868287	2.84045	0.830858	2	0.344013	0.998355	0.9805	0.147234	1.5	3.5	4.82153
CCN(CC)c1ccc2oc(-c3ccc(N(c4ccccc4)c4ccccc4)cc3)c(O)c(=O)c2c1	2.463	-5.59883	3.99362	98.8793	0.172137	0.408857	3.53909	0.56102	2	0.0774131	0.922961	0.403637	0.974314	1.5	3.5	-5.48344
CCN(CC)c1ccc(-c2ccc3c(c2)C(=O)c2cc(C#N)cc(O)c2C3=O)cc1	2.465	-7.7445	4.01834	98.5053	0.686269	0.967938	4.22579	0.864546	2	0.451291	0.993405	0.970321	0.217677	1.5	3.5	3.78862
CCN(CC)c1ccc(-c2oc3cc(-c4nc5ccccc5o4)ccc3c(=O)c2O)cc1	2.466	-4.84461	3.59804	98.1553	-0.082748	1.32659	4.00604	0.652753	2	0.0999644	0.967006	0.716927	0.41902	1.5	3.5	-0.195586
O=c1c(O)c(-c2nc3c4ccccc4c4ccccc4c3o2)oc2ccccc12	2.469	-5.12322	3.6815	98.3059	-0.259938	0.597854	4.76608	0.74837	2	0.194928	0.832373	0.738361	0.661491	1.5	3.5	1.93533
CN(C)c1ccc(-c2ccc(-c3nc4ccc(N(c5ccccc5)c5ccccc5)cc4o3)c(O)c2)cc1	2.473	-7.28698	4.81769	99.1672	0.517152	0.328286	3.95821	0.51947	2	0.247144	0.963394	0.362097	0.910868	1.5	3.5	9.22335
CN(C)c1ccc(-c2ccc3nc(-c4ccc5c(c4)C(=O)c4cccc(O)c4C5=O)[nH]c3c2)cc1	2.474	-8.7127	3.73886	98.6708	0.643218	0.758711	3.44818	0.666443	2	0.468093	0.997932	0.987704	0.127537	1.5	3.5	5.85657
CCN(CC)c1ccc(-c2cc3cc(-c4nc5ccccc5s4)c(O)cc3o2)cc1	2.475	-6.47655	3.67891	98.535	0.365307	0.946231	4.38336	0.454006	2	0.111297	0.95248	0.770598	0.573329	1.5	3.5	-2.6401
CCN(CC)c1ccc(-c2ccc3oc(-c4ccc(N(CC)CC)cc4)c(O)c(=O)c3c2)cc1	2.477	-5.72222	4.03659	98.0116	-0.089249	1.1537	5.54907	0.395623	1.5	0.152826	0.953693	0.872533	0.227205	2	3.5	5.11486
CCN(CC)c1ccc(-c2ccc3nc(-c4nc5cc(-c6ccccc6)ccc5o4)[nH]c3c2)cc1	2.479	-6.01364	3.80456	98.1066	0.404493	1.0345	4.61464	0.508042	2	0.636859	0.972619	0.853262	0.0325501	1.5	3.5	-1.73116
Cc1cc(-c2ccc(-c3ccc(-c4nc5cc(C(F)(F)F)ccc5o4)c(O)c3)cc2)cc(C)c1C	2.48	-8.24475	3.80917	98.4723	0.836542	0.659195	5.94994	0.600462	1.5	0.731379	0.975205	0.261729	0.0270059	2	3.5	0.0875871
CCN(CC)c1ccc(-c2ccc3oc(OC)c(O)c(=O)c3c2)cc1	2.483	-5.29001	3.79311	97.9224	-0.268756	1.4296	5.93833	0.789052	1.5	0.187309	0.938529	0.841333	0.138709	2	3.5	-0.575309
Nc1cc(Cl)ccc1-c1ccc(O)c(-c2nc3ccc(-c4ccc(C(F)(F)F)cc4)cc3o2)c1	2.484	-7.271	3.91952	98.1318	0.761782	0.957507	5.79872	0.895342	1.5	0.680584	0.984275	0.395753	0.178089	2	3.5	7.42239
CCCCN(CCCC)c1oc2ccccc2c(=O)c1O	2.484	-4.83036	4.00187	98.3239	0.2243	1.13763	5.92616	0.571227	1.5	0.389624	0.162681	0.348986	0.959261	2	3.5	-4.08671
COc1ccc(-c2cc(O)c3c(c2)C(=O)c2cc(-c4cc(C(C)(C)C)ccc4O)ccc2C3=O)cc1	2.484	-7.59025	3.55469	97.8526	0.487509	1.35923	4.062	0.750259	2	0.555073	0.99523	0.885078	0.1017	1.5	3.5	2.3707
CCN(CC)c1ccc(-c2ccc3oc(-c4cc(C)c(C)c(C)c4)c(O)c(=O)c3c2)cc1	2.485	-5.74514	4.5321	98.3801	0.0770954	1.01196	7.34973	0.378765	1.5	0.215027	0.938115	0.748096	0.29726	2	3.5	9.31669
CCN(CC)c1ccc(-c2ccc3c(=O)c(O)c(-c4ccc(N(CC)CC)cc4)oc3c2)cc1	2.49	-5.62811	3.89564	97.9585	-0.0753367	1.23004	5.51883	0.37265	1.5	0.175825	0.95551	0.895257	0.208609	2	3.5	0.700168
CN(C)c1ccc(-c2ccc3c(c2)C(=O)c2cccc(O)c2C3=O)s1	2.492	-6.27724	3.54062	98.091	0.617059	1.4113	3.88223	0.649118	2	0.257549	0.998461	0.975418	0.482512	1.5	3.5	-3.72108
O=c1c(O)c(-c2ccc(-c3ccc(-c4ccc(-c5nc6cc(-c7ccccc7)ccc6o5)cc4)cc3)cc2)oc2ccccc12	2.502	-8.57255	4.29783	96.9682	0.417621	0.918861	1.4556	1.09777	2.5	0.843992	0.999035	0.751082	0.00374249	1	3.5	-3.85204
CCN(CC)c1ccc(-c2ccc(-c3nc4cc(-c5ccc(C(F)(F)F)cc5)ccc4o3)c(O)c2)cc1	2.504	-6.74555	3.48813	97.5905	0.687452	1.03585	5.63575	0.457228	1.5	0.610446	0.958715	0.410651	0.027007	2	3.5	9.40315
CCN(CC)c1ccc(-c2ccc(-c3nc4ccc(N(CC)CC)cc4s3)c(O)c2)cc1	2.505	-7.20945	3.56902	98.4839	0.256372	0.903682	5.4386	0.269313	1.5	0.264142	0.958129	0.913356	0.242889	2	3.5	6.47613
Nc1cc(=O)oc2c(-c3nc4ccccc4s3)c(O)ccc12	2.508	-4.77085	3.04048	97.5681	0.0510878	1.68942	2.62335	0.905359	2	0.068748	0.942811	0.864136	0.628924	1.5	3.5	-0.314327
N#CC(C#N)=Cc1ccc(-c2ccc3c(c2)C(=O)c2cccc(O)c2C3=O)cc1	2.508	-7.52158	3.77371	98.4716	-0.211439	0.957543	2.69851	1.01943	2.5	0.147444	0.996279	0.981167	0.908784	1	3.5	0.927324
O=C1c2ccccc2C(=O)c2c(O)cc(-c3nc4ccc(-c5ccc(C(F)(F)F)cc5)cc4[nH]3)cc21	2.511	-7.7388	3.62789	98.1911	1.09907	0.866824	4.22164	0.739629	2	0.624102	0.996641	0.83695	0.178335	1.5	3.5	-2.29276
CNc1cc(=O)oc2c(-c3nc4ccccc4s3)c(O)ccc12	2.517	-4.95182	3.25365	98.3391	-0.145938	1.20909	3.79627	0.557632	2	0.0911818	0.961186	0.738762	0.490902	1.5	3.5	-0.850731
O=c1c(O)c(-c2ccc(N(c3ccccc3)c3nc4ccccc4o3)cc2)oc2ccccc12	2.525	-5.3434	3.72168	98.4143	-0.127241	0.622868	1.55364	0.673396	2	0.36724	0.982252	0.51046	0.310959	1.5	3.5	1.04571
CCN(CC)c1cc(O)c2c(c1)C(=O)c1cc(-c3ccc(-c4ccc(N(C)C)cc4)cc3)ccc1C2=O	2.525	-8.87606	4.28874	98.863	0.876554	0.642445	4.7885	0.442753	2	0.56182	0.998674	0.992163	0.0554074	1.5	3.5	3.64965
CCN(CC)c1ccc(-c2ccc3c(c2)C(=O)c2cc(OC(C)(C)C)cc(O)c2C3=O)cc1	2.528	-8.19101	4.19468	98.9192	0.897245	0.680107	5.74022	0.452769	1.5	0.253286	0.973931	0.905809	0.143185	2	3.5	3.44022
N#Cc1ccc(-c2ccc3c(c2)C(=O)c2cccc(O)c2C3=O)c(-c2ccc(-c3ccc([N+](=O)[O-])cc3)cc2)c1	2.531	-9.24694	4.04027	98.7304	0.716842	0.635293	1.76235	1.10734	2.5	0.942807	0.999942	0.996446	0.182297	1	3.5	-0.844711
COc1ccc(C#N)cc1-c1ccc2c(c1)C(=O)c1cc(-c3ccc(C#N)cc3)cc(O)c1C2=O	2.534	-8.21198	3.59551	96.3771	0.484506	3.10799	3.7113	1.41338	2.5	0.958972	0.998892	0.959855	0.137818	1	3.5	2.61838
Cc1cc(-c2ccc3oc(-c4ccc(N(c5ccccc5)c5ccccc5)cc4)c(O)c(=O)c3c2)cc(C)c1C	2.538	-6.38177	3.80225	99.3156	0.470032	0.293299	3.54827	0.6784	2	0.27623	0.980935	0.317931	0.905572	1.5	3.5	4.1727
COc1ccc(-c2nc3sc(-c4cc(C(C)(C)C)ccc4O)nc3s2)cc1	2.541	-6.71504	3.36398	98.4129	0.264664	1.10201	5.71211	0.793912	1.5	0.171001	0.987716	0.410356	0.696585	2	3.5	-4.16648
CCN(CC)c1ccc(-c2oc3cc(-c4nc5cc(C)ccc5o4)ccc3c(=O)c2O)cc1	2.542	-5.17987	3.62478	98.1258	-0.0839682	1.38679	3.43988	0.813106	2	0.106283	0.96245	0.70671	0.4536	1.5	3.5	2.14669
CCCCN(CCCC)c1ccc(-c2ccc3oc(-c4ccc(C(F)(F)F)cc4)c(O)c(=O)c3c2)cc1	2.551	-6.33359	4.29842	99.3612	0.381749	0.220586	5.49933	0.640309	1.5	0.87057	0.802228	0.206466	0.0929133	2	3.5	4.80629
CCCCN(CCCC)c1ccc(-c2oc3ccc(-c4ccc(C(F)(F)F)cc4)cc3c(=O)c2O)cc1	2.551	-6.30424	4.28794	99.367	0.33189	0.227542	5.2747	0.649576	1.5	0.859047	0.790939	0.210095	0.147784	2	3.5	1.6947
CC(C)(C)N(c1ccccc1)c1ccc(-c2cc(O)c3c(c2)C(=O)c2ccccc2C3=O)cc1	2.552	-7.35863	4.56018	98.9842	0.507995	0.612208	4.81727	0.618716	2	0.193764	0.987385	0.830704	0.5004	1.5	3.5	2.34735
CCCCN(CCCC)c1ccc2oc(-c3ccc(-c4ccc(C(F)(F)F)cc4)cc3)c(O)c(=O)c2c1	2.554	-6.2739	4.27495	99.2402	0.421436	0.200166	5.37499	0.627493	1.5	0.8832	0.81049	0.214249	0.133878	2	3.5	-1.13823
CCCCN(CCCC)c1ccc(-c2ccc(-c3nc4cc(C(F)(F)F)ccc4o3)c(O)c2)cc1	2.555	-7.46168	4.49544	99.1813	0.676772	0.31488	5.34756	0.384589	1.5	0.868456	0.731769	0.152095	0.191639	2	3.5	5.85562
CCN(CC)c1ccc(-c2ccc(-c3nc4ccc(N(c5ccccc5)c5ccccc5)cc4o3)c(O)c2)cc1	2.565	-7.93389	4.44375	98.8737	0.59464	0.368346	3.51731	0.46955	2	0.230912	0.962465	0.378438	0.921699	1.5	3.5	8.8081
CCCCN(CCCC)c1ccc2c(c1)C(=O)c1cc(C(F)(F)F)cc(O)c1C2=O	2.57	-7.97769	4.84749	99.1092	0.885043	0.384225	4.88817	0.525993	2	0.678906	0.885559	0.688837	0.633078	1.5	3.5	1.60352
CCN(CC)c1ccc(-c2ccc3c(c2)C(=O)c2cc(-c4nc5ccccc5s4)cc(O)c2C3=O)cc1	2.571	-8.48471	3.66128	98.6173	0.687717	1.00137	4.38787	0.380211	2	0.342739	0.999312	0.982792	0.175348	1.5	3.5	5.83652
CCN(CC)c1ccc(-c2ccc(-c3nc4ccc(-c5ccc(-c6ccccc6)c(O)c5)cc4o3)c(O)c2)cc1	2.577	-6.4997	3.84264	98.27	0.345567	0.738594	2.88943	0.56826	2	0.635122	0.983696	0.798996	0.0824478	1.5	3.5	10.3263
CCN(CC)c1ccc(-c2oc3cc(-c4ccc(N(c5ccccc5)c5ccccc5)cc4)ccc3c(=O)c2O)cc1	2.577	-5.74487	3.92811	98.8055	0.315865	0.335638	3.15529	0.575906	2	0.256003	0.977527	0.590025	0.834937	1.5	3.5	1.37739
N#CC(C#N)=Cc1ccc2c(c1)C(=O)c1cccc(O)c1C2=O	2.58	-5.50928	3.10522	97.8884	-0.372876	1.50496	3.04866	1.01043	2.5	0.042667	0.987279	0.971541	0.969578	1	3.5	1.48951
CCCCN(CCCC)c1ccc(-c2nc3ccc(-c4ccc(C(F)(F)F)cc4)cc3o2)c(O)c1	2.581	-7.6025	4.49951	99.2943	0.815463	0.270651	5.38587	0.37368	1.5	0.882226	0.722219	0.154518	0.296852	2	3.5	12.2291
N#CC(C#N)=Cc1cc(O)c2c(c1)C(=O)c1ccccc1C2=O	2.581	-5.65895	3.24621	98.0773	-0.373617	1.24672	3.00364	1.04948	2.5	0.0494872	0.987718	0.963992	0.984011	1	3.5	-0.578213
Oc1ccc(-c2ccc(Cl)cc2C(F)(F)F)cc1-c1nc2ccc(-c3ccc(C(F)(F)F)cc3)cc2o1	2.582	-8.4665	4.80663	98.648	0.918696	0.267917	6.07589	0.821589	1.5	0.8038	0.939871	0.06402	0.0404694	2	3.5	7.69213
CN(C)c1ccc(-c2ccc(-c3oc4ccc(-c5ccc(C(F)(F)F)cc5)cc4c(=O)c3O)c(O)c2)cc1	2.582	-5.74112	3.13268	99.1269	0.0771097	0.345384	6.91034	0.872292	1.5	0.541624	0.967383	0.477563	0.0212888	2	3.5	4.18423
COc1ccc(-c2ccc3c(c2)C(=O)c2cccc(O)c2C3=O)cc1-c1ccc(-c2cc(C(C)(C)C)ccc2O)cc1	2.591	-8.34106	3.80941	98.9492	0.757721	0.594135	1.92085	1.09203	2.5	0.722485	0.994277	0.872912	0.029462	1	3.5	-1.06847
N#Cc1nc2ccc(NC(=O)c3nc4ccccc4o3)cc2o1	2.593	-4.22888	2.85918	96.7103	-0.0209862	2.7114	2.52932	0.995039	2	0.367306	0.990859	0.678294	0.489919	1.5	3.5	-5.75085
COc1ccc(-c2nc3sc(-c4cc(-c5ccc(-c6ccccc6)c(O)c5)ccc4O)nc3s2)cc1	2.596	-7.7014	3.60945	98.6686	0.446679	0.924965	2.68615	1.06203	2.5	0.532089	0.998402	0.771117	0.328519	1	3.5	1.04569
CCN(CC)c1ccc(-c2ccc3nc(-c4nc5cc(C(C)(C)C)ccc5o4)[nH]c3c2)cc1	2.598	-7.08762	4.21759	98.6769	0.334913	0.726573	6.02846	0.423494	1.5	0.481802	0.928196	0.602616	0.0635186	2	3.5	-2.44225
CN(C)c1ccc(-c2cc(O)c3c(c2)C(=O)c2cc(-c4cc(C(C)(C)C)ccc4O)ccc2C3=O)cc1	2.598	-7.85138	3.29452	98.1137	0.532673	1.2937	4.41629	0.693236	2	0.396249	0.992984	0.922139	0.130376	1.5	3.5	3.30051
CN(C)c1ccc(-c2cc3cc(-c4nc5cc(C(C)(C)C)ccc5o4)c(O)cc3o2)cc1	2.602	-6.87663	3.80341	98.5369	0.406814	0.825649	5.52784	0.667232	1.5	0.132815	0.943808	0.319378	0.51605	2	3.5	4.10566
CCN(CC)c1ccc(-c2ccc3nc(-c4nc5cc(C(F)(F)F)ccc5o4)[nH]c3c2)cc1	2.605	-5.33768	3.7906	97.8653	0.671328	1.37755	5.8759	0.526014	1.5	0.512782	0.915786	0.531002	0.0227426	2	3.5	-1.58616
CCN(CC)c1ccc2cc(-c3ccc4c(c3)C(=O)c3cc(OC)cc(O)c3C4=O)oc2c1	2.606	-7.76472	4.09389	98.6308	0.799405	1.02983	4.58373	0.658236	2	0.136548	0.995302	0.959518	0.686304	1.5	3.5	2.38581
CCCCN(CCCC)c1ccc2oc(-c3ccc(N(c4ccccc4)c4ccccc4)cc3)c(O)c(=O)c2c1	2.606	-6.18698	4.66204	99.2871	0.35681	0.211178	3.10202	0.587558	2	0.537619	0.809871	0.193381	0.987593	1.5	3.5	-5.3168
CC(=O)Nc1cccc2c1-c1nc3cccc4c3c(c1C2)CC4	2.611	-4.8469	3.24478	95.8427	0.724482	3.80518	3.5259	0.549814	2	0.235627	0.598286	0.920427	0.915645	1.5	3.5	-4.84272
O=C1c2cc(-c3ccc(N(c4ccccc4)C(F)(F)F)cc3)ccc2C(=O)c2c(O)cccc21	2.612	-6.97267	4.01852	98.3753	0.529319	0.528088	2.86251	0.723609	2	0.321759	0.973154	0.945423	0.193081	1.5	3.5	5.37824
COc1ccc(-c2ccc3c(c2)C(=O)c2cccc(O)c2C3=O)cc1-c1ccc(-c2ccc(-c3ccc(-c4ccccc4)c(O)c3)cc2)cc1	2.618	-11.2429	5.44691	98.1907	0.949009	0.503981	0.933245	1.13747	2.5	0.968641	0.999802	0.980713	0.00177093	1	3.5	1.24001
COc1ccc(C#N)cc1-c1nc2sc(-c3cc(-c4ccccc4)ccc3O)nc2s1	2.619	-6.59895	3.62658	98.7488	0.47558	1.08646	5.41708	1.01545	2	0.633277	0.993279	0.634547	0.622566	1.5	3.5	-1.49447
CN(C)c1ccc(-c2ccc(-c3oc4ccc(-c5nc6ccccc6[nH]5)cc4c(=O)c3O)cc2O)cc1	2.622	-5.20512	2.75728	98.5529	-0.259275	0.634024	3.68368	0.888949	2	0.325037	0.984665	0.903079	0.211539	1.5	3.5	3.80783
CCN(CC)c1ccc(-c2ccc3oc(-c4nc5cc(-c6ccccc6)ccc5o4)c(O)c(=O)c3c2)cc1	2.624	-5.09181	4.02662	98.4545	0.15592	0.669383	3.8586	0.662721	2	0.374429	0.937833	0.812669	0.0690196	1.5	3.5	10.0952
CCN(CC)c1cc(O)c2c(c1)C(=O)c1cc(-c3ccccc3NC=O)ccc1C2=O	2.626	-6.57686	3.75626	98.0361	0.674149	1.65066	4.22991	0.48277	2	0.158027	0.998921	0.989824	0.488569	1.5	3.5	2.18621
CCN(CC)c1ccc(-c2nc3sc(-c4cc(-c5ccc(-c6ccccc6)cc5)ccc4O)nc3s2)cc1	2.626	-8.31859	3.6444	99.0905	0.680735	0.556802	4.33038	0.640674	2	0.538551	0.998909	0.873429	0.148992	1.5	3.5	3.9172
CCN(CC)c1ccc(-c2ccc(-c3nc4cc(-c5ccc(-c6nc7ccccc7s6)cc5)ccc4o3)c(O)c2)cc1	2.627	-8.41037	4.44051	98.7643	0.662788	0.652272	3.17088	0.476828	2	0.602616	0.997255	0.841989	0.0339756	1.5	3.5	9.53786
CCCCN(CCCC)c1oc2ccc(-c3ccc(C(F)(F)F)cc3)cc2c(=O)c1O	2.628	-6.1965	4.37817	99.578	0.673854	0.147532	6.87216	0.523008	1.5	0.747928	0.357244	0.126366	0.571859	2	3.5	-3.38486
COc1ccc(-c2ccc(-c3nc4ccc(-c5nc6ccc(NO)cc6o5)cc4o3)c(O)c2)cc1	2.629	-5.5597	3.52925	97.7755	0.0404583	1.94738	3.17662	1.12642	2.5	0.485488	0.998277	0.919353	0.444099	1	3.5	3.80607
CCN(CC)c1ccc(-c2ccc(-c3nc4cc(-c5ccc(-c6nc7ccccc7s6)c(O)c5)ccc4o3)cc2)cc1	2.63	-8.49958	4.26672	98.7241	0.78604	0.718424	1.74829	0.820963	2	0.591402	0.997102	0.844692	0.0333128	1.5	3.5	6.7491
CCN(CC)c1ccc(-c2ccc3oc(-c4ccc(-c5ccc(-c6nc7ccccc7s6)cc5)cc4)c(O)c(=O)c3c2)cc1	2.637	-7.10731	3.48182	98.841	0.468011	0.499827	3.11401	0.568511	2	0.61251	0.998718	0.900121	0.0135225	1.5	3.5	5.53709
CCN(CC)c1ccc(-c2ccc3oc(OC(C)(C)C)c(O)c(=O)c3c2)cc1	2.639	-5.45908	4.0828	98.3253	-0.201864	1.14134	6.34238	0.579853	1.5	0.183908	0.943291	0.805118	0.210515	2	3.5	-2.69257
CCN(CC)c1ccc(-c2ccc(-c3nc4ccc(-c5ccc(-c6nc7ccccc7s6)cc5)cc4o3)c(O)c2)cc1	2.639	-8.45617	4.46986	98.7768	0.628868	0.637927	3.31924	0.450356	2	0.616383	0.997518	0.853898	0.0429909	1.5	3.5	9.27773
O=C1c2cc(-c3ccc(-c4nc5ccc(-c6ccc(-c7ccc(-c8ccccc8)cc7)cc6)cc5o4)cc3)ccc2C(=O)c2c(O)cccc21	2.641	-13.0372	5.7703	98.0324	1.04577	0.581645	0.779315	1.18508	2.5	0.943881	0.999942	0.977343	0.00200527	1	3.5	-1.95552
CCN(CC)c1ccc(-c2ccc(-c3nc4cc(-c5ccc([N+](=O)[O-])c(O)c5)ccc4o3)c(O)c2)cc1	2.643	-6.85154	3.33023	98.8489	-0.218478	0.63051	3.87766	0.592397	2	0.287551	0.997824	0.874538	0.472272	1.5	3.5	11.8209
COc1ccc(OC)c(-c2nc3sc(-c4cc(-c5ccccc5O)ccc4O)nc3s2)c1	2.647	-5.73303	3.35114	98.2008	0.117669	1.26939	4.41523	0.969115	2	0.211861	0.988969	0.708893	0.471613	1.5	3.5	-0.108717
COc1ccc(-c2nc3ccccc3s2)cc1-c1nc2sc(-c3ccccc3O)nc2s1	2.648	-8.51213	4.66986	98.1791	0.541649	1.30677	4.07048	0.664591	2	0.123306	0.998452	0.743701	0.630225	1.5	3.5	-4.45475
CCN(CC)c1ccc(-c2ccc3c(c2)C(=O)c2cc(-c4ccc(-c5ccc(N)cc5C)cc4)cc(O)c2C3=O)cc1	2.649	-9.25752	4.26674	98.0495	0.942845	1.49218	4.14115	0.507835	2	0.646577	0.999587	0.997563	0.0401044	1.5	3.5	2.20929
CCCCN(CCCC)c1ccc(-c2ccc3oc(-c4nc5ccccc5o4)c(O)c(=O)c3c2)cc1	2.651	-5.76714	4.46023	98.7029	0.115674	0.669073	3.91479	0.553412	2	0.763063	0.72161	0.617786	0.229902	1.5	3.5	9.76305
Cc1cc(-c2oc3ccc(-c4oc5ccccc5c(=O)c4O)cc3c(=O)c2O)cc(C)c1C	2.652	-4.12589	2.99431	98.5462	-0.299137	0.891865	5.39647	0.866123	1.5	0.107463	0.962796	0.580513	0.478862	2	3.5	6.18486
CCN(CC)c1ccc(-c2cc3cc(-c4nc5cc(-c6ccc(-c7ccccc7)cc6)ccc5o4)c(O)cc3o2)cc1	2.653	-8.18607	4.53459	98.3961	0.711592	0.661039	3.32751	0.602413	2	0.521497	0.994819	0.777667	0.0601623	1.5	3.5	6.07977
O=c1c(O)c(-c2n[nH]c3c2ccc2cccnc23)oc2ccccc12	2.661	-4.19545	2.40161	98.3809	-0.249075	0.749901	4.97829	0.750901	2	0.166722	0.984414	0.824233	0.307092	1.5	3.5	-4.8415
CCN(CC)c1ccc(-c2cc3cc(-c4nc5ccc(-c6ccc(-c7ccccc7)cc6)cc5o4)c(O)cc3o2)cc1	2.664	-8.21287	4.53689	98.531	0.684624	0.614325	3.43865	0.578038	2	0.533283	0.99532	0.79064	0.0781108	1.5	3.5	5.95817
N#CC(C#N)=Cc1ccc(-c2ccc3c(c2)C(=O)c2cccc(O)c2C3=O)cc1-c1ccccc1	2.664	-8.73445	4.36549	98.8518	0.032897	0.49778	2.59514	0.952386	2	0.354414	0.999202	0.975292	0.239663	1.5	3.5	0.288902
COc1ccc(OC)c(-c2nc3sc(-c4cc(C(C)(C)C)ccc4O)nc3s2)c1	2.665	-6.7194	3.50741	98.1357	0.346816	1.47024	5.80836	0.845309	1.5	0.215947	0.988268	0.418788	0.488178	2	3.5	-7.66818
CCN(CC)c1ccc(-c2ccc3c(c2)C(=O)c2cc(-c4ccc(-c5nc6ccccc6o5)cc4)cc(O)c2C3=O)cc1	2.666	-9.89483	4.44234	98.4315	0.9161	1.00865	2.06839	0.806807	2	0.53961	0.99972	0.979325	0.0626366	1.5	3.5	1.7011
CCN(CC)c1ccc(-c2ccc3c(c2)C(=O)c2cc(-c4nc5ccc(OC)cc5[nH]4)cc(O)c2C3=O)cc1	2.666	-7.87938	3.73661	98.6108	0.779628	0.976952	4.32952	0.498792	2	0.535284	0.999525	0.991464	0.133847	1.5	3.5	7.042
CCN(CC)c1ccc2cc(-c3ccc(-c4oc5ccc(N(C)C)cc5c(=O)c4O)cc3)oc2c1	2.668	-5.3153	3.28146	98.2163	0.038974	1.24501	4.51927	0.715731	2	0.0674071	0.972856	0.790803	0.563043	1.5	3.5	6.48199
CCN(CC)c1ccc(-c2ccc(-c3nc4ccc(-c5cc6ccc(O)cc6o5)cc4s3)c(O)c2)cc1	2.669	-6.55491	3.40581	98.362	0.368399	1.0392	2.77119	0.90329	2	0.339251	0.990572	0.854428	0.168678	1.5	3.5	10.4137
CCN(CC)c1cc(=O)oc2c(-c3nc4ccccc4s3)c(O)ccc12	2.672	-5.66191	3.75384	98.739	-0.0297179	0.93919	3.90227	0.444395	2	0.0848902	0.906483	0.741254	0.652938	1.5	3.5	0.819878
CC(C)(C)N(C(=O)Nc1ccc2c(c1)C(=O)c1cccc(O)c1C2=O)c1nc2ccccc2s1	2.673	-7.68165	4.11681	97.8637	0.356605	1.61748	2.50868	0.731986	2	0.176598	0.997172	0.955727	0.642443	1.5	3.5	0.967576
CN(C)c1ccc(-c2ccc(-c3ccc4oc(-c5nc6ccccc6[nH]5)c(O)c(=O)c4c3)c(O)c2)cc1	2.676	-5.46206	2.99846	98.7239	-0.279615	0.53569	4.25572	0.74237	2	0.434054	0.974532	0.869863	0.0590748	1.5	3.5	2.41447
CCN(CC)c1ccc(-c2cc3cc(-c4nc5cc(C(C)(C)C)ccc5o4)c(O)cc3o2)cc1	2.678	-8.16733	4.29569	98.6597	0.315821	0.753742	5.12399	0.531467	1.5	0.127591	0.942092	0.333377	0.556502	2	3.5	3.53954
CCN(CC)c1ccc(-c2cc3cc(-c4nc5cc(N(C)C)ccc5o4)c(O)cc3o2)cc1	2.679	-5.76358	3.8012	98.2114	0.242483	1.1988	4.98536	0.571911	2	0.0723125	0.952739	0.738587	0.66139	1.5	3.5	10.0082
CCN(CC)c1ccc(-c2cc(O)c3c(c2)C(=O)c2cc(-c4cc(C(C)(C)C)ccc4O)ccc2C3=O)cc1	2.683	-8.86111	3.85591	98.4225	0.580832	1.10438	4.07253	0.578922	2	0.381517	0.993036	0.929006	0.147543	1.5	3.5	4.02896
CCN(CC)c1ccc(-c2ccc3c(c2)C(=O)c2cc(-c4cc(C(C)(C)C)ccc4O)cc(O)c2C3=O)cc1	2.684	-8.83396	3.85377	98.6122	0.606822	0.864458	4.80025	0.57246	2	0.418764	0.994477	0.93627	0.108177	1.5	3.5	5.62789
CCCCN(CCCC)c1ccc(-c2ccc(-c3nc4cc(-c5cc(C)c(C)c(C)c5)ccc4o3)c(O)c2)cc1	2.685	-9.00608	5.53525	99.0704	0.624525	0.426684	4.94026	0.355054	2	0.932839	0.938326	0.505323	0.241059	1.5	3.5	10.0734
O=c1c(O)c(-c2oc3ccc(-c4ccc(N(c5ccccc5)c5ccccc5)cc4)cc3c(=O)c2O)oc2ccccc12	2.686	-5.71451	3.76519	98.9655	-0.110775	0.232106	2.73462	0.855373	2	0.209626	0.955162	0.417533	0.844496	1.5	3.5	9.23534
CCCCN(CCCC)c1ccc2oc(N(C)C)c(O)c(=O)c2c1	2.69	-4.79761	3.93704	97.6467	0.257753	2.29867	6.30303	0.340643	1.5	0.375803	0.439829	0.544744	0.693337	2	3.5	-3.76258
CCN(CC)c1ccc(-c2ccc3c(c2)C(=O)c2cc(-c4nc5cc(-c6ccccc6)ccc5o4)cc(O)c2C3=O)cc1	2.695	-9.54589	4.33591	98.4899	0.852575	0.813343	3.26544	0.606601	2	0.477789	0.999458	0.968232	0.0989518	1.5	3.5	4.73606
CN(C)c1ccc(-c2ccc3c(c2)C(=O)c2cc(-c4nc5cc(C(F)(F)F)ccc5o4)cc(O)c2C3=O)cc1	2.697	-8.21782	3.71684	98.6592	0.905044	0.656214	4.63917	0.781854	2	0.39578	0.998596	0.843915	0.0670419	1.5	3.5	7.06125
CCN(CC)c1ccc(-c2cc3cc(-c4nc5ccc(C(C)(C)C)cc5o4)c(O)cc3o2)cc1	2.701	-8.18622	4.30313	98.5304	0.261936	0.850747	5.31252	0.491014	1.5	0.140174	0.927823	0.351134	0.570846	2	3.5	3.22287
CCN(CC)c1ccc2cc(-c3ccc4c(c3)C(=O)c3cc(-c5ccc(-c6ccccc6)cc5)cc(O)c3C4=O)oc2c1	2.701	-10.0094	4.60866	98.5507	1.03931	0.69167	2.87332	0.74088	2	0.483871	0.999381	0.973945	0.221433	1.5	3.5	0.390456
Cc1cc(-c2ccc(-c3oc4ccc(-c5nc6cc([N+](=O)[O-])ccc6o5)cc4c(=O)c3O)cc2)cc(C)c1C	2.702	-6.42436	3.11003	98.6443	0.0840351	0.743286	3.21191	1.18221	2.5	0.362782	0.999783	0.904992	0.613197	1	3.5	5.3602
N#CC(C#N)=Cc1ccc(-c2ccc(-c3nc4cc(C(F)(F)F)ccc4o3)c(O)c2)cc1	2.704	-7.02698	4.001	99.4536	-0.180287	0.354113	3.70059	0.876102	2	0.241102	0.975238	0.428691	0.705356	1.5	3.5	-4.34781
CCN(CC)c1ccc(-c2cc3cc(-c4nc5ccc(-c6cccc(O)c6)cc5o4)c(O)cc3o2)cc1	2.705	-6.22025	3.64612	98.0708	0.168525	1.49134	3.53118	0.749174	2	0.202715	0.960012	0.701756	0.518897	1.5	3.5	5.49595
CCCCN(CCCC)c1ccc(-c2ccc3nc(-c4nc5cc(C(F)(F)F)ccc5o4)[nH]c3c2)cc1	2.72	-6.50707	4.83344	99.2633	0.824972	0.316128	5.08984	0.545913	1.5	0.936866	0.784033	0.287212	0.0429943	2	3.5	-1.28848
CC(C)(C)c1ccc2nc(-c3ccc(-c4ccc(C=C(C#N)C#N)cc4)cc3O)oc2c1	2.721	-7.48717	3.64087	98.9736	-0.339218	0.533228	4.33179	0.706294	2	0.241303	0.974803	0.515188	0.879262	1.5	3.5	-1.39393
COc1ccc(-c2ccc3c(c2)C(=O)c2cccc(O)c2C3=O)cc1-c1ccc(-c2ccc(-c3cc(C(C)(C)C)ccc3O)cc2)cc1	2.723	-9.48122	4.13243	98.9998	0.913608	0.467641	1.54128	1.15593	2.5	0.909741	0.9988	0.916567	0.00390338	1	3.5	-3.04813
CCN(CC)c1ccc2cc(-c3oc4ccc(-c5ccc(C(F)(F)F)cc5)cc4c(=O)c3O)oc2c1	2.724	-5.36943	3.71764	98.4511	0.334676	0.631448	5.93445	0.692289	1.5	0.319147	0.885882	0.454563	0.114869	2	3.5	4.77454
N#CC(C#N)=Cc1ccc(-c2ccc(-c3nc4ccc(C(F)(F)F)cc4o3)c(O)c2)cc1	2.729	-6.9961	4.02198	99.4064	-0.191383	0.36535	3.86377	0.838959	2	0.25394	0.964432	0.448124	0.730745	1.5	3.5	-3.53069
CCN(CC)c1ccc(Oc2cc3cc(-c4nc5cc(-c6ccccc6)ccc5o4)c(O)cc3o2)cc1	2.73	-7.30664	4.00869	98.5395	0.420689	0.687738	3.39446	0.510556	2	0.384084	0.989393	0.70143	0.242189	1.5	3.5	6.57305
CCCCN(CCCC)c1ccc2oc(-c3ccc(NC(F)(F)F)cc3)c(O)c(=O)c2c1	2.735	-5.6509	4.29643	99.0656	-0.0417525	0.402893	5.32708	0.563952	1.5	0.764813	0.722194	0.203725	0.203884	2	3.5	-3.71984
N#CC(C#N)=COc1ccc(-c2oc3ccccc3c(=O)c2O)cc1	2.739	-3.94674	2.49055	97.9376	-0.628886	1.50613	3.51097	0.994736	2	0.0825375	0.997922	0.754032	0.340087	1.5	3.5	-7.48922
CCN(CC)c1ccc(-c2nc3sc(-c4cc(C(F)(F)F)ccc4O)nc3s2)cc1	2.74	-6.6893	3.44343	98.8971	0.234224	0.657126	5.06332	0.774939	1.5	0.116601	0.978834	0.47218	0.549556	2	3.5	0.209435
CCN(CC)c1ccc(-c2ccc3c(c2)C(=O)c2cc(-c4nc5ccc(Oc6ccccc6)cc5o4)cc(O)c2C3=O)cc1	2.74	-9.2179	4.18947	98.6721	0.786979	0.754895	3.13695	0.573329	2	0.607106	0.999642	0.980132	0.189726	1.5	3.5	7.33613
N#CC(=Cc1ccccc1-c1nc2ccccc2s1)c1ccc2cc3ccccc3c(O)c2c1O	2.743	-6.23554	3.98715	99.0449	0.0980738	0.442923	0.823532	0.998055	2	0.153075	0.981297	0.844389	0.686599	1.5	3.5	-3.2062
N#CC(C#N)=Cc1ccc2c(c1)C(=O)c1cc(-c3ccc(C(F)(F)F)cc3)cc(O)c1C2=O	2.751	-7.73818	3.94833	99.4698	0.0150896	0.3228	3.70383	0.950978	2	0.232901	0.998013	0.918282	0.694234	1.5	3.5	2.01768
Cc1cc(-c2ccc(-c3oc4ccc(C=C(C#N)C#N)cc4c(=O)c3O)cc2)cc(C)c1C	2.753	-6.22993	3.09717	98.9475	-0.430786	0.532519	4.24675	0.888315	2	0.183595	0.994408	0.861818	0.562011	1.5	3.5	-4.70806
O=c1c(O)c(-c2nc3ccc(-c4ccc(C(F)(F)F)cc4)cc3[nH]2)oc2ccc(-c3ccc(C(F)(F)F)cc3)cc12	2.756	-5.92669	3.23605	97.2913	0.806823	0.777875	6.03967	0.975993	1.5	0.860418	0.975299	0.161419	0.001411	2	3.5	-3.99529
COc1ccc(-c2ccc3c(c2)C(=O)c2cccc(O)c2C3=O)cc1-c1ccc(-c2ccc(-c3ccc(-c4ccccc4)c(O)c3)c(O)c2)cc1	2.757	-10.6958	5.15519	98.3203	0.694707	0.525794	0.751758	1.35135	2.5	0.937711	0.999556	0.976166	0.00708764	1	3.5	1.99849
CCCCN(CCCC)c1ccc(-c2ccc3oc(-c4nc5cc(-c6ccccc6)ccc5o4)c(O)c(=O)c3c2)cc1	2.758	-5.79747	4.54057	98.9398	0.348107	0.390931	3.3084	0.739741	2	0.894272	0.834439	0.608117	0.125548	1.5	3.5	8.8331
CCN(CC)c1ccc2cc(-c3cc4cc(-c5nc6ccccc6o5)c(O)cc4o3)oc2c1	2.763	-6.32044	4.51836	98.3519	0.281006	1.03858	3.72007	0.556006	2	0.108976	0.935894	0.712189	0.629962	1.5	3.5	5.09162
COc1ccc(-c2ccc3c(c2)C(=O)c2cccc(O)c2C3=O)cc1-c1ccc(-c2cc(-c3ccc(-c4ccccc4)c(O)c3)ccc2O)cc1	2.763	-10.6209	5.14969	98.4634	0.660416	0.505417	0.883109	1.3577	2.5	0.938685	0.99941	0.971714	0.0120607	1	3.5	0.631646
O=Cc1n[nH]c2c1ccc1cccnc12	2.764	-2.40351	2.12934	96.867	0.00628663	3.96016	7.5355	1.33771	2	0.122451	0.947533	0.803663	0.606391	1.5	3.5	-10.1416
CCN(CC)c1ccc2cc(-c3ccc4c(c3)C(=O)c3cc(-c5ccc(C#N)cc5)cc(O)c3C4=O)oc2c1	2.765	-8.60208	4.14933	98.7722	0.80857	0.818811	2.89028	1.01236	2.5	0.56024	0.99886	0.967103	0.599693	1	3.5	5.33063
COc1ccc(C#N)cc1-c1nc2sc(-c3cc(-c4ccccc4O)ccc3O)nc2s1	2.766	-6.0773	3.37692	98.0202	0.155769	1.81521	4.11139	1.17783	2.5	0.397682	0.979595	0.616374	0.761569	1	3.5	3.40647
O=c1c(O)c(-c2cc3cc4c5c(c3o2)CCCN5CCC4)oc2ccccc12	2.767	-4.70684	3.29461	98.6219	-0.262552	1.02853	4.97336	0.394904	2	0.239397	0.805639	0.749523	0.691083	1.5	3.5	2.70405
CCN(CC)c1ccc(-c2cc3cc(-c4nc5cc(-c6nc7ccccc7s6)ccc5o4)c(O)cc3o2)cc1	2.769	-7.42273	4.46922	98.6716	0.503397	0.833858	2.85288	0.582266	2	0.13649	0.994665	0.745738	0.409386	1.5	3.5	-2.05941
CN(C)c1ccc(-c2cc3cc(-c4nc5cc(-c6ccc(-c7nc8ccccc8s7)cc6)ccc5o4)c(O)cc3o2)cc1	2.771	-9.64648	5.29843	99.0604	0.730839	0.66012	2.64769	0.754129	2	0.358643	0.998363	0.793021	0.0970881	1.5	3.5	5.15031
CCN(CC)c1ccc(-c2cc(O)c3c(c2)C(=O)c2cc(-c4nc5cc(C(C)(C)C)ccc5o4)ccc2C3=O)cc1	2.773	-9.2392	4.08875	99.0988	0.750049	0.631874	2.94961	0.93786	2	0.279766	0.998382	0.860217	0.349678	1.5	3.5	5.14377
CCN(CC)c1ccc(-c2ccc3c(c2)C(=O)c2cc(-c4nc5cc(C(C)(C)C)ccc5o4)cc(O)c2C3=O)cc1	2.774	-9.24089	4.0625	99.0365	0.729564	0.6316	4.34201	0.582827	2	0.345088	0.998831	0.883063	0.193413	1.5	3.5	5.6591
N#Cc1cc(=O)oc2c(-c3cc(O)c4c(c3)C(=O)c3ccccc3C4=O)c(O)ccc12	2.776	-6.79005	3.31633	97.5684	0.0829459	2.30967	2.5577	1.3407	2.5	0.201975	0.995178	0.891601	0.74785	1	3.5	3.19659
CCN(CC)c1ccc(-c2nc3sc(-c4cc(-c5nc6ccccc6s5)ccc4O)nc3s2)cc1	2.779	-7.69141	3.53406	98.804	0.455627	0.780181	3.53882	0.707162	2	0.125341	0.998586	0.858235	0.661421	1.5	3.5	0.862085
COc1ccc(-c2ccc3c(c2)C(=O)c2cccc(O)c2C3=O)cc1-c1ccc(-c2ccc(-c3cc(-c4ccccc4)ccc3O)c(O)c2)cc1	2.779	-10.9237	5.25309	98.5298	0.767794	0.463254	0.989361	1.48218	2.5	0.947617	0.999633	0.975231	0.00462245	1	3.5	0.295816
CCN(CC)c1ccc(-c2ccc3c(c2)C(=O)c2cc(-c4nc5cc(C(F)(F)F)ccc5o4)cc(O)c2C3=O)cc1	2.78	-8.53047	3.93826	98.5106	0.970385	0.811444	4.27736	0.657138	2	0.374341	0.998563	0.853384	0.0769274	1.5	3.5	7.15648
N#CC(C#N)=Cc1ccc(-c2ccc(-c3nc4ccc(N(c5ccccc5)c5ccccc5)cc4o3)c(O)c2)cc1	2.785	-8.92152	4.90585	99.527	-0.140882	0.188445	2.65733	0.716102	2	0.168937	0.991983	0.475431	0.99573	1.5	3.5	3.32392
CCN(CC)c1ccc(-c2nc3sc(-c4ccc(N(c5ccccc5)c5ccccc5)cc4O)nc3s2)cc1	2.786	-8.84824	3.76695	99.2023	0.623814	0.43383	3.25391	0.627856	2	0.0767595	0.996215	0.489529	0.992851	1.5	3.5	4.988
N#CC(C#N)=Cc1ccc(-c2ccc3nc(-c4ccc(N(c5ccccc5)c5ccccc5)cc4O)sc3c2)cc1	2.787	-9.31959	4.89029	99.8184	0.0575766	0.156877	2.90291	0.675149	2	0.232823	0.995856	0.654552	0.993214	1.5	3.5	1.76117
CCCCCCc1ccc2oc(-c3cc4cc(-c5ccc(N(CCCC)CCCC)cc5)oc4cc3O)nc2c1	2.787	-7.79452	6.1303	100.159	1.19165	0.160512	2.9851	0.672594	2	0.943309	0.685716	0.116347	0.787627	1.5	3.5	3.4889
COc1ccc(-c2ccc3c(c2)C(=O)c2cccc(O)c2C3=O)cc1-c1ccc(-c2ccc(-c3nc4cc(-c5ccccc5)ccc4o3)cc2)cc1	2.79	-12.0859	5.67499	98.6488	1.21355	0.457354	0.713842	1.31492	2.5	0.931186	0.999904	0.962595	0.0034578	1	3.5	2.68854
N#CC(C#N)=Cc1ccc2nc(-c3ccc4c(c3)C(=O)c3cccc(O)c3C4=O)oc2c1	2.791	-7.77631	3.82949	98.7634	-0.223289	0.794093	2.32823	1.10675	2.5	0.0486188	0.998088	0.964856	0.957575	1	3.5	-5.30572
CCN(CC)c1ccc(-c2cc(O)c3c(c2)C(=O)c2cc(-c4nc5ccc(C(C)(C)C)cc5o4)ccc2C3=O)cc1	2.792	-9.26622	4.10049	98.9853	0.672304	0.673881	3.60425	0.737685	2	0.293222	0.99783	0.867667	0.378679	1.5	3.5	3.1584
CCN(CC)c1ccc(-c2ccc(-c3nc4cc(-c5ccc(-c6nc7ccccc7s6)c(O)c5)ccc4o3)c(O)c2)cc1	2.793	-7.69291	3.6331	98.6347	0.504667	0.68629	2.73996	0.539289	2	0.510954	0.995906	0.830263	0.076022	1.5	3.5	10.2651
N#CC(C#N)=Cc1ccc(-c2ccc3oc(-c4nc5ccccc5o4)c(O)c(=O)c3c2)cc1	2.793	-5.95854	3.47043	98.9936	-0.437658	0.520333	2.83604	1.02693	2.5	0.131547	0.973902	0.870696	0.754662	1	3.5	1.90334
CCN(CC)c1ccc2cc(-c3ccc4c(c3)C(=O)c3cc(-c5ccc(C(F)(F)F)cc5)cc(O)c3C4=O)oc2c1	2.795	-8.79242	4.07696	98.5995	1.18194	0.618458	3.93666	0.832975	2	0.345113	0.997184	0.858617	0.261141	1.5	3.5	3.70042
CCCCN(CCCC)c1ccc(-c2cc3cc(-c4nc5cc(C(F)(F)F)ccc5o4)c(O)cc3o2)cc1	2.795	-7.54102	4.75855	99.2548	0.746628	0.326028	4.18421	0.66963	2	0.71325	0.823988	0.124724	0.435443	1.5	3.5	1.20986
N#Cc1ccc(-c2ccc3nc(-c4cc(O)c5c(c4)C(=O)c4cc(-c6ccc(C(F)(F)F)cc6)ccc4C5=O)sc3c2)cc1	2.795	-10.4335	4.47598	99.8209	1.1382	0.30408	2.9933	1.01201	2.5	0.956824	0.999841	0.908864	0.0144183	1	3.5	2.36168
CCN(CC)c1ccc(-c2cc(O)c3c(c2)C(=O)c2cc(-c4nc5ccc(C(F)(F)F)cc5o4)ccc2C3=O)cc1	2.798	-8.57766	3.92203	98.5837	0.998812	0.816144	3.44968	0.877056	2	0.313004	0.997001	0.836312	0.184177	1.5	3.5	4.43592
CCCCN(CCCC)c1ccc(-c2cc3cc(-c4nc5cc(-c6ccc(-c7ccccc7)cc6)ccc5o4)c(O)cc3o2)cc1	2.798	-10.0053	5.43938	99.3629	0.840071	0.246202	2.76277	0.677946	2	0.942003	0.985301	0.561845	0.102465	1.5	3.5	5.78423
Nc1ccc2nc(-c3ccc4c(c3)C(=O)c3cc(-c5ccc(N(c6ccccc6)c6ccccc6)cc5)cc(O)c3C4=O)oc2c1	2.801	-11.0764	5.42074	98.4195	1.07166	1.06896	0.732417	1.2215	2.5	0.215401	0.999151	0.943702	0.957688	1	3.5	5.12921
CCN(CC)c1ccc(-c2ccc(-c3nc4ccc(-c5ccc(-c6nc7ccccc7s6)c(O)c5)cc4o3)c(O)c2)cc1	2.804	-7.68787	3.6576	98.6396	0.463368	0.684148	2.94976	0.516764	2	0.522814	0.99622	0.843661	0.0937135	1.5	3.5	9.52118
CCN(CC)c1ccc(-c2cc(O)c3c(c2)C(=O)c2cc(-c4nc5ccc(-c6ccc(N)cc6)cc5o4)ccc2C3=O)cc1	2.81	-9.601	4.15792	98.0436	0.856337	1.68994	2.26923	0.931307	2	0.357617	0.999615	0.994065	0.189395	1.5	3.5	4.36046
CCN(CC)c1ccc2cc(-c3cc(O)c4c(ccc5cc(-c6ccc(C(F)(F)F)cc6)cnc54)c3)oc2c1	2.812	-6.96328	3.58708	98.0388	0.862051	0.789042	6.01272	0.515194	1.5	0.559384	0.979409	0.610489	0.0825889	2	3.5	2.09505
Cc1ccc(-c2ccc(-c3ccccc3N)cc2-c2nc3sc(-c4cc(C(C)(C)C)ccc4O)nc3s2)cc1	2.816	-8.76211	3.83184	98.6759	0.603759	1.04098	3.70445	0.982552	2	0.432112	0.997631	0.693774	0.521606	1.5	3.5	-0.976985
CCCCN(CCCC)c1ccc(-c2cc3cc(-c4nc5cc(-c6ccccc6O)ccc5o4)c(O)cc3o2)cc1	2.817	-7.64258	4.479	98.8527	0.300091	0.503013	2.02263	0.834543	2	0.609832	0.809749	0.413696	0.657466	1.5	3.5	5.99555
O=C1c2cc(-c3ccc(-c4nc5ccc(-c6ccc(-c7ccc(-c8ccccc8)c(O)c7)cc6)cc5o4)cc3)ccc2C(=O)c2c(O)cccc21	2.817	-11.8772	5.33467	98.0858	0.945614	0.6407	0.383557	1.34387	2.5	0.897139	0.999876	0.972017	0.00822458	1	3.5	-2.86847
CCN(CC)c1ccc(-c2ccc3c(c2)C(=O)c2cc(-c4ccc(-c5nc6cc(-c7ccccc7)ccc6o5)cc4)cc(O)c2C3=O)cc1	2.82	-10.9443	5.01901	98.6115	1.1084	0.647887	1.40361	1.02683	2.5	0.742667	0.999883	0.980464	0.0221129	1	3.5	2.02927
COc1ccc(C#N)cc1-c1nc2sc(-c3cc(C#N)ccc3O)nc2s1	2.823	-4.89358	3.00499	93.9467	-0.0968263	7.06732	5.68923	1.36726	2.5	0.621684	0.990466	0.58036	0.847174	1	3.5	-3.13264
N#CC(C#N)=Cc1ccc(-c2ccc(-c3ccc4oc(-c5nc6ccccc6[nH]5)c(O)c(=O)c4c3)cc2)cc1	2.824	-6.94614	3.40888	99.1418	-0.343883	0.376783	3.07104	0.953931	2	0.501411	0.997369	0.93071	0.282639	1.5	3.5	-2.09385
COc1ccc(C#N)cc1-c1nc2sc(-c3cc(-c4nc5ccccc5s4)ccc3O)nc2s1	2.824	-7.73352	4.34948	98.0587	0.359071	1.7676	3.75795	1.06988	2.5	0.462196	0.998275	0.713923	0.673365	1	3.5	0.965918
COc1ccc(C#N)cc1-c1nc2sc(-c3cc(-c4nc5ccccc5o4)ccc3O)nc2s1	2.826	-7.05429	4.06697	98.1013	0.312791	1.82475	3.17894	1.30006	2.5	0.388162	0.997434	0.578611	0.74185	1	3.5	3.22756
CCN(CC)c1ccc2cc(-c3cc4cc(-c5nc6cc(-c7ccccc7)ccc6o5)c(O)cc4o3)oc2c1	2.828	-7.96261	4.86969	98.5583	0.525504	0.637166	3.13614	0.648633	2	0.238318	0.96965	0.723799	0.359784	1.5	3.5	5.24915
CCN(CC)c1ccc(-c2ccc3c(c2)C(=O)c2cc(-c4ccc(-c5cc(C)c(C)c(C)c5)cc4O)cc(O)c2C3=O)cc1	2.833	-9.18727	4.00516	98.6232	0.511419	0.763103	3.86349	0.659669	2	0.680937	0.999408	0.984708	0.074342	1.5	3.5	4.68229
CCN(CC)c1ccc(-c2cc3cc(-c4nc5cc(-c6ccccc6)ccc5o4)c(O)cc3o2)s1	2.834	-7.65715	3.97142	98.804	0.507889	0.602562	4.20183	0.567951	2	0.338938	0.996446	0.697335	0.325877	1.5	3.5	9.34029
N#Cc1ccc(C#N)c(-c2nc3sc(-c4ccccc4O)nc3s2)c1	2.835	-5.97812	3.66003	97.4724	-0.0941411	2.40894	4.66493	1.0984	2.5	0.326814	0.992069	0.592281	0.935222	1	3.5	-6.1653
CCN(CC)c1ccc2cc(-c3oc4cc(-c5nc6cc(C)ccc6o5)ccc4c(=O)c3O)oc2c1	2.836	-5.63749	3.67252	98.4131	0.0831791	1.04343	2.77514	0.97259	2	0.11238	0.941059	0.717449	0.582648	1.5	3.5	7.37205
COc1ccc(-c2ccc3c(c2)C(=O)c2cccc(O)c2C3=O)cc1-c1ncc(-c2ccc(-c3cc(-c4ccccc4)ccc3O)cc2)o1	2.836	-9.94498	4.80946	98.3338	0.596552	0.783668	2.08839	1.08029	2.5	0.80547	0.999731	0.962698	0.015298	1	3.5	-1.52897
CCN(CC)c1ccc2cc(-c3ccc4c(c3)C(=O)c3cc(-c5cc(C)c(C)c(C)c5)cc(O)c3C4=O)oc2c1	2.838	-9.46571	4.24083	98.7454	0.87276	0.865948	3.51955	0.745015	2	0.258311	0.99855	0.964921	0.635495	1.5	3.5	2.33502
CCN(CC)c1ccc(-c2ccc3c(c2)C(=O)c2cc(-c4nc5cc(N(CC)CC)ccc5o4)cc(O)c2C3=O)cc1	2.844	-9.02628	4.16522	98.1851	0.760583	1.4085	3.4618	0.55136	2	0.20523	0.998758	0.979801	0.320416	1.5	3.5	6.35274
CCN(CC)c1ccc(-c2cc(O)c3c(c2)C(=O)c2cc(-c4cc5ccc(N(CC)CC)cc5o4)ccc2C3=O)cc1	2.849	-9.28458	4.55697	98.3196	0.845175	1.20862	3.39621	0.57072	2	0.169797	0.998378	0.982303	0.588846	1.5	3.5	4.03686
CCN(CC)c1cc(=O)oc2c(-c3ccc4c(c3)C(=O)c3cccc(O)c3C4=O)c(O)ccc12	2.855	-6.59691	3.85049	97.9065	0.241346	1.70197	1.6222	0.948978	2	0.0856344	0.991749	0.959696	0.578813	1.5	3.5	5.65461
CCN(CC)c1ccc(-c2cc3cc(-c4nc5cc(-c6ccc(-c7nc8ccccc8s7)cc6)ccc5o4)c(O)cc3o2)cc1	2.856	-9.12051	4.86031	98.9297	0.750692	0.658388	2.09365	0.677506	2	0.348101	0.99831	0.803278	0.112321	1.5	3.5	3.52051
CCN(CC)c1ccc(-c2nc3sc(-c4ccc(-c5nc6cc(-c7ccccc7)ccc6o5)cc4O)nc3s2)cc1	2.868	-8.37166	3.94971	98.6913	0.689332	0.9377	2.14366	0.961532	2	0.216482	0.999353	0.778873	0.463384	1.5	3.5	10.1443
CCN(CC)c1ccc(-c2oc3cc(Oc4ccc(-c5nc6ccc(-c7ccccc7)cc6o5)c(O)c4)ccc3c(=O)c2O)cc1	2.87	-5.41191	3.78746	98.3984	0.348915	0.723152	2.17643	0.949865	2	0.40383	0.996798	0.866963	0.111227	1.5	3.5	6.42493
CCN(CC)c1ccc(-c2nc3sc(-c4ccc(-c5ccc(N(c6ccccc6)c6ccccc6)cc5)cc4O)nc3s2)cc1	2.87	-10.0544	3.85011	99.4287	0.761363	0.333144	2.30222	0.725202	2	0.258187	0.999057	0.665868	0.949503	1.5	3.5	9.71081
CCN(CC)c1ccc(-c2ccc(-c3nc4ccc(-c5nc6sc(-c7ccccc7)nc6s5)cc4o3)c(O)c2)cc1	2.878	-8.58405	4.02043	99.0767	0.660665	0.605058	2.68347	0.635364	2	0.243306	0.999793	0.8131	0.661218	1.5	3.5	8.89744
N#CC(C#N)=Cc1ccc(-c2ccc3nc(-c4ccc5oc(-c6ccc(-c7ccccc7)cc6)c(O)c(=O)c5c4)[nH]c3c2)cc1	2.882	-7.66398	3.52602	99.1152	-0.289328	0.279123	2.52994	0.989909	2	0.656185	0.999654	0.956791	0.221874	1.5	3.5	-5.0757
N#CC(C#N)=Cc1ccc(-c2oc3ccc(-c4oc5ccccc5c(=O)c4O)cc3c(=O)c2O)cc1	2.882	-3.9668	2.61561	98.8993	-0.58044	0.432961	2.58057	1.06499	2.5	0.0540258	0.994624	0.824934	0.893667	1	3.5	2.2129
O=C1c2cc(-c3ccc(-c4ccc(-c5ccc(-c6ccc(-c7nc8ccccc8s7)c(O)c6)c(O)c5)cc4)cc3)ccc2C(=O)c2c(O)cccc21	2.891	-12.3958	5.55345	98.7482	0.894248	0.501512	0.473321	1.21055	2.5	0.91345	0.999929	0.987618	0.00338414	1	3.5	-2.03194
CCCCN(CCCC)c1ccc(-c2cc3cc(-c4nc5cc(-c6nc7ccccc7o6)ccc5o4)c(O)cc3o2)cc1	2.895	-8.94607	5.29419	99.0186	0.528494	0.464983	1.90995	0.920278	2	0.651	0.976946	0.358836	0.616321	1.5	3.5	-1.8039
N#CC(C#N)=Cc1ccc(-c2cc(O)c3c(c2)C(=O)c2cc(-c4cc([N+](=O)[O-])ccc4O)ccc2C3=O)cc1	2.896	-8.06815	3.64021	98.9395	-0.204421	0.593507	2.95608	1.04384	2.5	0.22738	0.99996	0.997962	0.982587	1	3.5	2.07413
CNc1ccc(C(C)(C)C)cc1-c1nc2sc(-c3cc(C(C)(C)C)ccc3O)nc2s1	2.91	-7.87831	3.55312	98.3048	0.310515	1.2982	5.96831	0.730591	1.5	0.177563	0.984669	0.168124	0.723054	2	3.5	-8.20696
CCCCN(CCCC)c1ccc(-c2ccc3c(c2)C(=O)c2cc(-c4nc5cc(C(F)(F)F)ccc5o4)cc(O)c2C3=O)cc1	2.911	-9.02389	4.8391	99.6888	1.20096	0.24844	3.41334	0.726134	2	0.894	0.995764	0.674446	0.138894	1.5	3.5	8.22884
CCN(CC)c1ccc(-c2ccc3c(c2)C(=O)c2cc(-c4nc5cc(-c6cc(C)c(C)c(C)c6)ccc5o4)cc(O)c2C3=O)cc1	2.916	-10.5085	4.23513	98.7445	0.881245	0.81736	3.60899	0.627998	2	0.54813	0.999732	0.970374	0.101174	1.5	3.5	7.37157
COc1ccc(-c2ccc[nH]2)cc1-c1nc2sc(-c3cc(-c4ccccc4O)ccc3O)nc2s1	2.925	-6.22647	3.15037	98.0677	0.243925	1.55423	3.81574	0.888699	2	0.304697	0.995564	0.801176	0.191532	1.5	3.5	1.00096
CC(C)(C)c1ccc2oc(-c3cc4cc(-c5ccc(C=C(C#N)C#N)cc5)oc4cc3O)nc2c1	2.927	-7.03692	3.16331	99.1489	-0.28267	0.443646	3.42359	0.975767	2	0.106444	0.989581	0.445768	0.933662	1.5	3.5	4.75714
CCN(CC)c1ccc(-c2ccc(-c3nc4ccc(-c5nc6ccc(-c7cc(-c8ccccc8)ccc7O)cc6o5)cc4o3)c(O)c2)cc1	2.933	-8.33303	4.52426	98.512	0.551731	0.75066	2.43324	0.931931	2	0.666903	0.996137	0.746758	0.0678882	1.5	3.5	5.73631
Oc1ccc(-c2ccc(Cl)cc2-c2cc3c4c(c2)CCCN4CCC3)cc1-c1nc2ccc(-c3ccc(C(F)(F)F)cc3)cc2o1	2.933	-9.67783	4.37875	98.9788	0.931275	0.348028	4.2175	0.572616	2	0.978475	0.996673	0.449067	0.00927861	1.5	3.5	11.6126
CCN(CC)c1ccc(-c2ccc(-c3nc4ccc(-c5nc6scnc6s5)cc4o3)c(O)c2)cc1	2.941	-6.94513	3.32921	98.5707	0.331779	1.03033	3.97818	0.463141	2	0.20476	0.999445	0.837678	0.5255	1.5	3.5	9.55898
Cc1cc(-c2ccc3oc(C=C(C#N)C#N)c(O)c(=O)c3c2)cc(C)c1C	2.941	-5.8903	3.06227	98.5914	-0.418797	0.857834	4.25042	1.01974	2.5	0.15021	0.947264	0.826724	0.811414	1	3.5	-2.94401
CCN(CC)c1ccc(-c2ccc(-c3nc4ccc(C=COC#N)cc4o3)c(O)c2)cc1	2.947	-6.03497	3.44407	98.0292	-0.21921	1.47413	4.37511	0.577734	2	0.244641	0.991287	0.876734	0.414282	1.5	3.5	8.69632
N#CC(C#N)=Cc1cc(=O)oc2c(-c3nc4ccccc4s3)c(O)ccc12	2.949	-5.70526	3.44737	98.6876	-0.521924	0.753202	2.92923	0.87948	2	0.0511269	0.987333	0.861459	0.68455	1.5	3.5	-2.26681
CCN(CC)c1ccc(OC)cc1-c1nc2sc(-c3cc(-c4nc5ccccc5s4)ccc3O)nc2s1	2.949	-7.7146	3.62929	98.8756	0.567874	0.927344	3.99453	0.708482	2	0.220701	0.999046	0.838224	0.488281	1.5	3.5	3.56148
CC(C)(C)c1ccc2nc(-c3cc4cc(-c5ccc(C=C(C#N)C#N)cc5)oc4cc3O)oc2c1	2.949	-7.09099	3.26412	99.1219	-0.295838	0.467749	3.55112	0.947188	2	0.117222	0.986851	0.465332	0.937184	1.5	3.5	4.56751
COc1ccc(-c2ccc[nH]2)cc1-c1nc2sc(-c3cc(C(C)(C)C)ccc3O)nc2s1	2.951	-7.03728	3.40066	98.4422	0.294428	1.40216	5.38006	0.788751	1.5	0.30987	0.99528	0.543862	0.202021	2	3.5	-3.18651
N#CC(C#N)=Cc1ccc2nc(-c3ccc(-c4nc5ccc([N+](=O)[O-])cc5o4)c(O)c3)oc2c1	2.958	-6.41054	3.52249	98.835	-0.358172	0.803407	2.88517	1.01862	2.5	0.0857057	0.999678	0.938188	0.987629	1	3.5	2.29352
CCN(CC)c1ccc(-c2nc3sc(-c4ccc(-c5ccc(-c6nc7ccc(-c8ccccc8)cc7o6)c(O)c5)cc4)nc3s2)cc1	2.966	-9.89055	4.59633	99.307	0.82633	0.474349	2.09596	0.78997	2	0.537316	0.999915	0.86691	0.149491	1.5	3.5	6.3734
COc1ccc(-c2ccc3c(c2)C(=O)c2cccc(O)c2C3=O)cc1-c1ncc(-c2ccc(-c3cc(-c4ccccc4)ccc3O)c(O)c2)o1	2.973	-9.39406	4.6413	98.305	0.520718	0.889188	0.843202	1.64312	2.5	0.750151	0.999687	0.965435	0.0157719	1	3.5	-1.21984
N#CC(C#N)=Cc1cc(=O)oc2c(-c3nc4ccccc4o3)c(O)ccc12	2.979	-4.82649	3.17948	98.2419	-0.533407	1.15256	2.52483	0.944942	2	0.0538583	0.982021	0.789703	0.535787	1.5	3.5	-0.382171
COc1ccc(-c2ccc3c(c2)C(=O)c2cccc(O)c2C3=O)cc1-c1ncc(-c2cc(-c3ccc(-c4ccccc4)c(O)c3)ccc2O)o1	2.979	-9.42648	4.65113	98.1956	0.52592	0.992609	0.949861	1.49025	2.5	0.782213	0.999277	0.963119	0.0146535	1	3.5	0.560784
N#CC(C#N)=Cc1ccc(-c2ccc3c(c2)C(=O)c2cc(-c4nc5cc([N+](=O)[O-])ccc5o4)cc(O)c2C3=O)cc1	2.979	-9.02673	3.92717	99.186	-0.112973	0.553663	2.61959	1.02079	2.5	0.213083	0.999992	0.996237	0.985619	1	3.5	-2.26197
CCN(CC)c1ccc(-c2cc(O)c3c(c2)C(=O)c2cc(OC=C(C#N)C#N)ccc2C3=O)cc1	2.987	-7.85658	4.00771	97.9181	-0.231781	1.4374	3.91529	0.726546	2	0.14036	0.999893	0.983007	0.380795	1.5	3.5	5.73711
CCN(CC)c1ccc(-c2cc3cc(-c4nc5cc(C(C)(C)C)ccc5o4)c(O)cc3o2)s1	2.99	-7.95896	4.0406	99.2273	0.372858	0.658122	5.52344	0.567333	1.5	0.222868	0.992018	0.359987	0.517388	2	3.5	10.1502
N#CC(=Cc1ccc2nc(-c3ccccc3)oc2c1)c1ccc(-c2cnc3c(ccc4cc(NC=O)cc(O)c43)c2)cc1	2.993	-6.37007	4.2855	98.6414	0.11814	0.800887	1.59389	0.971438	2	0.442648	0.99988	0.967123	0.176795	1.5	3.5	-7.68971
CCCCN(CCCC)c1ccc(-c2cc3cc(-c4nc5cc(-c6ccc(-c7nc8ccccc8s7)cc6)ccc5o4)c(O)cc3o2)cc1	2.994	-10.9082	5.22067	99.6399	0.815846	0.290938	1.68421	0.804228	2	0.888367	0.995174	0.599514	0.184113	1.5	3.5	4.50173
CCN(CC)c1ccc(-c2ccc(-c3nc4ccc(-c5nc6sc(OC)nc6s5)cc4o3)c(O)c2)cc1	2.995	-7.87327	3.91168	98.6812	0.326904	0.908065	3.02744	0.727664	2	0.160789	0.999684	0.816979	0.558823	1.5	3.5	7.28973
CCN(CC)c1ccc(-c2cccc(O)c2)cc1-c1nc2sc(-c3cc(C(C)(C)C)ccc3O)nc2s1	2.999	-8.00802	3.49782	98.814	0.226998	0.918897	4.37069	0.82703	2	0.286735	0.979699	0.507501	0.722583	1.5	3.5	-2.16675
CC(C)(C)c1ccc(O)c(-c2nc3sc(-c4ccc(C=C(C#N)C#N)cc4)nc3s2)c1	3.004	-7.58264	3.49222	99.5633	-0.178467	0.365271	3.78246	0.990562	2	0.0716051	0.995968	0.624074	0.982505	1.5	3.5	-7.64325
COc1ccc(C#N)cc1-c1nc2sc(C(=O)c3ccc4cccc(O)c4c3O)nc2s1	3.008	-5.68805	3.44719	97.3021	-0.00372159	2.98466	1.16837	1.53402	2.5	0.214037	0.999103	0.854922	0.927319	1	3.5	1.76622
CCN(CC)c1ccc2cc(-c3cc(O)c4c(c3)C(=O)c3cc(-c5nc6cc(C(C)(C)C)ccc6o5)ccc3C4=O)oc2c1	3.013	-9.07609	4.2363	99.2903	0.880469	0.573481	1.7827	1.25611	2.5	0.156564	0.998721	0.795137	0.700158	1	3.5	4.10806
CCN(CC)c1ccc(-c2ccc(-c3nc4ccc(-c5nc6sc(-c7ccccc7O)nc6s5)cc4o3)c(O)c2)cc1	3.014	-7.99222	3.42947	98.8164	0.407295	0.696409	2.52703	0.754463	2	0.125728	0.9994	0.813478	0.675897	1.5	3.5	5.34582
O=C1c2cc(-c3ccc(-c4nc5ccc(-c6nc7ccc(-c8ccc(-c9ccccc9)c(O)c8)cc7o6)cc5o4)cc3)ccc2C(=O)c2c(O)cccc21	3.022	-12.3246	5.5813	98.4569	0.93835	0.77936	0.240859	1.54597	2.5	0.729457	0.999892	0.94642	0.0494175	1	3.5	-0.635753
CCN(CC)c1ccc(C(C)(C)C)cc1-c1nc2sc(-c3cc(C(C)(C)C)ccc3O)nc2s1	3.025	-8.60568	4.02668	98.9049	0.405548	0.756267	5.83814	0.597725	1.5	0.173841	0.966268	0.183812	0.762897	2	3.5	-4.94075
CCCCN(CCCC)c1ccc2cc(-c3cc4cc(-c5nc6cc(C(F)(F)F)ccc6o5)c(O)cc4o3)oc2c1	3.048	-8.73647	5.1752	99.2881	0.806307	0.331346	3.48895	0.802682	2	0.75082	0.792162	0.153574	0.459342	1.5	3.5	6.8157
COc1ccc(-c2ccc3c(c2)C(=O)c2cccc(O)c2C3=O)cc1-c1nc2ccc(-c3cc(-c4cc(-c5ccccc5)ccc4O)ccc3O)cc2o1	3.054	-10.2859	4.83027	98.3496	0.536826	0.859159	1.89743	1.26383	2.5	0.861667	0.999776	0.959386	0.0264321	1	3.5	1.47759
CCN(CC)c1ccc(-c2nc3ccccc3o2)cc1-c1nc2sc(-c3cc(C(C)(C)C)ccc3O)nc2s1	3.059	-8.73202	3.98274	98.8612	0.474411	0.836396	3.21921	0.973575	2	0.128568	0.994471	0.374214	0.83067	1.5	3.5	4.17764
CCN(CC)c1ccc(-c2ccc3c(c2)C(=O)c2cc(-c4nc5cc(C=C(C#N)C#N)ccc5o4)cc(O)c2C3=O)cc1	3.062	-8.69566	4.32405	98.9704	-0.150808	0.594935	3.20135	0.83424	2	0.152997	0.999867	0.988416	0.582138	1.5	3.5	6.77637
N#CC(C#N)=Cc1ccc(-c2ccc(-c3oc4ccc(-c5nc6ccc(-c7ccc(C(F)(F)F)cc7)cc6[nH]5)cc4c(=O)c3O)cc2)cc1	3.064	-8.04325	3.48057	99.558	-0.126104	0.176532	2.43051	1.12474	2.5	0.788379	0.999619	0.843098	0.0535232	1	3.5	-0.841844
CCCCN(CCCC)c1ccc2cc(-c3oc4ccc(-c5nc6cc(-c7cccc(O)c7)ccc6o5)cc4c(=O)c3O)oc2c1	3.078	-6.2013	4.5588	98.7162	0.147867	0.696042	1.41871	1.40018	2.5	0.773851	0.895537	0.493303	0.525994	1	3.5	7.73776
CCN(CC)c1ccc(N(CC)CC)c(-c2nc3sc(-c4ccc(-c5ccc(C(F)(F)F)cc5)cc4O)nc3s2)c1	3.105	-8.84605	3.69653	98.9844	0.642538	0.499217	4.77012	0.628093	2	0.325021	0.994686	0.628238	0.469084	1.5	3.5	2.74882
CC(C)(C)c1ccc(O)c(-c2nc3sc(-c4ccc(-c5cc(C#N)ccc5-c5cccc6ccc7cccnc7c56)cc4)nc3s2)c1	3.144	-9.53094	3.52079	99.4746	0.515022	0.44024	2.50986	1.24993	2.5	0.889087	0.999912	0.833154	0.251828	1	3.5	-4.3863
CCN(CC)c1ccc(-c2cc3cc(-c4nc5ccc(-c6ccc(-c7nc8ccc(-c9ccccc9)cc8o7)c(O)c6)cc5o4)c(O)cc3o2)cc1	3.16	-9.0991	4.91921	98.7205	0.642419	0.570048	1.46475	0.854811	2	0.437307	0.998785	0.708468	0.182472	1.5	3.5	3.24372
CCN(CC)c1ccc(-c2ccc[nH]2)cc1-c1nc2sc(-c3cc(C(C)(C)C)ccc3O)nc2s1	3.172	-7.65052	3.70121	98.8902	0.346841	0.928527	5.47149	0.573932	1.5	0.255733	0.995081	0.671606	0.436416	2	3.5	4.48657
CCN(CC)c1ccc(-c2nc3sc(-c4ncc(-c5ccc(-c6nc7ccc(-c8ccccc8)cc7o6)c(O)c5)o4)nc3s2)cc1	3.193	-8.41522	4.13083	98.605	0.532866	0.858845	2.07684	0.937449	2	0.217827	0.99986	0.8209	0.598141	1.5	3.5	4.03739
CCN(CC)c1ccc(-c2ccc[nH]2)cc1-c1nc2sc(-c3cc(-c4nc5ccccc5o4)ccc3O)nc2s1	3.196	-7.51332	3.66343	98.3167	0.571192	1.4206	2.99434	0.815762	2	0.243685	0.999427	0.855116	0.394359	1.5	3.5	8.94337
CCCCN(CCCC)c1ccc(-c2cc3cc(-c4nc5cc(-c6nc7cc(-c8nc9ccccc9s8)ccc7o6)ccc5o4)c(O)cc3o2)cc1	3.207	-11.1999	5.81787	99.5682	0.797128	0.357188	0.820182	1.17454	2.5	0.735251	0.997875	0.451298	0.402826	1	3.5	-0.989146
CCN(CC)c1ccc(N(C)C)cc1-c1nc2sc(C(=O)c3ccc4cccc(O)c4c3O)nc2s1	3.227	-6.22417	3.28214	98.537	0.248095	1.35963	1.41296	1.254	2.5	0.0428108	0.998981	0.941761	0.953373	1	3.5	2.38984
CCN(CC)c1ccc(-c2cc3cc(-c4nc5cc(-c6nc7cc(C=C(C#N)C#N)ccc7o6)ccc5o4)c(O)cc3o2)cc1	3.231	-7.19629	3.67467	99.1651	-0.278806	0.445621	2.09994	1.04536	2.5	0.057901	0.99908	0.816457	0.795917	1	3.5	-2.2666
CCN(CC)c1ccc(-c2nc3sc(-c4nc5ccc(-c6ccc(-c7nc8ccc(-c9ccccc9)cc8o7)c(O)c6)cc5o4)nc3s2)cc1	3.254	-9.72268	4.90372	98.8641	0.560657	0.632541	1.62359	1.00312	2.5	0.421569	0.999884	0.826773	0.532477	1	3.5	3.37872
N#CC(C#N)=Cc1ccc(-c2ccc3c(c2)C(=O)c2cc(-c4nc5cc(C=C(C#N)C#N)ccc5o4)cc(O)c2C3=O)cc1	3.266	-9.29481	4.09879	98.4255	-0.411821	0.675708	2.26726	1.0556	2.5	0.110753	0.999973	0.992323	0.96406	1	3.5	0.614939
N#CC(C#N)=Cc1ccc(-c2ccc3c(c2)C(=O)c2cc(-c4nc5ccc(C=C(C#N)C#N)cc5o4)cc(O)c2C3=O)cc1	3.278	-9.31682	4.07736	98.4471	-0.408253	0.682832	2.33507	1.03046	2.5	0.111431	0.999974	0.993574	0.980021	1	3.5	0.986768
N#CC(C#N)=Cc1ccc(-c2ccc3c(c2)C(=O)c2cc(-c4cc5cc(N(c6ccccc6)c6ccccc6)c(O)cc5o4)cc(O)c2C3=O)cc1	3.286	-11.5899	5.43466	99.3343	-0.0188649	0.306794	1.06313	1.1683	2.5	0.211045	0.999902	0.940582	0.990906	1	3.5	6.86794
CCN(CC)c1ccc(-c2nc3sc(-c4nc5ccc(-c6nc7sc(-c8ccccc8O)nc7s6)cc5o4)nc3s2)cc1	3.353	-9.16761	4.50462	98.8472	0.446551	0.689105	1.86964	1.0537	2.5	0.0449027	0.999967	0.871518	0.970626	1	3.5	0.973505
CC(C)(C)c1ccc(O)c(-c2nc3sc(-c4cc(-c5ccc(N)cc5)ccc4C4=Nc5ccc6ccccc6c5C4(C)C)nc3s2)c1	3.365	-9.12447	3.47817	98.9285	0.747184	0.691185	3.14673	1.00224	2.5	0.484525	0.999317	0.905413	0.45977	1	3.5	-4.04269
CCN(CC)c1cc2n(c1-c1cc3cc(-c4nc5ccc(-c6ccc(NC)cc6)cc5s4)c(O)cc3o1)CC=C2	3.391	-7.47734	3.64133	98.9815	0.350265	0.745943	4.36349	0.451742	2	0.665587	0.997171	0.947918	0.137969	1.5	3.5	-0.00637393
CCN(CC)c1ccc(-c2nc3sc(-c4nc5ccc(-c6nc7sc(-c8cc(-c9ccccc9)ccc8O)nc7s6)cc5o4)nc3s2)cc1	3.415	-10.6275	4.49999	99.323	0.749504	0.535152	1.53561	1.18524	2.5	0.204961	0.999982	0.87311	0.8846	1	3.5	0.640548
CCN(CC)c1ccc(-c2nc3scnc3s2)cc1-c1nc2sc(-c3cc(C(C)(C)C)ccc3O)nc2s1	3.441	-8.04353	3.31041	99.154	0.618488	0.695927	3.54717	0.919333	2	0.116424	0.999839	0.626492	0.893651	1.5	3.5	4.79335
CCN(CC)c1ccc(-c2nc3scnc3s2)cc1-c1nc2sc(-c3cc(-c4nc5ccccc5o4)ccc3O)nc2s1	3.453	-8.67223	3.77466	98.9042	0.850775	0.902136	1.655	1.08208	2.5	0.10997	0.999981	0.828785	0.876022	1	3.5	14.1884
CC1(C)C(c2ccc(-c3ccc[nH]3)cc2-c2nc3sc(-c4cc(-c5ccccc5O)ccc4O)nc3s2)=Nc2c1ccc1ccccc21	3.495	-8.65133	3.81864	99.3626	0.548332	0.401259	2.11581	0.890868	2	0.567666	0.9994	0.878914	0.221085	1.5	3.5	-2.64512
CC1(C)C(c2ccc(-c3ccc[nH]3)cc2-c2nc3sc(-c4cc(-c5nc6ccccc6s5)ccc4O)nc3s2)=Nc2c1ccc1ccccc21	3.551	-10.7083	4.71322	99.6216	0.754039	0.410506	2.02921	0.878045	2	0.630882	0.999951	0.918492	0.154527	1.5	3.5	0.156363
CC1(C)C(c2ccc(-c3nc4scnc4s3)cc2-c2nc3sc(-c4cc([N+](=O)[O-])ccc4O)nc3s2)=Nc2ccc3ccccc3c21	3.719	-9.76388	4.29415	98.9725	0.702923	0.731813	1.81982	1.0594	2.5	0.208772	0.999999	0.984241	0.989675	1	3.5	2.24443
CC1=N[C@H](c2ccc(C(C)(C)C)cc2-c2nc3sc(-c4cc(C(C)(C)C)ccc4O)nc3s2)C(=O)N1C	3.868	-6.1332	4.03468	97.1141	0.044917	2.26367	5.51736	0.954742	1.5	0.253437	0.984237	0.032816	0.939708	2	3.5	3.19135
O=C(Nc1ccccc1-c1ccccc1)c1ccccc1O	1.534	-3.40148	3.06805	98.8211	-0.583843	0.423844	3.99539	0.562047	2	0.400604	0.895555	0.49602	0.875424	1	3	-9.85968
O=C(Nc1ccccc1-c1ccccn1)c1ccccc1	1.565	-3.65529	2.69121	97.5158	-0.146187	2.28299	3.35329	0.85492	2	0.624302	0.959779	0.622991	0.876481	1	3	-8.98097
O=C(c1ccccc1)c1ccc(-c2ccccc2)cc1O	1.574	-4.92247	3.83615	98.0591	-0.192207	0.872504	6.03522	0.845441	1.5	0.352822	0.804356	0.555213	0.381473	1.5	3	-6.94257
N#Cc1ccc(NC(=O)c2ccccc2O)cc1	1.629	-3.56284	2.92722	97.8391	-0.391834	1.64872	4.36082	0.839863	2	0.601746	0.893193	0.631932	0.865197	1	3	-6.21155
O=C(Nc1ccc(Cl)cc1-c1ccccc1)c1ccccc1O	1.675	-5.32404	3.48059	99.4144	-0.713426	0.196226	3.78893	0.565945	2	0.564348	0.951806	0.396558	0.805797	1	3	-7.44924
N#Cc1ccccc1NC(=O)c1ccccc1O	1.698	-3.71723	2.65228	98.5019	-0.530796	1.1774	3.7023	0.831783	2	0.303667	0.813066	0.466647	0.977494	1	3	-6.75381
O=C(Nc1ccccc1-c1nc2ccccc2s1)c1ccccc1	1.717	-5.63908	3.74515	97.9827	0.135815	1.13003	2.82168	0.59421	2	0.557265	0.989535	0.645169	0.859807	1	3	-6.42957
O=C(Nc1ccccc1-c1nc2ccccc2[nH]1)c1ccccc1	1.733	-4.5699	3.14082	97.6589	-0.0182097	1.93805	2.52594	0.834009	2	0.679257	0.98082	0.695687	0.801729	1	3	-7.20815
CC(C)(C)c1ccc(O)c(C(=O)Nc2ccc(Cl)cc2)c1	1.752	-6.08392	3.94409	98.8471	-0.277668	0.716842	5.97727	0.420433	1.5	0.493057	0.860644	0.205317	0.87813	1.5	3	-4.2691
O=C(Nc1ccccc1-c1ccccn1)c1ccccc1O	1.752	-3.77899	2.92468	99.1517	-0.732856	0.442975	3.39569	0.617952	2	0.383678	0.904142	0.659774	0.901915	1	3	-8.38216
O=C(Nc1ccc(Cl)cc1-c1nc2ccccc2o1)c1ccccc1	1.847	-5.62292	3.99446	98.5841	-0.319971	0.675095	1.75968	0.954133	2	0.61928	0.989929	0.359317	0.828963	1	3	-6.05333
N#Cc1cc(Cl)ccc1NC(=O)c1ccccc1O	1.847	-5.27739	3.184	98.8446	-0.468829	0.634689	3.86016	0.821858	2	0.443576	0.896727	0.340541	0.978084	1	3	-5.99596
O=C(Nc1ccc([N+](=O)[O-])cc1)c1nc2ccccc2s1	1.892	-4.60005	3.08137	97.5616	-0.079761	2.54497	3.29027	0.644712	2	0.287204	0.999122	0.973017	0.97401	1	3	-7.71884
O=C(Nc1ccc2nc(-c3ccccc3O)oc2c1)c1ccccc1	1.913	-4.93622	3.62271	98.5342	-0.439466	0.779897	1.64725	0.965713	2	0.397924	0.980349	0.599687	0.758766	1	3	-5.42295
O=C(Nc1ccc(C(F)(F)F)cc1)c1nc2ccccc2s1	1.919	-5.49699	3.96274	98.5214	0.246977	0.799337	6.04903	0.482652	1.5	0.345466	0.961967	0.533538	0.468845	1.5	3	-10.4112
COc1ccc(-c2ccc(-c3oc4ccccc4c(=O)c3O)cc2)cc1	1.92	-4.56139	2.91836	98.5668	-0.336467	0.599939	5.19447	0.695413	1.5	0.400971	0.959432	0.724512	0.104822	1.5	3	-4.6279
O=C(Nc1ccc(Cl)cc1-c1ccccc1)c1nc2ccccc2s1	1.924	-5.5249	3.94284	99.065	-0.185568	0.382049	3.39542	0.594885	2	0.514366	0.990448	0.730464	0.526611	1	3	-8.83296
COc1ccc(-c2ccc(-c3nc4ccccc4s3)c(O)c2)cc1	1.946	-5.78876	3.72497	98.4839	0.180396	1.06184	6.07614	0.40976	1.5	0.426051	0.946577	0.74595	0.190247	1.5	3	-3.69541
CNC(=O)c1nc2ccccc2s1	1.963	-2.21755	1.50499	95.416	0.116025	4.44279	5.95902	0.638156	1.5	0.0851585	0.880079	0.771099	0.557858	1.5	3	-7.37707
O=C(Nc1ccccc1-c1oc2ccccc2c(=O)c1O)c1ccccc1	1.971	-3.8456	2.44355	98.4748	-0.463602	0.675162	2.2602	0.982097	2	0.416293	0.990381	0.543279	0.867657	1	3	-4.43346
CN(C)c1ccc(NC(=O)c2nc3ccccc3o2)cc1	1.978	-3.96931	3.28205	97.5955	0.0496586	2.08874	5.32575	0.447835	1.5	0.234005	0.93678	0.836119	0.465461	1.5	3	-3.08789
Oc1cc(-c2ccc(-c3ccccc3)cc2)ccc1-c1nc2ccccc2[nH]1	1.988	-5.76556	3.82441	97.8317	0.288359	1.01336	4.60048	0.644473	2	0.762988	0.967721	0.864088	0.0871585	1	3	-2.16688
O=C1c2ccccc2C(=O)c2c(O)cc(-c3ccc(-c4ccccc4)cc3)cc21	1.989	-8.40016	4.40407	97.9319	0.5507	1.02772	4.18379	0.714854	2	0.479432	0.991675	0.925997	0.314357	1	3	1.31463
CN(C)c1ccccc1NC(=O)c1nc2ccccc2[nH]1	2.034	-3.70306	3.1584	97.2192	-0.239376	2.53306	5.90736	0.597777	1.5	0.132541	0.758954	0.847959	0.635509	1.5	3	-3.90664
CN(C)c1ccc(-c2oc3ccccc3c(=O)c2O)cc1	2.038	-4.20405	2.4202	98.2829	-0.37551	1.06641	6.20848	0.680778	1.5	0.0938733	0.814429	0.720755	0.515763	1.5	3	-3.54312
Nc1ccc(-c2ccc(O)c(-c3nc4ccccc4o3)c2)cc1	2.039	-4.68254	3.30855	97.645	0.164877	2.48871	5.37027	0.811275	1.5	0.236225	0.915044	0.864665	0.355565	1.5	3	-2.25453
O=C(Nc1ccc(Cl)cc1[N+](=O)[O-])c1nc2ccccc2s1	2.041	-4.86934	3.20503	99.3324	-0.339092	0.376647	3.23549	0.681676	2	0.265211	0.998283	0.892488	0.963487	1	3	-3.43818
O=C1c2cc(-c3ccc(-c4ccc(-c5ccccc5)cc4)cc3)ccc2C(=O)c2c(O)cccc21	2.045	-10.1104	4.91749	97.735	0.725028	0.768581	2.66351	0.79705	2	0.816522	0.99856	0.97361	0.0124418	1	3	-1.45641
O=c1c(O)c(-c2ccc(-c3ccc(-c4ccccc4)cc3)cc2)oc2ccc(-c3ccccc3)cc12	2.046	-7.5702	4.05233	97.4351	0.152867	0.608997	3.8863	0.799149	2	0.78397	0.992421	0.75763	0.012278	1	3	-3.04351
O=c1c(O)c(-c2ccccc2)oc2ccc(-c3ccc(-c4ccc(-c5ccccc5)cc4)cc3)cc12	2.046	-7.83985	4.17056	97.472	0.140764	0.595853	3.74171	0.779867	2	0.824637	0.997318	0.753785	0.00625912	1	3	-5.32827
O=c1c(O)c(-c2ccc(-c3ccc([N+](=O)[O-])cc3)cc2)oc2ccccc12	2.065	-4.93679	2.96374	98.3206	-0.324035	0.927454	3.7988	0.840872	2	0.393585	0.997365	0.941225	0.626382	1	3	-2.91865
Cc1ccc(-c2ccc(-c3cnc4c(ccc5cccc(O)c54)c3)cc2)cc1	2.079	-6.09112	4.11393	98.0205	0.314227	0.680458	5.56803	0.458844	1.5	0.664898	0.96644	0.869243	0.0619877	1.5	3	-6.95735
Oc1ccc(-c2ccc(-c3ccc(-c4ccccc4)cc3)cc2)cc1-c1nc2ccccc2s1	2.079	-9.81366	5.6327	98.3577	0.644383	0.603499	4.33247	0.558855	2	0.882763	0.991657	0.818966	0.00822969	1	3	-3.63208
Oc1cc(-c2ccc(-c3ccc(-c4ccccc4)cc3)cc2)ccc1-c1nc2ccccc2s1	2.088	-9.68381	5.58051	98.1918	0.618407	0.634038	4.07875	0.534453	2	0.874705	0.994387	0.844166	0.00774376	1	3	-2.07818
Oc1ccccc1-c1nc2ccc(-c3ccc(-c4ccc(-c5ccccc5)cc4)cc3)cc2s1	2.092	-9.79694	5.6499	98.5602	0.642367	0.450365	3.74417	0.55801	2	0.838919	0.993438	0.852483	0.00765993	1	3	-4.84466
O=c1c(O)c(-c2ccc(-c3ccccc3)cc2)oc2ccc(-c3ccc(-c4ccc(-c5ccccc5)cc4)cc3)cc12	2.097	-8.59673	4.2772	97.0403	0.332403	0.64628	3.27059	0.798517	2	0.937395	0.998573	0.841682	0.00126771	1	3	-3.68085
O=c1c(O)c(-c2ccc(-c3ccc(-c4ccccc4)cc3)cc2)oc2ccc(-c3ccc(-c4ccccc4)cc3)cc12	2.097	-8.59673	4.2772	97.0793	0.334191	0.629063	3.27059	0.798517	2	0.937312	0.998523	0.839695	0.00138909	1	3	-2.76318
CNc1ccc(-c2cc(O)c3c(c2)C(=O)c2ccccc2C3=O)cc1	2.105	-7.2645	3.68434	97.4026	0.407344	2.54812	5.57551	0.673204	1.5	0.23137	0.989203	0.944661	0.65916	1.5	3	0.992411
Oc1cc(-c2ccc(-c3ccc(-c4ccccc4)cc3)cc2)ccc1-c1nc2ccccc2[nH]1	2.107	-7.83426	4.64273	97.356	0.427284	1.06267	3.90755	0.644253	2	0.92379	0.9929	0.908352	0.011542	1	3	-1.00538
CN(C)c1ccc(-c2cc(O)c3c(c2)C(=O)c2ccccc2C3=O)cc1	2.117	-7.33316	3.83317	98.2031	0.452681	1.38683	5.61261	0.61245	1.5	0.176126	0.97827	0.94387	0.667065	1.5	3	3.61491
O=C(Nc1ccc(Cl)cc1C(F)(F)F)c1nc2ccccc2[nH]1	2.121	-5.11685	3.85514	98.9627	-0.117513	0.547194	5.11996	0.824313	1.5	0.341512	0.778751	0.454722	0.33921	1.5	3	-7.89045
CN(C)c1ccc(-c2ccc(-c3nc4ccccc4[nH]3)c(O)c2)cc1	2.124	-3.8618	3.18599	98.3772	0.147906	1.04535	6.0653	0.502825	1.5	0.426967	0.918957	0.896048	0.294975	1.5	3	2.98813
O=C1c2cc(-c3ccc(C(F)(F)F)cc3)ccc2C(=O)c2c(O)cccc21	2.131	-7.08206	3.81425	97.952	0.973177	0.939431	5.03676	0.893073	1.5	0.386381	0.967841	0.78684	0.134279	1.5	3	1.02624
CCN(CC)c1ccc(-c2oc3ccccc3c(=O)c2O)cc1	2.135	-4.66865	3.35223	98.1885	-0.32761	1.24953	5.6495	0.501349	1.5	0.0862717	0.802656	0.732224	0.575693	1.5	3	-4.68603
O=C(Nc1ccccc1-c1ccccc1)c1ccc2cc3ccccc3c(O)c2c1O	2.141	-4.16369	3.43254	98.3541	-0.109762	0.42349	1.12076	0.901972	2	0.467719	0.9744	0.743159	0.645971	1	3	-3.66875
O=C1c2ccccc2C(=O)c2c(O)cc(-c3ccc(C(F)(F)F)cc3)cc21	2.143	-7.09328	3.78208	97.7225	0.945285	1.30108	6.03851	0.805193	1.5	0.34112	0.963088	0.670254	0.363275	1.5	3	-0.0333404
Oc1cc(-c2ccc(-c3ccc(-c4ccccc4)cc3)cc2)ccc1-c1nc2ccc(-c3ccccc3)cc2o1	2.165	-10.6243	6.14267	97.2753	0.499365	0.874904	3.47104	0.607053	2	0.934249	0.996991	0.76201	0.00473495	1	3	-0.849684
O=C1c2cc(-c3ccc(Nc4ccc(-c5ccccc5)cc4)cc3)ccc2C(=O)c2c(O)cccc21	2.172	-9.68347	4.44245	98.2401	0.621702	0.599845	1.89118	0.798723	2	0.818812	0.999671	0.982355	0.029981	1	3	-1.11052
CNc1ccc(C#N)cc1-c1nc2ccccc2s1	2.177	-4.85246	3.42115	97.5525	0.271488	2.37205	6.30437	0.593188	1.5	0.425903	0.899391	0.691038	0.692787	1.5	3	-6.39468
O=C1c2cc(-c3ccc(-c4ccc([N+](=O)[O-])cc4)cc3)ccc2C(=O)c2c(O)cccc21	2.178	-8.54267	3.89584	97.6167	0.571479	1.74654	2.53717	0.878501	2	0.636813	0.999815	0.994994	0.402649	1	3	0.588454
CN(C)c1ccc(-c2ccc3oc(-c4ccc(-c5ccccc5)cc4)c(O)c(=O)c3c2)cc1	2.19	-5.70357	3.30335	98.6627	-0.00257987	0.360383	5.20794	0.664745	1.5	0.476761	0.98263	0.820813	0.0435034	1.5	3	5.03716
O=c1c(O)c(-c2ccc(-c3ccc(-c4ccc(C(F)(F)F)cc4)cc3)cc2)oc2ccccc12	2.191	-6.27426	3.59242	97.0251	0.495496	0.935097	5.07414	0.831427	1.5	0.764095	0.978586	0.425188	0.00607721	1.5	3	-5.47918
CNc1ccc(C#N)cc1-c1nc2ccccc2o1	2.193	-4.25128	3.36368	95.4384	0.115922	3.73353	5.47258	0.889516	1.5	0.377133	0.803017	0.52975	0.645039	1.5	3	-4.73264
CCN(CC)c1ccc(-c2ccc(-c3nc4ccccc4o3)c(O)c2)cc1	2.193	-5.91001	3.66628	98.2192	0.0386933	1.19198	5.32326	0.333654	1.5	0.229268	0.899571	0.711085	0.32617	1.5	3	9.26061
O=C1c2cc(-c3cc4ccccc4o3)ccc2C(=O)c2c(O)cccc21	2.196	-7.11968	3.87051	97.8817	0.419662	1.23124	2.83007	0.981438	2	0.0981215	0.982055	0.911962	0.7611	1	3	-2.66007
CN(C)c1ccc(-c2ccc(-c3nc4cc(-c5ccccc5)ccc4o3)c(O)c2)cc1	2.2	-5.97481	4.3716	98.5289	0.241296	0.662171	5.06583	0.520833	1.5	0.448511	0.958673	0.714082	0.119873	1.5	3	11.5169
COc1ccc(-c2ccc(-c3nc4ccc(-c5ccc(-c6ccccc6)cc5)cc4o3)c(O)c2)cc1	2.206	-8.06117	5.05416	98.2112	0.457591	0.684748	4.35102	0.559709	2	0.862597	0.99394	0.7444	0.0163556	1	3	5.66454
CCN(CC)c1ccc(-c2cc(O)c3c(c2)C(=O)c2ccccc2C3=O)cc1	2.215	-7.44757	4.34864	97.5879	0.61411	2.25322	5.12044	0.451523	1.5	0.167279	0.978424	0.948902	0.698275	1.5	3	3.47768
O=C(Nc1ccc(Cl)cc1-c1nc2ccccc2[nH]1)c1nc2ccccc2s1	2.216	-5.90267	4.40141	99.0488	-0.236833	0.406286	2.62896	0.680777	2	0.605058	0.996301	0.850965	0.627955	1	3	-12.3569
CCN(CC)c1ccc(-c2oc3cc(OC)ccc3c(=O)c2O)cc1	2.218	-4.73899	3.29933	97.5987	-0.215893	1.7479	6.52421	0.498506	1.5	0.103364	0.883968	0.775045	0.409171	1.5	3	-0.943661
O=C1c2ccccc2C(=O)c2c(O)cc(-c3ccc(-c4ccc(C(F)(F)F)cc4)cc3)cc21	2.219	-8.71992	4.09986	97.8118	1.05005	0.939973	5.198	0.75709	1.5	0.64982	0.991594	0.759538	0.0791226	1.5	3	2.25803
CCN(CC)c1ccc(-c2oc3cc(-c4ccccc4)ccc3c(=O)c2O)cc1	2.219	-4.92428	4.06419	98.2812	-0.0525049	0.9042	5.38638	0.473809	1.5	0.196253	0.918041	0.777027	0.304134	1.5	3	-0.271087
O=C(Nc1cccc2ccc3cccnc3c12)C(F)(F)F	2.22	-3.99035	3.15628	97.1109	0.116706	2.61642	4.33873	0.840155	2	0.146716	0.910301	0.833047	0.816944	1	3	-9.92887
COc1ccc(-c2ccc3c(c2)C(=O)c2cccc(O)c2C3=O)cc1[N+](=O)[O-]	2.229	-7.01733	3.67157	97.562	0.0765945	1.88513	3.19597	0.977329	2	0.153686	0.999045	0.986396	0.852858	1	3	8.6714
COc1ccc(-c2ccc3c(c2)C(=O)c2cc(-c4ccc(-c5ccccc5)cc4)cc(O)c2C3=O)cc1	2.23	-10.0599	4.85535	98.276	0.74348	0.687892	4.14138	0.640755	2	0.855784	0.999552	0.977946	0.0194915	1	3	4.78497
Oc1cc(-c2ccccc2)ccc1-c1nc2ccc(-c3ccc(C(F)(F)F)cc3)cc2s1	2.235	-7.92283	4.14495	98.4616	0.799192	0.453341	5.7797	0.587874	1.5	0.777803	0.965551	0.423181	0.020887	1.5	3	-0.885125
CN(c1ccccc1)c1ccc(-c2cc(O)c3c(c2)C(=O)c2ccccc2C3=O)cc1	2.235	-7.68384	4.26477	98.3753	0.710562	0.804873	4.5603	0.615671	2	0.230235	0.986409	0.890748	0.772806	1	3	3.42684
O=CNc1ccccc1C(=O)c1nc2ccccc2s1	2.236	-4.3536	2.85957	97.7252	0.0212312	1.6993	3.92343	0.591069	2	0.0955985	0.992585	0.843921	0.728931	1	3	-11.7756
O=CNc1cccc2ccc3cccnc3c12	2.238	-3.06712	2.36483	98.9414	-0.222308	2.5176	5.84752	0.89535	1.5	0.126843	0.984781	0.910321	0.597394	1.5	3	-10.0888
O=c1c(O)c(-c2ccc(-c3ccc(N(c4ccccc4)c4ccccc4)cc3)cc2)oc2ccccc12	2.248	-6.33793	4.18293	98.4573	0.265458	0.381282	2.50648	0.696923	2	0.358244	0.973105	0.425155	0.7568	1	3	1.65861
CC(C)(C)c1ccc(Nc2ccc(-c3ccc4c(c3)C(=O)c3cccc(O)c3C4=O)cc2)cc1	2.251	-9.15784	3.36035	99.0613	0.763717	0.637227	3.60004	0.656328	2	0.721446	0.997462	0.89965	0.156315	1	3	0.30746
Oc1ccc(-c2ccc(N(c3ccccc3)c3ccccc3)cc2)cc1-c1nc2ccccc2s1	2.252	-8.80616	5.09732	99.1853	0.70587	0.312753	3.46752	0.546759	2	0.403189	0.949299	0.411591	0.867135	1	3	5.23575
CCN(CC)c1ccc(-c2oc3cc(Oc4ccccc4)ccc3c(=O)c2O)cc1	2.253	-4.96752	3.88679	98.638	-0.0956426	0.686078	5.04201	0.453344	1.5	0.261318	0.951176	0.855131	0.430264	1.5	3	1.40833
CNc1ccc(-c2ccc3nc(-c4ccc(-c5ccc(OC)cc5)cc4O)oc3c2)cc1	2.259	-6.2515	4.00127	97.391	-0.0164643	1.49255	5.44166	0.497197	1.5	0.658032	0.991792	0.79361	0.0701124	1.5	3	4.97367
Oc1cc(-c2ccc(N(c3ccccc3)c3ccccc3)cc2)ccc1-c1nc2ccccc2s1	2.26	-8.74294	5.1165	99.0635	0.650818	0.330871	3.21336	0.531781	2	0.385771	0.965981	0.458026	0.861588	1	3	6.63633
Oc1ccccc1-c1nc2ccc(-c3ccc(N(c4ccccc4)c4ccccc4)cc3)cc2s1	2.264	-8.78126	5.06758	99.1913	0.6428	0.282375	2.85211	0.556961	2	0.31884	0.959973	0.472491	0.857083	1	3	8.2345
N#Cc1cc(Cl)ccc1-c1ccc(O)c(-c2nc3ccccc3o2)c1	2.265	-5.83785	3.45294	98.76	-0.082381	0.859204	4.83038	0.815895	2	0.582066	0.928743	0.399549	0.797047	1	3	-1.4201
O=C1c2cc(-c3ccccc3)ccc2C(=O)c2c(O)cc(-c3ccc(C(F)(F)F)cc3)cc21	2.266	-8.46927	3.98292	98.353	1.14776	0.580181	5.55365	0.748153	1.5	0.675828	0.994982	0.836617	0.0542778	1.5	3	1.07057
O=C1c2ccccc2C(=O)c2c(O)cc(-c3ccc(N(c4ccccc4)c4ccccc4)cc3)cc21	2.267	-9.72541	5.24869	98.3136	0.993609	0.900827	2.52819	0.646352	2	0.250729	0.990027	0.760565	0.975896	1	3	3.03724
CC(C)(C)c1ccc(-c2ccc(-c3ccc(-c4ccc5c(c4)C(=O)c4cccc(O)c4C5=O)cc3)cc2)cc1	2.276	-9.87053	4.73553	98.8873	0.915003	0.315787	3.62057	0.666068	2	0.892395	0.998799	0.929321	0.00561518	1	3	0.820887
Oc1ccccc1-c1nc2ccc(-c3ccc(N(c4ccccc4)c4ccccc4)cc3)cc2[nH]1	2.278	-6.59439	4.31118	98.8743	0.752158	0.349931	3.34287	0.541642	2	0.450111	0.951615	0.599175	0.832765	1	3	8.76487
O=C1c2cc(-c3ccc(N(c4ccccc4)c4ccccc4)cc3)ccc2C(=O)c2c(O)cccc21	2.279	-9.84771	5.27436	98.6791	1.04663	0.575243	1.89371	0.682673	2	0.286235	0.991115	0.851553	0.908931	1	3	5.66237
Oc1cc(-c2ccc(N(c3ccccc3)c3ccccc3)cc2)ccc1-c1nc2ccccc2[nH]1	2.279	-6.4675	4.27938	98.8273	0.759956	0.430636	2.94991	0.595824	2	0.522161	0.957339	0.60781	0.902986	1	3	8.32869
Oc1ccc(-c2n[nH]c3c2ccc2cccnc23)cc1	2.28	-3.6909	3.46936	96.9934	0.256069	2.97403	9.59236	0.798571	1.5	0.269989	0.862991	0.786958	0.472227	1.5	3	-9.35089
Oc1ccc(-c2ccc(Cl)cc2C(F)(F)F)cc1-c1nc2ccccc2[nH]1	2.292	-5.87427	4.28843	98.9978	0.372968	0.320111	7.25595	0.667374	1.5	0.570264	0.862112	0.417727	0.379312	1.5	3	-3.42986
CN(C)c1ccc(-c2ccc3oc(-c4ccc([N+](=O)[O-])cc4)c(O)c(=O)c3c2)cc1	2.295	-5.22776	2.7758	98.6396	-0.27752	0.730507	5.06091	0.708893	1.5	0.276548	0.998212	0.961287	0.688216	1.5	3	6.79868
CNNC(=O)c1nc2ccccc2s1	2.296	-1.99415	1.22668	94.7925	0.280947	4.76911	4.15942	0.753753	2	0.0376577	0.999203	0.991514	0.788909	1	3	-7.10755
CNc1ccc(-c2ccc(-c3nc4ccc(-c5ccc(-c6ccccc6)cc5)cc4o3)c(O)c2)cc1	2.298	-7.76795	4.87009	98.3561	0.372667	0.72622	4.32334	0.550435	2	0.827845	0.996075	0.818597	0.0213597	1	3	4.32217
Oc1cc(-c2ccc(N(c3ccccc3)c3ccccc3)cc2)cc2ccc3cccnc3c12	2.3	-7.03582	4.68808	98.3944	0.529063	0.619346	3.30478	0.590711	2	0.433814	0.984635	0.690423	0.951696	1	3	-0.676847
CN(C)c1ccc(-c2ccc3nc(-c4nc5ccccc5o4)[nH]c3c2)cc1	2.304	-5.07594	3.63105	98.5737	0.0892305	0.833765	5.4468	0.544777	1.5	0.429668	0.927934	0.838838	0.0675456	1.5	3	-7.50739
Oc1cccc2ccc3cc(-c4ccc(N(c5ccccc5)c5ccccc5)cc4)cnc3c12	2.304	-7.2352	4.90462	98.4058	0.629696	0.605935	4.14143	0.502511	2	0.370411	0.959244	0.63389	0.828274	1	3	-2.94542
CCN(CC)c1ccc(-c2ccc(-c3nc4ccc(OC)cc4[nH]3)c(O)c2)cc1	2.309	-4.92282	3.33029	97.8934	0.272517	1.24292	6.41357	0.356964	1.5	0.497166	0.957873	0.916811	0.121441	1.5	3	4.1927
COc1ccc(-c2ccc3c(c2)C(=O)c2cccc(O)c2C3=O)cc1-c1ccc([N+](=O)[O-])cc1	2.31	-8.24737	4.01445	98.2794	0.50597	1.17882	2.81595	0.82597	2	0.605227	0.999755	0.992993	0.567217	1	3	6.83535
N#Cc1ccc(-c2ccc(-c3nc4ccc(-c5ccc(-c6ccccc6)cc5)cc4o3)c(O)c2)cc1	2.313	-8.65245	4.80557	98.0386	0.594577	0.834561	3.35705	0.790364	2	0.951527	0.994338	0.720928	0.0305265	1	3	-1.9885
CN(C)c1ccc(-c2ccc(-c3ccc4oc(-c5ccc(-c6ccccc6)cc5)c(O)c(=O)c4c3)cc2)cc1	2.315	-6.62465	3.39447	98.2809	0.167284	0.397882	4.63354	0.665025	2	0.774585	0.996223	0.878628	0.00540605	1	3	0.443386
CCN(CC)c1ccc(-c2cc(O)c3c(c2)C(=O)c2cc(OC)ccc2C3=O)cc1	2.32	-7.69549	4.15486	97.7734	0.612101	1.96679	5.62176	0.423514	1.5	0.305083	0.994829	0.97422	0.225554	1.5	3	4.16356
CN(C)c1ccc(-c2ccc(-c3ccc(-c4nc5ccc(-c6ccccc6)cc5o4)c(O)c3)cc2)cc1	2.321	-7.57834	4.8497	98.2673	0.403701	0.620715	4.65664	0.517908	2	0.765256	0.992052	0.813387	0.0199626	1	3	3.81937
CCN(CC)c1ccc(-c2ccc3c(c2)C(=O)c2cc(OC)cc(O)c2C3=O)cc1	2.322	-7.78151	4.13855	98.3458	0.703654	1.20032	5.78209	0.453124	1.5	0.337644	0.995009	0.97789	0.169668	1.5	3	4.72786
CC(C)(C)Nc1ccc(-c2ccc(-c3ccc4c(c3)C(=O)c3cccc(O)c3C4=O)cc2)cc1	2.323	-8.41525	3.90784	98.7726	0.73711	0.662396	3.81974	0.686867	2	0.752105	0.996819	0.938277	0.0244902	1	3	0.948658
Cc1cc(-c2ccc(-c3ccc4occ(O)c(=O)c4c3)cc2)cc(C)c1C	2.328	-5.91855	3.31655	97.91	0.413919	1.56244	9.60578	0.793901	1.5	0.580637	0.980738	0.726694	0.0207209	1.5	3	-2.95155
CCCCN(CCCC)c1ccc(-c2ccc(-c3nc4ccccc4o3)c(O)c2)cc1	2.331	-6.55001	4.7142	98.7179	0.2316	0.628017	4.70568	0.298588	2	0.807145	0.749641	0.466904	0.4871	1	3	8.94383
CCN(CC)c1ccc(-c2ccc3nc(-c4nc5ccccc5s4)[nH]c3c2)cc1	2.335	-5.83198	3.46793	98.8534	0.244309	0.643879	5.86855	0.271794	1.5	0.451974	0.977556	0.896275	0.250764	1.5	3	-3.73729
N#Cc1ccc(NCc2oc3ccccc3c(=O)c2O)cc1	2.337	-3.76837	2.18986	97.3563	-0.0164966	2.35644	6.6257	0.872113	1.5	0.554308	0.921352	0.599565	0.56039	1.5	3	-9.0912
CN(C)c1ccc(-c2ccc(-c3nc4cc(N(C)C)ccc4o3)c(O)c2)cc1	2.338	-4.1201	3.81277	96.8004	0.042744	2.36012	6.26208	0.536703	1.5	0.194167	0.926862	0.774249	0.321305	1.5	3	10.5307
COc1ccc(C#N)cc1-c1ccc(-c2nc3ccc(-c4ccccc4)cc3o2)c(O)c1	2.341	-6.41908	4.12097	98.2176	0.439927	1.13571	5.03843	0.840663	1.5	0.815996	0.96503	0.578872	0.157977	1.5	3	3.80066
CCCCN(CCCC)c1ccc(-c2oc3cc(OC)ccc3c(=O)c2O)cc1	2.343	-5.07741	4.42747	98.2342	-0.0187589	1.076	5.16705	0.40749	1.5	0.619808	0.718092	0.55673	0.567307	1.5	3	-0.331252
O=C1c2cc(-c3ccc(-c4ccc(N(c5ccccc5)c5ccccc5)cc4)cc3)ccc2C(=O)c2c(O)cccc21	2.345	-11.3886	5.82176	98.9033	1.16631	0.369457	1.53704	0.715223	2	0.598261	0.998061	0.900906	0.547663	1	3	1.46622
Oc1cccc(-c2n[nH]c3c2ccc2cccnc23)c1	2.347	-3.61526	3.40011	96.6781	0.17014	3.55649	8.31548	0.644358	1.5	0.255344	0.838888	0.796439	0.486333	1.5	3	-9.46379
CCN(CC)c1ccc(-c2ccc3nc(-c4nc5ccccc5[nH]4)[nH]c3c2)cc1	2.347	-5.09434	3.64494	97.8457	0.216258	1.82281	5.66839	0.328229	1.5	0.616431	0.96934	0.92136	0.151755	1.5	3	-6.04694
CCCCN(CCCC)c1ccc(-c2ccc3oc(-c4ccccc4)c(O)c(=O)c3c2)cc1	2.349	-5.36576	4.53261	98.8407	0.111924	0.419084	4.63202	0.437726	2	0.787645	0.906557	0.502494	0.334895	1	3	4.22603
N#Cc1cc(Cl)ccc1-c1ccc(O)c(-c2nc3ccc(-c4ccccc4)cc3o2)c1	2.351	-7.16035	3.89523	98.7575	0.162698	0.685905	4.57406	0.793284	2	0.790911	0.970096	0.435951	0.614439	1	3	1.14922
CCCCN(CCCC)c1ccc2oc(-c3ccc(-c4ccccc4)cc3)c(O)c(=O)c2c1	2.353	-5.32053	4.59397	98.9182	0.0966929	0.385196	4.55625	0.487126	2	0.79583	0.824103	0.532214	0.423673	1	3	-0.699736
Cc1cc(-c2ccc3oc(-c4ccc(-c5ccc(-c6ccccc6)cc5)cc4)c(O)c(=O)c3c2)cc(C)c1C	2.382	-7.16387	3.7356	98.5135	0.390689	0.511317	4.54734	0.740088	2	0.828099	0.996107	0.772789	0.0116732	1	3	-1.96495
O=c1c(O)c(-c2ccc(-c3ccc(-c4ccccc4)cc3)cc2)oc2ccc(-c3nc4ccccc4[nH]3)cc12	2.384	-6.90608	3.50065	97.9415	0.109161	0.562799	2.80879	0.898285	2	0.79052	0.99727	0.894139	0.0232237	1	3	-4.04196
CCN(CC)c1ccc(-c2ccc3c(c2)C(=O)c2cc(Oc4ccccc4)cc(O)c2C3=O)cc1	2.385	-8.48971	4.50786	98.7945	0.927278	0.668843	3.62005	0.556752	2	0.534842	0.997287	0.982124	0.312174	1	3	3.942
CCN(CC)c1ccc(-c2ccc3oc(-c4ccc([N+](=O)[O-])cc4)c(O)c(=O)c3c2)cc1	2.387	-5.56217	3.75222	98.4201	-0.301112	0.897142	4.93195	0.569432	2	0.259597	0.99815	0.963742	0.71775	1	3	7.92211
O=CNc1ccccc1-c1cnc2c(ccc3cccc(O)c32)c1	2.388	-3.84454	2.97478	98.5982	-0.238643	1.02102	6.42275	0.470844	1.5	0.188758	0.98575	0.915165	0.338032	1.5	3	-10.1779
CCN(CC)c1ccc(-c2ccc3c(c2)C(=O)c2cccc(O)c2C3=O)cc1-c1ccccc1	2.388	-8.47237	4.51341	98.5014	0.881318	1.00314	3.70861	0.493856	2	0.53197	0.991637	0.954848	0.311021	1	3	5.27315
CCN(CC)c1ccc(-c2ccc3nc(-c4nc5ccccc5o4)[nH]c3c2)cc1	2.389	-5.11152	3.67225	98.2435	0.129753	1.18872	5.30825	0.387759	1.5	0.408044	0.925902	0.847818	0.0773469	1.5	3	-7.07777
Nc1ccc(-c2ccc3c(c2)C(=O)c2cc(-c4ccc(C(F)(F)F)cc4)cc(O)c2C3=O)cc1	2.395	-7.91541	3.29168	97.93	1.10687	1.02552	5.34213	0.829533	1.5	0.607525	0.997183	0.967448	0.0392524	1.5	3	1.47464
CNc1ccccc1-c1ccc(-c2nc3ccc(C(C)(C)C)cc3o2)c(O)c1	2.398	-6.28323	3.87264	98.5283	0.140772	1.02901	6.48115	0.398951	1.5	0.341662	0.944057	0.367966	0.655233	1.5	3	0.590369
CN(C)c1ccc2c(c1)C(=O)c1cc(-c3ccc(C(F)(F)F)cc3)cc(O)c1C2=O	2.399	-7.29542	3.77986	98.5322	0.928179	0.795267	6.47636	0.758611	1.5	0.360046	0.988291	0.864669	0.154532	1.5	3	3.5429
CNc1ccc(-c2cc(O)c3c(c2)C(=O)c2cc(-c4ccc([N+](=O)[O-])cc4)ccc2C3=O)cc1	2.4	-8.99455	3.8093	98.1065	0.328486	1.44807	4.38639	0.664535	2	0.65235	0.999964	0.997278	0.548264	1	3	2.91337
CN(C)c1ccc(-c2ccc3c(c2)C(=O)c2cc(-c4ccc(-c5ccc(-c6ccccc6)cc5)cc4)cc(O)c2C3=O)cc1	2.4	-11.6174	5.2214	98.2839	0.820861	0.46857	3.95642	0.622767	2	0.92672	0.999879	0.990847	0.00296995	1	3	2.73611
CCCCN(CCCC)c1ccc2oc(-c3ccc(Oc4ccccc4)cc3)c(O)c(=O)c2c1	2.401	-5.47297	4.52759	99.1019	0.0611079	0.32293	4.18546	0.49148	2	0.81967	0.838695	0.618489	0.62346	1	3	-7.89404
O=C1c2ccccc2C(=O)c2c(O)cc(-c3oc4ccccc4c(=O)c3O)cc21	2.405	-5.01838	3.06953	97.3448	-0.266938	1.60211	3.75861	0.891364	2	0.0947947	0.983749	0.888222	0.785404	1	3	-0.245997
CCN(CC)c1ccc(-c2ccc3nc(-c4nc5ccccc5[nH]4)oc3c2)cc1	2.407	-5.07861	3.64632	98.1113	0.137097	1.3969	5.1582	0.458921	1.5	0.3556	0.883109	0.834385	0.21672	1.5	3	-7.18434
CNc1ccc(C(C)(C)C)cc1-c1cc(O)c2c(c1)C(=O)c1ccccc1C2=O	2.408	-7.02467	4.2211	98.1935	0.575106	1.58269	5.8025	0.56572	1.5	0.290039	0.984499	0.789197	0.5984	1.5	3	1.26272
O=C1c2cc(-c3ccc(-c4ccc(-c5ccc(N(c6ccccc6)c6ccccc6)cc5)cc4)cc3)ccc2C(=O)c2c(O)cccc21	2.409	-12.7204	6.36732	98.9089	1.25384	0.302606	1.24724	0.755987	2	0.849208	0.999587	0.934274	0.126967	1	3	2.49561
N#Cc1cc(Cl)ccc1NC(=O)c1nc2ccc(-c3ccccc3O)cc2o1	2.411	-6.25481	3.27434	98.1467	-0.117098	1.46903	2.94588	0.805794	2	0.551336	0.947144	0.536776	0.711058	1	3	-4.96157
CCN(CC)c1ccc(-c2ccc(-c3nc4ccc(-c5ccc(-c6ccccc6)cc5)cc4s3)c(O)c2)cc1	2.411	-7.82881	4.51386	98.9282	0.732336	0.447019	4.69142	0.39159	2	0.848785	0.996133	0.918595	0.008891	1	3	5.4724
CCN(CC)c1ccc(-c2oc3cc(C#N)ccc3c(=O)c2O)cc1	2.413	-4.63189	3.01113	98.0235	-0.163974	1.46673	7.36709	0.875869	1.5	0.262689	0.887439	0.73824	0.620724	1.5	3	-0.923984
CCN(CC)c1ccc(-c2ccc(-c3nc4ccc(-c5ccc(-c6ccccc6)cc5)cc4o3)c(O)c2)cc1	2.419	-7.18181	4.47354	98.1555	0.547969	0.742311	4.47297	0.427746	2	0.766098	0.992224	0.832583	0.0227372	1	3	10.0061
CCN(CC)c1ccc(-c2ccc(-c3nc4ccc(-c5ccc(O)cc5)cc4o3)c(O)c2)cc1	2.422	-5.61616	3.64139	97.9887	0.146758	1.30126	5.69622	0.572242	1.5	0.437862	0.934187	0.730615	0.205971	1.5	3	8.50615
CCN(CC)c1ccc(-c2ccc(-c3nc4cc(N(C)C)ccc4o3)c(O)c2)cc1	2.423	-5.44984	3.6726	98.0633	0.0826572	1.31134	5.99024	0.407172	1.5	0.180579	0.925079	0.786265	0.35288	1.5	3	9.85511
CCN(CC)c1ccc(-c2ccc(-c3nc4ccc(-c5ccc(-c6ccccc6)cc5)cc4[nH]3)c(O)c2)cc1	2.424	-6.10839	3.85199	98.076	0.620613	0.699949	4.51769	0.45475	2	0.903632	0.995728	0.94649	0.00869234	1	3	3.99774
CCN(CC)c1ccc(-c2ccc(-c3nc4ccc(N(C)C)cc4o3)c(O)c2)cc1	2.426	-5.43508	3.64518	97.9553	0.0905655	1.48679	6.15464	0.374621	1.5	0.175739	0.91974	0.804246	0.412429	1.5	3	10.8334
CN(C)c1ccc(-c2ccc3c(c2)C(=O)c2cc(-c4ccc(C(C)(C)C)cc4)cc(O)c2C3=O)cc1	2.428	-8.64495	3.58773	98.8705	0.751708	0.542141	5.9928	0.527369	1.5	0.618585	0.997755	0.939203	0.0795066	1.5	3	1.69821
CCN(CC)c1ccc(-c2ccc(-c3nc4ccc(-c5ccc(N)cc5)cc4s3)c(O)c2)cc1	2.429	-6.4202	3.25486	98.2758	0.470897	1.30287	5.10719	0.384504	1.5	0.517702	0.98911	0.976442	0.0485738	1.5	3	6.23437
O=C1c2cc(-c3ccc(Oc4ccccc4)cc3)ccc2C(=O)c2c(O)cc(-c3ccc(C(F)(F)F)cc3)cc21	2.429	-9.22219	4.19067	98.4498	1.2212	0.40302	4.19004	0.704881	2	0.897106	0.999041	0.92347	0.0194565	1	3	2.73525
O=c1c(O)c(-c2nc3ccccc3[nH]2)oc2ccc(-c3ccc(-c4ccc(-c5ccccc5)cc4)cc3)cc12	2.438	-7.09273	3.6152	97.7649	0.233335	0.670508	3.70038	0.749949	2	0.870307	0.995146	0.857764	0.00392777	1	3	-3.3926
COc1ccc(-c2ccc3c(c2)C(=O)c2cccc(O)c2C3=O)cc1-c1ccc(-c2ccc(C(C)(C)C)cc2)cc1	2.439	-9.14482	4.246	99.4749	0.994091	0.245545	3.46985	0.675314	2	0.884425	0.998298	0.900449	0.0131008	1	3	-1.02708
CCN(CC)c1ccc(-c2ccc3c(c2)C(=O)c2cc(-c4ccc(O)cc4)cc(O)c2C3=O)cc1	2.443	-8.15328	4.19945	97.6712	0.688468	2.10679	5.38885	0.705818	1.5	0.460718	0.995624	0.97746	0.205493	1.5	3	3.54119
O=c1c(O)c(-c2cc3c4c(c2)CCCN4CCC3)oc2ccccc12	2.443	-4.50548	3.0923	98.2307	-0.189226	1.68522	5.12703	0.336685	1.5	0.271246	0.837649	0.73505	0.575138	1.5	3	-0.0106881
CCN(CC)c1ccc(-c2ccc3c(c2)C(=O)c2cc(-c4ccc(-c5ccccc5)cc4)cc(O)c2C3=O)cc1	2.444	-9.75458	4.78628	98.4982	0.89752	0.676319	4.17982	0.499026	2	0.747068	0.999395	0.986332	0.0282646	1	3	2.34808
CCN(CC)c1ccc(-c2cc(O)c3c(c2)C(=O)c2cc(-c4ccc(-c5ccccc5)cc4)ccc2C3=O)cc1	2.444	-9.75458	4.78628	98.5217	0.893111	0.675874	4.09416	0.507432	2	0.7523	0.999419	0.986623	0.0283188	1	3	3.08463
O=CNc1cc(O)c2c(ccc3cccnc32)c1	2.446	-3.41019	2.32439	97.6092	-0.215966	2.71125	5.42121	0.700549	1.5	0.104327	0.980994	0.937166	0.6494	1.5	3	-7.02079
COc1cccc(-c2ccc(-c3nc4ccc(-c5ccc(NC(C)(C)C)cc5)cc4o3)c(O)c2)c1	2.45	-6.75462	3.88719	98.7986	0.239954	0.70893	5.41214	0.484574	1.5	0.807131	0.986705	0.546934	0.0329063	1.5	3	-0.00126163
Cc1cc(-c2ccc3c(c2)C(=O)c2cc(-c4ccc(N)cc4)cc(O)c2C3=O)cc(C)c1C	2.451	-8.9679	3.45393	98.2412	0.855842	1.5861	5.03667	0.687159	1.5	0.486911	0.998423	0.991733	0.206555	1.5	3	3.93676
CN(C)c1ccc2nc(-c3cc(O)c4c(c3)C(=O)c3ccccc3C4=O)[nH]c2c1	2.458	-6.85195	3.5565	98.2034	0.570837	1.41404	4.43778	0.658552	2	0.180137	0.992649	0.964265	0.800835	1	3	6.50298
N#CC(C#N)=Cc1ccc(-c2ccc(-c3oc4ccccc4c(=O)c3O)cc2)cc1	2.462	-5.80342	3.30926	98.7039	-0.481083	0.563234	3.19055	0.970128	2	0.192684	0.988677	0.869367	0.759792	1	3	-1.78967
CCN(CC)c1ccc(-c2ccc3c(c2)C(=O)c2cc(C(F)(F)F)cc(O)c2C3=O)cc1	2.467	-7.94772	4.16921	98.4418	0.862559	0.83465	5.31742	0.536819	1.5	0.351238	0.990556	0.901171	0.113141	1.5	3	3.96462
COc1ccc(-c2cc3cc(-c4nc5cc([N+](=O)[O-])ccc5o4)c(O)cc3o2)cc1	2.473	-6.29421	3.96477	98.207	0.00746604	1.35487	4.24446	0.859267	2	0.20092	0.999166	0.883469	0.866842	1	3	-0.469556
Cc1cc(-c2cc(O)c3c(c2)C(=O)c2cc(N(C)C)ccc2C3=O)cc(C)c1C	2.474	-7.97491	3.84053	97.8927	0.684174	1.86443	6.02597	0.665794	1.5	0.271104	0.993949	0.966677	0.472743	1.5	3	5.56739
CCN(CC)c1ccc(-c2oc3ccc(-c4cc(C)c(C)c(C)c4)cc3c(=O)c2O)cc1	2.475	-5.90902	4.5474	98.1263	0.0353683	1.26188	6.46111	0.49294	1.5	0.216405	0.955205	0.755388	0.331987	1.5	3	3.13176
CCN(CC)c1ccc(-c2ccc(-c3nc4cc(-c5ccc([N+](=O)[O-])cc5)ccc4o3)c(O)c2)cc1	2.475	-6.89858	3.86125	98.2724	0.123567	0.944919	4.52183	0.488439	2	0.54498	0.998893	0.960076	0.488497	1	3	10.2576
CCN(CC)c1ccc(-c2ccc(Nc3ccc(-c4nc5ccc(-c6ccccc6)cc5o4)c(O)c3)cc2)cc1	2.479	-7.02211	3.35281	98.4211	0.592274	0.877823	4.10408	0.432832	2	0.771206	0.998092	0.847456	0.0634321	1	3	2.77349
Cc1cc(-c2oc3ccc(-c4ccc(-c5ccc(C(F)(F)F)cc5)cc4)cc3c(=O)c2O)cc(C)c1C	2.488	-6.5908	3.41121	99.0314	0.568833	0.334749	7.24451	0.734291	1.5	0.716725	0.975013	0.335041	0.0159105	1.5	3	-2.15412
CCN(CC)c1ccc(-c2oc3cc(-c4cc(C)c(C)c(C)c4)ccc3c(=O)c2O)cc1	2.489	-5.83962	4.5427	98.0506	0.0319713	1.36011	6.4186	0.453107	1.5	0.244658	0.957646	0.793065	0.313618	1.5	3	-2.26806
N#CC(C#N)=Cc1ccc(-c2oc3ccccc3c(=O)c2O)cc1	2.49	-3.98256	2.63863	98.3683	-0.565133	0.931771	3.34888	0.960189	2	0.0631883	0.958498	0.802129	0.944728	1	3	-4.54494
CC(C)(C)c1ccc(-c2ccc3nc(-c4cc(O)c5c(c4)C(=O)c4ccccc4C5=O)[nH]c3c2)cc1	2.492	-8.37217	3.80362	99.2771	0.823907	0.361946	4.37682	0.582715	2	0.614736	0.997368	0.882444	0.333404	1	3	-1.89504
CCN(CC)c1ccc(-c2cc(O)c3c(c2)C(=O)c2cc(-c4ccc(Oc5ccccc5)cc4)ccc2C3=O)cc1	2.494	-9.23111	4.57932	98.6135	0.87277	0.612333	3.60013	0.507413	2	0.771886	0.999448	0.991015	0.0744208	1	3	2.39524
CCN(CC)c1ccc(-c2ccc3c(c2)C(=O)c2cc(-c4ccc(Oc5ccccc5)cc4)cc(O)c2C3=O)cc1	2.494	-9.23111	4.57932	98.6473	0.880986	0.605762	3.71198	0.510547	2	0.776428	0.99946	0.991434	0.0629947	1	3	1.98945
O=CNc1ccc(Cl)cc1-c1cnc2c(ccc3cccc(O)c32)c1	2.498	-5.47234	3.18445	98.9481	-0.465015	0.462637	5.96053	0.451814	1.5	0.314205	0.99372	0.867951	0.293084	1.5	3	-10.2465
Oc1ccc(-c2ccc(-c3cc4c5c(c3)CCCN5CCC4)cc2)cc1-c1nc2ccccc2o1	2.498	-7.62498	4.27201	98.1645	0.519249	1.54961	4.33134	0.408741	2	0.801313	0.984522	0.770032	0.138018	1	3	5.06322
N#CC(C#N)=Cc1ccc(-c2ccc(-c3nc4ccccc4o3)c(O)c2)cc1	2.499	-6.58071	3.98353	98.8231	-0.404026	0.644914	3.47722	0.772522	2	0.167638	0.977389	0.785581	0.905571	1	3	-5.18842
N#CC(C#N)=Cc1ccc(-c2ccc(-c3nc4ccccc4s3)c(O)c2)cc1	2.5	-6.99207	4.13522	99.2813	-0.309173	0.439756	3.77972	0.696767	2	0.208577	0.985249	0.882316	0.865247	1	3	-3.50972
CCN(CC)c1ccc(-c2ccc(-c3nc4cc(N(CC)CC)ccc4o3)c(O)c2)cc1	2.501	-6.65641	3.72151	97.9598	0.132111	1.32853	5.26945	0.324806	1.5	0.172298	0.906367	0.808299	0.406561	1.5	3	10.1739
COc1ccc(OC)c(-c2ccc3c(c2)C(=O)c2cc(C(=O)c4ccc([N+](=O)[O-])cc4)cc(O)c2C3=O)c1	2.502	-8.90216	4.15119	98.102	0.665457	1.05169	4.75267	0.718622	2	0.773289	0.999987	0.996661	0.238637	1	3	1.51831
CCN(CC)c1ccc2cc(-c3ccc4c(c3)C(=O)c3cccc(O)c3C4=O)oc2c1	2.503	-7.25834	4.04107	97.9633	0.80656	1.67165	3.24823	0.772545	2	0.0722374	0.983014	0.948595	0.848537	1	3	3.81292
CCN(CC)c1ccc(-c2ccc(-c3nc4ccc(N(CC)CC)cc4o3)c(O)c2)cc1	2.504	-6.67514	3.68998	97.9364	0.128562	1.38649	5.42214	0.302363	1.5	0.168233	0.913244	0.821403	0.451346	1.5	3	12.1033
O=C1c2cc(-c3ccc(-c4ccccc4)cc3-c3ccc(-c4ccc([N+](=O)[O-])cc4)cc3)ccc2C(=O)c2c(O)cccc21	2.504	-11.1225	5.14951	98.0458	0.87302	0.532508	2.00746	0.804853	2	0.936939	0.999973	0.996873	0.049067	1	3	-2.32399
COS(=O)(=O)Nc1ccc2c(c1)C(=O)c1cccc(O)c1C2=O	2.505	-5.5255	2.80257	97.0947	0.0149851	2.9623	3.52085	0.798349	2	0.116603	0.990522	0.953436	0.933617	1	3	1.10203
CN(C)c1ccc(-c2ccc(-c3ccc4oc(-c5nc6ccccc6[nH]5)c(O)c(=O)c4c3)cc2)cc1	2.508	-6.17583	3.00428	98.7378	0.0904854	0.43345	5.04567	0.625953	1.5	0.606301	0.987223	0.891442	0.0166053	1.5	3	1.4289
CCN(CC)c1ccc2cc(-c3oc4ccccc4c(=O)c3O)oc2c1	2.513	-5.06152	3.56161	98.3885	-0.16435	1.05662	5.32103	0.496225	1.5	0.0918549	0.73911	0.745979	0.682893	1.5	3	1.4249
CN(C)c1ccc(-c2ccc3c(c2)C(=O)c2cc(NC(C)(C)C)cc(O)c2C3=O)cc1	2.517	-7.70303	3.70627	98.8199	0.803579	0.75814	6.65636	0.533544	1.5	0.472741	0.995445	0.943062	0.135917	1.5	3	3.64372
N#CC(C#N)=Cc1ccc(-c2cc(O)c3c(c2)C(=O)c2ccccc2C3=O)cc1	2.518	-7.69972	3.90912	98.2945	-0.276981	1.09058	3.13355	0.961117	2	0.126087	0.995778	0.967297	0.974168	1	3	1.85688
Cc1cc(-c2ccc3nc(-c4oc5ccccc5c(=O)c4O)sc3c2)cc(C)c1C	2.518	-5.8065	3.63794	98.8192	0.0641319	0.784007	4.10059	0.7854	2	0.342053	0.978079	0.769714	0.340812	1	3	-2.84221
CCN(CC)c1ccc2cc(-c3cc(O)c4c(c3)C(=O)c3ccccc3C4=O)oc2c1	2.519	-7.30423	4.28139	97.6415	0.786726	2.20695	3.81855	0.59114	2	0.0832811	0.983285	0.924624	0.907856	1	3	2.61498
CCN(CC)c1ccc(-c2ccc3c(c2)C(=O)c2cc(-c4ccc(-c5ccc(-c6ccccc6)cc5)cc4)cc(O)c2C3=O)cc1	2.52	-10.9744	5.23181	98.2845	0.988493	0.578061	3.62866	0.546364	2	0.920328	0.999877	0.991492	0.00344274	1	3	3.44748
CCN(CC)c1ccc(-c2cc(O)c3c(c2)C(=O)c2cc(-c4ccc(C(C)(C)C)cc4)ccc2C3=O)cc1	2.521	-9.14423	4.22488	99.0602	0.781785	0.49967	5.5842	0.406524	1.5	0.608305	0.997753	0.943812	0.0918436	1.5	3	1.62629
CCN(CC)c1ccc(-c2ccc3c(c2)C(=O)c2cc(-c4ccc(C(C)(C)C)cc4)cc(O)c2C3=O)cc1	2.521	-9.14423	4.22488	99.0664	0.781441	0.497639	5.62039	0.402383	1.5	0.597002	0.997701	0.94328	0.0910507	1.5	3	2.24892
O=C(Nc1ccccc1)c1nc2scnc2s1	2.527	-3.809	2.54283	96.4526	-0.260112	3.07259	4.76186	0.565691	2	0.173656	0.997675	0.835237	0.96747	1	3	-5.71315
CN(C)N(c1ccccc1)c1ccc(-c2ccc3c(c2)C(=O)c2cccc(O)c2C3=O)cc1	2.534	-5.89916	3.55605	98.2017	0.600825	1.35386	3.74863	0.673551	2	0.430446	0.95458	0.963143	0.638741	1	3	5.37816
COc1ccc(C#N)cc1-c1ccc2c(c1)C(=O)c1cc(-c3ccc([N+](=O)[O-])cc3)cc(O)c1C2=O	2.534	-8.42876	3.68963	97.9687	0.451104	1.53787	3.83025	1.08672	2.5	0.87464	0.999926	0.99403	0.597459	0.5	3	4.55402
Cc1cc(-c2oc3ccc(-c4ccc(N(c5ccccc5)c5ccccc5)cc4)cc3c(=O)c2O)cc(C)c1C	2.546	-6.37115	3.7795	99.4233	0.524715	0.270443	4.21018	0.614874	2	0.306041	0.968465	0.332974	0.889502	1	3	7.85231
CCN(CC)c1ccc(-c2ccc(-c3nc4cc(-c5cc(C)c(C)c(C)c5)ccc4o3)c(O)c2)cc1	2.551	-7.39762	3.98017	98.4258	0.391882	0.901223	5.71696	0.372975	1.5	0.49678	0.978501	0.741644	0.139335	1.5	3	9.96634
O=c1c(O)c(-c2ccc3nc(-c4ccc(-c5ccccc5)cc4)[nH]c3c2)oc2ccc(-c3ccc(-c4ccccc4)cc3)cc12	2.553	-7.92513	3.83301	97.6655	0.323026	0.431559	2.74643	0.82911	2	0.930953	0.999077	0.889829	0.00281737	1	3	-3.77187
CCN(CC)c1ccc2cc(-c3oc4cc(-c5ccccc5)ccc4c(=O)c3O)oc2c1	2.554	-5.19435	4.10352	98.6316	0.0674059	0.62359	5.09474	0.520776	1.5	0.210688	0.87928	0.789509	0.425111	1.5	3	5.03358
CCN(CC)c1nc2ccc(-c3ccc(-c4nc5cc(-c6ccccc6)ccc5o4)c(O)c3)cc2s1	2.554	-7.62625	4.28653	99.8838	0.420754	0.103361	3.57434	0.600738	2	0.763311	0.996987	0.74001	0.114221	1	3	2.90672
N#CC(=Cc1ccc2c(c1)C(=O)c1cc(-c3ccccc3O)cc(O)c1C2=O)c1ccccc1	2.555	-7.6907	4.20058	98.4189	0.0098796	0.928775	3.32795	0.71157	2	0.109636	0.992908	0.954875	0.975165	1	3	2.47173
CCN(CC)c1ccc(-c2ccc(-c3nc4cc(-c5ccc(N(CC)CC)cc5)ccc4o3)c(O)c2)cc1	2.565	-6.99478	3.83561	98.2027	0.244156	0.872011	5.03569	0.330704	1.5	0.394666	0.977319	0.868124	0.0829067	1.5	3	16.1672
CCN(CC)c1ccc(-c2nc3sc(-c4cc(-c5ccccc5)ccc4O)nc3s2)cc1	2.569	-6.88134	3.31417	98.8743	0.431365	0.730333	5.0505	0.607258	1.5	0.223816	0.994462	0.80785	0.609082	1.5	3	5.04119
CCN(CC)c1ccc2cc(-c3oc4cc(OC)ccc4c(=O)c3O)oc2c1	2.576	-4.95839	3.45238	98.0278	-0.0696423	1.47808	5.90678	0.489895	1.5	0.110753	0.830572	0.787081	0.515937	1.5	3	1.34127
N#CC(C#N)=Cc1ccc2c(c1)C(=O)c1cc(-c3ccccc3)cc(O)c1C2=O	2.577	-7.71177	4.02091	98.6872	-0.21521	0.787938	3.47909	0.915793	2	0.13895	0.998282	0.978053	0.927398	1	3	2.09983
N#CC(C#N)=Cc1ccc(-c2cc(O)c3c(ccc4cccnc43)c2)cc1	2.58	-5.79013	3.3913	97.9319	-0.463428	1.37266	3.83687	0.805417	2	0.240232	0.993393	0.952675	0.950662	1	3	-7.20385
CCN(CC)c1ccc(-c2cc(O)c3c(c2)C(=O)c2cc(-c4nc5ccccc5[nH]4)ccc2C3=O)cc1	2.581	-7.81126	3.74546	98.3166	0.637483	1.20716	3.89897	0.533449	2	0.425144	0.99854	0.98961	0.357268	1	3	5.29578
O=C(Nc1cc(O)c2c(ccc3cc(C(F)(F)F)cnc32)c1)c1nc2ccccc2s1	2.582	-6.38642	3.7092	98.4191	0.396578	0.98535	3.45349	0.752003	2	0.540565	0.996738	0.784329	0.429155	1	3	-7.99202
CCN(CC)c1ccc(-c2ccc3c(c2)C(=O)c2cc(-c4nc5ccccc5[nH]4)cc(O)c2C3=O)cc1	2.582	-7.84168	3.76702	98.4689	0.743443	1.0235	3.91786	0.496216	2	0.449413	0.999027	0.989946	0.353096	1	3	6.08754
CCCCN(CCCC)c1ccc2oc(-c3cc(C)c(C)c(C)c3)c(O)c(=O)c2c1	2.586	-5.54775	4.97289	98.7596	0.190581	0.699132	6.46851	0.3284	1.5	0.560563	0.56155	0.406973	0.85529	1.5	3	-1.9444
CN(C)c1ccc(-c2ccc(-c3ccc4c(c3)C(=O)c3cc(-c5nc6ccccc6[nH]5)cc(O)c3C4=O)cc2)cc1	2.589	-10.0665	4.07997	98.7012	0.808647	0.56981	3.61625	0.599162	2	0.768838	0.999798	0.9931	0.0538579	1	3	2.45207
CCN(CC)c1ccc(-c2ccc3c(c2)C(=O)c2cc(-c4ccc(OC(C)(C)C)cc4)cc(O)c2C3=O)cc1	2.59	-8.65055	4.21256	99.1422	0.839197	0.493471	5.22708	0.475473	1.5	0.573789	0.997516	0.954506	0.0641144	1.5	3	1.55411
CCCCN(CCCC)c1ccc(-c2cc3cc(-c4nc5ccccc5o4)c(O)cc3o2)cc1	2.591	-7.28273	5.00749	98.8537	0.2973	0.575261	3.82608	0.483071	2	0.603743	0.854125	0.414931	0.753214	1	3	2.3781
CCCCN(CCCC)c1ccc(-c2cc3cc(-c4nc5ccccc5s4)c(O)cc3o2)cc1	2.591	-7.5029	4.65336	99.1688	0.46784	0.445107	3.76677	0.463442	2	0.65113	0.874957	0.551868	0.705572	1	3	-1.05711
CN(C)c1ccc(-c2cc3cc(-c4nc5cc([N+](=O)[O-])ccc5o4)c(O)cc3o2)cc1	2.595	-6.13744	3.71234	98.5292	0.0597153	1.02162	4.59816	0.769507	2	0.102274	0.998127	0.915463	0.940414	1	3	2.68889
O=c1c(O)c(-c2nc3ccc(-c4ccc(-c5ccccc5)cc4)cc3[nH]2)oc2ccc(-c3ccc(-c4ccccc4)cc3)cc12	2.596	-8.01053	3.97216	97.6117	0.41272	0.496703	3.41472	0.72318	2	0.96033	0.999007	0.891447	0.000579793	1	3	-1.49618
CCN(CC)c1ccc(-c2ccc3c(c2)C(=O)c2cc(NC(C)(C)C)cc(O)c2C3=O)cc1	2.597	-8.47988	4.24169	98.6635	0.819725	0.853565	6.47641	0.366346	1.5	0.45024	0.995336	0.946894	0.154279	1.5	3	3.63764
O=C1c2ccccc2C(=O)c2c(O)cc(-c3ccc(N(c4ccccc4)[N+](=O)[O-])cc3)cc21	2.598	-7.20545	3.95246	98.126	0.0121499	1.0134	2.23978	0.76388	2	0.295391	0.999653	0.997238	0.987286	1	3	3.50341
Oc1ccc(-c2ccccc2N(c2ccccc2)c2ccccc2)cc1-c1ncc(-c2ccc(C(F)(F)F)cc2)o1	2.602	-8.8991	4.74819	98.4614	0.93466	0.32861	5.53078	0.668834	1.5	0.413027	0.952833	0.0328232	0.897146	1.5	3	1.21664
CCCCN(CCCC)c1ccc(-c2ccc3c(c2)C(=O)c2cc(-c4ccc(-c5ccccc5)cc4)cc(O)c2C3=O)cc1	2.603	-10.7681	5.23046	99.5604	1.14338	0.252473	3.60891	0.479326	2	0.976545	0.998213	0.962526	0.0532955	1	3	2.66986
O=C1c2cc(-c3ccc(-c4ccc(-c5ccccc5)cc4)cc3O)ccc2C(=O)c2c(O)cc(-c3ccc(C(F)(F)F)cc3)cc21	2.604	-10.8555	4.93125	98.0705	1.07683	0.457712	2.76692	0.991563	2	0.939981	0.999539	0.908181	0.00294685	1	3	0.186982
COc1ccc(C(C)(C)C)cc1-c1nc2sc(-c3ccccc3O)nc2s1	2.608	-6.8491	3.77014	98.6882	0.174778	1.01837	6.07077	0.731751	1.5	0.108958	0.983487	0.359112	0.785189	1.5	3	-7.53515
N#CC(C#N)=Cc1cc(Cl)ccc1NC(=O)c1nc2ccccc2s1	2.611	-5.40962	3.41953	99.1989	-0.335901	0.477818	2.97513	0.767104	2	0.225654	0.998652	0.891646	0.824984	1	3	-10.3643
Nc1cc(=O)oc2c(-c3cccc4ccc5cccnc5c34)c(O)ccc12	2.613	-5.09	3.14426	95.3362	-0.147896	4.42174	2.15012	0.973385	2	0.146204	0.993111	0.949525	0.734719	1	3	-1.36634
COc1cc(-c2ccccc2)ccc1-c1nc2sc(-c3cc(C(C)(C)C)ccc3O)nc2s1	2.618	-7.97769	3.81183	98.7405	0.445246	0.855233	5.21634	0.801069	1.5	0.33645	0.991739	0.377242	0.427675	1.5	3	-4.96525
CCN(CC)c1ccc(-c2cc(O)c3c(c2)C(=O)c2cc(C(=O)C(F)(F)F)ccc2C3=O)cc1	2.623	-7.11258	4.12273	98.3427	0.680203	1.03939	5.04229	0.485447	1.5	0.235815	0.994124	0.935053	0.345851	1.5	3	4.35312
COc1ccc(-c2ccccc2)cc1-c1nc2sc(-c3cc(C(C)(C)C)ccc3O)nc2s1	2.623	-7.92121	3.76446	98.8821	0.472672	0.792358	5.17721	0.795898	1.5	0.365649	0.989124	0.370916	0.372305	1.5	3	-6.62922
COc1ccc(C(C)(C)C)cc1-c1nc2sc(-c3cc(-c4ccccc4)ccc3O)nc2s1	2.623	-7.92222	3.77455	98.9668	0.481401	0.77932	5.72155	0.853247	1.5	0.402524	0.990777	0.36323	0.459747	1.5	3	-6.38152
CCN(CC)c1ccc(-c2ccc3nc(-c4ccc(-c5ccc(-c6nc7ccccc7s6)cc5)cc4O)sc3c2)cc1	2.631	-8.76047	4.24691	99.3605	0.734863	0.453586	3.44567	0.441615	2	0.736164	0.998744	0.929752	0.0172433	1	3	6.33818
COc1ccc(C#N)cc1-c1nc2sc(-c3ccccc3O)nc2s1	2.632	-5.42869	3.58773	97.6252	0.0717681	2.38081	5.72371	0.968755	1.5	0.238613	0.987962	0.630275	0.87648	1.5	3	-4.35852
Oc1ccc(-c2ccc(Cl)cc2-c2cc3c4c(c2)CCCN4CCC3)cc1-c1nc2ccccc2[nH]1	2.632	-7.36112	3.70837	98.7663	0.319461	0.55824	4.90252	0.370991	2	0.937448	0.992015	0.898195	0.117973	1	3	1.51697
CCCCN(CCCC)c1ccc(-c2oc3ccccc3c(=O)c2O)s1	2.634	-4.8879	4.46833	99.0853	0.108755	0.486403	4.88578	0.482355	2	0.652737	0.873626	0.477071	0.948677	1	3	1.73094
COc1ccc(-c2ccc3c(c2)C(=O)c2cccc(O)c2C3=O)cc1-c1ccc(-c2ccc(C(C)(C)C)c(O)c2)cc1	2.635	-8.48051	3.72127	99.1014	0.752249	0.34412	2.31466	0.954747	2	0.81962	0.997425	0.876062	0.0242533	1	3	0.353137
CCCCN(CCCC)c1cc(O)c2c(ccc3cc(-c4ccc(C(F)(F)F)cc4)cnc32)c1	2.636	-6.91341	4.39819	99.2496	0.881995	0.250469	6.58509	0.289314	1.5	0.941859	0.792993	0.367552	0.212643	1.5	3	-3.47686
CCN(CC)c1ccc(-c2ccc3c(c2)C(=O)c2cccc(O)c2C3=O)cc1-c1cc(C)c(C)c(C)c1	2.64	-9.06536	4.61684	99.1119	0.892941	0.630201	4.4533	0.462629	2	0.571826	0.994551	0.963647	0.316317	1	3	8.04808
CCN(CC)c1ccc(-c2ccc3nc(-c4nc5cc(-c6ccc([N+](=O)[O-])cc6)ccc5o4)[nH]c3c2)cc1	2.644	-6.68237	3.71621	98.2434	0.23809	0.886349	4.30335	0.568324	2	0.735942	0.99929	0.980879	0.171724	1	3	0.146139
N#CC(C#N)=Cc1ccc(-c2ccc(-c3nc4ccc(-c5ccc(-c6ccccc6)cc5)cc4o3)c(O)c2)cc1	2.647	-8.73669	4.49924	98.9351	-0.107132	0.362673	3.17291	0.774702	2	0.689204	0.998379	0.880994	0.315512	1	3	-0.854904
CCN(CC)c1ccc2cc(-c3ccc4c(c3)C(=O)c3cc(-c5ccc(C)cc5)cc(O)c3C4=O)oc2c1	2.652	-8.97733	4.13053	98.553	0.909128	0.874091	2.94477	0.720005	2	0.249561	0.99746	0.958729	0.711745	1	3	3.33555
CCCCN(CCCC)c1ccc(-c2cc3cc(-c4nc5cc(C)ccc5o4)c(O)cc3o2)cc1	2.663	-7.69147	5.13289	98.775	0.390661	0.60145	3.7727	0.526502	2	0.620535	0.833422	0.406275	0.775636	1	3	4.17255
CCN(CC)c1ccc(-c2nc3sc(-c4nc5ccccc5[nH]4)nc3s2)cc1	2.665	-5.9598	3.5915	98.5647	0.0981749	0.935089	4.99122	0.568657	2	0.141525	0.997649	0.876926	0.875615	1	3	-8.56325
CCN(CC)c1ccc(-c2cc3cc(-c4nc5cc([N+](=O)[O-])ccc5o4)c(O)cc3o2)cc1	2.669	-6.10516	3.59491	98.3035	0.113225	1.11717	4.27649	0.645017	2	0.0981152	0.998066	0.920262	0.948907	1	3	0.997589
N#CC(C#N)=Cc1ccc(-c2ccc3nc(-c4nc5ccccc5o4)[nH]c3c2)cc1	2.669	-6.55622	3.85074	98.5713	-0.429601	0.739997	3.39073	0.854206	2	0.315951	0.983724	0.892487	0.629903	1	3	-9.39431
CNc1ccc(-c2nc3sc(-c4cc(C(C)(C)C)ccc4O)nc3s2)cc1	2.67	-6.05897	2.97964	98.4979	0.222643	1.05565	5.71557	0.743537	1.5	0.140166	0.990555	0.515488	0.743776	1.5	3	-6.4772
CCN(CC)c1ccc(-c2ccc(-c3nc4ccc(O[N+](=O)[O-])cc4o3)c(O)c2)cc1	2.671	-5.84267	3.35121	98.492	-0.224607	0.928492	4.71246	0.471378	2	0.381729	0.999973	0.324237	0.966531	1	3	10.7191
CCN(CC)c1ccc(-c2ccc3nc(-c4nc5cc(-c6ccc(C(F)(F)F)cc6)ccc5o4)[nH]c3c2)cc1	2.672	-6.12143	3.91154	97.5769	0.833968	1.15179	5.30788	0.570443	1.5	0.784783	0.973149	0.598458	0.00606552	1.5	3	-3.23574
COc1ccc(C(C)(C)C)cc1-c1nc2sc(-c3cc(C)ccc3O)nc2s1	2.672	-7.16707	3.58558	98.4594	0.255033	1.2607	5.90936	0.829443	1.5	0.11459	0.984493	0.360264	0.809879	1.5	3	-7.64822
CCN(CC)c1ccc(-c2ccc3c(c2)C(=O)c2cc(-c4ccc(-c5cc(C)c(C)c(C)c5)cc4)cc(O)c2C3=O)cc1	2.68	-10.1293	4.6549	98.8799	0.957077	0.657457	4.84541	0.459043	2	0.786824	0.999669	0.986848	0.0315488	1	3	2.25962
Cc1cc(-c2ccc3nc(-c4cc(O)c5c(c4)C(=O)c4cc(-c6ccccc6)ccc4C5=O)[nH]c3c2)cc(C)c1C	2.681	-9.63766	3.86433	99.124	0.993597	0.515308	3.80056	0.627497	2	0.815709	0.999764	0.981337	0.107564	1	3	1.88137
CCCCN(CCCC)c1ccc(-c2ccc3c(c2)C(=O)c2cc(-c4ccc(C(F)(F)F)cc4)cc(O)c2C3=O)cc1	2.682	-9.98453	4.64871	99.8603	1.27399	0.183694	4.51338	0.511058	2	0.959022	0.991903	0.806685	0.0653846	1	3	3.98962
CCN(CC)c1ccc(-c2ccc3c(c2)C(=O)c2cc(-c4ccc(-c5ccc(-c6ccccc6)cc5)cc4O)cc(O)c2C3=O)cc1	2.683	-9.90894	4.58508	98.5345	0.609954	0.452283	3.18634	0.662212	2	0.870292	0.999787	0.990172	0.0090434	1	3	4.4574
CCN(CC)c1ccc(-c2ccc3c(c2)C(=O)c2cc(N[N+](=O)[O-])cc(O)c2C3=O)cc1	2.687	-6.72	3.51773	98.5302	0.290371	0.99229	3.9535	0.565823	2	0.2618	0.999865	0.992904	0.97249	1	3	5.41065
CCCCN(CCCC)c1ccc(-c2cc(O)c3c(ccc4cc(-c5ccc(C(F)(F)F)cc5)cnc43)c2)cc1	2.688	-7.67371	4.43402	99.2075	0.873206	0.237444	5.70839	0.359728	1.5	0.979662	0.93707	0.469058	0.0348072	1.5	3	0.214849
CCCCN(CCCC)c1ccc(-c2cc3cc(-c4nc5cc(-c6ccccc6)ccc5o4)c(O)cc3o2)cc1	2.691	-8.27451	5.25809	99.0823	0.602438	0.365324	3.33459	0.580412	2	0.795782	0.927604	0.428896	0.502258	1	3	5.02758
CCN(CC)c1ccc(-c2ccc(N)cc2-c2ccc(-c3nc4ccc(C(F)(F)F)cc4o3)c(O)c2)cc1	2.694	-6.45568	3.40777	97.8311	0.813121	1.52284	5.78613	0.423092	1.5	0.423189	0.946117	0.769304	0.0509333	1.5	3	6.98409
CCN(CC)c1ccc(-c2ccc3c(c2)C(=O)c2cc(-c4ccc(-c5ccc(-c6ccccc6)c(O)c5)cc4)cc(O)c2C3=O)cc1	2.696	-10.0432	4.59718	98.3341	0.853654	0.648656	2.34859	0.66134	2	0.857072	0.999736	0.989455	0.0140043	1	3	6.07557
N#CC(C#N)=Cc1ccc(-c2ccc(-c3nc4ccc([N+](=O)[O-])cc4o3)c(O)c2)cc1	2.697	-6.55188	3.67713	98.9304	-0.36638	0.612624	3.36	0.898501	2	0.194966	0.999124	0.957218	0.98924	1	3	-0.821627
CCCCN(CCCC)c1ccc2oc(-c3ccc(-c4nc5cc(-c6ccccc6)ccc5o4)cc3)c(O)c(=O)c2c1	2.7	-6.10966	4.69404	99.0267	0.349367	0.355278	1.93623	0.988498	2	0.788536	0.959247	0.421722	0.366263	1	3	10.9054
CCN(CC)c1ccc(-c2ccc3c(c2)C(=O)c2cc(-c4ccc(C(F)(F)F)cc4O)cc(O)c2C3=O)cc1	2.703	-7.58813	3.72381	98.6463	0.664894	0.67178	5.44306	0.645705	1.5	0.483778	0.994783	0.912933	0.0572775	1.5	3	4.70411
CCN(CC)c1ccc(-c2ccc3c(c2)C(=O)c2cc(-c4nc5ccc(-c6ccccc6)cc5[nH]4)cc(O)c2C3=O)cc1	2.705	-8.64159	3.7924	98.8567	0.945364	0.549609	3.54357	0.512599	2	0.73544	0.999749	0.991108	0.0671892	1	3	4.67812
CN(C)c1ccc(-c2ccc(-c3ccc4c(c3)C(=O)c3cc(-c5ccc(C(F)(F)F)cc5)cc(O)c3C4=O)cc2O)cc1	2.708	-9.45612	3.73764	98.5811	1.01311	0.504114	3.40048	0.902684	2	0.784914	0.998901	0.933801	0.0134091	1	3	3.22948
N#CC(C#N)=Cc1ccc(-c2ccc3c(c2)C(=O)c2cc(-c4ccc(N)cc4)cc(O)c2C3=O)cc1	2.709	-8.83266	3.85804	98.2801	-0.0860446	1.28595	2.87452	0.995766	2	0.288797	0.999665	0.99755	0.754036	1	3	1.7896
CCN(CC)c1ccc(-c2nc3sc(-c4cc(-c5cccc(O)c5)ccc4O)nc3s2)cc1	2.712	-6.26792	2.95502	98.2697	0.171063	1.33625	4.17833	0.856371	2	0.205938	0.990572	0.812476	0.700787	1	3	3.88055
CCCCN(CCCC)c1ccc(-c2ccc(-c3nc4ccc(N(c5ccccc5)c5ccccc5)cc4o3)c(O)c2)cc1	2.712	-9.31823	5.51422	99.4631	0.814882	0.198795	3.05423	0.466837	2	0.808585	0.895525	0.178078	0.958497	1	3	8.6964
CCN(CC)c1ccc(-c2nc3sc(-c4cc(-c5ccccc5O)ccc4O)nc3s2)cc1	2.714	-6.45209	3.02975	98.6073	0.171278	0.891654	3.71856	0.739995	2	0.0993496	0.983154	0.795206	0.750805	1	3	1.34928
COc1ccc(C(C)(C)C)cc1-c1nc2sc(-c3nc4ccccc4[nH]3)nc2s1	2.718	-6.53595	4.09716	98.6638	0.291085	1.11199	5.56005	0.789187	1.5	0.27642	0.996198	0.492351	0.792546	1.5	3	-6.42425
CCN(CC)c1ccc(-c2cc3cc(-c4nc5cc(-c6ccc([N+](=O)[O-])cc6)ccc5o4)c(O)cc3o2)cc1	2.72	-7.11332	3.91864	98.2981	0.286218	1.01949	3.66343	0.604307	2	0.296636	0.999319	0.948527	0.774566	1	3	3.382
CCCCN(CCCC)c1ccc(-c2ccc3c(c2)C(=O)c2cc(-c4cc(C)c(C)c(C)c4)cc(O)c2C3=O)cc1	2.72	-10.3328	5.2654	99.3479	1.04585	0.438465	4.24035	0.430624	2	0.939247	0.995829	0.949893	0.256136	1	3	4.21519
N#CC(C#N)=Cc1ccc(-c2ccc3nc(-c4nc5cc(-c6ccccc6)ccc5o4)[nH]c3c2)cc1	2.721	-7.27056	4.10273	98.6336	-0.266278	0.566153	3.23132	0.920385	2	0.540256	0.994213	0.896528	0.405854	1	3	-6.94616
CCCCN(CCCC)c1ccc2oc(N(CC)CC)c(O)c(=O)c2c1	2.728	-5.38161	4.50886	98.2996	0.385654	1.41368	6.38654	0.301504	1.5	0.483091	0.44977	0.377718	0.774227	1.5	3	-3.15426
CN(C)c1ccc(-c2nc3sc(-c4ccc5c(c4)C(=O)c4cccc(O)c4C5=O)nc3s2)cc1	2.729	-8.45129	3.89924	98.753	0.643138	1.07766	2.67752	0.951346	2	0.0945836	0.999815	0.976389	0.724631	1	3	7.66776
CCN(CC)c1ccc(-c2nc3sc(-c4cc(C(C)(C)C)ccc4O)nc3s2)cc1	2.732	-7.14095	3.33676	98.5787	0.170322	0.957277	5.57138	0.663176	1.5	0.101409	0.982237	0.535459	0.764209	1.5	3	0.353748
CN(C)c1ccc(-c2ccc(-c3nc4ccc(C=C(C#N)C#N)cc4[nH]3)c(O)c2)cc1	2.732	-5.84466	3.33638	98.4112	-0.380502	0.898984	4.53176	0.658574	2	0.300817	0.992982	0.962757	0.540858	1	3	2.4475
CCN(CC)c1ccc(-c2oc3ccc(-c4ccc(C=C(C#N)C#N)cc4)cc3c(=O)c2O)cc1	2.732	-6.10461	3.58862	98.7659	-0.467489	0.586051	4.28548	0.741336	2	0.107614	0.990122	0.910985	0.852971	1	3	4.26958
CCN(CC)c1ccc(-c2ccc3oc(-c4ccc(C=C(C#N)C#N)cc4)c(O)c(=O)c3c2)cc1	2.732	-6.12705	3.61403	98.7941	-0.465669	0.556267	4.26954	0.719463	2	0.114805	0.990814	0.909326	0.794467	1	3	10.6278
CCN(CC)c1ccc(-c2ccc(-c3nc4ccc(C=CC(F)(F)F)cc4o3)c(O)c2)cc1	2.736	-6.19205	3.34621	98.2862	0.152371	1.05635	6.14886	0.422456	1.5	0.343058	0.645509	0.709613	0.491095	1.5	3	10.5594
CCN(CC)c1ccc(-c2cc(O)c3c(c2)C(=O)c2cc(-c4nc5ccc(Oc6ccccc6)cc5o4)ccc2C3=O)cc1	2.74	-9.25001	4.17019	98.6644	0.889805	0.779604	2.00908	0.909268	2	0.533844	0.999505	0.975699	0.347186	1	3	5.47276
CCCCN(CCCC)c1ccc(-c2ccc3c(c2)C(=O)c2cc(-c4ccc(N(CC)CC)cc4)cc(O)c2C3=O)cc1	2.741	-11.0266	5.32696	98.9387	0.933693	0.580074	4.17074	0.362747	2	0.900824	0.995327	0.974451	0.22087	1	3	4.10259
O=C1c2cc(-c3cc4cc5c6c(c4o3)CCCN6CCC5)ccc2C(=O)c2c(O)cccc21	2.745	-8.85869	4.26895	97.9804	0.717284	1.50261	3.12937	0.581217	2	0.194323	0.988971	0.949394	0.834853	1	3	6.76843
CCN(CC)c1ccc(-c2oc3cc(-c4ccc(C=C(C#N)C#N)cc4)ccc3c(=O)c2O)cc1	2.745	-5.97854	3.58077	98.635	-0.468302	0.67444	4.31683	0.702871	2	0.12344	0.990368	0.926961	0.836509	1	3	3.47445
CC(C)(C)c1ccc(O)c(-c2nc3sc(-c4cc(C#N)ccc4-c4ccccc4)nc3s2)c1	2.745	-7.61887	3.72378	99.0513	0.49865	0.686186	4.56706	0.985252	2	0.583092	0.985565	0.302293	0.701506	1	3	-2.81945
CCN(CC)c1ccc(-c2cc3cc(-c4nc5cc(N(CC)CC)ccc5o4)c(O)cc3o2)cc1	2.748	-6.53303	3.92803	98.0775	0.284924	1.20939	4.11948	0.500681	2	0.0682575	0.940245	0.763602	0.711117	1	3	9.14689
N#CC(C#N)=Cc1ccc(-c2cc3cc(-c4nc5ccccc5o4)c(O)cc3o2)cc1	2.748	-6.97166	3.951	99.0225	-0.373724	0.541597	3.06296	0.899194	2	0.0768713	0.989891	0.756763	0.950484	1	3	1.86624
N#CC(C#N)=Cc1ccc(-c2cc3cc(-c4nc5ccccc5s4)c(O)cc3o2)cc1	2.748	-7.53738	4.2914	99.4166	-0.26035	0.398975	2.99944	0.879946	2	0.092565	0.991527	0.84381	0.937779	1	3	0.101837
CCN(CC)c1ccc(-c2ccc3c(c2)C(=O)c2cc(-c4nc5ccc(Oc6ccccc6)cc5[nH]4)cc(O)c2C3=O)cc1	2.752	-8.44814	3.99082	98.9772	0.963258	0.523754	3.09675	0.532598	2	0.752774	0.999732	0.993792	0.164853	1	3	5.01745
CCN(CC)c1ccc(-c2ccc3c(c2)C(=O)c2cc(-c4nc5cc([N+](=O)[O-])ccc5o4)cc(O)c2C3=O)cc1	2.758	-8.67781	4.00674	98.0785	0.506526	1.37866	3.6386	0.683967	2	0.28198	0.999963	0.994311	0.780681	1	3	7.47239
CNc1ccc(C=C(C#N)C#N)cc1-c1nc2ccc(-c3ccc([N+](=O)[O-])cc3)cc2o1	2.758	-7.11962	3.81301	98.6339	-0.352441	0.843703	3.76276	0.831697	2	0.249715	0.999717	0.976498	0.968563	1	3	-0.506837
CNc1ccc(-c2nc3ccccc3s2)cc1-c1nc2sc(-c3ccccc3O)nc2s1	2.761	-8.51329	4.29536	98.127	0.549167	1.26149	4.0278	0.612615	2	0.104597	0.999284	0.787887	0.82919	1	3	-4.37425
N#CC(C#N)=Cc1ccc(-c2ccc3oc(-c4nc5ccccc5s4)c(O)c(=O)c3c2)cc1	2.761	-6.41052	3.75118	99.2629	-0.324981	0.40897	3.02073	0.972951	2	0.127803	0.992434	0.897839	0.925886	1	3	-1.27459
CCN(CC)c1ccc2cc(-c3ccc4c(c3)C(=O)c3cc(-c5ccc([N+](=O)[O-])cc5)cc(O)c3C4=O)oc2c1	2.767	-8.96605	4.2328	98.2697	0.673386	1.10561	3.26625	0.739944	2	0.275511	0.999924	0.995139	0.932931	1	3	5.3605
CCCCN(CCCC)c1ccc(-c2ccc3c(c2)C(=O)c2cc(-c4ccc(-c5ccc([N+](=O)[O-])cc5)cc4)cc(O)c2C3=O)cc1	2.769	-10.9753	5.17124	99.2416	0.962351	0.318412	3.32219	0.547495	2	0.984597	0.999953	0.995527	0.26372	1	3	1.30171
COc1ccc(-c2ccc(-c3nc4ccc(-c5nc6scnc6s5)cc4o3)c(O)c2)cc1	2.77	-7.04364	4.05425	98.5094	0.334938	1.22539	3.96491	0.58222	2	0.330442	0.999568	0.751377	0.441801	1	3	5.59519
CCN(CC)c1ccc(-c2oc3cc(C=C(C#N)C#N)ccc3c(=O)c2O)cc1	2.773	-5.33186	3.26495	98.3372	-0.522914	0.925518	4.70451	0.706829	2	0.0442314	0.979952	0.911511	0.876368	1	3	-1.53723
N#CC(C#N)=Cc1ccc(-c2ccc3c(c2)C(=O)c2cccc(O)c2C3=O)s1	2.774	-7.40106	3.79126	98.7129	-0.0704467	0.814217	2.79041	0.957198	2	0.177775	0.99972	0.992025	0.902017	1	3	-2.92205
CCN(CC)c1ccc2cc(-c3ccc4c(c3)C(=O)c3cc(-c5ccc(C(C)(C)C)cc5)cc(O)c3C4=O)oc2c1	2.777	-9.30437	4.0904	99.3982	0.929425	0.414273	3.95696	0.697298	2	0.319823	0.997649	0.895989	0.494817	1	3	1.82469
CCN(CC)c1ccc(-c2nc3sc(-c4cc(-c5nc6ccccc6o5)ccc4O)nc3s2)cc1	2.781	-6.97584	3.70808	98.4149	0.392867	1.15565	3.03913	0.852305	2	0.0955805	0.997903	0.768902	0.731618	1	3	4.33576
CCN(CC)c1ccc2cc(-c3oc4ccc(-c5cc(C)c(C)c(C)c5)cc4c(=O)c3O)oc2c1	2.782	-5.87391	4.07059	98.3325	0.222628	1.07797	5.94107	0.557671	1.5	0.230978	0.936185	0.779903	0.414188	1.5	3	6.74364
CCN(CC)c1ccc(-c2nc3sc(-c4cc(-c5ccc(-c6ccccc6)c(O)c5)ccc4O)nc3s2)cc1	2.783	-7.59273	2.98672	98.8991	0.464495	0.69347	2.31498	0.935178	2	0.383533	0.997678	0.848025	0.408521	1	3	2.41388
CCN(CC)c1ccc(-c2ccc3oc(-c4nc5cc(-c6ccc([N+](=O)[O-])cc6)ccc5o4)c(O)c(=O)c3c2)cc1	2.784	-5.60548	3.17224	98.6089	-0.0968044	0.734987	3.67142	0.728829	2	0.488605	0.998347	0.974701	0.311884	1	3	6.41319
CCN(CC)c1ccc(-c2ccc3nc(-c4nc5cc(-c6ccc(-c7nc8ccccc8s7)cc6)ccc5o4)[nH]c3c2)cc1	2.785	-8.30799	4.37165	98.7337	0.753484	0.668644	3.08446	0.540147	2	0.779516	0.998241	0.91955	0.00770438	1	3	-2.81241
CCCCN(CCCC)c1nc2ccc(-c3ccc(-c4nc5cc(C(F)(F)F)ccc5o4)c(O)c3)cc2s1	2.786	-7.50447	4.43208	100.266	0.863775	0.102364	4.332	0.508728	2	0.950984	0.968231	0.185259	0.739652	1	3	0.0610252
CCN(CC)c1ccc(-c2ccc(-c3nc4ccc(C=C(C#N)C#N)cc4o3)c(O)c2)cc1	2.79	-6.8672	3.50429	98.6751	-0.423564	0.707031	4.49209	0.553083	2	0.125412	0.989196	0.896692	0.784278	1	3	9.36868
CCN(CC)c1ccc(-c2ccc3c(c2)C(=O)c2cc(C=C(C#N)C#N)cc(O)c2C3=O)cc1	2.792	-8.46575	4.10126	98.5997	-0.141463	0.772413	3.75683	0.783209	2	0.141607	0.999081	0.993473	0.805465	1	3	5.24888
CC(C)(C)Oc1cc(O)c2c(c1)C(=O)c1cc(-c3ccc(C=C(C#N)C#N)cc3)ccc1C2=O	2.793	-7.86962	3.60827	99.5242	0.125533	0.273987	3.49279	0.994732	2	0.189549	0.994593	0.935767	0.762902	1	3	0.130626
N#CC(C#N)=Cc1ccc(-c2cc3cc(-c4nc5cc(-c6ccccc6)ccc5o4)c(O)cc3o2)cc1	2.795	-8.17055	4.40983	98.9071	-0.216781	0.485711	2.86141	0.910983	2	0.17558	0.995355	0.767148	0.863878	1	3	4.6133
CCN(CC)c1ccc(-c2cc(O)c3c(c2)C(=O)c2cc(C=C(C#N)C#N)ccc2C3=O)cc1	2.8	-8.29997	4.16108	98.4508	-0.18261	0.987061	4.19676	0.640152	2	0.105414	0.998856	0.990357	0.901999	1	3	7.75209
COc1ccc(C#N)cc1-c1nc2sc(-c3cc(C(C)(C)C)ccc3O)nc2s1	2.8	-6.67173	3.30496	98.5451	0.34359	1.13206	5.16382	1.06697	2	0.403517	0.978311	0.322223	0.773412	1	3	-4.92897
COc1ccc(C(C)(C)C)cc1-c1nc2sc(-c3cc(C#N)ccc3O)nc2s1	2.8	-6.57708	3.32675	98.6299	0.401506	1.08897	5.89096	1.04674	2	0.390655	0.986932	0.312406	0.740928	1	3	-6.04557
COc1cc(C#N)ccc1-c1nc2sc(-c3cc(C(C)(C)C)ccc3O)nc2s1	2.801	-6.71531	3.33863	98.4718	0.324255	1.20831	5.26487	1.16789	2	0.378833	0.982293	0.30727	0.769995	1	3	-5.27391
CN(C)c1ccc(-c2nc3ccc(-c4ccc5c(c4)C(=O)c4cc(-c6ccc(C(F)(F)F)cc6)cc(O)c4C5=O)cc3[nH]2)cc1	2.805	-8.94688	3.52703	98.9264	1.24725	0.526227	4.13415	0.737753	2	0.864003	0.999747	0.968921	0.00938673	1	3	7.44173
O=C1c2cc(-c3ccc(-c4nc5ccc(-c6ccc(N(c7ccccc7)c7ccccc7)cc6)cc5s4)cc3)ccc2C(=O)c2c(O)cccc21	2.806	-13.626	6.49394	99.6468	1.2902	0.275327	0.433929	1.06785	2.5	0.730785	0.999832	0.936741	0.403898	0.5	3	6.21338
CCCCN(CCCC)c1ccc(-c2cc3cc(-c4nc5ccc(C(C)(C)C)cc5o4)c(O)cc3o2)cc1	2.809	-8.92779	5.73447	98.9876	0.458919	0.484833	4.551	0.496366	2	0.70842	0.81777	0.165546	0.703461	1	3	3.51586
CC(C)(C)N(c1ccccc1)c1ccc2nc(-c3cc(O)c4c(c3)C(=O)c3ccccc3C4=O)[nH]c2c1	2.813	-6.89747	4.5052	99.0421	0.572367	0.574928	3.919	0.600785	2	0.170247	0.995898	0.878884	0.761188	1	3	-0.177199
CCCCN(CCCC)c1ccc(-c2ccc3c(c2)C(=O)c2cc(-c4ccc(-c5nc6ccccc6o5)cc4)cc(O)c2C3=O)cc1	2.814	-10.297	5.26722	99.2832	1.05803	0.372527	1.65815	0.886693	2	0.942928	0.999174	0.944007	0.11452	1	3	2.48448
CCN(CC)c1ccc(-c2cc(O)c3c(c2)C(=O)c2cc(-c4cc5c6c(c4)CCCN6CCC5)ccc2C3=O)cc1	2.815	-9.36148	4.67097	97.9588	0.773095	1.72456	4.06052	0.345334	2	0.702684	0.998886	0.989841	0.22713	1	3	6.25633
CCCCN(CCCC)c1ccc(-c2cc3cc(-c4nc5cc(-c6cccc(O)c6)ccc5o4)c(O)cc3o2)cc1	2.815	-7.15672	4.48949	98.6099	0.334505	0.72898	2.44279	0.873988	2	0.779117	0.880361	0.433858	0.612928	1	3	5.01528
CCN(CC)c1ccc(-c2ccc3c(c2)C(=O)c2cccc(O)c2C3=O)cc1-c1ccc(-c2cc(C(C)(C)C)ccc2O)cc1	2.818	-9.61221	4.29541	99.0294	0.844603	0.624251	2.5889	0.730047	2	0.726502	0.994511	0.916756	0.0576786	1	3	4.07097
Cc1ccc2oc(-c3cc4cc(-c5ccc(C=C(C#N)C#N)cc5)oc4cc3O)nc2c1	2.818	-6.76518	3.67481	99.1141	-0.349973	0.504558	3.10062	0.920017	2	0.0820433	0.98819	0.750119	0.956029	1	3	4.35679
Cc1cc(-c2oc3ccc(C=C(C#N)C#N)cc3c(=O)c2O)cc(C)c1C	2.819	-5.09239	3.10248	98.7753	-0.453446	0.700224	4.91973	0.822824	2	0.0574726	0.968552	0.794036	0.900583	1	3	-5.57529
CN(C)c1cc(O)c2c(c1)C(=O)c1cc(C=C(C#N)C#N)ccc1C2=O	2.822	-6.4679	3.31597	98.13	-0.279307	1.30581	4.17141	0.89936	2	0.0539671	0.996692	0.982915	0.963654	1	3	5.06608
Cc1ccc(C#N)cc1-c1nc2sc(-c3cc(C(C)(C)C)ccc3O)nc2s1	2.825	-6.83337	3.32237	98.7253	0.211289	0.863614	5.03212	0.995444	1.5	0.322504	0.978401	0.281865	0.828222	1.5	3	-5.24731
Cc1cc(-c2cc(O)c3c(c2)C(=O)c2cc(C=C(C#N)C#N)ccc2C3=O)cc(C)c1C	2.825	-8.65225	3.64601	99.111	-0.1716	0.635036	3.70903	0.895697	2	0.166715	0.998978	0.980773	0.917701	1	3	2.70691
CCN(CC)c1ccc(-c2ccc3c(c2)C(=O)c2cc(-c4nc5ccc(-c6ccc(-c7ccccc7)cc6)cc5s4)cc(O)c2C3=O)cc1	2.826	-11.83	4.94422	99.4753	1.02201	0.39612	3.00456	0.52806	2	0.875792	0.999956	0.991953	0.00729729	1	3	4.23278
Oc1cc(-c2nc3sc(N(c4ccccc4)c4ccccc4)nc3s2)cc2ccc3cccnc3c12	2.831	-8.07994	3.95916	98.9529	0.111562	0.470552	2.84678	0.548244	2	0.20386	0.999645	0.759554	0.951801	1	3	2.30733
O=CNc1cccc2c1-c1nc3cccc4c3c(c1C2)CC4	2.834	-5.18469	3.19715	97.0585	0.511009	2.63359	5.43673	0.642068	1.5	0.255961	0.666557	0.945684	0.816247	1.5	3	-7.78962
N#CC(C#N)=Cc1ccc2nc(-c3ccc(-c4nc5ccc(-c6ccccc6)cc5o4)c(O)c3)oc2c1	2.836	-8.14217	4.5386	98.6483	-0.218546	0.736488	2.74953	0.95639	2	0.172622	0.997095	0.75092	0.770336	1	3	3.17125
CCN(CC)c1ccc2cc(-c3nc4sc(-c5cc(-c6ccccc6)ccc5O)nc4s3)oc2c1	2.845	-7.2675	3.72059	98.7231	0.557711	0.768513	4.43039	0.678772	2	0.190718	0.996103	0.783298	0.835922	1	3	4.6461
CCN(CC)c1ncc(-c2ccc3c(c2)C(=O)c2cc(-c4ccc([N+](=O)[O-])cc4)cc(O)c2C3=O)o1	2.846	-7.68445	3.77683	99.1227	0.371867	0.513391	3.83766	0.889752	2	0.401824	0.999928	0.990193	0.579407	1	3	4.25774
CCN(CC)c1ccc(OC)c(-c2nc3sc(-c4cc(C(C)(C)C)ccc4O)nc3s2)c1	2.853	-6.9853	3.501	98.3423	0.331305	1.3318	5.80671	0.606196	1.5	0.122901	0.975074	0.477286	0.757187	1.5	3	-0.915503
CCCCN(CCCC)c1ccc(-c2cc3cc(-c4nc5cc(N(CC)CC)ccc5o4)c(O)cc3o2)cc1	2.856	-8.16191	5.00431	98.5561	0.468698	0.714659	3.56372	0.518078	2	0.521936	0.845988	0.542165	0.814474	1	3	10.3499
CCN(CC)c1ccc(-c2ccc3c(c2)C(=O)c2cccc(O)c2C3=O)cc1-c1ccc(-c2ccc(C(C)(C)C)c(O)c2)cc1	2.858	-9.30049	4.09038	99.1933	0.808841	0.441832	3.00382	0.629262	2	0.814553	0.997381	0.916885	0.0484383	1	3	4.35564
CCCCN(CCCC)c1ccc2cc(-c3cc4cc(-c5nc6ccccc6o5)c(O)cc4o3)oc2c1	2.861	-8.22323	5.39033	98.9116	0.371117	0.543328	3.33047	0.55929	2	0.648531	0.826594	0.474496	0.771018	1	3	8.17265
CCN(CC)c1cc(=O)oc2c(-c3cc(O)c4c(c3)C(=O)c3ccccc3C4=O)c(O)ccc12	2.864	-6.48613	3.89324	98.0196	0.229899	1.58937	2.36522	0.919741	2	0.092366	0.99258	0.931748	0.792562	1	3	6.25615
CCN(CC)c1ccc(C(C)(C)C)cc1-c1nc2sc(-c3ccccc3O)nc2s1	2.866	-7.25348	3.86302	99.1473	0.194456	0.644145	6.05267	0.507805	1.5	0.0885522	0.981286	0.448258	0.871655	1.5	3	-4.47354
CCN(CC)c1ccc(-c2ccccc2)cc1-c1nc2sc(-c3cc(C(C)(C)C)ccc3O)nc2s1	2.869	-9.01876	4.08543	99.3443	0.506392	0.480119	5.23043	0.577137	1.5	0.307011	0.988281	0.500592	0.627284	1.5	3	0.607998
CCN(CC)c1ccc(-c2ccc3oc(C=C(C#N)C#N)c(O)c(=O)c3c2)cc1	2.876	-5.96763	3.35635	98.5153	-0.43779	0.782714	4.70044	0.797458	2	0.10325	0.945457	0.913038	0.716199	1	3	3.93386
CCCCN(CCCC)c1ccc(-c2cc3cc(-c4nc5ccccc5o4)c(O)cc3o2)s1	2.878	-6.90919	4.58494	99.3804	0.455366	0.346273	3.88416	0.502467	2	0.697157	0.969346	0.413142	0.91865	1	3	9.55413
CCCCN(CCCC)c1ccc(-c2cc3cc(-c4nc5cc(-c6nc7ccccc7s6)ccc5o4)c(O)cc3o2)cc1	2.893	-9.4071	4.93346	99.4226	0.568815	0.354691	2.36142	0.690804	2	0.701994	0.984869	0.518128	0.552808	1	3	-1.25919
CNc1ccc(C(C)(C)C)cc1-c1nc2scnc2s1	2.902	-5.11636	3.32309	97.7913	0.409531	1.91662	7.31261	0.326386	1.5	0.154808	0.992241	0.459677	0.739389	1.5	3	-8.06965
CCN(CC)c1ccc(-c2cc(O)c3c(c2)C(=O)c2cc(-c4cc5cc([N+](=O)[O-])c(O)cc5o4)ccc2C3=O)cc1	2.913	-8.07647	3.89604	98.7057	0.128298	0.715585	3.07789	0.994552	2	0.0975805	0.999862	0.983828	0.846582	1	3	9.20768
CCN(CC)c1ccc(-c2nc3sc(Nc4ccc(-c5nc6ccc(-c7ccccc7)cc6o5)c(O)c4)nc3s2)cc1	2.918	-8.38649	3.23648	99.1668	0.606755	0.629159	2.96519	0.559191	2	0.400804	0.999745	0.777153	0.438605	1	3	6.38823
N#CC(C#N)=Cc1ccc(-c2cc3cc(-c4nc5cc([N+](=O)[O-])ccc5o4)c(O)cc3o2)cc1	2.922	-6.81648	3.54386	99.2085	-0.328249	0.468282	2.972	0.982846	2	0.0813982	0.999668	0.948879	0.995222	1	3	0.834762
CCN(CC)c1ccc(C(C)(C)C)cc1-c1nc2sc(-c3cc(C)ccc3O)nc2s1	2.923	-7.4929	3.72683	98.9635	0.313235	0.783024	5.99954	0.5966	1.5	0.0932055	0.982435	0.449001	0.887903	1.5	3	-3.47677
CCN(CC)c1ccc(-c2ccc3c(c2)C(=O)c2cc(-c4nc5ccc(-c6cc(C)c(C)c(C)c6)cc5[nH]4)cc(O)c2C3=O)cc1	2.925	-9.72196	3.99608	99.0471	0.964509	0.623711	4.03915	0.515508	2	0.779003	0.999871	0.991762	0.0705531	1	3	6.85343
CCCCN(CCCC)c1ccc2cc(-c3cc4cc(-c5nc6cc(C)ccc6o5)c(O)cc4o3)oc2c1	2.927	-8.86998	5.65321	98.8257	0.431477	0.600597	3.15085	0.635777	2	0.66454	0.802894	0.465608	0.792011	1	3	8.65016
O=C1c2cc(-c3cc(O)c4c(ccc5cccnc54)c3)ccc2C(=O)c2c(O)cc(N[N+](=O)[O-])cc21	2.928	-6.31236	2.93629	97.6377	-0.065401	1.88453	1.47456	1.08032	2.5	0.418788	0.999989	0.996504	0.989227	0.5	3	3.13426
N#CC(C#N)=Cc1ccc(-c2ccc3nc(-c4oc5ccc(-c6ccc(-c7ccccc7)cc6)cc5c(=O)c4O)[nH]c3c2)cc1	2.929	-7.6782	3.56873	99.0596	-0.131532	0.28377	2.98658	0.92181	2	0.773672	0.999436	0.946298	0.0562818	1	3	-2.35303
CCN(CC)c1ccc2cc(-c3cc4cc(-c5nc6cc([N+](=O)[O-])ccc6o5)c(O)cc4o3)oc2c1	2.937	-6.33375	4.2541	98.3515	0.188687	1.01428	3.48602	0.73658	2	0.115185	0.997779	0.936564	0.948576	1	3	5.56838
O=c1c(O)c(-c2nc3scnc3s2)oc2ccccc12	2.939	-4.0797	2.37756	97.378	-0.331874	1.57312	4.33482	0.931549	2	0.0601281	0.995191	0.739982	0.923916	1	3	-2.54372
CCCCN(CCCC)c1ccc2cc(-c3cc4cc(-c5nc6cc(-c7ccccc7)ccc6o5)c(O)cc4o3)oc2c1	2.947	-9.51683	5.77403	99.1634	0.647457	0.321483	2.72149	0.70089	2	0.825189	0.912525	0.488812	0.526404	1	3	8.27945
N#CC(C#N)=Cc1ccc(Oc2cc3cc(-c4nc5cc(-c6ccccc6)ccc5o4)c(O)cc3o2)cc1	2.957	-7.99464	4.52719	98.9817	-0.245422	0.420089	2.70635	0.847903	2	0.307811	0.997851	0.800285	0.644957	1	3	4.16415
N#CC(C#N)=Cc1ccc(-c2ccc3c(c2)C(=O)c2cc(O[N+](=O)[O-])cc(O)c2C3=O)cc1	2.974	-7.21028	3.4367	98.7573	-0.207864	0.713752	2.64632	1.06719	2.5	0.356208	1	0.891069	0.998558	0.5	3	0.620635
CCN(CC)c1ccc2oc(-c3cc4cc(-c5ccc(C=C(C#N)C#N)cc5)oc4cc3O)nc2c1	2.988	-6.39499	3.21299	99.0236	-0.367867	0.547477	3.35763	0.795571	2	0.0563101	0.989232	0.838579	0.965048	1	3	13.7481
CCN(CC)c1ccc(-c2cc3cc(-c4nc5cc(C=C(C#N)C#N)ccc5o4)c(O)cc3o2)cc1	2.995	-6.31713	3.17988	98.8689	-0.393421	0.600374	3.73249	0.766912	2	0.0483607	0.993194	0.848904	0.879377	1	3	-1.02502
N#CC(C#N)=Cc1cnc2c(ccc3cc(-c4ccccc4-c4ccc5ccoc5c4)cc(O)c32)c1	2.997	-6.5756	3.72627	98.7576	-0.430916	0.502274	3.74304	0.728565	2	0.804973	0.999723	0.97821	0.0307034	1	3	-6.3019
COc1ccc(C#N)cc1-c1nc2sc(-c3cc(-c4ccc5cccc(O)c5c4O)ccc3O)nc2s1	3.004	-6.58688	3.54502	98.4142	0.216123	1.40277	0.826709	1.70851	2.5	0.372426	0.997702	0.801389	0.775313	0.5	3	3.41523
CCN(CC)c1ccc2oc(-c3cc4cc(-c5cc6ccc(N(CC)CC)cc6o5)oc4cc3O)nc2c1	3.006	-6.99434	4.48618	98.1741	0.388317	1.18148	3.35417	0.57474	2	0.0805972	0.931958	0.805151	0.709717	1	3	6.79873
COc1ccc(OC)c(-c2nc3sc(-c4cc(C=C(C#N)C#N)ccc4O)nc3s2)c1	3.007	-6.13625	3.49079	98.6468	-0.413811	0.825051	4.35043	0.912	2	0.10965	0.99907	0.88307	0.845716	1	3	-3.10232
CCN(CC)c1ccc2cc(-c3oc4ccc(-c5ccc(C=C(C#N)C#N)cc5)cc4c(=O)c3O)oc2c1	3.008	-6.09899	3.52997	98.9594	-0.406021	0.526773	4.02821	0.763204	2	0.115597	0.985633	0.921268	0.891868	1	3	6.28372
CCCCN(CCCC)c1nc2ccc(-c3cc4cc(-c5nc6cc(C(F)(F)F)ccc6o5)c(O)cc4o3)cc2s1	3.008	-8.08544	4.74785	100.362	0.977926	0.104392	3.35482	0.843269	2	0.878444	0.977896	0.149787	0.892806	1	3	3.39349
CC1(C)C(c2ccc(-c3ccc4c(c3)C(=O)c3cccc(O)c3C4=O)cc2C(F)(F)F)=Nc2ccc3ccccc3c21	3.02	-9.19729	4.37272	98.6077	1.144	0.502527	2.46659	0.972526	2	0.538292	0.997276	0.954311	0.329259	1	3	0.432264
CCCCN(CCCC)c1ccc2oc(C=C(C#N)C#N)c(O)c(=O)c2c1	3.034	-5.70377	3.7126	98.7814	-0.401535	0.608091	4.14608	0.846889	2	0.351082	0.59318	0.710721	0.97401	1	3	-0.265182
CCN(CC)c1ccc(-c2ccc(-c3nc4ccc(-c5nc6sc(C(C)(C)C)nc6s5)cc4o3)c(O)c2)cc1	3.042	-8.61678	3.83051	99.34	0.241803	0.438587	3.48675	0.493951	2	0.176256	0.99966	0.786576	0.721145	1	3	7.92877
CCCCN(CCCC)c1ccc2cc(-c3cc4cc(-c5nc6cc(C(C)(C)C)ccc6o5)c(O)cc4o3)oc2c1	3.043	-10.0367	6.17587	99.1753	0.546154	0.426846	3.73473	0.647981	2	0.7253	0.822188	0.189261	0.711399	1	3	7.56822
CCCCN(CCCC)c1ccc(-c2cc3cc(-c4nc5cc(C(F)(F)F)ccc5o4)c(O)cc3o2)s1	3.056	-7.67312	4.37344	99.7087	0.891451	0.190567	4.35092	0.699631	2	0.789834	0.961953	0.123921	0.740515	1	3	6.02969
CCN(CC)c1ccc(-c2ccc3c(c2)C(=O)c2cc(-c4ccc(-c5ccc(C=C(C#N)C#N)cc5)cc4O)cc(O)c2C3=O)cc1	3.057	-9.59199	4.35678	98.8368	-0.186848	0.522158	2.73737	0.845907	2	0.489955	0.999879	0.99544	0.471765	1	3	5.10678
CCN(CC)c1ccc2cc(-c3ccc4c(c3)C(=O)c3cc(-c5ccc(C=C(C#N)C#N)cc5)cc(O)c3C4=O)oc2c1	3.061	-8.97196	4.29267	99.1796	0.0132753	0.471285	2.94548	0.896365	2	0.127651	0.999686	0.988829	0.958949	1	3	7.38398
CCCCN(CCCC)c1ccc2cc(-c3cc4cc(-c5nc6cc(-c7cccc(O)c7)ccc6o5)c(O)cc4o3)oc2c1	3.062	-8.33526	5.00254	98.6014	0.409365	0.736207	1.80922	0.992735	2	0.810352	0.856959	0.493869	0.6356	1	3	8.72719
CCN(CC)c1ccc(-c2nc3sc(-c4cc(C=C(C#N)C#N)ccc4O)nc3s2)cc1	3.063	-6.91079	3.20567	99.2335	-0.322988	0.476816	4.33763	0.765763	2	0.0480206	0.998569	0.923479	0.94926	1	3	-0.622545
CN(C)N(c1ccc(-c2ccc3c(c2)C(=O)c2cc(-c4ccc(C(F)(F)F)cc4)cc(O)c2C3=O)cc1)c1nc2ccccc2o1	3.064	-7.32444	3.57682	97.7232	0.893761	1.88239	4.52239	0.790994	2	0.727848	0.999477	0.878185	0.0134358	1	3	3.56282
CCN(CC)c1ccc(-c2ccc(-c3nc4ccc(-c5nc6sc(-c7cc(C)ccc7O)nc6s5)cc4o3)c(O)c2)cc1	3.07	-8.32701	3.48842	98.7908	0.393755	0.731754	2.42176	0.854606	2	0.1316	0.999451	0.814071	0.70555	1	3	6.85366
CCN(CC)c1ccc(-c2cc(O)c3c(c2)C(=O)c2cc(-c4nc5ccc(C=C(C#N)C#N)cc5o4)ccc2C3=O)cc1	3.074	-8.68279	4.2776	99.0149	-0.147277	0.586691	2.6628	0.955636	2	0.118325	0.999821	0.988039	0.851979	1	3	6.69049
CCN(CC)c1ccc(-c2ccc3c(c2)C(=O)c2cc(-c4nc5ccc(C=C(C#N)C#N)cc5o4)cc(O)c2C3=O)cc1	3.075	-8.66555	4.30434	98.9764	-0.157433	0.602076	3.27891	0.789473	2	0.153889	0.999872	0.990298	0.718123	1	3	7.58797
CCCCN(CCCC)c1nc2ccc(-c3cc4cc(-c5nc6cc(C(F)(F)F)ccc6o5)c(O)cc4o3)cc2[nH]1	3.082	-6.69999	4.57582	100.128	1.04527	0.130913	3.57075	0.885075	2	0.873988	0.927277	0.114008	0.821855	1	3	5.0907
CCCCN(CCCC)c1ccc(-c2cc3cc(-c4nc5cc(C=C(C#N)C#N)ccc5o4)c(O)cc3o2)cc1	3.083	-7.82343	4.16438	99.1977	-0.258148	0.374936	3.29833	0.848223	2	0.430961	0.980748	0.673171	0.928579	1	3	2.18297
CCN(CC)c1ccc(N(CC)CC)c(-c2nc3sc(-c4cc(C(F)(F)F)ccc4O)nc3s2)c1	3.092	-6.93015	3.66883	99.1453	0.401804	0.501054	5.01606	0.652891	1.5	0.10788	0.967633	0.544098	0.778441	1.5	3	-0.376232
CC1=NC(=C(c2nc3ccccc3s2)c2cc(Cl)ccc2NC=O)C(=O)N1C	3.098	-4.92481	3.00565	98.066	-0.200147	1.25643	4.44315	0.611763	2	0.184435	0.994491	0.871579	0.755886	1	3	-0.571183
CCCCN(CCCC)c1ccc2cc(-c3cc4cc(-c5nc6cc(N(CC)CC)ccc6o5)c(O)cc4o3)oc2c1	3.103	-8.94533	5.53961	98.6005	0.517575	0.722306	3.0111	0.598382	2	0.569441	0.817258	0.601246	0.828641	1	3	13.2746
CC1(C)C(CNc2ccc[nH]2)=Nc2ccc3ccccc3c21	3.107	-4.93788	3.4423	98.5563	0.111148	0.878633	6.77464	0.308662	1.5	0.247526	0.881239	0.701344	0.418036	1.5	3	-10.0666
COc1ccc(C=C(C#N)C#N)cc1-c1nc2sc(-c3cc([N+](=O)[O-])ccc3O)nc2s1	3.107	-5.90189	3.45374	98.8662	-0.334942	0.674812	4.17543	0.92289	2	0.0549728	0.99989	0.969093	0.996131	1	3	3.79031
CCN(CC)c1ccc(N)c(-c2nc3sc(-c4nc5ccc(-c6nc7ccccc7o6)cc5o4)nc3s2)c1	3.113	-7.12635	4.55157	97.4826	0.592856	1.87401	2.76299	0.871481	2	0.0693033	0.999072	0.897527	0.943145	1	3	9.23641
CCN(CC)c1ccc(-c2ccc(-c3nc4ccc(-c5nc6sc([N+](=O)[O-])nc6s5)cc4o3)c(O)c2)cc1	3.14	-6.83001	3.02224	98.9631	0.00551511	0.656632	3.16977	0.725321	2	0.0641952	0.999995	0.990943	0.988697	1	3	8.1865
CCCCN(CCCC)c1ccc(-c2cc3cc(-c4nc5cc(-c6ccc(-c7nc8ccccc8o7)c(O)c6)ccc5o4)c(O)cc3o2)cc1	3.14	-9.45668	4.94156	99.1166	0.548092	0.404053	1.29304	0.928623	2	0.806392	0.988896	0.401182	0.439997	1	3	4.82969
CCCCN(CCCC)c1ccc(-c2cc3cc(-c4nc5cc(-c6ccc(-c7nc8ccccc8s7)c(O)c6)ccc5o4)c(O)cc3o2)cc1	3.14	-9.71184	4.53059	99.506	0.686945	0.336181	1.2369	0.926562	2	0.845689	0.992805	0.578673	0.345652	1	3	4.05819
CC(C)(C)c1ccc(O)c(-c2nc3sc(-c4ccc(-c5cc(C#N)ccc5-c5cccc6c5C(=O)c5ccccc5C6=O)cc4)nc3s2)c1	3.141	-9.25039	3.88078	99.8057	0.860512	0.360113	2.10222	1.32482	2.5	0.866881	0.999902	0.824274	0.517818	0.5	3	-2.11666
COc1ccc(C2=Nc3ccc4ccccc4c3C2(C)C)c(-c2nc3sc(-c4cc(-c5ccccc5)ccc4O)nc3s2)c1	3.167	-9.13803	4.56621	99.1834	0.726389	0.452966	3.64695	0.79764	2	0.613033	0.999729	0.893893	0.516185	1	3	-4.59816
O=CNc1ccc2nc([C@@H](c3ccccc3)c3ccc4cccc(O)c4c3O)oc2c1	3.172	-4.56523	3.40504	97.3367	0.243004	3.00936	1.36684	0.93321	2	0.176839	0.990958	0.700904	0.775655	1	3	-3.56755
N#CC(C#N)=Cc1ccc(-c2ccc(-c3nc4ccc(-c5nc6scnc6s5)cc4o3)c(O)c2)cc1	3.172	-7.77226	4.09978	99.5598	-0.0947009	0.385418	3.07871	0.820071	2	0.14845	0.999885	0.884819	0.95641	1	3	-2.42308
CCN(CC)c1cc2n(c1-c1oc3ccccc3c(=O)c1O)CC=C2	3.202	-4.65522	3.16903	98.1838	-0.220067	2.04193	6.86972	0.359209	1.5	0.226317	0.851849	0.81002	0.660916	1.5	3	0.399703
CCN(CC)c1cc2n(c1-c1ccc3c(c1)C(=O)c1cc(-c4ccc(-c5ccc(N)cc5)cc4)cc(O)c1C3=O)CC=C2	3.211	-8.59776	4.18149	97.8776	0.98652	1.93904	4.12137	0.494504	2	0.804093	0.999721	0.998487	0.0781355	1	3	7.31125
CCN(CC)c1ccc2cc(-c3cc4cc(-c5nc6cc(C=C(C#N)C#N)ccc6o5)c(O)cc4o3)oc2c1	3.233	-6.42018	3.51603	99.0435	-0.381046	0.516907	3.19813	0.847912	2	0.0573246	0.992189	0.877858	0.878653	1	3	1.9265
N#CC(C#N)=Cc1ccc(-c2ccc(-c3nc4ccc(-c5nc6sc(N(c7ccccc7)c7ccccc7)nc6s5)cc4o3)c(O)c2)cc1	3.298	-10.9047	5.15215	99.9186	0.00969163	0.208608	2.05814	0.805244	2	0.213627	0.999951	0.714183	0.981953	1	3	0.831554
CC1(C)C(c2ccc(C#N)cc2-c2nc3sc(-c4cc(-c5ccccc5O)ccc4O)nc3s2)=Nc2ccc3ccccc3c21	3.364	-8.60381	4.10098	99.209	0.493565	0.590267	2.08966	1.29617	2.5	0.607644	0.997773	0.820038	0.879689	0.5	3	-0.81884
CC(C)(C)c1ccc(O)c(-c2nc3sc(-c4cc(C(C)(C)C)ccc4C4=Nc5ccc6ccccc6c5C4(C)C)nc3s2)c1	3.375	-10.611	4.78506	99.2899	0.574741	0.41115	4.20446	0.88032	2	0.383833	0.996742	0.302645	0.757739	1	3	-3.06199
CC(C)(C)c1ccc(O)c(-c2nc3sc(-c4ccc5nc(-c6cc(C#N)ccc6-c6cccc7c6C(=O)c6ccccc6C7=O)oc5c4)nc3s2)c1	3.383	-9.49652	4.02042	99.5022	0.722768	0.515821	1.35243	1.39334	2.5	0.706711	0.999906	0.680106	0.898792	0.5	3	-0.110802
CC(C)(C)c1ccc(O)c(-c2nc3sc(-c4ccc5nc(-c6cc(C#N)ccc6-c6cccc7ccc8cccnc8c67)oc5c4)nc3s2)c1	3.384	-9.8648	3.80821	99.2121	0.405102	0.597911	1.65913	1.34091	2.5	0.745922	0.999914	0.681487	0.754657	0.5	3	-1.6685
CC(C)(C)c1ccc(O)c(-c2nc3sc(-c4cc(-c5ccc[nH]5)ccc4C4=Nc5ccc6ccccc6c5C4(C)C)nc3s2)c1	3.496	-8.89933	4.1155	99.1494	0.614811	0.530924	3.55494	0.832503	2	0.505894	0.999512	0.769255	0.336274	1	3	-1.71934
CC1(C)C(c2ccc(-c3ccc[nH]3)cc2-c2nc3sc(-c4cc(-c5ccccc5O)ccc4O)nc3s2)=Nc2ccc3ccccc3c21	3.5	-8.95531	4.09609	98.8649	0.572457	0.602754	1.90974	0.983207	2	0.499923	0.999538	0.918518	0.322384	1	3	-2.46106
CCN(CC)c1cc2n(c1-c1nc3ccc(-c4nc5sc(-c6cc(C)ccc6O)nc5s4)cc3o1)CC=C2	3.587	-6.96835	3.72038	98.4858	0.383157	1.09066	3.70594	0.782105	2	0.148914	0.998159	0.870992	0.910041	1	3	0.337231
O=C(Nc1ccc(Cl)cc1-c1ccccn1)c1ccccc1	1.696	-4.95808	3.36216	98.7297	-0.570563	0.507838	2.79438	0.82785	2	0.776033	0.982235	0.536986	0.756666	0.5	2.5	-10.2319
O=C(Nc1ccc(Cl)cc1)c1nc2ccccc2s1	1.729	-4.84806	3.42271	99.0912	-0.445419	0.488954	3.78151	0.650423	2	0.375053	0.979332	0.721529	0.893419	0.5	2.5	-7.65282
COc1ccc(NC(=O)c2nc3ccccc3o2)cc1	1.804	-4.12867	3.3372	96.3956	-0.113804	2.90552	5.21236	0.509952	1.5	0.396824	0.954025	0.765362	0.328851	1	2.5	-1.50248
O=C(Nc1cccc2ccc3cccnc3c12)c1ccccc1	1.834	-4.78849	3.41788	98.2739	-0.185861	1.34758	3.29342	0.72053	2	0.616345	0.996759	0.856992	0.879159	0.5	2.5	-12.0027
O=C(Nc1ccc(Cl)cc1-c1nc2ccccc2[nH]1)c1ccccc1	1.847	-5.54924	4.00167	98.8402	-0.368638	0.464142	2.56243	0.800009	2	0.80857	0.991053	0.599101	0.749004	0.5	2.5	-7.74384
COc1cc(Cl)ccc1NC(=O)c1nc2ccccc2s1	1.894	-5.02949	3.58965	98.9283	-0.0817393	0.71226	4.33928	0.601165	2	0.344906	0.980334	0.724194	0.7962	0.5	2.5	-8.31797
O=C1c2ccccc2C(=O)c2c(O)cc(-c3ccccc3)cc21	1.905	-6.81819	3.97142	97.5039	0.351447	1.6921	5.43319	0.802783	1.5	0.216192	0.967984	0.889528	0.763512	1	2.5	0.148047
N#Cc1ccc(NC(=O)c2nc3ccccc3s2)cc1	1.912	-4.42007	2.97278	97.9518	0.235136	2.05488	2.91512	0.972097	2	0.587209	0.985013	0.816823	0.830045	0.5	2.5	-9.87813
O=C(Nc1ccccc1-c1cn2ccccc2n1)c1ccccc1	1.915	-3.66856	2.77315	97.9724	-0.0799717	1.79232	3.03339	0.967282	2	0.66589	0.982373	0.705792	0.82217	0.5	2.5	-9.21797
CC(C)(C)C(=O)Nc1ccc(Cl)cc1-c1ccccn1	2.01	-4.04746	3.26674	96.7637	0.0326545	2.3081	6.82341	0.423034	1.5	0.354533	0.870906	0.415938	0.707953	1	2.5	-6.52731
O=C(Nc1ccc(Cl)cc1-c1cn2ccccc2n1)c1ccccc1	2.027	-5.10624	3.57912	99.0279	-0.510095	0.48305	2.88038	0.897731	2	0.789275	0.991699	0.613419	0.778636	0.5	2.5	-8.31365
Oc1ccccc1-c1nc2ccc(-c3ccc(Nc4ccccc4)cc3)cc2s1	2.043	-6.90399	3.35101	99.1615	0.241944	0.418196	3.70438	0.540673	2	0.713381	0.993186	0.751944	0.554089	0.5	2.5	-5.24939
CC(C)(C)c1ccc(C(=O)Nc2cccc3ccc4cccnc4c23)cc1	2.044	-6.10257	4.23745	98.8026	0.0550327	0.742786	5.04244	0.508586	1.5	0.691093	0.994658	0.72356	0.689808	1	2.5	-12.3927
N#Cc1cc(Cl)ccc1NC(=O)c1nc2ccccc2s1	2.101	-4.89581	3.15314	98.9606	0.152177	0.864224	3.3387	0.790211	2	0.433883	0.980801	0.702938	0.909152	0.5	2.5	-5.75088
O=C1c2cc(-c3ccc([N+](=O)[O-])cc3)ccc2C(=O)c2c(O)cccc21	2.104	-7.13282	3.53217	97.2582	0.386045	2.77576	3.17893	0.876794	2	0.327782	0.999153	0.992251	0.836533	0.5	2.5	1.16283
CNc1ccc2c(c1)C(=O)c1cccc(O)c1C2=O	2.11	-5.95886	3.24647	96.1335	0.391136	4.31773	5.02038	0.749338	1.5	0.0961243	0.963629	0.94773	0.788378	1	2.5	1.05073
O=C(Nc1cc(O)c2c(ccc3cc(-c4ccccc4)cnc32)c1)c1ccccc1	2.114	-4.7652	3.76821	98.3602	-0.120154	0.721774	2.82884	0.690151	2	0.883148	0.99733	0.849953	0.541632	0.5	2.5	-7.1297
Cc1cc(C(=O)Nc2cccc3ccc4cccnc4c23)cc(C)c1C	2.126	-5.797	3.83734	97.3481	0.0390006	2.69518	4.60694	0.520039	2	0.555618	0.99524	0.881714	0.827744	0.5	2.5	-11.9885
CNc1cc(O)c2c(c1)C(=O)c1ccccc1C2=O	2.14	-5.92066	3.28135	96.7015	0.539808	3.60185	6.29431	0.768152	1.5	0.11499	0.963913	0.903594	0.881236	1	2.5	-0.0158163
O=C1c2ccccc2C(=O)c2c(O)cc(-c3ccc(-c4ccc([N+](=O)[O-])cc4)cc3)cc21	2.188	-8.6738	4.04531	97.3812	0.498838	2.36766	3.35444	0.755264	2	0.585742	0.99978	0.990862	0.744708	0.5	2.5	1.56155
Cc1cc(-c2ccc3nc(-c4ccccc4O)sc3c2)cc(C)c1C	2.21	-6.35573	3.66469	98.9224	0.301926	0.723461	5.92879	0.424122	1.5	0.31226	0.929204	0.711264	0.343987	1	2.5	-11.7331
ClCCNc1cccc2ccc3cccnc3c12	2.214	-4.17072	3.34853	98.2242	-0.14197	1.78776	5.32523	0.858139	1.5	0.15897	0.963332	0.992107	0.848795	1	2.5	-8.42047
CCN(CC)c1ccc(-c2ccc(-c3nc4ccccc4[nH]3)c(O)c2)cc1	2.219	-4.94891	3.27092	98.2611	0.147306	1.18694	5.71853	0.362584	1.5	0.405281	0.916998	0.902398	0.325202	1	2.5	4.1421
Cc1cc(-c2cc(O)c3c(c2)C(=O)c2ccccc2C3=O)cc(C)c1C	2.223	-7.44315	3.84235	98.3268	0.725788	1.43819	5.51481	0.687617	1.5	0.255681	0.980819	0.901727	0.739662	1	2.5	3.34106
Cc1cc(-c2ccc3nc(-c4ccccc4O)[nH]c3c2)cc(C)c1C	2.23	-5.30593	3.60831	98.6751	0.37105	0.891552	7.04024	0.485551	1.5	0.436808	0.909501	0.801236	0.308437	1	2.5	-5.33994
O=C(Nc1ccc2c(c1)C(=O)c1cc(-c3ccccc3O)cc(O)c1C2=O)c1ccccc1	2.237	-8.38506	4.26834	97.6989	-0.227987	1.39113	1.82828	0.931148	2	0.493288	0.998722	0.951724	0.771734	0.5	2.5	3.13676
CCN(CC)c1ccc(-c2cc(O)c3c(ccc4cccnc43)c2)cc1	2.267	-4.78903	3.65912	97.9723	-0.0466803	1.37783	6.14152	0.360992	1.5	0.317965	0.968029	0.929307	0.518476	1	2.5	-3.60483
Cc1cc(NCc2ccc3c(c2)C(=O)c2cccc(O)c2C3=O)cc(C)c1C	2.289	-7.86359	3.94312	98.546	0.669891	1.14591	4.29598	0.538974	2	0.355243	0.985654	0.922463	0.807425	0.5	2.5	-2.95546
COc1ccc(-c2cc(O)c3c(c2)C(=O)c2ccccc2C3=O)cc1C(F)(F)F	2.29	-6.65508	3.72866	98.3645	0.82966	0.904772	5.03753	0.992547	1.5	0.303646	0.975194	0.774627	0.378182	1	2.5	3.49461
CN(C)c1ccc(-c2oc3cc(-c4ccc([N+](=O)[O-])cc4)ccc3c(=O)c2O)cc1	2.31	-5.24779	2.79503	98.6149	-0.21377	0.817096	5.34648	0.677131	1.5	0.30312	0.997979	0.967224	0.683067	1	2.5	3.07004
CCN(CC)c1ccc(-c2ccc3nc(-c4ccc(-c5ccccc5)cc4O)[nH]c3c2)cc1	2.318	-5.46538	3.42037	98.415	0.414632	0.749958	5.22393	0.395725	1.5	0.706366	0.978833	0.914718	0.0686876	1	2.5	8.06714
c1ccc(-c2n[nH]c3c2CCc2cccnc2-3)cc1	2.319	-3.6287	3.28492	98.0623	0.208598	1.59012	6.50223	0.948377	1.5	0.326836	0.703922	0.734509	0.647879	1	2.5	-10.3566
CNc1ccc(-c2ccc(-c3nc4ccc([N+](=O)[O-])cc4o3)c(O)c2)cc1	2.322	-5.72759	3.5942	98.3241	-0.165651	1.33159	4.94577	0.653772	2	0.344335	0.997876	0.931687	0.8132	0.5	2.5	4.8823
O=C(Nc1ccc(Cl)cc1[N+](=O)[O-])c1ccc2cc3ccccc3c(O)c2c1O	2.324	-5.76305	3.39205	99.5632	-0.593696	0.207186	1.06099	0.95203	2	0.334742	0.997188	0.86484	0.959871	0.5	2.5	-1.50924
CCCCN(CCCC)c1ccc(-c2ccc(-c3nc4ccccc4s3)c(O)c2)cc1	2.331	-6.87099	4.54531	99.0751	0.408747	0.4547	5.15322	0.250238	1.5	0.846304	0.82392	0.642155	0.388	1	2.5	3.52526
CCN(CC)c1ccc(-c2ccc3nc(-c4nc5ccccc5[nH]4)sc3c2)cc1	2.342	-5.85413	3.50761	98.8136	0.254237	0.753689	5.49615	0.33656	1.5	0.43981	0.970186	0.912184	0.328617	1	2.5	-5.30151
CCCCN(CCCC)c1ccc(-c2ccc3c(c2)C(=O)c2cccc(O)c2C3=O)cc1	2.345	-8.67915	4.89865	98.8833	0.929287	0.683113	3.73168	0.458393	2	0.779418	0.948426	0.924376	0.500726	0.5	2.5	6.75879
O=C(Nc1ccc2c(c1)C(=O)c1cc(-c3nc4ccccc4[nH]3)cc(O)c1C2=O)c1ccccc1	2.351	-8.49047	4.21134	97.9384	0.0755345	1.2685	1.43118	0.938575	2	0.679379	0.999809	0.97859	0.840724	0.5	2.5	1.39765
O=C(Nc1cc(O)c2c(ccc3cccnc32)c1)C(F)(F)F	2.375	-3.60586	2.68328	96.9928	0.273913	2.1526	5.17355	0.727761	1.5	0.133638	0.842419	0.838397	0.913517	1	2.5	-8.20647
O=C1c2cc(-c3ccc(N(c4ccccc4)c4ccccc4)cc3)ccc2C(=O)c2c(O)cc(-c3ccccc3)cc21	2.387	-11.5849	6.01665	99.0951	1.08467	0.288377	2.39028	0.649952	2	0.585356	0.998849	0.885981	0.794609	0.5	2.5	3.97207
CNc1ccc(C#N)cc1-c1nc2ccc(-c3ccc(C(C)(C)C)cc3)cc2o1	2.399	-7.2385	3.67159	98.5964	0.489357	0.735195	6.14414	0.796865	1.5	0.76799	0.923404	0.318673	0.300948	1	2.5	-4.3022
CCN(CC)c1ccc(-c2oc3cc(-c4ccc([N+](=O)[O-])cc4)ccc3c(=O)c2O)cc1	2.401	-5.47356	3.69575	98.398	-0.256683	0.956223	5.05171	0.545087	1.5	0.28372	0.99781	0.968924	0.733173	1	2.5	2.60642
CCN(CC)c1ccc(-c2ccc(-c3nc4ccc([N+](=O)[O-])cc4o3)c(O)c2)cc1	2.417	-6.2165	3.44614	98.3059	-0.0800327	1.14161	5.13112	0.487226	1.5	0.263462	0.995785	0.937619	0.822714	1	2.5	12.7269
CCN(CC)c1ccc(-c2cc(O)c3c(c2)C(=O)c2cc(C#N)ccc2C3=O)cc1	2.45	-7.75788	4.04926	98.0406	0.633951	1.54074	5.74554	0.64871	1.5	0.529455	0.993735	0.969396	0.528148	1	2.5	3.64183
COc1ccc(C#N)cc1-c1ccc(-c2nc3ccc([N+](=O)[O-])cc3o2)c(O)c1	2.46	-5.69574	3.45742	98.179	0.0633185	1.79083	5.07891	1.03476	2	0.665829	0.99601	0.873743	0.81703	0.5	2.5	3.61335
O=C1c2cc(-c3ccc(Nc4ccc(N(c5ccccc5)c5ccccc5)cc4)cc3)ccc2C(=O)c2c(O)cccc21	2.472	-10.2166	5.08213	98.3813	1.04859	0.789907	0.964702	0.802352	2	0.591136	0.999667	0.922787	0.768581	0.5	2.5	2.14402
Cc1cc(-c2ccc3c(c2)C(=O)c2cc(N(C)C)cc(O)c2C3=O)cc(C)c1C	2.48	-7.84904	3.65983	98.4494	0.824131	1.23865	6.90549	0.686057	1.5	0.334423	0.995567	0.963756	0.412535	1	2.5	7.22325
N#CC(=Cc1nc2ccccc2s1)NC(=O)c1ccc(Cl)cc1	2.493	-5.40812	3.65994	99.1971	-0.0390018	0.56073	1.69558	0.970206	2	0.674897	0.998064	0.743164	0.977787	0.5	2.5	-8.12466
COc1ccc(OC)c(-c2nc3sc(-c4cc(-c5ccccc5)ccc4O)nc3s2)c1	2.498	-6.49486	3.63966	98.5191	0.406633	1.0405	5.96728	0.804824	1.5	0.412823	0.99639	0.724641	0.315502	1	2.5	-5.29289
O=C(Nc1cc(O)c2c(ccc3cc(-c4cn5ccccc5n4)cnc32)c1)c1ccccc1	2.503	-4.57227	3.54217	97.9772	-0.0900944	1.53135	2.15042	0.912685	2	0.850806	0.998803	0.920535	0.525882	0.5	2.5	-6.26615
CNc1ccc(-c2nc3ccccc3o2)cc1-c1nc2ccc(-c3ccc([N+](=O)[O-])cc3)cc2o1	2.509	-8.5579	4.94689	97.6688	0.322152	2.28945	2.86307	0.803118	2	0.441595	0.999532	0.911655	0.785357	0.5	2.5	0.689336
COc1ccc(C#N)cc1-c1ccc(-c2nc3ccc(-c4ccc([N+](=O)[O-])cc4)cc3o2)c(O)c1	2.513	-6.85591	3.90872	98.3855	0.147482	1.28175	4.40449	0.873514	2	0.876817	0.999051	0.924255	0.539304	0.5	2.5	1.78307
CN(C)c1cc(O)c2c(c1)C(=O)c1cc(-c3ccc(N(c4ccccc4)c4ccccc4)cc3)ccc1C2=O	2.517	-9.88171	4.97356	99.2922	1.09655	0.383057	3.51557	0.630214	2	0.332613	0.997727	0.908182	0.892438	0.5	2.5	7.31489
CCN(CC)c1ccc(-c2cc(O)c3c(ccc4cc(C#N)cnc43)c2)cc1	2.519	-5.78505	3.61458	97.5509	0.121248	2.2126	5.69562	0.521549	1.5	0.673956	0.975557	0.915933	0.430337	1	2.5	-4.11661
N#CC(C#N)=Cc1ccc(-c2ccc(-c3nc4ccccc4[nH]3)c(O)c2)cc1	2.524	-5.98253	3.63722	98.4207	-0.379835	0.945332	3.52945	0.833154	2	0.314685	0.981513	0.932209	0.905923	0.5	2.5	-2.63199
CCCCN(CCCC)c1ccc2oc(-c3ccc(-c4ccc(N(C)C)cc4)cc3)c(O)c(=O)c2c1	2.527	-5.7643	4.47464	98.5654	0.0837046	0.605624	5.27632	0.435023	1.5	0.772911	0.889628	0.704258	0.296874	1	2.5	3.45484
CN(C)N(c1ccccc1)c1ccc(-c2cc(O)c3c(c2)C(=O)c2ccccc2C3=O)cc1	2.543	-5.77184	3.52605	98.0165	0.524626	1.51748	4.61823	0.64337	2	0.373953	0.945457	0.933497	0.886766	0.5	2.5	4.20639
Cc1ccc2c(c1)C(=O)c1cc(NN(C)C)cc(O)c1C2=O	2.547	-5.26447	3.10327	96.8098	0.652327	3.12133	6.59689	0.934321	1.5	0.204437	0.924413	0.937758	0.967057	1	2.5	3.9041
N#CC(C#N)=Cc1ccc(-c2ccc(-c3cc(O)c4c(c3)C(=O)c3ccccc3C4=O)cc2)cc1	2.548	-8.67379	4.09776	98.6231	-0.174335	0.727115	2.81161	0.964205	2	0.345443	0.999053	0.977786	0.845203	0.5	2.5	2.54545
CCN(CC)c1ccc(-c2nc3sc(-c4ccccc4O)nc3s2)cc1	2.553	-5.83129	3.23	98.5835	0.0750679	0.891843	5.28851	0.541564	1.5	0.0500472	0.989549	0.805589	0.870856	1	2.5	3.33802
CN(C)c1ccc(-c2ccc(-c3ccc4c(c3)C(=O)c3cc(-c5ccc(C(F)(F)F)cc5)cc(O)c3C4=O)cc2)cc1	2.554	-10.4986	4.56983	98.6821	1.2236	0.436983	5.17288	0.667669	1.5	0.87122	0.999426	0.944864	0.00375549	1	2.5	1.49693
COc1ccc(C(C)(C)C)cc1-c1ccc2c(c1)C(=O)c1cc(-c3ccc([N+](=O)[O-])cc3)cc(O)c1C2=O	2.556	-8.75197	3.86743	98.8211	0.497879	0.757297	4.85553	0.646724	2	0.722901	0.999881	0.981313	0.422549	0.5	2.5	3.29004
CCN(CC)c1cc(O)c2c(c1)C(=O)c1cc(-c3cc(C)c(C)c(C)c3)ccc1C2=O	2.559	-8.63594	4.42052	98.5768	0.858733	1.0865	5.56685	0.428114	1.5	0.336455	0.993933	0.974783	0.479041	1	2.5	6.24794
Cc1cc(-c2cc(O)c3c(ccc4cc(N(C)C)cnc43)c2)cc(C)c1C	2.562	-5.21856	3.52758	97.2981	0.367945	2.44427	7.45478	0.590701	1.5	0.495547	0.974445	0.859726	0.311441	1	2.5	-4.86626
CCN(CC)c1ccc(-c2ccc3nc(-c4nc5ccc(-c6ccc(N(CC)CC)cc6)cc5[nH]4)[nH]c3c2)cc1	2.563	-6.39286	3.6296	97.9229	0.463221	1.2383	5.75188	0.252926	1.5	0.830678	0.995884	0.971085	0.0191548	1	2.5	-4.6327
CCN(CC)c1ccc2cc(-c3cc(O)c4c(ccc5cccnc54)c3)oc2c1	2.568	-5.4216	3.26129	98.1241	0.148016	1.2659	5.31122	0.472056	1.5	0.150953	0.970766	0.89447	0.836148	1	2.5	-0.060905
O=C(Nc1cc(O)c2c(ccc3cc(-c4oc5ccccc5c(=O)c4O)cnc32)c1)c1ccccc1	2.571	-4.66388	3.09324	98.3683	-0.37754	0.692523	1.74416	0.986794	2	0.700555	0.99877	0.856287	0.646302	0.5	2.5	-4.74871
N#CC(C#N)=Cc1ccc(-c2ccc(-c3nc4ccc(-c5ccccc5)cc4o3)c(O)c2)cc1	2.572	-7.82321	4.38002	98.8842	-0.333588	0.502151	3.45497	0.756518	2	0.350239	0.992128	0.816316	0.79436	0.5	2.5	-1.83402
O=C(Nc1cc2cc(O)c(O)cc2o1)c1nc2ccccc2s1	2.576	-4.18658	2.91797	98.138	-0.193176	1.26373	6.06438	0.750891	1.5	0.185755	0.993283	0.770374	0.818665	1	2.5	-5.04927
Oc1ccc(-c2ccc(-c3cc4c5c(c3)CCCN5CCC4)cc2)cc1-c1ncco1	2.584	-6.61623	3.68657	97.5463	0.275346	2.50004	5.91346	0.484196	1.5	0.811327	0.978338	0.825493	0.0650592	1	2.5	1.53702
O=C1c2cc(-c3ccc(N(c4ccccc4)[N+](=O)[O-])cc3)ccc2C(=O)c2c(O)cccc21	2.589	-7.2428	3.95282	98.219	0.0913316	0.868151	1.61089	0.877428	2	0.349173	0.999717	0.998533	0.945367	0.5	2.5	5.24428
CCCCN(CCCC)c1ccc(-c2oc3ccc(-c4cc(C)c(C)c(C)c4)cc3c(=O)c2O)cc1	2.6	-6.4691	5.06808	98.6639	0.228854	0.631875	5.30324	0.486215	1.5	0.795866	0.877271	0.530156	0.483996	1	2.5	3.35255
CCN(CC)c1ccc(-c2ccc3c(c2)C(=O)c2cc(N(c4ccccc4)c4ccccc4)cc(O)c2C3=O)cc1	2.603	-10.1218	5.03513	99.1452	1.11812	0.398825	3.42724	0.521821	2	0.313904	0.997459	0.926806	0.739475	0.5	2.5	4.43949
CCCCN(CCCC)c1ccc2c(c1)C(=O)c1cc(-c3ccc(C(F)(F)F)cc3)cc(O)c1C2=O	2.604	-8.91116	4.68667	99.4726	1.08995	0.249171	4.91955	0.472074	2	0.866732	0.964175	0.739934	0.327862	0.5	2.5	4.3095
CCN(CC)c1ccc(-c2oc3ccccc3c(=O)c2O)s1	2.605	-4.86995	3.24308	98.6854	-0.210916	1.08082	6.42	0.502651	1.5	0.13368	0.965504	0.728247	0.712322	1	2.5	2.70875
CCCCN(CCCC)c1ccc(-c2oc3ccc(-c4ccc(N(CC)CC)cc4)cc3c(=O)c2O)cc1	2.611	-6.61357	5.16398	98.5299	0.109718	0.629072	4.79998	0.388755	2	0.718045	0.873477	0.71438	0.356867	0.5	2.5	6.41556
CCN(CC)c1ccc(-c2nc3sc(-c4cc(C)ccc4O)nc3s2)cc1	2.617	-6.03363	3.1465	98.4942	0.124022	1.03176	5.39463	0.609259	1.5	0.0528343	0.990292	0.805685	0.885444	1	2.5	0.75665
CCCCN(CCCC)c1ccc(-c2ccc(-c3nc4cc(-c5ccc([N+](=O)[O-])cc5)ccc4o3)c(O)c2)cc1	2.617	-8.75365	4.44654	98.8548	0.313538	0.43582	4.00759	0.467436	2	0.943981	0.996696	0.895369	0.652019	0.5	2.5	9.3762
N#CC(C#N)=Cc1ccc(-c2ccc3nc(-c4nc5ccccc5s4)[nH]c3c2)cc1	2.617	-7.19194	4.09635	99.1686	-0.339763	0.421614	3.828	0.720967	2	0.35631	0.995292	0.928091	0.871768	0.5	2.5	-11.3053
CCN(CC)c1ccc(-c2nc3sc(-c4ccc(OC)cc4O)nc3s2)cc1	2.62	-5.76952	3.32076	98.2432	0.179848	1.2997	5.39826	0.629183	1.5	0.0885766	0.993738	0.839005	0.727957	1	2.5	6.46512
CCN(CC)c1ccc(-c2nc3sc(-c4ccc(C)cc4O)nc3s2)cc1	2.631	-6.09269	3.10726	98.6335	0.118003	0.879375	5.2289	0.581338	1.5	0.0597173	0.987811	0.786954	0.875098	1	2.5	4.73695
CN(C)N(c1ccccc1)c1ccc(-c2ccc3c(c2)C(=O)c2cc(-c4ccccc4)cc(O)c2C3=O)cc1	2.65	-6.99773	3.97734	98.391	0.638737	0.986254	4.31552	0.637358	2	0.726642	0.993918	0.972481	0.407056	0.5	2.5	4.24197
COc1ccc(OC)c(-c2nc3sc(-c4cc([N+](=O)[O-])ccc4O)nc3s2)c1	2.657	-5.51085	3.40755	98.5679	-0.112351	1.07113	6.12266	0.891372	1.5	0.159669	0.999608	0.93999	0.935477	1	2.5	-3.72354
CCN(CC)c1ccc(-c2ccc3c(c2)C(=O)c2cc(-c4cc([N+](=O)[O-])ccc4O)cc(O)c2C3=O)cc1	2.663	-8.69357	3.92303	98.5291	0.260272	0.825179	5.76034	0.670286	1.5	0.329519	0.999836	0.997097	0.697837	1	2.5	4.36146
COc1ccc(OC)c(-c2nc3sc(-c4ccc(-c5ccc([N+](=O)[O-])cc5)cc4O)nc3s2)c1	2.668	-7.06215	3.63831	98.5429	0.0299506	0.925967	4.78196	0.801877	2	0.496359	0.999942	0.964434	0.746314	0.5	2.5	2.04397
CCCCN(CCCC)c1nc2ccc(-c3ccc(-c4nc5cc(-c6ccccc6)ccc5o4)c(O)c3)cc2s1	2.683	-8.09237	5.06408	100.171	0.815988	0.125274	3.34605	0.489625	2	0.968508	0.988291	0.547182	0.786716	0.5	2.5	1.63654
CN(C)Oc1ccc(-c2ccc3c(c2)C(=O)c2cc(-c4ccc(C(F)(F)F)cc4)cc(O)c2C3=O)cc1	2.685	-7.04859	3.55633	97.9799	1.04119	1.1619	6.32655	0.871052	1.5	0.837175	0.996529	0.850871	0.0775829	1	2.5	2.27007
N#CC(C#N)=Cc1ccc(-c2ccc3nc(-c4nc5ccc(-c6ccccc6)cc5[nH]4)[nH]c3c2)cc1	2.686	-6.85544	3.69419	98.6578	-0.27148	0.591092	3.58689	0.720043	2	0.797873	0.998407	0.95461	0.390725	0.5	2.5	-12.1661
CNc1cccc2c1-c1nc3cccc4c3c(c1C2)CC4	2.7	-6.18416	3.6024	96.5864	0.646663	2.84181	6.89377	0.488449	1.5	0.401788	0.423296	0.929035	0.926024	1	2.5	-5.35766
CCCCN(CCCC)c1ccc(-c2cc(O)c3c(c2)C(=O)c2cc(-c4nc5ccccc5s4)ccc2C3=O)cc1	2.702	-8.39597	4.5199	99.4647	0.813694	0.345471	3.29996	0.44544	2	0.864786	0.997528	0.948829	0.359771	0.5	2.5	3.76241
CCCCN(CCCC)c1ccc(-c2ccc3c(c2)C(=O)c2cc(-c4nc5ccccc5o4)cc(O)c2C3=O)cc1	2.705	-8.41321	5.01362	99.0291	0.87313	0.547874	3.51569	0.468597	2	0.842446	0.996251	0.912226	0.387799	0.5	2.5	7.32738
CCN(CC)c1ccc(-c2ccc3c(c2)C(=O)c2cc(O[N+](=O)[O-])cc(O)c2C3=O)cc1	2.712	-7.94355	4.09722	98.5346	0.332599	0.947336	4.09427	0.581871	2	0.445201	0.999999	0.843746	0.972953	0.5	2.5	5.07797
CCN(CC)c1ccc(-c2nc3sc(-c4cc([N+](=O)[O-])ccc4O)nc3s2)cc1	2.724	-5.94882	2.99266	98.5523	-0.0893908	0.916284	5.50352	0.690494	1.5	0.0723041	0.9994	0.961596	0.980177	1	2.5	0.864321
COc1ccc(C#N)cc1-c1nc2sc(-c3nc4ccccc4[nH]3)nc2s1	2.736	-5.92575	3.58698	97.3352	0.129157	2.55614	4.87677	0.979416	2	0.495492	0.997235	0.747025	0.880798	0.5	2.5	-3.30685
CCN(CC)c1ccc(-c2ccc3c(c2)C(=O)c2cc(-c4ccc(-c5ccc([N+](=O)[O-])cc5)cc4O)cc(O)c2C3=O)cc1	2.769	-9.47406	4.28813	98.5811	0.244943	0.775883	3.52317	0.661508	2	0.725681	0.999972	0.998144	0.329897	0.5	2.5	2.2587
COc1ccc(C#N)cc1-c1nc2sc(-c3cc(-c4ccc([N+](=O)[O-])cc4)ccc3O)nc2s1	2.771	-6.71754	3.62912	98.6002	0.110755	1.15363	4.62746	1.03846	2.5	0.72889	0.999829	0.938637	0.911512	0	2.5	-2.18819
COc1ccc(C(C)(C)C)cc1-c1nc2sc(-c3cc([N+](=O)[O-])ccc3O)nc2s1	2.777	-6.74158	3.33976	98.6973	0.0386105	0.923246	5.8004	0.911129	1.5	0.154029	0.998994	0.772484	0.963987	1	2.5	-3.09535
CCCCN(CCCC)c1ccc(-c2cc3cc(-c4nc5cc([N+](=O)[O-])ccc5o4)c(O)cc3o2)cc1	2.777	-7.24516	4.49453	98.8831	0.277621	0.506925	3.56436	0.692177	2	0.618509	0.994481	0.808833	0.970693	0.5	2.5	3.01177
COc1ccc(C#N)cc1-c1nc2sc(-c3cc([N+](=O)[O-])ccc3O)nc2s1	2.795	-5.25612	3.19306	97.448	-0.112275	2.67323	5.38	1.15681	2	0.318194	0.999268	0.911778	0.981091	0.5	2.5	2.05672
CN(C)N(c1ccccc1)c1ccc(-c2ccc3c(c2)C(=O)c2cc(-c4ccc(C(F)(F)F)cc4)cc(O)c2C3=O)cc1	2.838	-8.03366	3.70199	98.66	1.09611	0.604985	5.1128	0.700125	1.5	0.8334	0.992905	0.899069	0.109943	1	2.5	2.98817
CCN(CC)c1ccc(-c2ccc3c(c2)C(=O)c2cc(-c4cc(C)c(C)c(C)c4)cc(O)c2C3=O)s1	2.853	-8.64399	3.83134	99.253	0.690205	0.471738	5.48479	0.476298	1.5	0.703854	0.999839	0.978239	0.258812	1	2.5	0.511331
CCN(CC)c1ccc(-c2ccccc2)cc1-c1nc2sc(-c3cc([N+](=O)[O-])ccc3O)nc2s1	2.854	-7.69206	3.37704	98.7755	0.386802	0.71068	5.08011	0.624962	1.5	0.234166	0.999608	0.956102	0.962405	1	2.5	3.9031
CCN(CC)c1ccc(-c2ccc3c(c2)C(=O)c2cc(-c4ccc(N(c5ccccc5)c5ccccc5)cc4O)cc(O)c2C3=O)cc1	2.867	-10.3011	4.79912	99.2162	1.07672	0.345279	2.40792	0.630118	2	0.34258	0.998913	0.926182	0.876253	0.5	2.5	2.2544
CCCCN(CCCC)c1ccc2cc(-c3oc4ccc(-c5cc(C)c(C)c(C)c5)cc4c(=O)c3O)oc2c1	2.887	-6.44002	4.92345	98.8213	0.356745	0.564032	5.00773	0.561952	1.5	0.818323	0.826684	0.565541	0.585234	1	2.5	7.93569
CCCCN(CCCC)c1ccc2c(c1)C(=O)c1cc(-c3ccc(C=C(C#N)C#N)cc3)cc(O)c1C2=O	2.898	-10.043	4.89102	99.2253	-0.0412479	0.388632	3.50123	0.736014	2	0.643515	0.995877	0.976459	0.969967	0.5	2.5	8.03278
CCCCN(CCCC)c1ccc2c(c1)C(=O)c1cc(C=C(C#N)C#N)cc(O)c1C2=O	2.899	-8.37316	4.59107	99.26	-0.09812	0.38849	3.51838	0.818403	2	0.392651	0.987651	0.973648	0.98239	0.5	2.5	2.00862
CCCCN(CCCC)c1nc2ccc(-c3cc4cc(-c5nc6cc(-c7ccccc7)ccc6o5)c(O)cc4o3)cc2s1	2.909	-8.7984	5.34898	100.261	0.925396	0.129382	2.62968	0.729115	2	0.91884	0.991809	0.48146	0.915941	0.5	2.5	5.48731
CNc1ccc(C#N)cc1-c1nc2sc(-c3cc(C(C)(C)C)ccc3O)nc2s1	2.931	-6.04535	3.07365	98.4	0.290333	1.25913	5.32042	0.931769	1.5	0.363853	0.990354	0.365631	0.876937	1	2.5	-5.39691
CCN(CC)c1ccc(N)c(-c2nc3sc(-c4cc([N+](=O)[O-])ccc4O)nc3s2)c1	2.939	-5.13523	3.14802	97.2408	0.242823	2.4836	5.40835	0.701143	1.5	0.0480549	0.999382	0.984925	0.993818	1	2.5	-0.630203
CNc1ccc(C=C(C#N)C#N)cc1-c1nc2ccc(-c3ccc(-c4ccc([N+](=O)[O-])cc4)cc3O)cc2o1	2.94	-7.67411	3.91718	98.6552	-0.398424	0.775531	3.01246	0.901235	2	0.387714	0.999873	0.981583	0.932199	0.5	2.5	-0.503505
CCN(CC)c1ccc(-c2ccc3c(c2)C(=O)c2cc(-c4nc5ccc(N(c6ccccc6)c6ccccc6)cc5[nH]4)cc(O)c2C3=O)cc1	2.968	-9.62243	4.51996	99.3365	1.16158	0.282108	1.98572	0.597987	2	0.521755	0.99979	0.958072	0.830042	0.5	2.5	3.3962
CCCCN(CCCC)c1nc2ccc(-c3cc4cc(-c5nc6cc(-c7ccccc7)ccc6o5)c(O)cc4o3)cc2[nH]1	2.978	-7.3206	4.97191	100.021	0.978523	0.13989	2.82871	0.76069	2	0.915723	0.972144	0.404111	0.857865	0.5	2.5	6.10909
CCN(CC)c1ccc(-c2nc3sc(-c4nc5ccc(-c6ccc(N(c7ccccc7)c7ccccc7)cc6)cc5[nH]4)nc3s2)cc1	2.982	-9.23501	3.80589	99.6098	0.830591	0.283037	2.38245	0.75238	2	0.438545	0.999844	0.766716	0.92951	0.5	2.5	0.695945
CNc1ccc(C#N)cc1-c1nc2scnc2s1	2.999	-3.98132	2.44334	92.9293	0.0693056	7.99972	6.55652	0.737747	2	0.324642	0.994942	0.710298	0.889476	0.5	2.5	-6.27976
CCN(CC)c1ccc(C(C)(C)C)cc1-c1nc2sc(-c3cc([N+](=O)[O-])ccc3O)nc2s1	3.017	-7.40809	3.3044	99.1349	0.092562	0.601353	5.98493	0.717815	1.5	0.126772	0.998849	0.830355	0.979953	1	2.5	-2.64554
CCN(CC)c1ccc(C#N)cc1-c1nc2sc(-c3cc(C(C)(C)C)ccc3O)nc2s1	3.038	-7.12385	3.36938	98.8418	0.411082	0.881951	5.39977	0.846235	1.5	0.351884	0.975855	0.421041	0.879678	1	2.5	-3.03088
CCN(CC)c1ccc(C#N)cc1-c1nc2sc(-c3cc(C#N)ccc3O)nc2s1	3.059	-5.58898	3.15874	96.386	0.051078	3.98154	5.88131	0.956748	1.5	0.568752	0.989377	0.678894	0.922321	1	2.5	-2.79152
COc1ccc(-c2ccc[nH]2)cc1-c1nc2sc(-c3cc(-c4cc([N+](=O)[O-])ccc4O)ccc3O)nc2s1	3.075	-6.62979	2.89951	98.2595	-0.0261844	1.50684	5.06027	0.972476	1.5	0.358622	0.999899	0.968671	0.6388	1	2.5	3.18303
CCN(CC)c1cc2n(c1-c1ccc3c(c1)C(=O)c1cccc(O)c1C3=O)CC=C2	3.111	-6.95787	4.09061	97.2289	0.789846	2.8399	4.54958	0.440113	2	0.308612	0.98646	0.982045	0.705144	0.5	2.5	2.02993
N#Cc1cc(Cl)ccc1NC(=O)c1nc2ccc(-c3ccc(-c4cccc5c4-c4nc6cccc7c6c(c4C5)CC7)cc3)cc2o1	3.136	-10.9029	5.01134	98.5706	0.637997	0.720789	2.30259	0.801421	2	0.980864	0.995096	0.955547	0.594524	0.5	2.5	-0.14014
CC(C)(C)c1ccc(C2=Nc3ccc4ccccc4c3C2(C)C)c(-c2nc3sc(-c4cc([N+](=O)[O-])ccc4O)nc3s2)c1	3.36	-9.11157	3.94655	99.1661	0.406335	0.46432	4.15507	0.933584	2	0.300608	0.999892	0.90418	0.979395	0.5	2.5	0.453643
CC1(C)C(c2cc3n(c2-c2oc4ccccc4c(=O)c2O)CC=C3)=Nc2c1ccc1ccccc21	3.428	-4.87617	3.6275	99.0403	0.184152	0.451779	5.12847	0.488961	1.5	0.372195	0.974228	0.857216	0.541718	1	2.5	-3.93126
CC1(C)C(c2cc3n(c2-c2ccc[nH]2)CC=C3)=Nc2ccc3ccccc3c21	3.53	-5.37831	3.87651	98.3424	0.255615	0.963962	6.5962	0.263542	1.5	0.397715	0.96191	0.897953	0.551347	1	2.5	-12.5424
COc1ccc(-c2ccc(-c3nc4ccc([N+](=O)[O-])cc4o3)c(O)c2)cc1	2.194	-5.88001	3.76903	97.631	-0.233372	1.68288	5.03092	0.649113	1.5	0.406745	0.996718	0.897982	0.768329	0.5	2	6.35598
COc1ccc(C#N)cc1-c1ccc(-c2nc3ccccc3[nH]2)c(O)c1	2.266	-4.96222	3.26656	98.0636	0.293413	1.71389	6.26545	0.95674	1.5	0.782975	0.916257	0.806036	0.351109	0.5	2	-2.94165
CNc1ccc(C#N)cc1-c1nc2ccc(-c3ccc([N+](=O)[O-])cc3)cc2o1	2.401	-6.70682	3.85057	97.7691	0.0879314	2.12215	4.68857	0.880528	2	0.726341	0.997295	0.916953	0.861371	0	2	-2.99219
CCCCN(CCCC)c1ccc2c(c1)C(=O)c1cc(-c3ccccc3)cc(O)c1C2=O	2.408	-8.08967	5.15968	99.0512	0.851455	0.569151	4.38404	0.383964	2	0.775581	0.969162	0.918615	0.730528	0	2	5.17259
CNc1ccc(C#N)cc1-c1cc(O)c2c(c1)C(=O)c1ccccc1C2=O	2.412	-7.24712	3.73531	97.3312	0.580988	2.66768	5.05207	0.938181	1.5	0.521467	0.990287	0.922622	0.782745	0.5	2	-0.987252
O=C1c2cc(-c3ccc(-c4ccc(-c5ccccc5)cc4)cc3)ccc2C(=O)c2c(O)cc(-c3ccc(C(F)(F)F)cc3)cc21	2.419	-12.3195	5.74166	98.5486	1.40234	0.317058	3.97605	0.768094	1	0.967173	0.999783	0.926353	0.000879265	1	2	-0.494678
CCN(CC)c1ccc(-c2ccc(-c3nc4ccc(C=Cc5ccccc5)cc4o3)c(O)c2)cc1	2.487	-6.98458	4.81523	98.5165	0.210874	0.802254	5.08987	0.374146	1.5	0.715241	0.52644	0.936658	0.999206	0.5	2	9.59968
CCCCN(CCCC)c1ccc(-c2oc3cc(C#N)ccc3c(=O)c2O)cc1	2.509	-5.2359	4.38903	98.5572	0.00623141	0.763535	5.40752	0.753221	1.5	0.834088	0.725228	0.507356	0.756087	0.5	2	-0.022561
Cc1cc(N(c2ccccc2)c2ccc(-c3ccc4c(c3)C(=O)c3cccc(O)c3C4=O)cc2)cc(C)c1C	2.521	-10.01	4.59687	99.4544	1.34459	0.398702	2.69499	0.624185	1	0.542313	0.997124	0.916668	0.360727	1	2	5.81114
CCCCN(CCCC)c1ccc(-c2ccc3oc(-c4ccc([N+](=O)[O-])cc4)c(O)c(=O)c3c2)cc1	2.523	-6.04136	4.60519	98.7636	-0.0725517	0.538233	4.23915	0.539718	2	0.832066	0.994483	0.904833	0.831216	0	2	8.99305
CCCCN(CCCC)c1ccc2c(c1)C(=O)c1cc(N(C)C)cc(O)c1C2=O	2.576	-7.74661	4.97592	98.3725	0.88663	1.3384	5.48768	0.387828	1.5	0.549948	0.940595	0.934957	0.853753	0.5	2	4.78086
CCCCN(CCCC)c1cc(O)c2c(c1)C(=O)c1cc(N(C)C)ccc1C2=O	2.583	-7.9714	5.04929	98.5153	0.912505	1.28976	5.50909	0.38769	1.5	0.517058	0.942363	0.94617	0.894755	0.5	2	5.72806
CCCCN(CCCC)c1cc(O)c2c(c1)C(=O)c1cc(-c3ccc(C(F)(F)F)cc3)ccc1C2=O	2.614	-9.01269	4.66491	99.7325	1.21646	0.198191	5.13725	0.483903	1.5	0.886965	0.974922	0.777751	0.329292	0.5	2	6.63506
CCCCN(CCCC)c1ccc(-c2ccc3c(c2)C(=O)c2cc(-c4ccc([N+](=O)[O-])cc4)cc(O)c2C3=O)cc1	2.652	-9.90142	4.65114	98.9681	0.817267	0.46618	3.77863	0.503168	2	0.944099	0.99978	0.992942	0.733567	0	2	6.17546
CCCCN(CCCC)c1ccc(-c2cc(O)c3c(c2)C(=O)c2cc(-c4ccc([N+](=O)[O-])cc4)ccc2C3=O)cc1	2.652	-9.90142	4.65114	98.9892	0.770802	0.444092	3.73242	0.505188	2	0.946929	0.999788	0.993091	0.735615	0	2	4.73097
CCN(CC)NC(=O)c1nc2c3ccccc3c3ccccc3c2o1	2.655	-5.26598	4.12052	97.7322	0.0108479	2.63243	7.8133	0.701856	1.5	0.419834	0.958885	0.909325	0.899794	0.5	2	-0.992309
COc1ccc(OC)c(-c2nc3sc(-c4cc(-c5ccc([N+](=O)[O-])cc5)ccc4O)nc3s2)c1	2.659	-7.19338	3.62904	98.4836	0.073402	1.08261	5.14854	0.818185	1.5	0.522582	0.999909	0.95865	0.742167	0.5	2	-4.80583
CCCCN(CCCC)c1ccc2c(c1)C(=O)c1cc(-c3cc(C)c(C)c(C)c3)cc(O)c1C2=O	2.659	-9.75476	5.54558	98.9034	0.930268	0.760382	4.67659	0.385004	2	0.810906	0.981283	0.92825	0.705896	0	2	5.84982
CCCCN(CCCC)c1oc2ccc([N+](=O)[O-])cc2c(=O)c1O	2.679	-4.85728	4.24725	99.1844	0.130842	0.431231	6.02449	0.857798	1.5	0.363021	0.843251	0.761733	0.994135	0.5	2	-3.06281
CCCCN(CCCC)c1cc(O)c2c(ccc3cc(-c4cc(C)c(C)c(C)c4)cnc32)c1	2.699	-6.92885	5.2336	98.846	0.681609	0.788415	6.40913	0.218871	1.5	0.91302	0.885968	0.726111	0.565867	0.5	2	-4.22135
O=C1c2cc(-c3nc4ccc(-c5ccc(-c6ccccc6)cc5)cc4[nH]3)ccc2C(=O)c2c(O)cc(-c3ccc(C(F)(F)F)cc3)cc21	2.77	-10.4793	4.70691	98.61	1.36276	0.398015	3.18099	0.83704	1	0.9626	0.999873	0.951258	0.00214305	1	2	-0.915945
COc1ccc(C(C)(C)C)cc1-c1nc2sc(-c3cc(-c4ccc([N+](=O)[O-])cc4)ccc3O)nc2s1	2.778	-8.29054	3.18411	98.9306	0.187757	0.748254	5.14861	0.886627	1.5	0.511932	0.999765	0.834032	0.841632	0.5	2	-5.36065
COc1cc(C(C)(C)C)ccc1-c1nc2sc(-c3cc(-c4ccc([N+](=O)[O-])cc4)ccc3O)nc2s1	2.783	-8.27959	3.1991	99.145	0.198813	0.609422	5.22219	0.879272	1.5	0.494226	0.999737	0.838386	0.854578	0.5	2	-5.27847
CCN(CC)Oc1cc(O)c2c(c1)C(=O)c1cc(-c3ccc(N(CC)CC)cc3)ccc1C2=O	2.831	-6.69087	3.79801	97.8486	0.780596	1.93363	6.30999	0.411533	1.5	0.570586	0.98277	0.974902	0.721713	0.5	2	7.30328
CCCCN(CCCC)c1ccc(-c2cc3cc(-c4nc5cc(-c6ccc([N+](=O)[O-])cc6)ccc5o4)c(O)cc3o2)cc1	2.848	-8.77584	4.52048	98.9776	0.409161	0.409758	3.09311	0.67528	2	0.862736	0.998051	0.871061	0.8597	0	2	3.85687
Cc1cc(N(c2ccccc2)c2ccc(-c3ccc4c(c3)C(=O)c3cc(-c5ccc(C(F)(F)F)cc5)cc(O)c3C4=O)cc2)cc(C)c1C	2.878	-11.4364	4.54882	100.638	1.67039	0.0816254	3.48723	0.686291	1	0.887001	0.999567	0.789741	0.0378659	1	2	3.30404
CCCCN(CCCC)c1ccc(-c2ccc3c(c2)C(=O)c2cc(-c4ccc(C=C(C#N)C#N)cc4)cc(O)c2C3=O)cc1	2.952	-10.8668	4.59123	99.289	0.170228	0.29393	3.28452	0.754494	2	0.866642	0.999093	0.983825	0.822184	0	2	9.74265
CCN(CC)c1ccc2cc(-c3ccc4c(c3)C(=O)c3cc(-c5ccc(N(c6ccccc6)c6ccccc6)cc5)cc(O)c3C4=O)oc2c1	2.957	-10.7904	5.35029	99.2783	1.35333	0.395206	1.42775	0.803456	1	0.25412	0.999258	0.904714	0.96162	1	2	2.42499
CCCCN(CCCC)c1cc(O)c2c(ccc3cc(N(C)C)cnc32)c1	2.669	-5.54311	4.40072	98.0765	0.607693	1.74602	6.41468	0.265473	1.5	0.752629	0.758497	0.755577	0.814201	0	1.5	-1.18507
CCCCN(CCCC)c1cc(O)c2c(c1)C(=O)c1cc(-c3cc(C)c(C)c(C)c3)ccc1C2=O	2.669	-9.87294	5.53195	99.3328	1.05104	0.541065	5.3015	0.342094	1.5	0.83526	0.986582	0.935453	0.727515	0	1.5	8.21643
CCN(CC)c1ccc(-c2ccc3c(c2)C(=O)c2cc(-c4nc5ccc(-c6ccc(N(c7ccccc7)c7ccccc7)cc6)cc5[nH]4)cc(O)c2C3=O)cc1	3.1	-10.3514	4.83558	99.6249	1.39656	0.262412	1.59667	0.619112	1	0.787328	0.999934	0.978069	0.458903	0.5	1.5	8.63428
CCCCN(CCCC)c1ccc2c(c1)C(=O)c1cc(-c3ccc(N(c4ccccc4)c4ccccc4)cc3)cc(O)c1C2=O	2.748	-10.4684	5.11443	100.024	1.35715	0.201735	2.4083	0.549579	1	0.807865	0.990331	0.816455	0.971894	0	1	4.40646
CCCCN(CCCC)c1ccc(-c2ccc3c(c2)C(=O)c2cc(-c4ccc(N(c5ccccc5)c5ccccc5)cc4)cc(O)c2C3=O)cc1	2.85	-11.7206	5.53126	100.383	1.50059	0.132161	2.08005	0.589428	1	0.938006	0.99786	0.867093	0.832197	0	1	2.63541
